# Supplementary material for: Scanxiety: a scoping review about scan-associated anxiety
Source: PubMed Central journal article supplement — BMJ Open. 2021 May 26;11(5):e043215. doi: 10.1136/bmjopen-2020-043215 (PMC8160190; doi:10.1136/bmjopen-2020-043215), 2021-05-26
Supplement: bmjopen-2020-043215.draft_revisions.pdf [file bmjopen-2020-043215.draft_revisions.pdf]

# BMJ Open

BMJ Open is committed to open peer review. As part of this commitment we make the peer review history of every article we publish publicly available.

When an article is published we post the peer reviewers' comments and the authors' responses online. We also post the versions of the paper that were used during peer review. These are the versions that the peer review comments apply to.

The versions of the paper that follow are the versions that were submitted during the peer review process. They are not the versions of record or the final published versions. They should not be cited or distributed as the published version of this manuscript.

BMJ Open is an open access journal and the full, final, typeset and author-corrected version of record of the manuscript is available on our site with no access controls, subscription charges or pay-per-view fees (<http://bmjopen.bmj.com>).

If you have any questions on BMJ Open's open peer review process please email [info.bmjopen@bmj.com](mailto:info.bmjopen@bmj.com)

# BMJ Open

## What is scanxiety? A systematic scoping review

|                               |                                                                                                                                                                                                                                                                                                                                                                                                                                                                                                                                                         |
|-------------------------------|---------------------------------------------------------------------------------------------------------------------------------------------------------------------------------------------------------------------------------------------------------------------------------------------------------------------------------------------------------------------------------------------------------------------------------------------------------------------------------------------------------------------------------------------------------|
| Journal:                      | <i>BMJ Open</i>                                                                                                                                                                                                                                                                                                                                                                                                                                                                                                                                         |
| Manuscript ID                 | bmjopen-2020-043215                                                                                                                                                                                                                                                                                                                                                                                                                                                                                                                                     |
| Article Type:                 | Original research                                                                                                                                                                                                                                                                                                                                                                                                                                                                                                                                       |
| Date Submitted by the Author: | 30-Jul-2020                                                                                                                                                                                                                                                                                                                                                                                                                                                                                                                                             |
| Complete List of Authors:     | Bui, Kim Tam; Concord Repatriation General Hospital, Medical Oncology; The University of Sydney Sydney Medical School<br>Liang, Roger; Concord Repatriation General Hospital, Medical Oncology<br>Kiely, Belinda; Concord Repatriation General Hospital, Medical Oncology; The University of Sydney Sydney Medical School<br>Brown, Chris; NHMRC Clinical Trials Centre<br>Dhillon, Haryana; The University of Sydney, Psycho-Oncology Cooperative Research Group; CEMPED<br>Blinman, Prunella; Concord Repatriation General Hospital, Medical Oncology |
| Keywords:                     | Adult oncology < ONCOLOGY, Diagnostic radiology < RADIOLOGY & IMAGING, Anxiety disorders < PSYCHIATRY                                                                                                                                                                                                                                                                                                                                                                                                                                                   |
|                               |                                                                                                                                                                                                                                                                                                                                                                                                                                                                                                                                                         |

SCHOLARONE™  
Manuscripts

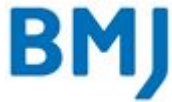

I, the Submitting Author has the right to grant and does grant on behalf of all authors of the Work (as defined in the below author licence), an exclusive licence and/or a non-exclusive licence for contributions from authors who are: i) UK Crown employees; ii) where BMJ has agreed a CC-BY licence shall apply, and/or iii) in accordance with the terms applicable for US Federal Government officers or employees acting as part of their official duties; on a worldwide, perpetual, irrevocable, royalty-free basis to BMJ Publishing Group Ltd ("BMJ") its licensees and where the relevant Journal is co-owned by BMJ to the co-owners of the Journal, to publish the Work in this journal and any other BMJ products and to exploit all rights, as set out in our [licence](#).

The Submitting Author accepts and understands that any supply made under these terms is made by BMJ to the Submitting Author unless you are acting as an employee on behalf of your employer or a postgraduate student of an affiliated institution which is paying any applicable article publishing charge ("APC") for Open Access articles. Where the Submitting Author wishes to make the Work available on an Open Access basis (and intends to pay the relevant APC), the terms of reuse of such Open Access shall be governed by a Creative Commons licence – details of these licences and which [Creative Commons](#) licence will apply to this Work are set out in our licence referred to above.

Other than as permitted in any relevant BMJ Author's Self Archiving Policies, I confirm this Work has not been accepted for publication elsewhere, is not being considered for publication elsewhere and does not duplicate material already published. I confirm all authors consent to publication of this Work and authorise the granting of this licence.

**Title**

What is scanxiety? A systematic scoping review

**Authors:**

Kim Tam Bui<sup>1,2</sup>, Roger Liang<sup>1</sup>, Belinda E Kiely<sup>1,2,3</sup>, Chris Brown<sup>3</sup>, Haryana M Dhillon<sup>4,5</sup> & Prunella Blinman<sup>1,2</sup>

**Affiliations:**

<sup>1</sup>Medical Oncology, Concord Cancer Centre, Concord, NSW, Australia

<sup>2</sup>Sydney Medical School, University of Sydney, Camperdown, NSW, Australia

<sup>3</sup>NHMRC Clinical Trials Centre, University of Sydney, Camperdown, NSW, Australia

<sup>4</sup>Psycho-Oncology Cooperative Research Group, School of Psychology, University of Sydney, Camperdown, NSW, Australia

<sup>5</sup>Centre for Medical Psychology & Evidence-based Decision-making, University of Sydney, Camperdown NSW, Australia

**Corresponding author:**

Prunella Blinman

Postal address: Medical Oncology

Concord Cancer Centre

1A Hospital Road

Concord NSW 2137

Email: [prunella.blinman@health.nsw.gov.au](mailto:prunella.blinman@health.nsw.gov.au)

ORCID ID: 0000-0002-0712-372X

**Word count: 3997**

Keywords: scanxiety, imaging, scans, cancer, anxiety

**Upcoming presentations**

Bui KT, Liang R, Kiely BE, Brown C, Dhillon HM & Blinman P. What is scanxiety? A systematic scoping review [abstract]. *Asia Pac J Clin Oncol*. Forthcoming 2020

## Abstract

**Objectives:** To identify the available literature on the prevalence, severity and contributing factors of scan-associated anxiety ('scanxiety'), and interventions to reduce it.

**Design:** Systematic scoping review.

**Data sources:** Ovid MEDLINE, Ovid EMBASE, Ovid PsycINFO, Ovid Cochrane Central Register of Controlled Trials, Scopus, EBSCO CINAHL and PubMed up to July 2020.

**Study selection:** Eligible studies recruited people having a cancer-related non-invasive scan (including screening) and contained a quantitative assessment of scanxiety.

**Data extraction:** Demographics and scanxiety outcomes were recorded for each study and the data summarised by descriptive statistics.

**Results:** Of 26,693 citations, 57 studies were eligible for inclusion across a range of scan types (mammogram 26/57, 46%; positron-emission tomography 14/57, 25%; computed tomography 14/57, 25%) and designs (observation 47/57, 82%; intervention 10/57, 18%). Eighty-one measurement tools were used to quantify the prevalence and/or severity of scanxiety, including purpose-designed Likert scales (17/81, 21%); the State Trait Anxiety Inventory (14/81, 17%) and the Hospital Anxiety and Depression Scale (9/81, 11%). Scanxiety prevalence ranged from 0% to 83%. Mean severity scores were low in almost all measures which quantitatively measured scanxiety (54/62, 87%). Moderate to severe scanxiety occurred in 4% to 28% of people in studies using descriptive measures. Nine of 20 studies assessing scanxiety pre- and post-scan reported a significant post-scan reduction in scanxiety, although absolute differences were low. Lower education, smoking, higher levels of pain, higher perceived risk of cancer and diagnostic scans (v screening scans) consistently correlated with higher scanxiety severity, but not age, gender, ethnicity or marital status. Interventions included relaxation, distraction, education and psychological support. Six of the 10 interventions showed a reduction in scanxiety.

**Conclusions:** Prevalence and severity of scanxiety varied widely likely due to heterogeneous methods of measurement. A uniform approach to evaluating scanxiety will improve understanding of the phenomenon and help guide interventions.

## Strengths and limitations of this study

- This is the first scoping review on scanxiety
- A comprehensive search strategy and broad inclusion criteria have resulted in an extensive summary of all available literature
- Summary statistics for prevalence and severity of scanxiety were not possible due to heterogeneity in the type and timing of measurement tools between the studies.

## INTRODUCTION

Anxiety may increase when people have scans to screen for, diagnose, or stage cancer, or to monitor cancer for recurrence or progression. Scan-associated anxiety, or the distress before, during or after a scan, was first dubbed 'scanxiety' by a patient writing for the Time Magazine in 2011[1].

Qualitative research on the experience of having a scan has shown some people experience dread in the weeks before a scan[2], perceive scans as dehumanising, unpleasant or causing claustrophobia[2-5], and find scans trigger fear of the unknown and fear of cancer recurrence[2, 3, 6]. Scanxiety is recognised as a common clinical concern on social media and public forums, and is acknowledged by international cancer institutions[7, 8] and cancer-specific support networks[9-11]. Despite this, scanxiety is not uniformly recognised or measured in published studies. We conducted a systematic scoping review to identify the available literature on scanxiety in people having cancer-related scans.

## METHODS

We conducted a systematic scoping review based on the six-step methodological framework developed by Arskey & O'Malley[12] and modified by Levac *et al.*[13], and guided by the Preferred Reporting Items for Systematic review and Meta-Analysis protocols extension for Scoping Reviews (PRISMA-ScR) checklist[14]. The study protocol is available (**Supplementary File 1**).

### Step 1: Research question

Our aims were to: determine the prevalence and severity of scanxiety; identify contributing factors to scanxiety; and, identify interventions to reduce scanxiety in people having cancer-related scans.

### Step 2: Search strategy

Published studies were identified from seven electronic databases: Ovid MEDLINE (1946 onwards), Ovid EMBASE (1947 onwards), Ovid PsycINFO (1806 onwards), Ovid Cochrane Central Register of Controlled Trials (1991 onwards), Scopus (any year), EBSCO CINAHL (any year) and PubMed (any year). The search strategy combined the subject headings and keywords of cancer, imaging and anxiety. An example is provided in **Figure 1**. Reference lists of included articles were hand-searched for additional studies. All references were imported into Endnote V9.

The initial search was conducted on April 11, 2019, and updated on July 3, 2020.

### Step 3: Study selection

Inclusion criteria were full-text original research studies that recruited adults ( $\geq 18$  years old) who had a non-invasive scan for a cancer-related reason, and which quantitatively assessed the prevalence or severity of scanxiety, reported a statistical comparison between pre- and post-scan scanxiety, reported a

1  
2  
3 statistical comparison between scanxiety and possible contributing factors, or evaluated the impact of  
4 an intervention on scanxiety.  
5

6 The measurement of scanxiety was defined as any measure of anxiety, distress or worry occurring  
7 around the time of a scan. All non-invasive imaging modalities were accepted. No date restrictions were  
8 applied. Foreign language material was included if an English translation was available.  
9

10 After initial review of citations and based on increasing familiarity with the literature, and in line with  
11 recommendations on scoping review methodology[12], exclusion criteria were developed *post hoc*.  
12 Exclusion criteria were: studies involving invasive scans (eg transvaginal ultrasound, ultrasound with fine  
13 needle aspirate, or endoscopic ultrasound) due to potential confounding from significant differences in  
14 scan preparation and increased risk of adverse events; studies of follow-up scans for a positive initial  
15 screening result due to the potential confounding from the experience of being recalled for another  
16 investigation; and, studies reporting only a qualitative assessment of scanxiety.  
17  
18

19 After removal of duplicate citations, two authors (KTB and RL) independently reviewed and screened  
20 publication titles and abstracts based on the eligibility criteria. Of the studies deemed potentially  
21 eligible, full texts were evaluated for final inclusion. Discrepancies were resolved by discussion between  
22 the two authors (KTB and RL) and were escalated to all authors if a consensus could not be reached.  
23  
24  
25  
26

#### 27 **Step 4: Charting the data**

28 Relevant data were independently extracted by two authors (KTB and RL) into an electronic data  
29 extraction form, which included study demographics and methodology, scanxiety measurement tools,  
30 and the outcome measures of prevalence and severity of scanxiety, contributing factors to scanxiety,  
31 and interventions to reduce scanxiety.  
32  
33  
34  
35

#### 36 **Step 5: Collating, summarizing and reporting the results**

37 Study data was tabulated to assist with a descriptive numerical summary of the range of cancer types,  
38 imaging modalities, study methodology and scanxiety measurement tools. Associations between  
39 scanxiety and potential contributing factors were tabulated if three or more studies reported a  
40 statistical comparison.  
41  
42

43 The prevalence of scanxiety was identified in two ways:

- 44 • The percentage of people who scored above the pre-specified clinically important anxiety  
45 threshold, if reported; or,
- 46 • The percentage of people who scored any degree of anxiety, if no pre-specified threshold was  
47 reported.  
48  
49  
50

51 Severity of scanxiety was defined in three ways:

- 52 • Any mean score of the anxiety measure above the pre-specified clinically important anxiety  
53 threshold, if reported;  
54  
55  
56  
57  
58

- Any mean score of the anxiety measure that was at least half the total score, if an anxiety threshold was not reported; or
- At least 'moderate' anxiety (or its equivalent) on a descriptive range.

The components of intervention studies and their effect on scanxiety were summarised and reported descriptively.

### Step 6: Consultation

Medical oncologists (PB, BK) and a behavioural scientist (HD) were consulted for content expertise to share preliminary findings and improve clarity on clinically relevant interpretations of the data.

### Patient and public involvement

This research did not directly involve patients and public. Our research was initiated by repeated observations of scanxiety in oncology patients.

## RESULTS

The study search identified 26,693 citations. The selection process is outlined in **Figure 2**. After removal of duplicates, abstract and title screening, and full-text review, 57 eligible studies involving 21,352 people were included.

### Demographics and study details

#### Observational studies

There were 47 observational studies (**Table 1**) involving 19,498 people[15-61]. Participants commonly had scans for breast cancer (22 studies,  $n=14,338$  women[16, 18-27, 29, 31, 36, 38, 40, 42, 43, 45, 48, 56, 58]), and lung cancer (6 studies,  $n=2,758$  people[30, 32, 35, 49, 54, 57]). The most common scans were mammograms (21 studies[16, 18-27, 29, 31, 36, 38, 40, 42, 43, 45, 48, 56]), standalone computed tomography (CT) scans (13 studies[17, 30, 32-35, 37, 44, 49, 52, 54, 57, 60]), positron-emission tomography (PET) with or without CT scans (11 studies[33, 34, 39, 46, 47, 49-53, 59]) and magnetic resonance imaging (MRI) (10 studies[38, 42, 44, 48, 49, 52, 53, 58, 60, 61]). There were 27 cross-sectional studies[15, 17, 19, 22, 27, 28, 33, 34, 36, 37, 39-41, 43-47, 49, 53-60] and 20 were longitudinal[16, 18, 20, 21, 23-26, 29-32, 35, 38, 42, 48, 50-52, 61]. Most studies used self-report surveys to assess scanxiety (40 studies[15, 16, 18-36, 38, 40-54, 56, 58, 59]), and seven studies used interviews[17, 37, 39, 55, 57, 60, 61].



Table 1. Demographics and study details for the 47 observational studies

| First author                    | Year | n    | Country of study     | Cancer type   | Age (years) (Mean <sup>a</sup> )                                               | Female (%) | Married or de facto (%) | At least secondary education (%) | First scan (%) | Scan type              | Reason for scan           | Methods                   |
|---------------------------------|------|------|----------------------|---------------|--------------------------------------------------------------------------------|------------|-------------------------|----------------------------------|----------------|------------------------|---------------------------|---------------------------|
| Andolf[15]                      | 1990 | 275  | Sweden               | Ovarian       | NR                                                                             | 100        | NR                      | NR                               | NR             | Abdominal ultrasound   | Screening                 | Cross-sectional survey    |
| Bull <sup>b,c</sup> [16]        | 1991 | 541  | UK                   | Breast        | 50 to 54: 23%<br>55 to 59s 29%<br>60 to 64: 34%<br>65 to 70: 7%<br>Unknown: 7% | 100        | NR                      | NR                               | NR             | Mammogram              | Screening                 | Longitudinal surveys      |
| Peteet[17]                      | 1992 | 79   | USA                  | Any           | NR                                                                             | NR         | NR                      | NR                               | 4              | CT                     | Any (except screening)    | Cross-sectional interview |
| Cockburn <sup>c</sup> [18]      | 1994 | 200  | Australia            | Breast        | NR                                                                             | 100        | NR                      | NR                               | NR             | Mammogram              | Screening                 | Longitudinal surveys      |
| Ellman <sup>c</sup> [19]        | 1995 | 331  | UK                   | Breast        | 50 to 64: 52%<br>65 to 78: 48%                                                 | 100        | NR                      | NR                               | NR             | Mammogram              | Screening or surveillance | Cross-sectional survey    |
| Sutton <sup>c,d</sup> [20]      | 1995 | 306  | UK                   | Breast        | 58                                                                             | 100        | 76                      | 50                               | NR             | Mammogram              | Screening                 | Longitudinal surveys      |
| Bakker[21]                      | 1998 | 315  | Canada               | Breast        | 61                                                                             | 100        | 71                      | 76                               | 50             | Mammogram              | Screening                 | Longitudinal surveys      |
| Gupta[22]                       | 1999 | 167  | Kuwait               | Breast        | Range 14 to 63                                                                 | 100        | NR                      | 82                               | NR             | Mammogram ± ultrasound | Screening or diagnosis    | Cross-sectional survey    |
| Hafslund[23]                    | 2000 | 170  | Norway               | Breast        | NR                                                                             | 100        | NR                      | NR                               | NR             | Mammogram              | Diagnosis                 | Longitudinal surveys      |
| Meystre-Agostoni[24]            | 2001 | 887  | Switzerland          | Breast        | 50 to 54: 36%<br>55 to 59: 22%<br>60 to 64: 20%<br>65 to 69: 22%               | 100        | 77                      | 62                               | 27             | Mammogram              | Screening                 | Longitudinal surveys      |
| Drossaert[25]                   | 2002 | 2657 | Netherlands          | Breast        | 58                                                                             | 100        | 78                      | 32                               | NR             | Mammogram              | Screening                 | Longitudinal surveys      |
| Sandin <sup>c,d</sup> [26]      | 2002 | 598  | Spain                | Breast        | 51                                                                             | 100        | 77                      | 41                               | NR             | Mammogram              | Screening                 | Longitudinal surveys      |
| Brunton[27]                     | 2005 | 584  | New Zealand          | Breast        | 50 to 54: 38%<br>55 to 59: 35%<br>60 to 64: 27%                                | 100        | NR                      | 74                               | <20%           | Mammogram              | Screening                 | Cross-sectional survey    |
| Geurts[28]                      | 2006 | 106  | Netherlands          | Head and neck | 56                                                                             | 36         | NR                      | 29                               | NR             | Chest X-ray            | Surveillance              | Cross-sectional survey    |
| Tyndel <sup>c</sup> [29]        | 2007 | 1174 | UK                   | Breast        | 43                                                                             | 100        | 83                      | 33                               | 87             | Mammogram              | Screening                 | Longitudinal surveys      |
| Bunge <sup>b</sup> [30]         | 2008 | 324  | Netherlands, Belgium | Lung          | 60                                                                             | 49         | NR                      | NR                               | NR             | CT                     | Screening                 | Longitudinal surveys      |
| Brown Sofair <sup>b</sup> [31]  | 2008 | 47   | USA                  | Breast        | 50                                                                             | 100        | 34                      | 80                               | NR             | Mammogram              | Screening                 | Longitudinal surveys      |
| van den Bergh <sup>b</sup> [32] | 2008 | 324  | Netherlands, Belgium | Lung          | 60                                                                             | 49         | 64                      | 82                               | 66             | CT                     | Screening                 | Longitudinal surveys      |
| Westerterp <sup>b</sup> [33]    | 2008 | 82   | Netherlands          | Oesophageal   | 64                                                                             | 18         | NR                      | NR                               | NR             | CT + PET               | Diagnosis & staging       | Cross-sectional survey    |
| Bastiaannet[34]                 | 2009 | 59   | Netherlands          | Melanoma      | Median: 59                                                                     | 44         | 69                      | 66                               | NR             | CT, PET ± Chest X-ray  | Staging                   | Cross-sectional survey    |
| Vierikko <sup>b</sup> [35]      | 2009 | 601  | Finland              | Lung          | 65                                                                             | 0          | 36                      | NR                               | NR             | CT                     | Screening                 | Longitudinal surveys      |

|                            |      |      |                 |                           |            |     |    |    |     |                              |                                    |                           |
|----------------------------|------|------|-----------------|---------------------------|------------|-----|----|----|-----|------------------------------|------------------------------------|---------------------------|
| Bolukbas[36]               | 2010 | 93   | Turkey          | Breast                    | 48         | 100 | 97 | 10 | 45  | Mammogram                    | Screening or diagnosis             | Cross-sectional survey    |
| Thompson[37]               | 2010 | 70   | USA             | Lymphoma                  | Median: 47 | 64  | 53 | 97 | NR  | CT                           | Surveillance                       | Cross-sectional interview |
| Hutton <sup>b</sup> [38]   | 2011 | 527  | UK              | Breast                    | Median: 40 | 100 | 79 | NR | 75  | Mammogram ± MRI              | Screening                          | Longitudinal surveys      |
| Pifarre[39]                | 2011 | 200  | Spain           | Any                       | 52         | 51  | NR | NR | 67  | PET/CT                       | Any (except screening)             | Cross-sectional interview |
| Steinemann[40]             | 2011 | 227  | USA             | Breast                    | NR         | 100 | NR | NR | NR  | Mammogram                    | Screening or diagnosis             | Cross-sectional survey    |
| Yu[41]                     | 2011 | 398  | Brazil          | Any                       | 54         | 79  | 56 | 57 | 27  | Any                          | Any (except screening)             | Cross-sectional survey    |
| Bredart <sup>b</sup> [42]  | 2012 | 637  | France          | Breast                    | 50         | 100 | NR | 87 | NR  | Mammogram ± ultrasound ± MRI | Screening or surveillance          | Longitudinal surveys      |
| Hafslund <sup>c</sup> [43] | 2012 | 4249 | Norway          | Breast                    | 58         | 100 | NR | 52 | NR  | Mammogram                    | Screening                          | Cross-sectional survey    |
| Adams <sup>c</sup> [44]    | 2014 | 36   | Netherlands     | Lymphoma                  | 50         | 42  | NR | NR | NR  | CT & MRI                     | Staging                            | Cross-sectional survey    |
| Baena-Canada[45]           | 2014 | 434  | Spain           | Breast                    | 54         | 100 | 72 | 43 | 18  | Mammogram                    | Screening                          | Cross-sectional survey    |
| Andersson[46]              | 2015 | 169  | Sweden          | Any                       | 64         | 47  | 62 | 62 | 100 | PET/CT                       | Any (except screening)             | Cross-sectional survey    |
| Elboga[47]                 | 2015 | 144  | Turkey          | Any                       | 63         | 46  | 83 | 52 | NR  | PET/CT                       | Any (except screening)             | Cross-sectional survey    |
| Hobbs[48]                  | 2015 | 49   | Australia       | Breast                    | 55         | 100 | 79 | NR | 75  | Mammogram ± MRI              | Diagnosis                          | Longitudinal surveys      |
| Baum[49]                   | 2016 | 103  | USA             | Lung                      | Median: 67 | 61  | 73 | 53 | NR  | CT, PET ± MRI                | Monitoring                         | Cross-sectional survey    |
| Abreu[50]                  | 2017 | 232  | Portugal        | Any                       | 61         | 51  | NR | 73 | 71  | PET/CT                       | Any (except screening)             | Longitudinal surveys      |
| Grilo[51]                  | 2017 | 81   | Spain, Portugal | Any                       | 55         | 53  | NR | 41 | 47  | PET/CT                       | Any (except screening)             | Longitudinal surveys      |
| Evans[52]                  | 2018 | 115  | UK              | Colorectal or Lung        | 66         | 33  | NR | NR | NR  | Whole body MRI, PET + CT     | Staging                            | Longitudinal surveys      |
| Goense[53]                 | 2018 | 27   | Netherlands     | Oesophageal               | 64         | 15  | NR | NR | NR  | MRI + PET/CT                 | Staging & monitoring               | Cross-sectional survey    |
| Hall[54]                   | 2018 | 169  | USA             | Lung                      | 64         | 51  | 58 | 96 | NR  | Low dose CT                  | Screening                          | Cross-sectional survey    |
| Derry[55]                  | 2019 | 94   | USA             | Any                       | 61         | 72  | NR | 69 | 0   | Any                          | Monitoring                         | Longitudinal interview    |
| Soriano[56]                | 2019 | 57   | USA             | Breast                    | 58         | 100 | 93 | NR | 0   | Mammogram                    | Surveillance                       | Longitudinal survey       |
| Taghizadeh[57]             | 2019 | 1237 | Canada          | Lung                      | 63         | 56  | NR | 85 | NR  | CT                           | Screening                          | Longitudinal interview    |
| Bancroft[58]               | 2020 | 88   | UK, Ireland     | Breast                    | 38         | 61  | 50 | 83 | NR  | MRI                          | Screening                          | Longitudinal survey       |
| Grilo[59]                  | 2020 | 94   | Portugal        | Any                       | 61         | 54  | NR | 99 | 77  | PET + bone scan              | Staging, monitoring & surveillance | Longitudinal survey       |
| Morreale[60]               | 2020 | 87   | USA             | Gastrointestinal and Lung | 62         | 55  | NR | 92 | NR  | CT or MRI                    | Monitoring                         | Longitudinal interview    |
| Paiella[61]                | 2020 | 54   | Italy           | Pancreatic                | 50         | 61  | NR | NR | NR  | MRI – MRCP                   | Screening                          | Cross-sectional interview |

1  
2  
3  
4  
5  
6  
7  
8  
9  
10  
11  
12  
13  
14  
15  
16  
17  
18  
19  
20  
21  
22  
23  
24  
25  
26  
27  
28  
29  
30  
31  
32  
33  
34  
35  
36  
37  
38  
39  
40  
41  
42  
43  
44  
45  
46  
47

UK United Kingdom, USA United States of America, NR not reported, CT computed tomography, PET positron emission tomography, MRI magnetic resonance imaging, MRCP Magnetic resonance cholangiopancreatography

All percentages were rounded to the nearest whole number

<sup>a</sup>Unless otherwise stated

<sup>b</sup>Demographic data is based on participants who completed the first survey

<sup>c</sup>These studies collected data from other groups who were not included in this review as they did not meet eligibility criteria. This included people having invasive procedures such as fine needle aspirate or open surgical biopsy[16, 33], people with abnormal screening results[18, 26, 29] and people who did not have a scan[18-20, 43]

<sup>d</sup>Demographics based on the entire population even if not all participants were eligible for this review.

<sup>e</sup>Four paediatric participants were included in this study.

For peer review only

1  
2  
3 Twenty-one studies were conducted in people having scans for screening[15, 16, 18, 20, 21, 24-27, 29-  
4 32, 35, 38, 43, 45, 54, 57, 58, 61]. In the remaining studies, reasons for scanning included diagnosis[23,  
5 48], staging[34, 44, 52], monitoring[49, 55, 60], surveillance to detect recurrence[28, 37, 56] or a  
6 combination of reasons in people with known or suspected cancers (17 studies[17, 39, 41, 46, 47, 50, 51,  
7 53, 59]). Five studies permitted scans for both screening and non-screening reasons (namely,  
8 diagnosis[22, 36, 40] or surveillance[19, 42])  
9  
10

11 The mean age of participants, reported by 33 studies, was 56.9 years (range 38 to 66 years)[20, 21, 25,  
12 26, 28-33, 35, 36, 39, 41-48, 50-61]. The majority of participants were women (87%)[15, 16, 18-61].  
13 When studies involving scans for breast cancer were excluded, there were similar proportions of men  
14 and women (women 49%, men 51%)[15, 27, 28, 30, 32-35, 37, 39, 41, 44, 46, 47, 49-55, 57, 59-61].  
15 There was variation in the reporting and proportion of participants who were married (22 studies, range  
16 34% to 97%[20, 21, 24-26, 29, 31, 32, 34-38, 41, 45-49, 54, 56, 58]), who received at least secondary  
17 education (29 studies, range 10% to 99%[20-22, 24-29, 31, 32, 34, 36, 37, 41-43, 45-47, 49-51, 54, 55,  
18 57-60]) and who were attending their first scan (18 studies, range 0% to 100%[17, 21, 24, 27, 29, 32, 36,  
19 38, 39, 41, 45, 46, 48, 50, 51, 55, 56, 59]).  
20  
21  
22  
23  
24  
25

#### 26 Intervention studies

27 There were ten intervention studies (**Table 2**) involving 1,854 people[62-71]. This included people having  
28 scans for breast cancer (6 studies,  $n=1,449$  people[62-65, 69, 70]) and lung cancer (1 study,  $n=16$   
29 people[68]). Scans included mammogram (5 studies[62-64, 69, 70]), PET/CT (3 studies[66, 67, 71]),  
30 MRI[65], CT[68] and ultrasound[70] (1 study each). Four studies involved scans for screening[63, 64, 68,  
31 69], one for diagnosis[65], three for any reason in people with known or suspected cancers[66, 67, 71],  
32 and two where scans for screening, surveillance and/or diagnosis were permitted[62, 70].  
33  
34

35 The mean age of participants was reported by five studies and ranged from 47 to 65 years[63, 65, 68, 69,  
36 71]. The majority were women (94%[62-66, 68-71]). There was variation in the reporting and proportion  
37 of participants who were married (2 studies, 73% and 75%[64, 65]), received at least secondary  
38 education (6 studies, range 28 to 100%[62-65, 68, 69]), and participants attending their first scan (5  
39 studies, range 4% to 54%[62-64, 66, 71]).  
40  
41

42 Eight studies allocated participants to an intervention or control group[63-69, 71], one study compared  
43 two interventions[62] and one study delivered the intervention to all participants[70]. Two interventions  
44 were multifaceted[64, 65]. Types of interventions included: relaxation, distraction, and/or meditation (6  
45 studies[62, 63, 66, 69-71]); education (4 studies[62, 64, 65, 68]); emotional or psychosocial support (2  
46 studies[64, 65]); or, adjustments to routine logistics of the scan (1 study[67]).  
47  
48  
49  
50  
51  
52  
53  
54  
55  
56  
57  
58

**Table 2.** Demographics and study details for the 10 intervention studies to reduce scanxiety

| First author        | Year | n   | Country of study | Cancer type | Age (years) (Mean <sup>a</sup> )                                   | Female (%) | Married or de facto (%) | At least secondary education (%) | First scan (%) | Scan type              | Reason for scan                      | Allocation                  | Intervention and control groups                                           |
|---------------------|------|-----|------------------|-------------|--------------------------------------------------------------------|------------|-------------------------|----------------------------------|----------------|------------------------|--------------------------------------|-----------------------------|---------------------------------------------------------------------------|
| Mainiero[62]        | 2001 | 613 | USA              | Breast      | < 40: 8%<br>50 to 50: 39%<br>50 to 60: 28%<br>>70: 9%              | 100        | NR                      | 95                               | 7              | Mammogram              | Screening or surveillance            | Consecutive <sup>b</sup>    | Educational or entertaining video in waiting room                         |
| Domar[63]           | 2005 | 143 | USA              | Breast      | 52                                                                 | 100        | NR                      | 81                               | 8              | Mammogram              | Screening                            | Randomised                  | Relaxation, music or blank audiotape in waiting room and during scan      |
| Fernandez-Feito[64] | 2005 | 436 | Spain            | Breast      | 50 to 54: 24%<br>55 to 59: 30%<br>60 to 64: 23%<br>65 to 69: 22%   | 100        | 73                      | 28                               | 4              | Mammogram              | Screening                            | Randomised                  | Pre-scan nursing intervention or usual care                               |
| Caruso[65]          | 2006 | 44  | Italy            | Breast      | 47                                                                 | 100        | 75                      | 89                               | NR             | MRI                    | Diagnosis                            | Randomised                  | Pre-scan informative-emotive psychological support or routine information |
| Vogel[66]           | 2012 | 101 | Netherlands      | Any         | Median: 58                                                         | 51         | NR                      | NR                               | 41             | PET/CT                 | Any (except screening)               | Randomised                  | Audiovisual installation or usual care during FDG uptake                  |
| Acuff[67]           | 2014 | 180 | USA              | Any         | NR                                                                 | NR         | NR                      | NR                               | NR             | PET/CT                 | Any (except screening)               | Unclear                     | Hand-held communication device or usual care during scan                  |
| Raz[68]             | 2014 | 16  | USA              | Lung        | 65                                                                 | 75         | NR                      | 100                              | NR             | CT                     | Screening                            | Sequential <sup>c</sup>     | Pre-scan multimedia education or usual care                               |
| Zavotsky[69]        | 2014 | 100 | USA              | Breast      | 54                                                                 | 100        | NR                      | 98                               | NR             | Mammogram              | Screening                            | Non-randomised <sup>d</sup> | Music or no music during scan                                             |
| Ashton[70]          | 2019 | 113 | USA              | Breast      | 18 to 39: 3.6%<br>40 to 59: 51.8%<br>60 to 79: 39.3%<br>> 80: 5.4% | 100        | NR                      | NR                               | NR             | Mammogram ± ultrasound | Screening, surveillance or diagnosis | NA <sup>e</sup>             | Shoulder & neck massage ± hand massage                                    |
| Lorca[71]           | 2019 | 108 | Spain            | Any         | 59                                                                 | 57         | NR                      | NR                               | 54             | PET/CT                 | Any (except screening)               | Randomised                  | Mindfulness meditation or usual care during FDG uptake                    |

USA United States of America, NR not reported, MRI magnetic resonance imaging, PET positron emission tomography, CT computed tomography, FDG fluorodeoxyglucose

All percentages were rounded to the nearest whole number

<sup>a</sup>Unless otherwise stated

<sup>b</sup>Each intervention was administered during one half of the study period

<sup>c</sup>Participants were enrolled into the control arm first, followed by the intervention arm

<sup>d</sup>Participants attending on Mondays, Wednesdays and Fridays were allocated to the intervention arm, and participants attending on Tuesdays and Thursdays were allocated to the control arm

<sup>e</sup>All participants received the intervention

## Scanxiety measurement

Anxiety measurements varied across the studies, with different measurement tools, variants of the same tool, and different range and thresholds applied to tools.

### Observational studies

The 47 observational studies (**Supplementary Table 3**) used a total of 81 measures of anxiety, with 30 studies using one measure only[15-19, 21, 22, 25-28, 30, 33, 34, 36, 39, 40, 43, 44, 46, 48-51, 53, 55-57, 59, 61], and 17 studies using at least two measures[20, 23, 24, 29, 31, 32, 35, 37, 38, 41, 42, 45, 47, 52, 54, 58, 60].

The most common measures used were: purposed-designed Likert scales (17 studies); the State-Trait Anxiety Inventory (STAI) (14 studies); the anxiety subscale of the Hospital Anxiety and Depression Scale (HADS) (9 studies); the Impact of Event Scale (IES) (6 studies); the Psychological Consequences Questionnaire (PCQ) (3 studies), the Cancer Worry Scale (3 studies), and; the Perceived Stress Scale (2 studies). There were 17 measures used by one study only[15, 20, 22, 26, 31, 32, 35, 52, 54, 56, 58, 60].

Likert scales were varied, with a numerical lower range limit of 0 or 1, and an upper range limit between 3 and 12[17, 20, 24, 25, 33, 40, 44, 46, 48, 50, 52, 53]. Seven studies used a descriptive range[21, 25, 27, 28, 33, 34, 55]. Two studies used both a numerical and a descriptive range[25, 33].

The STAI comprises State and Trait Anxiety subscales with a possible subscale range of 20 to 80. It has no validated anxiety threshold and is usually calculated as a sum of 4-point response options[72]. Included studies used and reported the STAI as a total score[37, 39], using one or both subscales[20, 23, 36, 37, 41, 42, 47, 51, 57, 59], or as a variant (e.g. STAI-6[32, 38, 58]). There were different ranges: none reported[47, 57]; no reported lower limit[41]; no reported upper limit[36]; 0 to 60[39, 51], or; based on a mean of individual item scores[20]. Some studies pre-specified an anxiety threshold of 39[57], 40[37, 41], 46[42], calculated based on the relationship between the anxiety and trait subscales[39], or based on investigator-determined categories[36]. One study used a different method to calculate scores (ie subtracting the points of reversed statements from direct statements, which were valued at 1, 2, 3 and 20, and then added to a constant of 50[36]).

The HADS Anxiety subscale has a range of 0 to 21 and a validated anxiety threshold of 11[73]. One study reported a range of 0 to 14[38], one study reported anxiety categories rather than a threshold[60], two studies reported an anxiety threshold of 8[41, 43] and one study reported an anxiety threshold of 10 (though there was overlap the 'tendency to anxiety' and 'anxiety' categories, classified as scores of 8 to 10 and 10 or more, respectively)[47].

The IES was used in its original form[30, 32, 38, 42, 58] or as a variant (IES-6[49]), and was reported as a total score[30, 32, 38, 49] or as Intrusion and Avoidance subscale scores[42, 58]. The two studies using subscale scores reported threshold levels of 20 or 21[42] and 8.5[58]. When using the PCQ, researchers used either the Emotional subscale[18] or the Negative Consequences subscale[24, 29]. The Cancer Worry Scale and the Perceived Stress Scale were used in original[45, 61] or variant[29, 54, 58] forms. The Symptom Checklist-90-Revised score could not be interpreted because the authors did not report a range[31], and a raw score or a transformed score could have been used[74].

**Supplementary Table 3.** Prevalence and severity of scanxiety

| Author               | Year     | Measurement                                              | Range (Anxiety threshold) | Timing of scanxiety assessment                                    | Prevalence (%)                           | Severity (Mean <sup>a</sup> )         | Pre- & post-scan comparison                               |
|----------------------|----------|----------------------------------------------------------|---------------------------|-------------------------------------------------------------------|------------------------------------------|---------------------------------------|-----------------------------------------------------------|
| Andolf[15]           | 1990     | Visual analogue scale                                    | 0-100 (NA)                | Post-scan: 1-3 years                                              | 81                                       | Median 3.5                            | NA                                                        |
| Bull[16]             | 1991     | HADS: Anxiety subscale                                   | 0-21 (≥11) <sup>b</sup>   | Pre-scan: specific timing NR                                      | 4.9                                      | 4.97                                  | Less severe post-scan scanxiety, p<0.001                  |
|                      |          |                                                          |                           | Post-scan: post-result, specific timing NR                        | 4                                        | 4.43                                  |                                                           |
| Peteet[17]           | 1992     | 10-point Likert scale                                    | 1-10 (NA)                 | Post-scan: specific timing NR                                     | NR                                       | First scan 5.5, Recent scan 3.5       | NA                                                        |
| Cockburn[18]         | 1994     | PCQ: Emotional subscale                                  | 0-15 (NA)                 | Pre-scan: day of scan                                             | NR                                       | <2                                    | No difference                                             |
|                      |          |                                                          |                           | Post-scan: pre-results, 1-week post-result & at 8 months          | NR                                       | <2                                    |                                                           |
| Ellman[19]           | 1995     | HADS: Anxiety subscale                                   | 0-21 (≥11)                | Pre-scan: day of scan                                             | 6                                        | NR                                    | NA                                                        |
| Sutton[20]           | 1995     | STAI: State Anxiety subscale                             | 1-4# (NA)                 | Pre-scan: at invitation to screening, specific timing NR          | NR                                       | Between 1.65 and 1.95                 | No significant differences scanxiety at any time point    |
|                      |          |                                                          |                           | Peri-scan: day of scan                                            | NR                                       |                                       |                                                           |
|                      |          |                                                          |                           | Post-scan: 9 months                                               | NR                                       |                                       |                                                           |
|                      |          | STAI: Trait Anxiety subscale                             | 1-4# (NA)                 | Pre-scan: at invitation to screening, specific timing NR          | NR                                       | Between 1.65 and 1.95                 | No significant differences in scanxiety at any time point |
|                      |          |                                                          |                           | Peri-scan: day of scan                                            | NR                                       |                                       |                                                           |
|                      |          |                                                          |                           | Post-scan: 9 months                                               | NR                                       |                                       |                                                           |
|                      |          | GHQ: Anxiety subscale                                    | 0-3 (NA)                  | Pre-scan: at invitation to screening, specific timing NR          | NR                                       | <1                                    | Less severe post-scan scanxiety, p<0.001                  |
|                      |          |                                                          |                           | Post-scan: 9 months                                               | NR                                       |                                       |                                                           |
| 3-point Likert scale | 1-3 (NA) | Pre-scan: at invitation to screening, specific timing NR | NR                        | <2                                                                | Less severe post-scan scanxiety, p<0.001 |                                       |                                                           |
|                      |          | Post-scan: 9 months                                      | NR                        |                                                                   |                                          |                                       |                                                           |
| Bakker[21]           | 1998     | 5-point Likert scale                                     | Descriptive range (NA)    | Post-scan: immediate & at 3 weeks                                 | 39-40                                    | Somewhat, very or extremely: 9 to 15% | NA                                                        |
| Gupta[22]            | 1999     | HSCL-25                                                  | 0-3 (NA)                  | Post-scan: specific timing NR                                     | 40                                       | Moderate to severe: 25%               | NA                                                        |
| Hafslund[23]         | 2000     | STAI: State Anxiety subscale                             | 20-80 (NA)                | Pre-scan: day of scan                                             | NR                                       | 35.5                                  | No statistical comparison reported                        |
|                      |          |                                                          |                           | Post-scan: day of scan                                            | NR                                       | 32.1                                  |                                                           |
|                      |          | STAI: Trait Anxiety subscale                             | 20-80 (NA)                | Pre-scan: day of scan                                             | NR                                       | 35.9                                  | No statistical comparison reported                        |
|                      |          |                                                          |                           | Post-scan: day of scan                                            | NR                                       | NR                                    |                                                           |
| Meystre-Agostoni[24] | 2001     | PCQ: Negative consequences subscale                      | 0-36 (NA)                 | Pre-scan: day of scan                                             | NR                                       | <1                                    | No statistical comparison reported                        |
|                      |          |                                                          |                           | Post-scan: pre- result, 2 weeks post-result & 8 weeks post-result | NR                                       | <2                                    |                                                           |
|                      |          | 6-point Likert scale                                     | 0-5 (NA)                  | Pre-scan: immediate                                               | 26                                       | <1                                    |                                                           |
|                      |          |                                                          |                           | Post-scan: pre-result, 2 weeks post-result & 8 weeks post-result  | NR                                       | <1                                    |                                                           |

|                   |      |                                                 |                        |                                                        |                               |                                                     |                                                                                    |
|-------------------|------|-------------------------------------------------|------------------------|--------------------------------------------------------|-------------------------------|-----------------------------------------------------|------------------------------------------------------------------------------------|
| Drossaert[25]     | 2002 | Composite 7-item score of 4-point Likert scales | 1-4 (NA)               | Baseline: 8 weeks post-first scan                      | NR                            | 1.6                                                 | No statistical comparison reported                                                 |
|                   |      |                                                 |                        | Pre-scan: 6 weeks (second & third scans)               | NR                            | 1.6 to 1.7                                          |                                                                                    |
|                   |      |                                                 |                        | Post-scan: 6 weeks (second & third scans)              | NR                            | 1.5                                                 |                                                                                    |
|                   |      |                                                 | Descriptive range (NA) | Baseline: 8 weeks post-first scan                      | NR                            | Moderate to severe: 10%                             | NA                                                                                 |
| Sandin[26]        | 2002 | HSCL-90-R: Anxiety subscale                     | 0-4 (NA)               | Pre-scan: day of scan                                  | NR                            | 0.41                                                | No statistical comparison reported                                                 |
|                   |      |                                                 |                        | Post-scan: 2 weeks                                     | NR                            | 0.28                                                |                                                                                    |
| Brunton[27]       | 2005 | 4-point Likert scale, 3 items                   | Descriptive range (NA) | Post-scan: within 4 years                              | 56-77                         | Quite or very: 11 to 28%                            | NA                                                                                 |
| Geurts[28]        | 2006 | 4-point Likert scale                            | 1-4 (NA)               | Peri-scan: specific timing NR                          | 61                            | Moderate to severe: 21%                             | NA                                                                                 |
| Tyndel[29]        | 2007 | PCQ: Negative consequences subscale             | 0-36 (NA)              | Pre-scan: 1 month                                      | NR                            | 5.1                                                 | Less severe post-scan scanxiety, p=0.000                                           |
|                   |      |                                                 |                        | Post-scan: 1-month post- result & 6-months post-result | NR                            | 3.8 to 4.2                                          |                                                                                    |
|                   |      | Cancer Worry Scale - Revised                    | 6-24 (NA)              | Pre-scan: 1 month                                      | NR                            | 11.0                                                | Less severe post-scan scanxiety, p=0.000                                           |
|                   |      |                                                 |                        | Post-scan: 1-month post- result & 6-months post-result | NR                            | 10.1 to 10.6                                        |                                                                                    |
| Bunge[30]         | 2008 | IES in low affective risk people                | 0-75 (NA)              | Pre-scan: 1 day                                        | NR                            | 5.6                                                 | Less severe post-scan scanxiety in both low and high affective risk groups, p<0.05 |
|                   |      |                                                 |                        | Post-scan: 6 months                                    | NR                            | 4.3                                                 |                                                                                    |
|                   |      | IES in high affective risk people               | 0-75 (NA)              | Pre-scan: 1 day                                        | NR                            | 14.7                                                |                                                                                    |
|                   |      |                                                 |                        | Post-scan: 6 months                                    | NR                            | 10.3                                                |                                                                                    |
| Brown Sofair[31]  | 2008 | Penn State Worry Questionnaire                  | 16-80 (60)             | Pre-scan: within 1 month                               | NR                            | 50.18                                               | No statistical comparison reported                                                 |
|                   |      |                                                 |                        | Post-scan: day of scan (post-result)                   | NR                            | NR                                                  |                                                                                    |
|                   |      | SCL-90-R: Anxiety subscale                      | NR (NA)                | Pre-scan: within 1 month                               | NR                            | 48.75                                               | No difference                                                                      |
|                   |      |                                                 |                        | Post-scan: day of scan (post-result)                   | NR                            | 42.07                                               |                                                                                    |
|                   |      | Individualized Questionnaire: Anxiety response  | 1-3 (2)                | Pre-scan: within 1 month                               | 35                            | NR                                                  | No statistical comparison reported                                                 |
|                   |      |                                                 |                        | Post-scan: day of scan (post-result)                   | 24                            | NR                                                  |                                                                                    |
| van den Bergh[32] | 2008 | STAI-6                                          | 20-80 (NA)             | Pre-scan: 1 day                                        | NR                            | 34.1                                                | Less severe post-scan scanxiety, p<0.01                                            |
|                   |      |                                                 |                        | Post-scan: within 1 week & at 6 months                 | NR                            | 32.7 to 34.3                                        |                                                                                    |
|                   |      | IES                                             | 0-75 (NA)              | Pre-scan: 1 day                                        | NR                            | 6.9                                                 | Less severe post-scan scanxiety, p<0.01                                            |
|                   |      |                                                 |                        | Post-scan: within 1 week & at 6 months                 | NR                            | 5.1 to 5.6                                          |                                                                                    |
|                   |      | EuroQol questionnaire: Anxiety subscale         | 1-3 (NA)               | Pre-scan: 1 day                                        | 23                            | NR                                                  | No statistical comparison reported                                                 |
|                   |      |                                                 |                        | Post-scan: 6 months                                    | NR                            | NR                                                  |                                                                                    |
| Westerterp[33]    | 2008 | 5-point Likert scale                            | 1-5 (NA)               | Post-scan (after both scans): 2 weeks                  | NR                            | CT 1.2, PET 1.4                                     | NA                                                                                 |
|                   |      |                                                 | Descriptive range (NA) | Post-scan (after both scans): 2 weeks                  | CT 13, PET 23                 | Moderate to severe: CT 4%, PET 10%                  | NA                                                                                 |
| Bastiaannet[34]   | 2009 | 5-point Likert scale                            | 1-5 (NA)               | Post-scan: 2-6 weeks after lymph node dissection       | Chest x-ray 20, CT 31, PET 36 | Moderate to severe: Chest X-ray 13%, CT 5%, PET: 9% | NA                                                                                 |
| Vierikko[35]      | 2009 | Health anxiety inventory                        | 0-24 (NA)              | Pre-scan: specific timing NR                           | NR                            | 6.7                                                 | Less severe post-scan scanxiety, p<0.001                                           |
|                   |      |                                                 |                        | Post-scan: 1 year                                      | NR                            | 5.8                                                 |                                                                                    |
|                   |      | Worry about lung cancer                         | 0-8 (NA)               | Pre-scan: specific timing NR                           | NR                            | 3.0                                                 | No difference                                                                      |



|                  |      |                                    |                                                                    |                                                      |                      |                                          |                                                                          |                                      |
|------------------|------|------------------------------------|--------------------------------------------------------------------|------------------------------------------------------|----------------------|------------------------------------------|--------------------------------------------------------------------------|--------------------------------------|
|                  |      |                                    |                                                                    | Post-scan: 1 year                                    | NR                   | 3.1                                      |                                                                          |                                      |
| Bolukbas[36]     | 2010 | STAI: State Anxiety subscale       | 0-NR (20-39 mild, 40-59 moderate, 60-79 severe, ≥ 80 help needed)# | Peri-scan: specific timing NR                        | NR                   | 46.2                                     | NA                                                                       |                                      |
| Thompson[37]     | 2010 | STAI                               | 40-160 (NA)                                                        | Post-scan: specific timing NR                        | 37                   | 65.8                                     | NA                                                                       |                                      |
|                  |      | STAI: State Anxiety subscale       | 20-80 (≥40)#                                                       | Post-scan: specific timing NR                        | NR                   | 30.4                                     | NA                                                                       |                                      |
|                  |      | STAI: Trait Anxiety subscale       | 20-80 (≥40)#                                                       | Post-scan: specific timing NR                        | NR                   | 35.4                                     | NA                                                                       |                                      |
| Hutton[38]       | 2011 | HADS: Anxiety subscale             | 0-14 (≥11)#                                                        | Baseline: 4 weeks pre-first scan                     | 20                   | 6.9                                      | No difference                                                            |                                      |
|                  |      |                                    |                                                                    | Pre-scan: day of each scan (for 5 scans)             | MRI 17, Mammogram 20 |                                          |                                                                          | MRI 5.2 to 6.5, Mammogram 5.0 to 6.5 |
|                  |      |                                    |                                                                    | Post-scan: 6 weeks (for 5 scans)                     | 10 to 13             |                                          |                                                                          | 5.1 to 5.9                           |
|                  |      | STAI-6                             | 20-80 (NA)                                                         | Pre-scan: day of scan (for 5 scans)                  | NR                   | MRI 10.8 to 12.1, Mammogram 10.1 to 11.3 | Less severe post-scan scanxiety for MRI (p<0.0005) & mammogram (p=0.002) |                                      |
|                  |      |                                    |                                                                    | Post-scan: day of scan (for 5 scans)                 | NR                   | MRI 9.6 to 10.7, Mammogram 9.7 to 10.5   |                                                                          |                                      |
|                  |      | IES                                | 0-75 (NA)                                                          | Post-scan: 6 weeks (for 5 scans)                     | NR                   | MRI 17.8 to 19.3, Mammogram 17.2 to 18.6 | NA                                                                       |                                      |
| Pifarre[39]      | 2011 | STAI                               | 0-60 for each subscale (state more than 10 than trait)#            | Pre-scan: day of scan                                | 68                   | NR                                       | NA                                                                       |                                      |
| Steinemann[40]   | 2011 | 7-point Likert scale               | 1-7 (NA)                                                           | Pre-scan: day of scan                                | NR                   | 4.1                                      | NA                                                                       |                                      |
| Yu[41]           | 2011 | HADS: Anxiety subscale             | 0-21 (≥8)#                                                         | Pre-scan: day of scan                                | 38                   | NR                                       | NA                                                                       |                                      |
|                  |      | STAI: State Anxiety subscale       | NR-80 (≥40)#                                                       | Pre-scan: day of scan                                | 46                   | 39.4                                     | NA                                                                       |                                      |
|                  |      | STAI: Trait Anxiety subscale       | NR-80 (≥40)#                                                       | Pre-scan: day of scan                                | 46                   | 39.9                                     | NA                                                                       |                                      |
|                  |      | Dichotomous reporting <sup>c</sup> | Yes/No (NA)                                                        | Pre-scan: day of scan                                | 41                   | NR                                       | NA                                                                       |                                      |
| Bredart[42]      | 2012 | STAI: State Anxiety subscale       | 20-80 (≥46)#                                                       | Pre-scan: 1 week                                     | NR                   | MRI 42.1, Mammogram 41.1                 | No statistical comparison reported                                       |                                      |
|                  |      |                                    |                                                                    | Post-scan: day of scan & between 15 days to 3 months | NR                   | MRI 34.9, 40.8, Mammogram 34.3, 38.8     |                                                                          |                                      |
|                  |      | IES: Intrusion subscale            | 0-35 (≥20)#                                                        | Pre-scan: 1 week                                     | NR                   | MRI 8.9, Mammogram 8.4                   | No statistical comparison reported                                       |                                      |
|                  |      |                                    |                                                                    | Post-scan: day of scan & between 15 days to 3 months | NR                   | MRI 8.5, Mammogram 7.7                   |                                                                          |                                      |
|                  |      | IES: Avoidance subscale            | 0-40 (≥21)#                                                        | Pre-scan: 1 week                                     | NR                   | MRI 12.1, Mammogram 9.8                  | No statistical comparison reported                                       |                                      |
|                  |      |                                    |                                                                    | Post-scan: day of scan & between 15 days to 3 months | NR                   | MRI 11.8, Mammogram 8.9                  |                                                                          |                                      |
| Hafslund[43]     | 2012 | HADS: Anxiety subscale             | 0-21 (≥8)#                                                         | Pre-scan: within 2 weeks                             | 15                   | 4.1                                      | NA                                                                       |                                      |
| Adams[44]        | 2014 | 4-point Likert scale               | 1-4 (NA)                                                           | Post-scan: day of scan (after each scan)             | NR                   | MRI 1.5, CT 1.8                          | NA                                                                       |                                      |
| Baena-Canada[45] | 2014 | HADS: Anxiety subscale             | 0-21 (≥11)                                                         | Post-scan: specific timing NR                        | 4                    | 1.86                                     | NA                                                                       |                                      |
|                  |      | Cancer Worry Scale                 | 6-24 (NA)                                                          | Post-scan: specific timing NR                        | NR                   | 9.4                                      | NA                                                                       |                                      |

|                      |           |                                        |                        |                                                          |                                           |                                                  |                                                                           |
|----------------------|-----------|----------------------------------------|------------------------|----------------------------------------------------------|-------------------------------------------|--------------------------------------------------|---------------------------------------------------------------------------|
| Andersson[46]        | 2015      | Sum of 3 items on 5-point Likert scale | 0-12 (NA)              | Post-scan: within four weeks                             | NR                                        | 4                                                | NA                                                                        |
| Elboga[47]           | 2015      | HADS: Anxiety subscale                 | 0-21 (≥10)             | Pre-scan: day of scan                                    | NR                                        | 9.2                                              | NA                                                                        |
|                      |           | STAI: State Anxiety subscale           | NR (NA)                | Pre-scan: day of scan                                    | NR                                        | 40.4                                             | NA                                                                        |
|                      |           | STAI: Trait Anxiety subscale           | NR (NA)                | Pre-scan: day of scan                                    | NR                                        | 46.6                                             | NA                                                                        |
| Hobbs[48]            | 2015      | 5-point Likert scale                   | 1-5 (NA)               | Post-scan (after both scans), specific timing NR         | Mammogram 17, MRI 44                      | NR                                               | NA                                                                        |
| Baum[49]             | 2016      | IES-6                                  | 0-24 (NA)              | Post-scan: specific timing NR                            | 83                                        | 6.4                                              | NA                                                                        |
| Abreu[50]            | 2017      | 10-point Likert scale                  | 1-10 (NA)              | Pre-scan: day of scan                                    | NR                                        | 6.4                                              | Less severe post-scan scanxiety, p=0.000                                  |
|                      |           |                                        |                        | Post-scan: day of scan                                   | NR                                        | 5.7                                              |                                                                           |
| Grilo[51]            | 2017      | STAI: State Anxiety subscale           | 0-60 (NA)              | Pre-scan: day of scan                                    | NR                                        | 31.1                                             | More severe post-scan scanxiety, p=0.000                                  |
|                      |           |                                        |                        | Post-scan: day of scan                                   | NR                                        | 33.0                                             |                                                                           |
| Evans[52]            | 2018      | GHQ-12                                 | 0-12 (≥4)              | Peri-scans: specific timing NR                           | 42                                        | NR                                               | NA                                                                        |
|                      |           | 7-point Likert scale                   | 1-7 (NA)               | Post-scan: 1 month                                       | NR                                        | MRI 2.5, CT or PET/CT 2.2                        | NA                                                                        |
| Goense[53]           | 2018      | 5-point Likert scale                   | 1-5 (NA)               | Post-scan (after both scans): day of scan                | NR                                        | MRI 1.0, PET 1.0                                 | NA                                                                        |
| Hall[54]             | 2018      | Generalized Anxiety Disorder 2-item    | 0-6 (≥3)               | Peri-scan: specific timing NR                            | 26                                        | 1.62                                             | NA                                                                        |
|                      |           | Perceived Stress Scale 4               | 0-16 (NA)              | Peri-scan: specific timing NR                            | NR                                        | 5.14                                             | NA                                                                        |
| Derry[55]            | 2019      | 4-point Likert scale                   | Descriptive range (NA) | Peri-scan: pre-result                                    | NR                                        | 'A great deal' or 'completely': 23%              | NA                                                                        |
| Soriano[56]          | 2019      | PROMIS Anxiety Short Form              | 1-5 (NA)               | Pre-scan: two weeks                                      | NR                                        | 1.55                                             | NA                                                                        |
| Taghizadeh[57]       | 2019      | STAI: State Anxiety subscale           | NR (39)                | Baseline                                                 | NR                                        | 30.9                                             | More severe post-scan scanxiety, p<0.001                                  |
|                      |           |                                        |                        | Post-scan: one-month post-result & at 12 months          | NR                                        | 33.1, 31.7                                       |                                                                           |
| Bancroft[58]         | 2020      | HADS: Anxiety subscale                 | 0-21 (11)              | Baseline                                                 | Carriers <sup>d</sup> : 14<br>Controls: 7 | Carriers: 6.2<br>Controls: 4.9                   | No difference in prevalence<br>Less severe post-scan in carriers (p=0.04) |
|                      |           |                                        |                        | Post-scan: pre-results, at 12 weeks, 26 weeks & 52 weeks | Carriers: 5 to 14<br>Controls: 2 to 7     | Carriers: 5.3 to 5.9<br>Controls: 4.1 to 4.6     |                                                                           |
|                      |           | Cancer Worry Scale – Revised           | 8-32 (NA)              | Baseline                                                 | NR                                        | Carriers: 14.4<br>Controls: 12.2                 | No difference                                                             |
|                      |           |                                        |                        | Post-scan: at 12 weeks, 26 weeks & 52 weeks              | NR                                        | Carriers: 13.6 to 14.7<br>Controls: 11.9 to 12.1 |                                                                           |
|                      |           | IES-cancer: Intrusion subscale         | 0-35 (8.5)             | Post-scan: pre-results, at 12 weeks, 26 weeks & 52 weeks | Carriers: 35 to 58<br>Controls: 5 to 13   | Carriers: 8.3 to 11.4<br>Controls: 1.7 to 3.0    | NA                                                                        |
|                      |           | IES-cancer: Avoidance subscale         | 0-40 (8.5)             | Post-scan: pre-results, at 12 weeks, 26 weeks & 52 weeks | Carriers: 55 to 64<br>Controls: 12 to 37  | Carriers: 9.9 to 13.3<br>Controls: 2.6 to 7.0    | NA                                                                        |
|                      |           | IES-MRI: Intrusion subscale            | 0-35 (8.5)             | Post-scan: at 12 weeks, 26 weeks & 52 weeks              | Carriers: 4 to 7<br>Controls: 0 to 3      | Carriers: 1.2 to 3.1<br>Controls: 0.1 to 0.5     | NA                                                                        |
|                      |           | IES-MRI: Avoidance subscale            | 0-40 (8.5)             | Post-scan: at 12 weeks, 26 weeks & 52 weeks              | Carriers: 14<br>Controls: 8               | Carriers: 1.8<br>Controls: 2.8                   | NA                                                                        |
| STAI-6               | 6-24 (NA) | Pre-scan: day of scan                  | NR                     | Carriers: 7.2<br>Controls: 7.3                           | NA                                        |                                                  |                                                                           |
| Health Questionnaire | 0-14 (NA) | Baseline                               | NR                     | Carriers: 7.0<br>Controls: 6.8                           | No difference                             |                                                  |                                                                           |

1  
2  
3  
4  
5  
6  
7  
8  
9  
10  
11  
12  
13  
14  
15  
16  
17  
18  
19  
20  
21  
22  
23  
24  
25  
26  
27  
28  
29  
30  
31  
32  
33  
34  
35  
36  
37  
38  
39  
40  
41  
42  
43  
44  
45  
46  
47

|              |      |                              |                                                        |                                                          |    |                                          |                                                                                |
|--------------|------|------------------------------|--------------------------------------------------------|----------------------------------------------------------|----|------------------------------------------|--------------------------------------------------------------------------------|
|              |      |                              |                                                        | Post-scan: pre-results, at 12 weeks, 26 weeks & 52 weeks | NR | Carriers: 8.1, 7.1<br>Controls: 6.9, 7.7 |                                                                                |
| Grilo[59]    | 2020 | STAI: State Anxiety subscale | 20-80 (NA)                                             | Pre-scan: day of scan                                    | NR | Bone scan: 51.75<br>PET/CT: 44.76        | Less severe post-scan scanxiety for both: Bone scan. p=0.02<br>PET/CT, p<0.001 |
|              |      |                              |                                                        | Post-scan: day of scan                                   | NR | Bone scan: 36.70<br>PET/CT: 38.82        |                                                                                |
| Morreale[60] | 2020 | Distress thermometer         | 0-10 (4)                                               | Peri-scan: day of scan                                   | NR | 3.73                                     | No statistical comparison                                                      |
|              |      |                              |                                                        | Post-scan: one-week post-result                          | NR | 3.91                                     |                                                                                |
|              |      | HADS: Anxiety subscale       | 0-21 (0-7 none, 8-10 mild, 11-14 moderate, 15-21 high) | Peri-scan: day of scan                                   | NR | 6.12                                     | No statistical comparison                                                      |
|              |      |                              |                                                        | Post-scan: one-week post-result                          | NR | 5.32                                     |                                                                                |
| Paiella[61]  | 2020 | Perceived Stress Scale       | 0-40 (15-18 moderate, ≥ 19 high)                       | Post-scan: pre-result                                    | NR | 14.8                                     | NA                                                                             |

NA not applicable, NR not reported, HADS Hospital Anxiety and Depression Scale, PCQ Psychological Consequences Questionnaire, STAI State-Trait Anxiety Inventory, GHQ General Health Questionnaire, HSCL Hopkins Symptom Checklist, IES Impact of Event Scale, SCL-90-R Symptom Checklist-90-Revised, HSCL-90-R Hopkins Symptom Checklist 90-Revised, PROMIS Patient-Reported Outcomes Measurement Information System, CT computed tomography, PET positron emission tomography, MRI magnetic resonance imaging  
All percentages were rounded to the nearest whole number

<sup>a</sup>Unless otherwise described

<sup>b</sup>This study did not specify an anxiety threshold; however, the Anxiety subscale of the Hospital Anxiety and Depression Scale has validated thresholds. These thresholds were included in this table

<sup>c</sup>Dichotomous reporting assumed given description of question (self-perception of anxiety) and results "40.5% of the patients considered themselves to be anxious"[41]

<sup>d</sup>This study included participants who were TP53 mutation carriers, and population controls

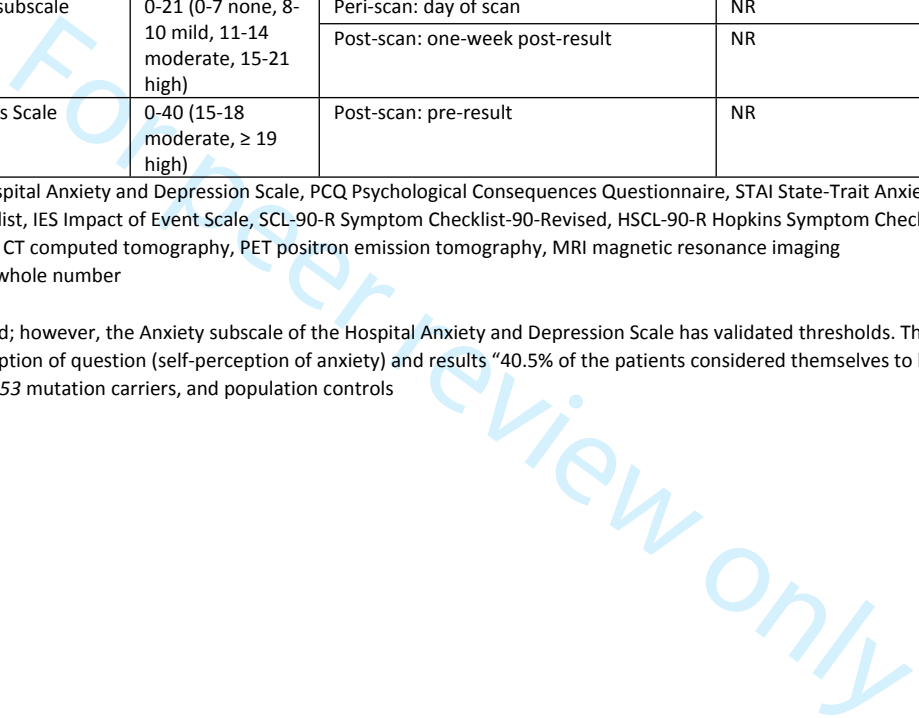

## Intervention studies

The ten intervention studies (**Table 4**) used 19 measures of anxiety, with five studies using one measure only[62, 66, 67, 69, 70], and five studies at least two[63-65, 68, 71]. The measures included subscales of the STAI (7 studies), Likert scales (5 studies), a variant of the Psychological Consequences Questionnaire (1 study[68]) and the Crown Crisp Experimental Index (1 study[65]).

Likert scales were varied, with a lower range limit of 0 or 1, and an upper range limit between 5 and 10[62, 63, 69-71]. The STAI was used and reported using one or both subscales[63-65, 67, 68, 71], or as a variant (8-item STAI[66]). There was variation from the usual STAI parameters, with studies using a different range (i.e. not reported[63, 65], 0 to 60[64], or 18 to 32[66]) or pre-specified anxiety thresholds of 40[68] or 16[66].

## Scanxiety outcomes

Prevalence and severity of scanxiety for each study are provided in **Supplementary Table 3**. Summary statistics for prevalence and severity were not calculated due to heterogeneity in the type and timing of measurement between the studies.

### Prevalence of scanxiety

Twenty-four of the 47 studies reported the prevalence of scanxiety. The prevalence of scanxiety ranged between 0% and 64% across the 16 measures with pre-specified anxiety thresholds[16, 19, 31, 38, 41, 43, 45, 52, 54, 58], though eight of these measures came from only two studies[41, 58]. The prevalence of scanxiety ranged between 13% and 83% using the 14 measures without pre-specified anxiety thresholds[15, 21, 22, 24, 27, 28, 32-34, 37, 39, 41, 48, 49].

There were insufficient numbers to compare the prevalence of scanxiety using measures with pre-specified anxiety thresholds of people having scans for screening (11 measures[16, 31, 38, 43, 45, 54, 58]), reasons other than screening (four measures[41, 52]) and for screening or non-screening reasons (1 measure[19]). When no threshold was reported, the prevalence of scanxiety had a similar range (screening 23% to 81%, five measures[15, 21, 24, 27, 32]; reasons other than screening 14% to 83%, eight measures[28, 33, 34, 37, 39, 41, 48, 49]; either screening or reasons other than screening (40%, one measure[22]).

### Severity of scanxiety

Severity of scanxiety was reported in 44 of 47 observational studies. Mean severity scores were low in almost all measures which quantitatively measured scanxiety (54/62, 87%).

**Table 4.** Effect of interventions to reducing scanxiety

| First author                                                                | Year      | Intervention                                                                                                                                                                                                           | Scanxiety measurement                  | Range (Anxiety threshold) | Timing of scanxiety assessment                                                    | Impact of intervention on scanxiety                            | P-value |                                                                                                |                                             |            |                                                        |                                             |       |
|-----------------------------------------------------------------------------|-----------|------------------------------------------------------------------------------------------------------------------------------------------------------------------------------------------------------------------------|----------------------------------------|---------------------------|-----------------------------------------------------------------------------------|----------------------------------------------------------------|---------|------------------------------------------------------------------------------------------------|---------------------------------------------|------------|--------------------------------------------------------|---------------------------------------------|-------|
| Mainiero[62]                                                                | 2001      | Arm A: an educational video about breast cancer and mammography<br>Arm B: an entertaining movie (from the 1940s to 1960s)                                                                                              | 6-point Likert score                   | 0-5 (NA)                  | Pre-scan: immediate<br>Post-scan: immediate                                       | No difference                                                  | NR      |                                                                                                |                                             |            |                                                        |                                             |       |
| Domar[63]                                                                   | 2005      | Arm A: relaxation audiotape, or;<br>Arm B: music audiotape, or;<br>Arm C: control (blank audiotape)                                                                                                                    | STAI: State Anxiety subscale           | NR (NA)                   | Pre-scan: immediate                                                               | No difference<br>Arm A v Arm B v Arm C: 34.8 v 33.6 v 33.2     | 0.18    |                                                                                                |                                             |            |                                                        |                                             |       |
|                                                                             |           |                                                                                                                                                                                                                        |                                        |                           | Post-scan: immediate                                                              | No difference<br>Arm A v Arm B v Arm C: 30.4 v 30.9 v 33.2     | 0.78    |                                                                                                |                                             |            |                                                        |                                             |       |
|                                                                             |           |                                                                                                                                                                                                                        | STAI: Trait Anxiety subscale           | NR (NA)                   | Pre-scan: immediate                                                               | No difference<br>Arm A v Arm B v Arm C: 32.6 v 32.7 v 32.5     | 0.99    |                                                                                                |                                             |            |                                                        |                                             |       |
|                                                                             |           |                                                                                                                                                                                                                        | 11-point Likert scale                  | 1-10 (NA)                 | Post-scan                                                                         | No difference<br>Arm A v Arm B v Arm C: 2.6 v 3.2 v 2.8        | 0.43    |                                                                                                |                                             |            |                                                        |                                             |       |
|                                                                             |           |                                                                                                                                                                                                                        |                                        |                           | Post-scan: immediate                                                              | NR                                                             | NR      |                                                                                                |                                             |            |                                                        |                                             |       |
| Fernandez-Feito[64]                                                         | 2005      | Arm A: A protocolised nursing intervention (information and emotional support) and usual care, or;<br>Arm B: Usual care alone                                                                                          | STAI: State Anxiety subscale           | 0-60 (NA)                 | Pre-scan: immediate (post-intervention)                                           | Less severe                                                    | <0.001  |                                                                                                |                                             |            |                                                        |                                             |       |
|                                                                             |           |                                                                                                                                                                                                                        |                                        |                           |                                                                                   | Less severe if fear of cancer present                          | 0.002   |                                                                                                |                                             |            |                                                        |                                             |       |
|                                                                             |           |                                                                                                                                                                                                                        |                                        |                           |                                                                                   | Less severe if no fear of cancer present                       | 0.003   |                                                                                                |                                             |            |                                                        |                                             |       |
|                                                                             |           |                                                                                                                                                                                                                        |                                        |                           |                                                                                   | No difference if fear of cancer outcome present                | 0.09    |                                                                                                |                                             |            |                                                        |                                             |       |
|                                                                             |           |                                                                                                                                                                                                                        | Less severe if no fear of scan outcome | <0.001                    |                                                                                   |                                                                |         |                                                                                                |                                             |            |                                                        |                                             |       |
| STAI: Trait Anxiety subscale                                                | 0-60 (NA) | Pre-scan: immediate (post-intervention)                                                                                                                                                                                | No difference                          | 0.34                      |                                                                                   |                                                                |         |                                                                                                |                                             |            |                                                        |                                             |       |
| Caruso[65]                                                                  | 2006      | Arm A: routine information and 45 minutes of informative-emotive psychological support with a psychologist, or;<br>Arm B: routine information                                                                          | Crown Crisp Experimental Index         | NR (0-96)                 | Pre-scan: immediate (post-intervention)                                           | Less severe<br>Arm A v Arm B: 39.4 v 42.3                      | 0.03    |                                                                                                |                                             |            |                                                        |                                             |       |
|                                                                             |           |                                                                                                                                                                                                                        |                                        |                           |                                                                                   | STAI: State Anxiety subscale                                   | NR (NA) | Pre-scan: immediate (post-intervention)                                                        | No difference<br>Arm A v Arm B: 57.7 v 58.6 | 0.77       |                                                        |                                             |       |
|                                                                             |           |                                                                                                                                                                                                                        | STAI: Trait Anxiety subscale           | NR (NA)                   | Post-scan: immediate                                                              | Less severe                                                    | 0.048   |                                                                                                |                                             |            |                                                        |                                             |       |
| Vogel[66]                                                                   | 2012      | Arm A: Uptake room with an audio-visual installation involving a video of nature scenes on a 119cm television, dynamic lighting & ambient electronic music<br>Arm B: Uptake room without the audio-visual installation | 8-item STAI                            | 18-32 (≥16)               | Pre-scan: immediately before & immediately after fluorodeoxyglucose uptake period | Less severe<br>Arm A v Arm B: reduction by 2.39 v 1.02         | 0.04    |                                                                                                |                                             |            |                                                        |                                             |       |
|                                                                             |           |                                                                                                                                                                                                                        |                                        |                           |                                                                                   | Acuff[67]                                                      | 2014    | Arm A: Receive a hand-held device to contact imaging staff during the scan<br>Arm B: No device | STAI: State Anxiety subscale                | 20-80 (NA) | During scan: immediately before completion of the scan | Less severe<br>Arm A v Arm B: 22.87 v 26.45 | 0.014 |
|                                                                             |           |                                                                                                                                                                                                                        |                                        |                           |                                                                                   | Less severe if previous PET/CT<br>Arm A v Arm B: 20.78 v 24.64 |         |                                                                                                |                                             |            |                                                        | 0.023                                       |       |
| No difference if first time PET/CT<br>Arm A v Arm B: 23.09 v 27.25, p=0.249 | 0.249     |                                                                                                                                                                                                                        |                                        |                           |                                                                                   |                                                                |         |                                                                                                |                                             |            |                                                        |                                             |       |

|              |      |                                                                                                                                       |                                               |             |                                                                                    |                                                               |              |
|--------------|------|---------------------------------------------------------------------------------------------------------------------------------------|-----------------------------------------------|-------------|------------------------------------------------------------------------------------|---------------------------------------------------------------|--------------|
| Raz[68]      | 2014 | Arm A: multimedia education session and usual care, or;<br>Arm B: Usual care                                                          | STAI: State Anxiety subscale                  | 20-80 (≥40) | Pre-scan: within 2 weeks<br>Post-scan: immediate, at 1 week & 3-7 months post-scan | No difference at any time point                               | NR           |
|              |      |                                                                                                                                       | STAI: Trait Anxiety subscale                  | 20-80 (≥40) |                                                                                    | No difference at any time point                               | NR           |
|              |      |                                                                                                                                       | PCQ: Lung Cancer adaptation, Anxiety subscale | 0-18 (NR)   |                                                                                    | No difference at any time point                               | 0.11 to 0.76 |
| Zavotsky[69] | 2014 | Arm A: music of their choice played via dock during the scan<br>Arm B: no music                                                       | 11-point Likert scale                         | 0-10 (NA)   | Post-scan: immediate                                                               | No difference<br>Arm A v Arm B: 2.36 v 2.98                   | 0.21         |
| Ashton[70]   | 2019 | All participants: 10-minute shoulder & neck massage and/or hand massage before, during or after imaging, or between two imaging tests | 11-point Likert scale                         | 0-10 (NA)   | Post-intervention (pre- or post-scan)                                              | 81% had a reduction in anxiety following massage <sup>a</sup> | <0.01        |
| Lorca[71]    | 2019 | Arm A: mindfulness meditation<br>Arm B: routine care                                                                                  | STAI: State Anxiety subscale                  | NR (NA)     | Post-scan: immediate                                                               | Less severe<br>Arm A v Arm B: 10.47 v 29.07                   | 0.000        |
|              |      |                                                                                                                                       | STAI: Trait Anxiety subscale                  | NR (NA)     |                                                                                    | No difference                                                 | NS           |
|              |      |                                                                                                                                       | 11-item Likert scale                          | 0-10 (NA)   |                                                                                    | Less severe<br>Arm A v Arm B, 1.07 v 5.70                     | 0.000        |

NR not reported, STAI State-Trait Anxiety Inventory, PCQ Psychological Consequences Questionnaire

<sup>a</sup>Mean scores for overall study population not provided

The mean severity scores were below pre-specified anxiety thresholds on 17 of the 19 measures where a threshold was reported[16, 31, 37, 38, 41-43, 45, 47, 54, 57, 58]. The two exceptions were observed in a study comparing people with *TP53* mutations ('carriers') to controls, with all participants undergoing screening scans. In carriers, mean scores were maximally 11.4 (IES Intrusion subscale, threshold 8.5), and 13.3 (IES Avoidance subscale, threshold 8.5). Mean severity scores for controls were below the thresholds[58].

Of the 43 measures without a pre-specified threshold, the majority had numerically low mean scores[15, 18, 20, 23-26, 29, 30, 32, 33, 35, 37, 38, 44-46, 49, 52-54, 56, 58, 60, 61]. There were six exceptions, which reported maximal mean severity scores of: 5.5 out of 10 (Likert scale)[17]; 6.4 out of 10 (Likert scale)[50]; 4.1 out of 7 (Likert scale)[40], 33 out of 60 (STAI State Anxiety subscale)[51], 8.1 out of 14 (Health Questionnaire)[58], and; 51.75 out of 80 (STAI)[59]. Four of these scores occurred in studies where scans were performed for reasons other than screening[17, 50, 51, 59], one allowed scans for diagnosis or screening[40], and one allowed scans for screening only[58].

Eight measures used a descriptive range of severity, with more severe levels of scanxiety in 4% to 28% of participants[21, 22, 25, 27, 28, 33, 34, 55].

Four measures could not be interpreted because they failed to report a range and anxiety threshold[31, 36, 47].

### Scanxiety before and after a scan

Of the 20 studies that reported a pre- and post-scan scanxiety measurement, 14 studies reported a statistical comparison[16, 18, 20, 29-32, 35, 38, 50, 51, 57-59] and six did not[23-26, 42, 60](**Supplementary Table 3**). There was variation in the timing of scanxiety measurement before a scan from four weeks before the scan until immediately before the scan, and after a scan from immediately after the scan until one year after the scan. Five studies reported a post-scan reduction in scanxiety severity compared to pre-scan levels[16, 29, 30, 32, 50, 59]. Two studies reported an increase in post-scan scanxiety severity[51, 57], and two studies no difference in pre- and post-scan scanxiety severity[18, 31].

Four studies reported mixed findings on the change in scanxiety severity across different measures (**Table 5**).

**Table 5.** Studies with discrepant results on pre- and post-scan scanxiety severity using different measures

| First author | Measurement tool                                                       |                                                              |
|--------------|------------------------------------------------------------------------|--------------------------------------------------------------|
|              | Post-scan reduction in scanxiety                                       | No difference in pre- or post-scan scanxiety                 |
| Sutton[20]   | General Health Questionnaire: Anxiety subscale<br>3-point Likert scale | STAI: State Anxiety subscale<br>STAI: Trait Anxiety subscale |
| Vierikko[35] | Health Anxiety Inventory                                               | Worry about lung cancer                                      |
| Hutton[38]   | 6-item STAI                                                            | HADS: Anxiety subscale                                       |
| Bancroft[58] | HADS: Anxiety subscale                                                 | Cancer Worry Scale – Revised<br>Health Questionnaire         |

STAI: State Trait Anxiety Inventory, HADS: Hospital Anxiety and Depression Scale

Although Bancroft *et al.*[58] reported a reduction in scanxiety severity using HADS (anxiety subscale), there was no difference in scanxiety prevalence.

For most measures where a statistically significant difference in pre-scan and post-scan scanxiety was reported, the absolute differences in mean scores were numerically low. The exception was a 15-point reduction in scanxiety severity using the STAI (range 20-80) in people having a bone scan for non-screening reasons[59].

### Contributing factors to scanxiety

Multiple comparisons were made between scanxiety and possible contributing factors across the included studies (Table 6).

**Table 6.** Contributing factors to scanxiety

| Variable        | Comparison                                                | Effect on scanxiety         | Studies | n    | P-value                                                                               |
|-----------------|-----------------------------------------------------------|-----------------------------|---------|------|---------------------------------------------------------------------------------------|
| Age             | Younger v older                                           | More prevalent              | 1       | 398  | 0.008[41]                                                                             |
|                 |                                                           | No difference in prevalence | 2       | 338  | NS[28, 50]                                                                            |
|                 |                                                           | More severe                 | 5       | 1883 | 0.005[45], <0.01[20], <0.01 (for screening)[70], 0.01[24], NR[63]                     |
|                 |                                                           | No difference in severity   | 11      | 6804 | NS[22, 27, 36, 37, 42, 43, 49, 51, 59, 62], NS (for surveillance)[70]                 |
| Gender          | Men v women                                               | More prevalent              | 1       | 200  | <0.001[39]                                                                            |
|                 |                                                           | Less prevalent              | 1       | 298  | 0.021[41]                                                                             |
|                 |                                                           | No difference in prevalence | 1       | 106  | NS[28]                                                                                |
|                 |                                                           | More severe                 | 1       | 232  | 0.033 (post-scan)[50]                                                                 |
|                 |                                                           | Less severe                 | 2       | 1381 | 0.000[47], <0.05[57]                                                                  |
|                 |                                                           | No difference in severity   | 5       | 580  | NS[37, 49, 51, 59], NS (pre-scan)[50]                                                 |
| Ethnicity       | White v other races                                       | More severe                 | 1       | 143  | NR[63]                                                                                |
|                 | Maori & Pacific Islanders v New Zealand European or Asian | More severe                 | 1       | 584  | <0.001[27]                                                                            |
|                 | Any                                                       | No difference in severity   | 5       | 1454 | NS[22, 24, 37, 40, 49]                                                                |
| Education       | Lower v higher                                            | More prevalent              | 1       | 398  | <0.001[41]                                                                            |
|                 |                                                           | No difference in prevalence | 2       | 338  | NS[28, 50]                                                                            |
|                 |                                                           | More severe                 | 8       | 7400 | 0.003[62], 0.007[36], <0.01[22], ≤0.01[42], 0.012[24], 0.018[27], 0.04[43], <0.05[23] |
|                 |                                                           | No difference in severity   | 6       | 591  | NS[37, 49, 51, 59, 63, 69]                                                            |
| Employment      | Unemployed v employed                                     | More prevalent              | 1       | 398  | 0.046[41]                                                                             |
|                 |                                                           | More severe                 | 3       | 5056 | 0.01[43], 0.05[23], ≤0.05[42]                                                         |
|                 |                                                           | No difference in severity   | 2       | 654  | NS[27, 37]                                                                            |
| Income          | Higher v lower                                            | No difference in severity   | 3       | 757  | NS[27, 37, 49]                                                                        |
| Marital status  | Married or de facto v single                              | More severe                 | 1       | 637  | ≤0.01 (using IES - Intrusion subscale)[42]                                            |
|                 |                                                           | No difference in severity   | 5       | 1790 | NS[24, 36, 37, 49], NS (using STAI - State anxiety subscale)[42]                      |
| Children        | Children v no children                                    | No difference in severity   | 3       | 5206 | NS[24, 37, 43]                                                                        |
| Smoking status  | Current v non-smoking <sup>a</sup>                        | More severe                 | 3       | 4562 | <0.001[43, 54], 0.031[47]                                                             |
|                 |                                                           | No difference in severity   | 2       | 330  | NS[40, 49]                                                                            |
| Reason for scan | Diagnostic v screening                                    | More severe                 | 3       | 1104 | 0.007[41], 0.047[36], NR[62]                                                          |
|                 | Staging or surveillance v monitoring                      | More severe                 | 1       | 200  | <0.001[39]                                                                            |
|                 | Lower v higher referral clarity                           | More severe                 | 1       | 169  | 0.048[54]                                                                             |
|                 | Any                                                       | No difference in severity   | 3       | 480  | NS[22, 50, 51]                                                                        |
| Type of scan    | MRI v mammogram                                           | More severe                 | 1       | 49   | 0.009[48]                                                                             |
|                 |                                                           | Less severe                 | 1       | 637  | NR[42]                                                                                |



|                          |                                                   |                             |    |                                                                                                                                                                       |                                                                                                                         |
|--------------------------|---------------------------------------------------|-----------------------------|----|-----------------------------------------------------------------------------------------------------------------------------------------------------------------------|-------------------------------------------------------------------------------------------------------------------------|
|                          | CT v MRI                                          | More severe                 | 1  | 36                                                                                                                                                                    | 0.007[44]                                                                                                               |
|                          |                                                   | Less severe                 | 1  | 115                                                                                                                                                                   | NR[52]                                                                                                                  |
|                          | PET v CT                                          | More severe                 | 1  | 82                                                                                                                                                                    | 0.01[33]                                                                                                                |
|                          | Nuclear medicine scan v non-nuclear medicine scan | More severe                 | 1  | 398                                                                                                                                                                   | 0.004[41]                                                                                                               |
|                          | MRI v PET/CT                                      | No difference in severity   | 2  | 142                                                                                                                                                                   | NS[52, 53]                                                                                                              |
|                          | CT v PET v chest X-ray                            | No difference in severity   | 1  | 59                                                                                                                                                                    | NS[34]                                                                                                                  |
|                          | Bone scan v PET scan                              | More severe                 | 1  | 94                                                                                                                                                                    | <0.001 (post-scan)[59]                                                                                                  |
|                          |                                                   | No difference in severity   | 1  | 94                                                                                                                                                                    | NS (pre-scan)[59]                                                                                                       |
| Scan-naïve               | First v subsequent scans                          | More prevalent              | 1  | 398                                                                                                                                                                   | 0.001[41]                                                                                                               |
|                          |                                                   | No difference in prevalence | 1  | 200                                                                                                                                                                   | NS[39]                                                                                                                  |
|                          |                                                   | More severe                 | 5  | 3796                                                                                                                                                                  | <0.0005[38], <0.01[25], <0.02[19], <0.05[67], NR[66]                                                                    |
|                          |                                                   | Less severe                 | 1  | 93                                                                                                                                                                    | 0.038[36]                                                                                                               |
|                          |                                                   | No difference in severity   | 6  | 2491                                                                                                                                                                  | NS[24, 27, 50, 51, 59, 62]                                                                                              |
| Pain                     | Pain v no pain during scan                        | More severe                 | 6  | 4291                                                                                                                                                                  | <0.0001[25], <0.001[27], 0.001[62], <0.01[23, 69] <0.05[22]                                                             |
| Risk of cancer           | Past history v no past history of cancer          | More severe                 | 2  | 864                                                                                                                                                                   | ≤0.001[42], <0.05[40]                                                                                                   |
|                          |                                                   | Less severe                 | 1  | 434                                                                                                                                                                   | 0.013[45]                                                                                                               |
|                          |                                                   | No difference in severity   | 3  | 1206                                                                                                                                                                  | NS[15, 24, 58]                                                                                                          |
|                          | Family history v no family history of cancer      | More severe                 | 1  | 584                                                                                                                                                                   | 0.002[27]                                                                                                               |
|                          |                                                   | No difference in severity   | 3  | 1255                                                                                                                                                                  | NS[15, 24, 36]                                                                                                          |
|                          | Mutation carrier v not a carrier                  | More severe                 | 1  | 88                                                                                                                                                                    | <0.05 (three comparisons, using IES cancer – Intrusion and Avoidance subscales, and post-scan Health Questionnaire)[58] |
| No difference            |                                                   | 1                           | 88 | NS (five comparisons, using HADS- Anxiety subscale, Cancer Worry Scale – Revised, IES MRI – Intrusion and Avoidance subscales, and pre-scan Health Questionnaire)[58] |                                                                                                                         |
|                          | Higher, not otherwise specified v lower           | More severe                 | 1  | 70                                                                                                                                                                    | <0.05[37]                                                                                                               |
| Perceived risk of cancer | Higher v lower                                    | More severe                 | 3  | 1545                                                                                                                                                                  | <0.001[27], ≤0.001[42], <0.01[30]                                                                                       |

NS not significant, NR not reported, IES Impact of Event Scale, STAI State Trait Anxiety Inventory, HADS Hospital Anxiety and Depression Scale, MRI Magnetic Resonance Imaging

\*One study compared current smokers v former smokers[54], and one study compared current and former smokers v never smokers[49]

In summary, higher scanxiety severity was associated with people with:

- Lower education (compared to higher education, eight of 14 studies[22-24, 27, 36, 37, 42, 43, 49, 51, 59, 62, 63, 69]);
- A history of smoking (compared to non-smoking, three of five studies[40, 43, 47, 49, 54]);
- Higher pain levels during the scan (compared to no pain, all six studies[22, 23, 25, 27, 62, 69]);
- Higher perceived risk of cancer (compared to lower perceived risk of cancer, all three studies[27, 30, 42]), and;
- Diagnostic scans (compared to screening scans, all three studies[36, 41, 62])

The prevalence or severity of scanxiety was not consistently affected by age (13 of 19 comparisons[20, 22, 24, 27, 28, 36, 37, 41-43, 45, 49-51, 59, 62, 63, 70]), gender (six of 11 comparisons[28, 37, 39, 41, 47, 49-51, 57, 59]), ethnicity (five of seven comparisons[22, 24, 27, 37, 40, 49, 63]), income (all three comparisons[27, 37, 49]), marital status (five of six comparisons[24, 36, 37, 42, 49]) or having children (all three comparisons[24, 37, 43]).

Inconclusive results occurred in the following comparisons:

- Employment (unemployed compared to employed, four of six comparisons[23, 27, 37, 41-43])
- Scan-naivety (first scan compared to subsequent scans, six of 13 comparisons[19, 24, 25, 27, 36, 38, 39, 41, 50, 51, 62, 66, 67])
- Risk of cancer (higher compared to lower risk of cancer, seven of 19 comparisons[15, 24, 27, 36, 37, 40, 42, 45, 58])

Although nine studies reported differences in scanxiety between different imaging modalities, the number of comparisons between specific scans were insufficient to draw conclusions[33, 34, 41, 42, 44, 48, 52, 53, 59].

### **Interventions that reduce scanxiety**

Five of the 10 intervention studies showed a reduction in scanxiety compared to controls[64-67, 71]. Four studies reported no difference in scanxiety between the intervention arms[62, 63, 68, 69]. The study where all participants received the same intervention showed a reduction in anxiety[70]. Details of these results are listed in **Table 4**.

Both multi-faceted interventions studies incorporating education and emotional or psychological support showed a reduction in scanxiety[64, 65].

Of the six studies with relaxation, distraction and/or meditation components, three studies showed a reduction in scanxiety[66, 70, 71], while three studies did not[62, 63, 69].

Interventions with only educational components did not show a reduction in scanxiety[62, 68].

A reduction in scanxiety severity was also observed when a hand-held device was available to communicate with radiology staff. This reduction was observed in the subgroup of participants who had had a previous scan, but not in participants having their first scan[67].

## **DISCUSSION**

This is the first systematic scoping review aimed at quantifying the phenomenon of scanxiety in people having cancer-related scans. Scanxiety is a common and important clinical problem, as supported by the large number of studies identified by our search. There is a wide range of reported scanxiety prevalence (0 to 83%), and scanxiety is generally not severe. Severity of scanxiety may be lower after a scan and is higher in people who have a lower education, currently smoke, experience pain during a scan, have higher perceived risk of cancer, and who are having diagnostic (rather than screening) scans. Interventions are more likely to reduce scanxiety if they involve active participation (eg psychological and emotional support, meditation or a hand-held communication device) rather than passive participation (listening to music or education only).

Firm conclusions about prevalence and severity could not be drawn due to considerable methodological heterogeneity of the included studies, limiting the interpretation of results and comparisons between studies, and which highlights the need for a universally accepted measure to quantify scanxiety and

1  
2  
3 evaluate scanxiety interventions in the future. A recent literature review by Al-Dibouni[75] provided a  
4 narrative overview of scanxiety in studies involving people having scans for both cancer and non-cancer  
5 reasons. It also recognised the lack of a specific measurement tool for scanxiety and the variable  
6 scanxiety prevalence among studies[75].  
7

8  
9 Given the STAI and Likert scales were the most common tools used, we propose that future studies use  
10 the state anxiety subscale of the STAI, with a range of 20-80 and no specific anxiety threshold[72] (or  
11 variants, such as the STAI-6[76]), and/or the distress thermometer, with a range of 0-10 and a clinically  
12 significant threshold of  $\geq 4$ [77], to measure scanxiety. These tools can be combined with other validated  
13 anxiety measures, such as the HADS, to further refine the relationship between tools. Using existing  
14 measures rather than developing a scanxiety specific tool allows scanxiety assessment to occur  
15 immediately and broadly in clinical research.  
16

17  
18 Strengths of this scoping review include the rigorous methodology using a published framework[12, 13],  
19 two independent researchers for study selection and data extraction, and the implementation of a  
20 comprehensive search strategy and broad inclusion criteria to achieve an exhaustive review of the  
21 available literature. Limitations include a broad definition of scanxiety which resulted in heterogeneity in  
22 the type and timing of scanxiety measurement. This broad definition was necessary as there is no  
23 universal definition or specific measurement tool for scanxiety. Generalisability of the results are likely  
24 limited by heterogeneity in cancer type, reason for scan and imaging modality between the studies, and  
25 because the search strategy was restricted to English language databases. Finally, scanxiety in people  
26 who were recalled after an abnormal screening result or who had false-positive results were excluded  
27 from this review due to confounding and feasibility. These populations may be at higher risk of  
28 scanxiety, and further research may provide further insight about the scanxiety experience in this  
29 population.  
30  
31

32  
33 Additional research implications of our review include the need for research into high-risk populations  
34 for scanxiety, including people with advanced cancer. This population was included in only three studies  
35 [49, 55, 60]; however, people with cancer have higher rates of anxiety compared to the general  
36 population[78]. As they may be more likely to develop scanxiety, experience more severe scanxiety, or  
37 have higher post-scan scanxiety while waiting for scan results, longitudinal assessment of scanxiety is  
38 required. Further research into effective and feasible interventions is also required, though these will  
39 face implementation challenges due to variations in health systems and available resources.  
40  
41  
42  
43

## 44 **CONCLUSIONS**

45  
46 Prevalence and severity of scanxiety varied widely, although heterogeneity in scanxiety measurement  
47 limited comparisons between studies. A uniform approach to evaluating scanxiety will improve  
48 understanding of the phenomenon and help guide the development of interventions to high-risk  
49 populations.  
50  
51  
52  
53  
54  
55  
56  
57  
58

## FOOTNOTES

**Contributions:** KTB, PB, BK, HD and CB contributed to the concept and design of this review. KTB developed and implemented the search strategy. KTB and RL independently screened and reviewed titles, abstracts and full-text articles for inclusion. KTB and RL independently extracted data from the included studies. PB, BK and HD contributed content expertise to ensure clinically relevant interpretation of the data. KTB drafted the initial manuscript, and RL, PB, BK, HD and CB reviewed and approved the manuscript prior to submission.

**Competing interests:** None declared

**Funding:** This research received no specific grant from any funding agency in the public, commercial or not-for-profit sectors

## REFERENCES

1. Feiler B. Scanxiety. Fear of a postcancer ritual. *Time* 2011;177(24):56
2. Brandzel S, Erosenberg D, Johnson D, et al. Women's experiences and preferences regarding breast imaging after completing breast cancer treatment. *Patient Prefer Adherence* 2017;11:199-204.doi:10.2147/PPA.S122244
3. Evans R, Taylor S, Janes S, et al. Patient experience and perceived acceptability of whole-body magnetic resonance imaging for staging colorectal and lung cancer compared with current staging scans: a qualitative study. *BMJ Open* 2017;7(9):e016391.doi:10.1136/bmjopen-2017-016391
4. Mathers SA, McKenzie GA, Robertson EM. A necessary evil: The experiences of men with prostate cancer undergoing imaging procedures. *Radiography* 2011;17(4):284-91.doi:10.1016/j.radi.2011.06.005
5. Strand T, Tornqvist E, Rask M, et al. The experience of patients with neoplasm metastasis in the spine during a magnetic resonance imaging examination. *J Radiol Nurs* 2014;33(4):191-8.doi:10.1016/j.jradnu.2014.09.001
6. Truesdale-Kennedy M, Taggart L, McIlpatrick S. Breast cancer knowledge among women with intellectual disabilities and their experiences of receiving breast mammography. *J Adv Nurs* 2011;67(6):1294-304.doi:10.1111/j.1365-2648.2010.05595.x
7. Memorial Sloan Kettering. Coping with "Scanxiety" during and after Cancer Treatment 2013. <https://www.mskcc.org/blog/coping-scanxiety-during-and-after-treatment/> (accessed May 2020).
8. Dana-Farber Cancer Institute. Scan Anxiety (or 'Scanxiety'): 5 Approaches to Coping 2019. <https://blog.dana-farber.org/insight/2019/02/5-tips-for-reducing-scanxiety/> (accessed May 2020).
9. Barter K. Scans + Anxiety = Scanxiety 2019. <https://pinkhope.org.au/scans-anxiety-scanxiety/> (accessed May 2020).
10. brainstrust. Scanxiety. <https://brainstrust.org.uk/brain-tumour-support/quality-of-life/living-well-with-a-brain-tumour/scanxiety/> (accessed May 2020).
11. Fight Colorectal Cancer. Waiting for Test Results: 5 Tips to Minimize Scanxiety 2019. <https://fightcolorectalcancer.org/blog/scanxiety/> (accessed May 2020).
12. Arksey H, O'Malley L. Scoping studies: towards a methodological framework. *Int J Soc Res Methodol* 2005;8(1):19-32.doi:10.1080/1364557032000119616
13. Levac D, Colquhoun H, O'Brien KK. Scoping studies: advancing the methodology. *Implement Sci* 2010;5:69.doi:10.1186/1748-5908-5-69

14. Tricco AC, Lillie E, Zarin W, et al. PRISMA Extension for Scoping Reviews (PRISMA-ScR): Checklist and Explanation. *Ann Intern Med* 2018;169(7):467-73.doi:10.7326/M18-0850
15. Andolf E, Jorgensen C, Uddenberg N, et al. Psychological effects of ultrasound screening for ovarian carcinoma. *J Psychosom Obstet Gynaecol* 1990;11(2):155-62.doi:10.3109/01674829009084412
16. Bull AR, Campbell MJ. Assessment of the psychological impact of a breast screening programme. *Br J Radiol* 1991;64(762):510-5.doi:10.1259/0007-1285-64-762-510
17. Peteet JR, Stomper PC, Ross DM, et al. Emotional support for patients with cancer who are undergoing CT: semistructured interviews of patients at a cancer institute. *Radiology* 1992;182(1):99-102.doi:10.1148/radiology.182.1.1727318
18. Cockburn J, Staples M, Hurley SF, et al. Psychological consequences of screening mammography. *J Med Screen* 1994;1(1):7-12.doi:10.1177/096914139400100104
19. Ellman R, Thomas BA. Is psychological wellbeing impaired in long-term survivors of breast cancer? *J Med Screen* 1995;2(1):5-9.doi:10.1177/096914139500200103
20. Sutton S, Saidi G, Bickler G, et al. Does routine screening for breast cancer raise anxiety? Results from a three wave prospective study in England. *J Epidemiol Community Health* 1995;49(4):413-8.doi:10.1136/jech.49.4.413
21. Bakker DA, Lightfoot NE, Steggles S, et al. The experience and satisfaction of women attending breast cancer screening. *Oncol Nurs Forum* 1998;25(1):115-21
22. Gupta R, Nayak MB, Khoursheed M, et al. Emotional distress in women presenting for breast imaging. *Ann Saudi Med* 1999;19(6):511-4.doi:10.5144/0256-4947.1999.511
23. Hafslund B. Mammography and the experience of pain and anxiety. *Radiography* 2000;6(4):269-72.doi:10.1053/radi.2000.0281
24. Meystre-Agustoni G, Paccaud F, Jeannin A, et al. Anxiety in a cohort of Swiss women participating in a mammographic screening programme. *J Med Screen* 2001;8(4):213-9.doi:10.1136/jms.8.4.213
25. Drossaert CH, Boer H, Seydel ER. Monitoring women's experiences during three rounds of breast cancer screening: results from a longitudinal study. *J Med Screen* 2002;9(4):168-75.doi:10.1136/jms.9.4.168
26. Sandin B, Chorot P, Valiente RM, et al. Adverse psychological effects in women attending a second-stage breast cancer screening. *J Psychosom Res* 2002;52(5):303-9.doi:10.1016/s0022-3999(01)00227-6
27. Brunton M, Jordan C, Campbell I. Anxiety before, during, and after participation in a population-based screening mammography programme in Waikato Province, New Zealand. *N Z Med J* 2005;118(1209):U1299
28. Geurts TW, Ackerstaff AH, Van Zandwijk N, et al. The psychological impact of annual chest X-ray follow-up in head and neck cancer. *Acta Otolaryngol* 2006;126(12):1315-20.doi:10.1080/00016480600868414
29. Tyndel S, Austoker J, Henderson BJ, et al. What is the psychological impact of mammographic screening on younger women with a family history of breast cancer? Findings from a prospective cohort study by the PIMMS Management Group. *J Clin Oncol* 2007;25(25):3823-30.doi:10.1200/JCO.2007.11.0437
30. Bunge EM, van den Bergh KA, Essink-Bot ML, et al. High affective risk perception is associated with more lung cancer-specific distress in CT screening for lung cancer. *Lung Cancer* 2008;62(3):385-90.doi:10.1016/j.lungcan.2008.03.029
31. Brown Sofair J, Lehlbach M. The role of anxiety in a mammography screening program. *Psychosomatics* 2008;49(1):49-55.doi:10.1176/appi.psy.49.1.49

- 1  
2  
3 32. van den Bergh KA, Essink-Bot ML, Bunge EM, et al. Impact of computed tomography screening  
4 for lung cancer on participants in a randomized controlled trial (NELSON trial). *Cancer* 2008;113(2):396-  
5 404.doi:dx.doi.org/10.1002/cncr.23590
- 6 33. Westerterp M, van Westreenen HL, Deutekom M, et al. Patients' perception of diagnostic tests  
7 in the preoperative assessment of esophageal cancer. *Patient Prefer Adherence* 2008;2:157-62
- 8 34. Bastiaannet E, Hoekstra-Weebers JE, Francken AB, et al. Perception of burden experienced  
9 during diagnostic tests by melanoma patients with lymph node metastases. *Melanoma Res*  
10 2009;19(1):36-41.doi:10.1097/CMR.0b013e32831993b7
- 11 35. Vierikko T, Kivisto S, Jarvenpaa R, et al. Psychological impact of computed tomography screening  
12 for lung cancer and occupational pulmonary disease among asbestos-exposed workers. *Eur J Cancer*  
13 *Prev* 2009;18(3):203-6.doi:10.1097/cej.0b013e328329d800
- 14 36. Bolukbas N, Erbil N, Kahraman AN. Determination of the anxiety level of women who present for  
15 mammography. *Asian Pac J Cancer Prev* 2010;11(2):495-8
- 16 37. Thompson CA, Charlson ME, Schenkein E, et al. Surveillance CT scans are a source of anxiety and  
17 fear of recurrence in long-term lymphoma survivors. *Ann Oncol* 2010;21(11):2262-  
18 6.doi:10.1093/annonc/mdq215
- 19 38. Hutton J, Walker LG, Gilbert FJ, et al. Psychological impact and acceptability of magnetic  
20 resonance imaging and X-ray mammography: the MARIBS Study. *Br J Cancer* 2011;104(4):578-  
21 86.doi:10.1038/bjc.2011.1
- 22 39. Pifarre P, Simo M, Gispert JD, et al. [Diagnostic imaging studies: do they create anxiety?]. *Rev*  
23 *Esp Med Nucl* 2011;30(6):346-50.doi:dx.doi.org/10.1016/j.remnu.2011.03.003
- 24 40. Steinemann SK, Chun MB, Huynh DH, et al. Breast cancer worry among women awaiting  
25 mammography: is it unfounded? Does prior counseling help? *Hawaii Med J* 2011;70(7):149-50
- 26 41. Yu LS, Chojniak R, Borba MA, et al. Prevalence of anxiety in patients awaiting diagnostic  
27 procedures in an oncology center in Brazil. *Psychooncology* 2011;20(11):1242-5.doi:10.1002/pon.1842
- 28 42. Bredart A, Kop JL, Fall M, et al. Anxiety and specific distress in women at intermediate and high  
29 risk of breast cancer before and after surveillance by magnetic resonance imaging and mammography  
30 versus standard mammography. *Psychooncology* 2012;21(11):1185-94.doi:10.1002/pon.2025
- 31 43. Hafslund B, Espehaug B, Nortvedt MW. Health-related quality of life, anxiety and depression  
32 related to mammography screening in Norway. *J Clin Nurs* 2012;21(21-22):3223-34.doi:10.1111/j.1365-  
33 2702.2012.04244.x
- 34 44. Adams HJ, Kwee TC, Vermoolen MA, et al. Whole-body MRI vs. CT for staging lymphoma: patient  
35 experience. *Eur J Radiol* 2014;83(1):163-6.doi:10.1016/j.ejrad.2013.10.008
- 36 45. Baena-Canada JM, Rosado-Varela P, Exposito-Alvarez I, et al. Women's perceptions of breast  
37 cancer screening. Spanish screening programme survey. *Breast* 2014;23(6):883-  
38 8.doi:10.1016/j.breast.2014.09.010
- 39 46. Andersson C, Johansson B, Wassberg C, et al. Patient experience of an 18F-FDG-PET/CT  
40 examination: Need for improvements in patient care. *J Radiol Nurs* 2015;34(2):100-  
41 8.doi:10.1016/j.jradnu.2014.11.008
- 42 47. Elboga U, Elboga G, Can C, et al. Assessment of procedure related anxiety and depression in  
43 oncologic patients before F-18 FDG PET-CT imaging. *J Psychiatry* 2015;18 (1) (no  
44 pagination)(215).doi:10.4172/Psychiatry.1000215
- 45 48. Hobbs MM, Taylor DB, Buzynski S, et al. Contrast-enhanced spectral mammography (CESM) and  
46 contrast enhanced MRI (CEMRI): Patient preferences and tolerance. *J Med Imaging Radiat Oncol*  
47 2015;59(3):300-5.doi:10.1111/1754-9485.12296
- 48 49. Bauml JM, Troxel A, Epperson CN, et al. Scan-associated distress in lung cancer: Quantifying the  
49 impact of "scanxiety". *Lung Cancer* 2016;100:110-3.doi:10.1016/j.lungcan.2016.08.002
- 50  
51  
52  
53  
54  
55  
56  
57  
58

- 1  
2  
3 50. Abreu C, Grilo A, Lucena F, et al. Oncological Patient Anxiety in Imaging Studies: the PET/CT  
4 Example. *J Cancer Educ* 2017;32(4):820-6.doi:10.1007/s13187-016-1069-3
- 5 51. Grilo A, Vieira L, Carolino E, et al. Anxiety in Cancer Patients during (18)F-FDG PET/CT Low Dose:  
6 A Comparison of Anxiety Levels before and after Imaging Studies. *Nurs Res Pract*  
7 2017;2017:3057495.doi:10.1155/2017/3057495
- 8 52. Evans RE, Taylor SA, Beare S, et al. Perceived patient burden and acceptability of whole body  
9 MRI for staging lung and colorectal cancer; comparison with standard staging investigations. *Br J Radiol*  
10 2018;91(1086):20170731.doi:10.1259/bjr.20170731
- 11 53. Goense L, Borggreve AS, Heethuis SE, et al. Patient perspectives on repeated MRI and PET/CT  
12 examinations during neoadjuvant treatment of esophageal cancer. *Br J Radiol*  
13 2018;91(1086):20170710.doi:10.1259/bjr.20170710
- 14 54. Hall DL, Lennes IT, Carr A, et al. Lung Cancer Screening Uncertainty among Patients Undergoing  
15 LDCT. *Am J Health Behav* 2018;42(1):69-76.doi:10.5993/AJHB.42.1.7
- 16 55. Derry HM, Maciejewski PK, Epstein AS, et al. Associations between Anxiety, Poor Prognosis, and  
17 Accurate Understanding of Scan Results among Advanced Cancer Patients. *J Palliat Med* 2019;22(8):961-  
18 5.doi:10.1089/jpm.2018.0624
- 19 56. Soriano EC, Perndorfer C, Siegel SD, et al. Threat sensitivity and fear of cancer recurrence: a daily  
20 diary study of reactivity and recovery as patients and spouses face the first mammogram post-diagnosis.  
21 *J Psychosoc Oncol* 2019;37(2):131-44.doi:10.1080/07347332.2018.1535532
- 22 57. Taghizadeh N, Tremblay A, Cressman S, et al. Health-related quality of life and anxiety in the  
23 PAN-CAN lung cancer screening cohort. *BMJ Open* 2019;9(1):e024719.doi:10.1136/bmjopen-2018-  
24 024719
- 25 58. Bancroft EK, Saya S, Brown E, et al. Psychosocial effects of whole-body MRI screening in adult  
26 high-risk pathogenic TP53 mutation carriers: a case-controlled study (SIGNIFY). *J Med Genet*  
27 2020;57(4):226-36.doi:10.1136/jmedgenet-2019-106407
- 28 59. Grilo AM, Vieira L, Carolino E, et al. Cancer Patient Experience in a Nuclear Medicine  
29 Department: Comparison between Bone Scintigraphy and (18)F-FDG PET/CT. *J Nucl Med Technol*  
30 2020.doi:10.2967/jnmt.119.239285
- 31 60. Morreale MK, Moore TF, Kim S, et al. Preferences for notification of imaging results in patients  
32 with metastatic cancer. *Patient Educ Couns* 2020;103(2):392-7.doi:10.1016/j.pec.2019.08.032
- 33 61. Paiella S, Marinelli V, Secchettin E, et al. The emotional impact of surveillance programs for  
34 pancreatic cancer on high-risk individuals: A prospective analysis. *Psychooncology* 2020;29(6):1004-  
35 11.doi:10.1002/pon.5370
- 36 62. Mainiero MB, Schepps B, Clements NC, et al. Mammography-related anxiety: effect of  
37 preprocedural patient education. *Womens Health Issues* 2001;11(2):110-5.doi:10.1016/s1049-  
38 3867(00)00071-2
- 39 63. Domar AD, Eyvazzadeh A, Allen S, et al. Relaxation techniques for reducing pain and anxiety  
40 during screening mammography. *AJR Am J Roentgenol* 2005;184(2):445-  
41 7.doi:10.2214/ajr.184.2.01840445
- 42 64. Fernandez-Feito A, Lana A, Baldonado-Cernuda R, et al. A brief nursing intervention reduces  
43 anxiety before breast cancer screening mammography. *Psicothema* 2015;27(2):128-  
44 33.doi:10.7334/psicothema2014.203
- 45 65. Caruso A, Bongiorno L, Vallini L, et al. Breast cancer and distress resulting from Magnetic  
46 Resonance Imaging (MRI): the impact of a psychological intervention of emotional and informative  
47 support. *J Exp Clin Cancer Res* 2006;25(4):499-505
- 48 66. Vogel WV, Valdes Olmos RA, Tijs TJ, et al. Intervention to lower anxiety of 18F-FDG PET/CT  
49 patients by use of audiovisual imagery during the uptake phase before imaging. *J Nucl Med Technol*  
50 2012;40(2):92-8.doi:10.2967/jnmt.111.097964

- 1  
2  
3 67. Acuff SN, Bradley YC, Barlow P, et al. Reduction of patient anxiety in PET/CT imaging by  
4 improving communication between patient and technologist. *J Nucl Med Technol* 2014;42(3):211-  
5 7.doi:10.2967/jnmt.114.139915  
6  
7 68. Raz DJ, Nelson RA, Kim JY, et al. Pilot study of a video intervention to reduce anxiety and  
8 promote preparedness for lung cancer screening. *Cancer Treat Res Commun* 2018;16:1-  
9 8.doi:10.1016/j.ctarc.2018.04.004  
10  
11 69. Zavotsky KE, Banavage A, James P, et al. The effects of music on pain and anxiety during  
12 screening mammography. *Clin J Oncol Nurs* 2014;18(3):E45-9.doi:10.1188/14.CJON.E45-E49  
13  
14 70. Ashton JC, Bousquet D, Fevrier E, et al. Massage therapy in the breast imaging department:  
15 repurposing an ancient anxiety reducing method. *Clin Imaging* 2020;67:49-  
16 54.doi:10.1016/j.clinimag.2020.05.029  
17  
18 71. Lorca AM, Lorca MM, Criado JJ, et al. Using mindfulness to reduce anxiety during pet/ct studies.  
19 *Mindfulness* 2019;10:1163-8.doi:10.1007/s12671-018-1065-2  
20  
21 72. Spielberger CD, Gorsuch RL, Lushene R, et al. Manual for the State-Trait Anxiety Inventory. Palo  
22 Alto, CA: Consulting Psychologists Press 1983.  
23  
24 73. Zigmond AS, Snaith RP. The Hospital Anxiety and Depression Scale. *Acta Psychiatr Scand*  
25 1983;67(6):361-70.doi:10.1111/j.1600-0447.1983.tb09716.x  
26  
27 74. Rush Jr AJ, First MB, Blacker D. Handbook of Psychiatric Measures: Symptom Checklist-90-  
28 Revised (SCL-90-R); Brief Symptom Inventory (BSI). 2nd ed. Arlington, VA: American Psychiatric  
29 Publishing, Inc. 2008.  
30  
31 75. Al-Dibouni Z. Scanxiety. Improving the patient's experience. Part 1. *Imaging & Therapy Practice*  
32 2019;21-5  
33  
34 76. Marteau T, Bekker H. The development of a six-item short-form of the state scale of the  
35 Spielberger State-Trait Anxiety Inventory (STAI). *Br J Clin Psychol* 1992;31(3):301-6.doi:10.1111/j.2044-  
36 8260.1992.tb00997.x  
37  
38 77. Ownby K. Use of the Distress Thermometer in Clinical Practice. *J Adv Pract Oncol*  
39 2019;10(2).doi:10.6004/jadpro.2019.10.2.7  
40  
41 78. Pitman A, Suleman S, Hyde N, et al. Depression and anxiety in patients with cancer. *BMJ*  
42 2018;361:k1415.doi:10.1136/bmj.k1415  
43  
44  
45  
46  
47  
48  
49  
50  
51  
52  
53  
54  
55  
56  
57  
58

## FIGURE CAPTIONS

40 **Figure 1.** Search strategy used for Ovid MEDLINE (1946 onwards)

42 **Figure 2.** Study search and selection flow diagram



**Figure 1.** Search strategy used for Ovid MEDLINE (1946 onwards)

| # | Search                | #  | Search                  | #  | Search                 | #  | Search           |
|---|-----------------------|----|-------------------------|----|------------------------|----|------------------|
| 1 | Exp Neoplasms/        | 9  | carcinoma*.ti,ab        | 15 | exp Anxiety/           | 22 | or/1-8           |
| 2 | Exp Medical oncology/ | 10 | Exp Diagnostic Imaging/ | 16 | exp Anxiety Disorders/ | 23 | or/9-14          |
| 3 | neoplasm*.ti,ab       | 11 | imaging.ti,ab           | 17 | exp Fear/              | 24 | or/15-21         |
| 4 | cancer*.ti,ab         | 12 | scan.ti,ab              | 18 | anxi*.ti,ab            | 25 | 22 and 23 and 24 |
| 5 | neoplasm*.ti,ab       | 13 | tomography.ti,ab        | 19 | fear.ti,ab             |    |                  |
| 6 | malignan*.ti,ab       | 14 | ultraso*.ti,ab          | 20 | worr*.ti,ab            |    |                  |
| 7 | tum??r*.ti,ab         |    |                         | 21 | distress*.ti,ab        |    |                  |
| 8 | oncolog*.ti,ab        |    |                         |    |                        |    |                  |

For peer review only

**Figure 2.** Study search and selection flow diagram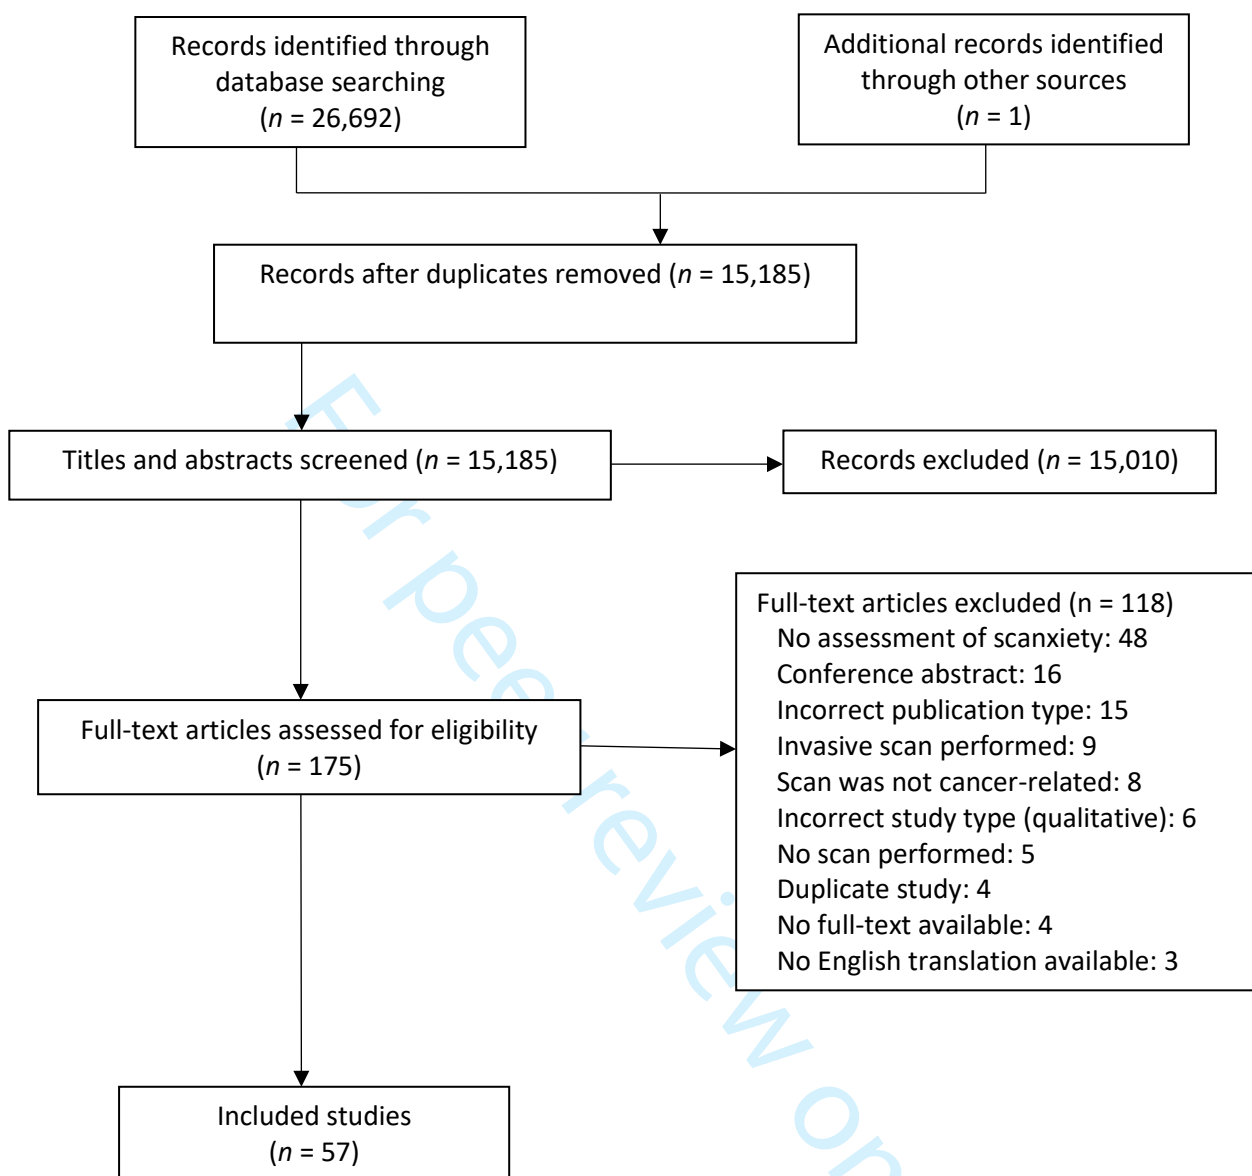

1  
2  
3 **Supplementary File 1. Protocol**

4 **Scanxiety for cancer-related scans: A systematic scoping review**

5  
6 Protocol

7  
8 Version 1.0, 10/04/2019  
9

10  
11 **Authors**

12  
13 Dr Kim Tam Bui

14  
15 Dr Roger Liang

16  
17 Dr Haryana Dhillon

18  
19 Dr Belinda Kiely

20  
21 Dr Prunella Blinman  
22

23 **Correspondence**

24  
25 Dr Kim Tam Bui

26  
27 Email: [tam.bui@health.nsw.gov.au](mailto:tam.bui@health.nsw.gov.au)

28  
29 Concord Cancer Centre

30  
31 Concord Repatriation General Hospital

32  
33 1A Hospital Road

34  
35 Concord NSW 2137  
36  
37  
38  
39  
40  
41  
42  
43  
44  
45  
46  
47  
48  
49  
50  
51  
52  
53  
54  
55  
56  
57  
58  
59  
60

## Introduction

Radiological scans are necessary to diagnose and stage cancers, to monitor for cancer recurrence or progression or to investigate new cancer- or treatment-related problems. Imaging modalities include plain X-rays, computed tomography (CT) scans, positron-emission tomography (PET) scans, magnetic resonance imaging (MRI), ultrasound and nuclear medicine bone scans.

Distress before, during or after a scan has been dubbed “scanxiety” by a patient writing for the Time Magazine in 2011[1]. This is a common clinical problem that is widely discussed on social media and patient forms, but there is a paucity in the literature about this topic. This systematic scoping study aims to increase the understanding about scanxiety.

## Objectives

The objectives of this study are to:

- determine the incidence and severity of scanxiety in adults who have scans for cancer-related reasons;
- compare tools that measure scanxiety;
- identify contributing and exacerbating determinants of scanxiety;
- identify strategies or interventions that reduce scanxiety; and,
- explore the experiences of scanxiety for patients and other stakeholders

## Methods

This protocol is based on the six-step methodological framework developed by Arskey & O’Malley[2] and modified by Levac *et al.*[3], and guided by the Preferred Reporting Items for Systematic review and Meta-Analysis Protocols extension for Scoping Reviews (PRISMA-ScR) checklist[4].

## ***Inclusion and exclusion criteria***

Publications will be included if they were original full-text research articles that addressed scanxiety in adults over 18 years of age who had a scan for a cancer-related reason. Outcome measures have to include at least one of the following: the incidence of scanxiety; severity of scanxiety; contributing or exacerbating factors of scanxiety; intervention to improve scanxiety, or; experiences of patients with scanxiety. All types of non-interventional imaging modalities are acceptable. Any type or stage of cancer is acceptable, including populations undergoing cancer screening. No date or language restriction will be applied to electronic database searching.

Interventional imaging will be excluded. Review articles, editorials, letters and protocols will be excluded.

### **Search protocol**

A systematic review of the following electronic databases will be conducted by one author (KTB): Ovid MEDLINE, Ovid EMBASE, Ovid PsycINFO, Ovid Cochrane, Scopus, ESCBO CINAHL and PubMed. The search strategy will combine the subject headings and keywords of cancer (neoplasm\* or cancer\* or malignan\* or tum??r\* or oncolog\* or carcinoma\*), imaging (diagnostic imaging or imaging or scan\* or tomography or ultraso\* or radionucl\*) and anxiety (anxi\* or fear\* or worr\* or distress\*). Hand searching of reference lists of included articles will be undertaken.

All references will be imported into Endnote V9. After removal of duplicates, two authors (KTB and RL) will independently review and screen publication titles and abstracts for eligibility. Of the articles deemed potentially eligible, the full text of the article will be evaluated for final inclusion. Discrepancies will be decided by discussion between the two authors (KTB and RL), and will be escalated to all authors if a consensus cannot be reached.

### **Data extraction and analysis**

Standardised data collection forms will be developed. Relevant data will be independently extracted from by two authors (KTB and RL) into an electronic data extraction form (Table 1).

Table 1. Included data items on the electronic data extraction form

|                     |                                                                                                                       |
|---------------------|-----------------------------------------------------------------------------------------------------------------------|
| Publication details | Study name/Title of article<br>Study authors<br>Date of publication (year)<br>Country the study was held              |
| Study details       | Study aims<br>Population including age, gender, type of cancer<br>Study design<br>Measurement tool used for scanxiety |
| Results/outcomes    | Sample size<br>Demographics – gender, age<br>Cancer factors – type of cancers included<br>Incidence of scanxiety      |

|  |                                                              |
|--|--------------------------------------------------------------|
|  | Severity of scanxiety                                        |
|  | Contributing and exacerbating determinants of scanxiety      |
|  | Experiences of scanxiety for patients and other stakeholders |
|  | If intervention: efficacy                                    |

Data will be analysed depending on the population who underwent imaging (eg for screening, for early cancer or for advanced cancer) and the type of study (eg observational or intervention). Quantitative findings will be synthesised using summary statistics including the mean and range.

### **Consultation**

Health care professionals with clinical experience in oncology and psychology will be consulted for content expertise and to discuss preliminary findings.

### **References**

1. Feiler B. Scanxiety. Fear of a postcancer ritual. *Time*. 2011;177(24):56.
2. Arksey H, O'Malley L. Scoping studies: towards a methodological framework. *International Journal of Social Research Methodology*. 2005;8(1):19-32.
3. Levac D, Colquhoun H, O'Brien KK. Scoping studies: advancing the methodology. *Implement Sci*. 2010;5:69.
4. Tricco AC, Lillie E, Zarin W, O'Brien KK, Colquhoun H, Levac D, et al. PRISMA Extension for Scoping Reviews (PRISMA-ScR): Checklist and Explanation. *Ann Intern Med*. 2018;169(7):467-73.

**Research checklist.** Preferred Reporting Items for Systematic reviews and Meta-Analyses extension for Scoping Reviews (PRISMA-ScR) Checklist

| SECTION                                              | ITEM | PRISMA-ScR CHECKLIST ITEM                                                                                                                                                                                                                                                                                  | REPORTED ON PAGE # |
|------------------------------------------------------|------|------------------------------------------------------------------------------------------------------------------------------------------------------------------------------------------------------------------------------------------------------------------------------------------------------------|--------------------|
| <b>TITLE</b>                                         |      |                                                                                                                                                                                                                                                                                                            |                    |
| Title                                                | 1    | Identify the report as a scoping review.                                                                                                                                                                                                                                                                   | 1                  |
| <b>ABSTRACT</b>                                      |      |                                                                                                                                                                                                                                                                                                            |                    |
| Structured summary                                   | 2    | Provide a structured summary that includes (as applicable): background, objectives, eligibility criteria, sources of evidence, charting methods, results, and conclusions that relate to the review questions and objectives.                                                                              | 2                  |
| <b>INTRODUCTION</b>                                  |      |                                                                                                                                                                                                                                                                                                            |                    |
| Rationale                                            | 3    | Describe the rationale for the review in the context of what is already known. Explain why the review questions/objectives lend themselves to a scoping review approach.                                                                                                                                   | 3                  |
| Objectives                                           | 4    | Provide an explicit statement of the questions and objectives being addressed with reference to their key elements (e.g., population or participants, concepts, and context) or other relevant key elements used to conceptualize the review questions and/or objectives.                                  | 3                  |
| <b>METHODS</b>                                       |      |                                                                                                                                                                                                                                                                                                            |                    |
| Protocol and registration                            | 5    | Indicate whether a review protocol exists; state if and where it can be accessed (e.g., a Web address); and if available, provide registration information, including the registration number.                                                                                                             | 3                  |
| Eligibility criteria                                 | 6    | Specify characteristics of the sources of evidence used as eligibility criteria (e.g., years considered, language, and publication status), and provide a rationale.                                                                                                                                       | 3-4                |
| Information sources                                  | 7    | Describe all information sources in the search (e.g., databases with dates of coverage and contact with authors to identify additional sources), as well as the date the most recent search was executed.                                                                                                  | 3                  |
| Search                                               | 8    | Present the full electronic search strategy for at least 1 database, including any limits used, such that it could be repeated.                                                                                                                                                                            | Figure 1           |
| Selection of sources of evidence                     | 9    | State the process for selecting sources of evidence (i.e., screening and eligibility) included in the scoping review.                                                                                                                                                                                      | 4                  |
| Data charting process                                | 10   | Describe the methods of charting data from the included sources of evidence (e.g., calibrated forms or forms that have been tested by the team before their use, and whether data charting was done independently or in duplicate) and any processes for obtaining and confirming data from investigators. | 4                  |
| Data items                                           | 11   | List and define all variables for which data were sought and any assumptions and simplifications made.                                                                                                                                                                                                     | 4                  |
| Critical appraisal of individual sources of evidence | 12   | If done, provide a rationale for conducting a critical appraisal of included sources of evidence; describe the methods used and how this information was used in any data synthesis (if appropriate).                                                                                                      | N/A                |
| Synthesis of results                                 | 13   | Describe the methods of handling and summarizing the data that were charted.                                                                                                                                                                                                                               | 4                  |

| SECTION                                       | ITEM | PRISMA-ScR CHECKLIST ITEM                                                                                                                                                                       | REPORTED ON PAGE #                   |
|-----------------------------------------------|------|-------------------------------------------------------------------------------------------------------------------------------------------------------------------------------------------------|--------------------------------------|
| <b>RESULTS</b>                                |      |                                                                                                                                                                                                 |                                      |
| Selection of sources of evidence              | 14   | Give numbers of sources of evidence screened, assessed for eligibility, and included in the review, with reasons for exclusions at each stage, ideally using a flow diagram.                    | Figure 2                             |
| Characteristics of sources of evidence        | 15   | For each source of evidence, present characteristics for which data were charted and provide the citations.                                                                                     | 5-10, including Tables 1 and 2       |
| Critical appraisal within sources of evidence | 16   | If done, present data on critical appraisal of included sources of evidence (see item 12).                                                                                                      | N/A                                  |
| Results of individual sources of evidence     | 17   | For each included source of evidence, present the relevant data that were charted that relate to the review questions and objectives.                                                           | 11-18, including Tables 3,4, 5 and 6 |
| Synthesis of results                          | 18   | Summarize and/or present the charting results as they relate to the review questions and objectives.                                                                                            | 11-18                                |
| <b>DISCUSSION</b>                             |      |                                                                                                                                                                                                 |                                      |
| Summary of evidence                           | 19   | Summarize the main results (including an overview of concepts, themes, and types of evidence available), link to the review questions and objectives, and consider the relevance to key groups. | 18-19                                |
| Limitations                                   | 20   | Discuss the limitations of the scoping review process.                                                                                                                                          | 19                                   |
| Conclusions                                   | 21   | Provide a general interpretation of the results with respect to the review questions and objectives, as well as potential implications and/or next steps.                                       | 19                                   |
| <b>FUNDING</b>                                |      |                                                                                                                                                                                                 |                                      |
| Funding                                       | 22   | Describe sources of funding for the included sources of evidence, as well as sources of funding for the scoping review. Describe the role of the funders of the scoping review.                 | 20                                   |



# BMJ Open

## Scanxiety: A scoping review about scan-associated anxiety

|                                 |                                                                                                                                                                                                                                                                                                                                                                                                                                                                                                                                                         |
|---------------------------------|---------------------------------------------------------------------------------------------------------------------------------------------------------------------------------------------------------------------------------------------------------------------------------------------------------------------------------------------------------------------------------------------------------------------------------------------------------------------------------------------------------------------------------------------------------|
| Journal:                        | <i>BMJ Open</i>                                                                                                                                                                                                                                                                                                                                                                                                                                                                                                                                         |
| Manuscript ID                   | bmjopen-2020-043215.R1                                                                                                                                                                                                                                                                                                                                                                                                                                                                                                                                  |
| Article Type:                   | Original research                                                                                                                                                                                                                                                                                                                                                                                                                                                                                                                                       |
| Date Submitted by the Author:   | 03-Feb-2021                                                                                                                                                                                                                                                                                                                                                                                                                                                                                                                                             |
| Complete List of Authors:       | Bui, Kim Tam; Concord Repatriation General Hospital, Medical Oncology; The University of Sydney Sydney Medical School<br>Liang, Roger; Concord Repatriation General Hospital, Medical Oncology<br>Kiely, Belinda; Concord Repatriation General Hospital, Medical Oncology; The University of Sydney Sydney Medical School<br>Brown, Chris; NHMRC Clinical Trials Centre<br>Dhillon, Haryana; The University of Sydney, Psycho-Oncology Cooperative Research Group; CEMPED<br>Blinman, Prunella; Concord Repatriation General Hospital, Medical Oncology |
| <b>Primary Subject Heading</b>: | Oncology                                                                                                                                                                                                                                                                                                                                                                                                                                                                                                                                                |
| Secondary Subject Heading:      | Radiology and imaging                                                                                                                                                                                                                                                                                                                                                                                                                                                                                                                                   |
| Keywords:                       | Adult oncology < ONCOLOGY, Diagnostic radiology < RADIOLOGY & IMAGING, Anxiety disorders < PSYCHIATRY                                                                                                                                                                                                                                                                                                                                                                                                                                                   |
|                                 |                                                                                                                                                                                                                                                                                                                                                                                                                                                                                                                                                         |

SCHOLARONE™  
Manuscripts



I, the Submitting Author has the right to grant and does grant on behalf of all authors of the Work (as defined in the below author licence), an exclusive licence and/or a non-exclusive licence for contributions from authors who are: i) UK Crown employees; ii) where BMJ has agreed a CC-BY licence shall apply, and/or iii) in accordance with the terms applicable for US Federal Government officers or employees acting as part of their official duties; on a worldwide, perpetual, irrevocable, royalty-free basis to BMJ Publishing Group Ltd ("BMJ") its licensees and where the relevant Journal is co-owned by BMJ to the co-owners of the Journal, to publish the Work in this journal and any other BMJ products and to exploit all rights, as set out in our [licence](#).

The Submitting Author accepts and understands that any supply made under these terms is made by BMJ to the Submitting Author unless you are acting as an employee on behalf of your employer or a postgraduate student of an affiliated institution which is paying any applicable article publishing charge ("APC") for Open Access articles. Where the Submitting Author wishes to make the Work available on an Open Access basis (and intends to pay the relevant APC), the terms of reuse of such Open Access shall be governed by a Creative Commons licence – details of these licences and which [Creative Commons](#) licence will apply to this Work are set out in our licence referred to above.

Other than as permitted in any relevant BMJ Author's Self Archiving Policies, I confirm this Work has not been accepted for publication elsewhere, is not being considered for publication elsewhere and does not duplicate material already published. I confirm all authors consent to publication of this Work and authorise the granting of this licence.

**Title**

Scanxiety: A scoping review about scan-associated anxiety

**Authors:**

Kim Tam Bui<sup>1,2</sup>, Roger Liang<sup>1</sup>, Belinda E Kiely<sup>1,2,3</sup>, Chris Brown<sup>3</sup>, Haryana M Dhillon<sup>4,5</sup> & Prunella Blinman<sup>1,2</sup>

**Affiliations:**

<sup>1</sup>Medical Oncology, Concord Cancer Centre, Concord, NSW, Australia

<sup>2</sup>Sydney Medical School, University of Sydney, Camperdown, NSW, Australia

<sup>3</sup>NHMRC Clinical Trials Centre, University of Sydney, Camperdown, NSW, Australia

<sup>4</sup>Psycho-Oncology Cooperative Research Group, School of Psychology, University of Sydney, Camperdown, NSW, Australia

<sup>5</sup>Centre for Medical Psychology & Evidence-based Decision-making, University of Sydney, Camperdown NSW, Australia

**Corresponding author:**

Prunella Blinman

Postal address: Medical Oncology

Concord Cancer Centre

1A Hospital Road

Concord NSW 2137

Email: prunella.blinman@health.nsw.gov.au

ORCID ID: 0000-0002-0712-372X

**Word count: 4037**

Keywords: scanxiety, imaging, scans, cancer, anxiety

**Presentations**

Bui, K.T., Liang, R., Kiely, B.E., Brown, C., Dhillon, H.M. & Blinman, P. What is scanxiety? A systematic scoping review [Poster]. Proceedings of the 2020 MOGA Abstract and Poster Program for Medical Oncology Advanced Trainees and Young Oncologists, 2020 August 14-21; Asia Pac J Clin Oncol, 16(2), 30-31.

## Abstract

**Objectives:** To identify the available literature on the prevalence, severity and contributing factors of scan-associated anxiety ('scanxiety'), and interventions to reduce it.

**Design:** Systematic scoping review.

**Data sources:** Ovid MEDLINE, Ovid EMBASE, Ovid PsycINFO, Ovid Cochrane Central Register of Controlled Trials, Scopus, EBSCO CINAHL and PubMed up to July 2020.

**Study selection:** Eligible studies recruited people having a cancer-related non-invasive scan (including screening) and contained a quantitative assessment of scanxiety.

**Data extraction:** Demographics and scanxiety outcomes were recorded for each study and the data summarised by descriptive statistics.

**Results:** Of 26,693 citations, 57 studies were eligible for inclusion across a range of scan types (mammogram 26/57, 46%; positron-emission tomography 14/57, 25%; computed tomography 14/57, 25%) and designs (observation 47/57, 82%; intervention 10/57, 18%). Eighty-one measurement tools were used to quantify the prevalence and/or severity of scanxiety, including purpose-designed Likert scales (17/81, 21%); the State Trait Anxiety Inventory (14/81, 17%) and the Hospital Anxiety and Depression Scale (9/81, 11%). Scanxiety prevalence ranged from 0% to 83%. Mean severity scores appeared low in almost all measures which quantitatively measured scanxiety (54/62, 87%). Moderate to severe scanxiety occurred in 4% to 28% of people in studies using descriptive measures. Nine of 20 studies assessing scanxiety pre- and post-scan reported a significant post-scan reduction in scanxiety. Lower education, smoking, higher levels of pain, higher perceived risk of cancer and diagnostic scans (v screening scans) consistently correlated with higher scanxiety severity, but not age, gender, ethnicity or marital status. Interventions included relaxation, distraction, education and psychological support. Six of the 10 interventions showed a reduction in scanxiety.

**Conclusions:** Prevalence and severity of scanxiety varied widely likely due to heterogeneous methods of measurement. A uniform approach to evaluating scanxiety will improve understanding of the phenomenon and help guide interventions.

## Strengths and limitations of this study

- This is the first scoping review on scanxiety
- A comprehensive search strategy and broad inclusion criteria have resulted in an extensive summary of all available literature
- Summary statistics for prevalence and severity of scanxiety were not possible due to heterogeneity in the type and timing of measurement tools between the studies.

## INTRODUCTION

Anxiety may increase when people have scans to screen for, diagnose, or stage cancer, or to monitor cancer for recurrence or progression. Scan-associated anxiety, or the distress before, during or after a scan, was first dubbed 'scanxiety' by a patient writing for the Time Magazine in 2011[1].

Qualitative research on the experience of having a scan has shown some people experience dread in the weeks before a scan[2], perceive scans as dehumanising, unpleasant or causing claustrophobia[2-5], and find scans trigger fear of the unknown and fear of cancer recurrence[2, 3, 6]. Scanxiety is recognised as a common clinical concern on social media and public forums, and is acknowledged by international cancer institutions[7, 8] and cancer-specific support networks[9-11]. Despite this, scanxiety is not uniformly recognised or measured in published studies. We conducted a systematic scoping review to identify the available literature on scanxiety in people having cancer-related scans.

## METHODS

We conducted a systematic scoping review based on the six-step methodological framework developed by Arskey & O'Malley[12] and modified by Levac *et al.*[13], and guided by the Preferred Reporting Items for Systematic review and Meta-Analysis protocols extension for Scoping Reviews (PRISMA-ScR) checklist[14]. The study protocol and amendments are available (**Supplementary File 1 & 2**).

### Step 1: Research question

Our aim was to increase the understanding of scanxiety by: determining the prevalence and severity of scanxiety; identifying contributing factors to scanxiety; identifying interventions to reduce scanxiety in people having cancer-related scans; and, exploring patient experiences with scanxiety.

### Step 2: Search strategy

Published studies were identified from seven electronic databases: Ovid MEDLINE (1946 onwards), Ovid EMBASE (1947 onwards), Ovid PsycINFO (1806 onwards), Ovid Cochrane Central Register of Controlled Trials (1991 onwards), Scopus (any year), EBSCO CINAHL (any year) and PubMed (any year). The search strategy combined the subject headings and keywords of cancer, imaging and anxiety. An example is provided in **Figure 1**. Reference lists of included articles were hand-searched for additional studies. All references were imported into Endnote V9.

The initial search was conducted on April 11, 2019, and updated on July 3, 2020.

### Step 3: Study selection

Inclusion criteria were full-text original research studies that recruited adults ( $\geq 18$  years old) who had a non-invasive scan for a cancer-related reason, and which quantitatively assessed the prevalence or severity of scanxiety, reported a statistical comparison between pre- and post-scan scanxiety, reported a

1  
2  
3 statistical comparison between scanxiety and possible contributing factors, or evaluated the impact of  
4 an intervention on scanxiety.  
5

6 Cancer-related reasons included screening (detection of cancer in asymptomatic person), diagnosis  
7 (detection of cancer in symptomatic person), staging (determining extent of cancer in person with  
8 confirmed or suspected cancer), surveillance (detection of recurrence in person with cancer treated with  
9 curative intent) or monitoring (detection of progression in person with cancer treated with non-curative  
10 intent).  
11

12  
13 The measurement of scanxiety was defined as any measure of anxiety, distress or worry occurring  
14 around the time of a scan. This included any period before, during or after a scan where the scan was  
15 used as a reference point for the measurement of scanxiety. All non-invasive imaging modalities were  
16 accepted. No date restrictions were applied. Foreign language material was included if an English  
17 translation was available.  
18

19  
20 After initial review of citations and based on increasing familiarity with the literature, and in line with  
21 recommendations on scoping review methodology[12], exclusion criteria were developed *post hoc*.  
22 Exclusion criteria were: studies involving invasive scans (eg transvaginal ultrasound, ultrasound with fine  
23 needle aspirate, or endoscopic ultrasound) due to differences in scan preparation and risk of adverse  
24 events; and, studies of scans performed to investigate a positive initial screening result because the  
25 psychological experiences of asymptomatic persons facing a potential new cancer diagnosis may lead to  
26 higher anxiety than is attributable to scanxiety. Due to feasibility of conducting quantitative and  
27 qualitative analysis with the volume of literature identified, studies reporting only a qualitative  
28 assessment of scanxiety were also excluded, and the objective to explore patient experiences was  
29 abandoned.  
30  
31

32  
33 After removal of duplicate citations, two authors (KTB, RL) independently reviewed and screened  
34 publication titles and abstracts based on the eligibility criteria. Of the studies deemed potentially  
35 eligible, full texts were evaluated for final inclusion. Discrepancies were resolved by discussion between  
36 the two authors (KTB, RL) and were escalated to all authors if a consensus could not be reached.  
37  
38  
39

#### 40 **Step 4: Charting the data**

41  
42 Relevant data were independently extracted by two authors (KTB, RL) into an electronic data extraction  
43 form in Microsoft Excel, which included study demographics and methodology, scanxiety measurement  
44 tools, and the outcome measures of prevalence and severity of scanxiety, contributing factors to  
45 scanxiety, and interventions to reduce scanxiety.  
46  
47  
48

#### 49 **Step 5: Collating, summarizing and reporting the results**

50  
51 Study data was tabulated to assist with a descriptive numerical summary of the range of cancer types,  
52 imaging modalities, study methodology and scanxiety measurement tools. Associations between  
53 scanxiety and potential contributing factors were tabulated if three or more studies reported a  
54 statistical comparison.  
55  
56  
57  
58

1  
2  
3 The prevalence of scanxiety was identified in two ways:  
4

- 5 • The percentage of people who scored above the pre-specified clinically important anxiety  
6 threshold, if reported; or,
- 7 • The percentage of people who scored any degree of anxiety, if no pre-specified threshold was  
8 reported.  
9

10 Severity of scanxiety was defined in three ways:

- 11 • Any mean score of the anxiety measure above the pre-specified clinically important anxiety  
12 threshold, if reported;
- 13 • Any mean score of the anxiety measure that was at least half the total score, if an anxiety  
14 threshold was not reported; or
- 15 • At least 'moderate' anxiety (or its equivalent) on a descriptive range.  
16  
17  
18

19 The definitions of prevalence and severity were purposive-designed to allow descriptive comparisons  
20 between the studies as we anticipated heterogeneity in scanxiety measurement would preclude  
21 meaningful summary statistics.  
22

23 The components of intervention studies and their effect on scanxiety were summarised and reported  
24 descriptively.  
25  
26  
27

## 28 **Step 6: Consultation**

29  
30 Medical oncologists (PB, BK), a behavioural scientist (HD) and a statistician (CB) were consulted for  
31 content expertise to develop the study objectives and to improve clarity on clinically relevant  
32 interpretations of the data.  
33  
34  
35

## 36 **Patient and public involvement**

37  
38 This research did not directly involve patients and public. Our research was initiated by repeated  
39 observations of scanxiety in oncology patients.  
40  
41  
42

## 43 **RESULTS**

44  
45 The study search identified 26,693 citations. The selection process is outlined in **Figure 2**. After removal  
46 of duplicates, abstract and title screening, and full-text review, 57 eligible studies involving 21,352  
47 people were included.  
48  
49  
50

## 51 **Demographics and study details**

52  
53 Observational studies  
54  
55  
56  
57  
58

1  
2  
3 There were 47 observational studies (**Table 1**) involving 19,498 people[15-61]. Participants most  
4 commonly had scans for breast cancer (22 studies,  $n=14,338$  women[16, 18-27, 29, 31, 36, 38, 40, 42,  
5 43, 45, 48, 56, 58]), the most common scans were mammograms (21 studies[16, 18-27, 29, 31, 36, 38,  
6 40, 42, 43, 45, 48, 56]), and most studies used self-report surveys to assess scanxiety (40 studies[15, 16,  
7 18-36, 38, 40-54, 56, 58, 59]).  
8  
9  
10  
11  
12  
13  
14  
15  
16  
17  
18  
19  
20  
21  
22  
23  
24  
25  
26  
27  
28  
29  
30  
31  
32  
33  
34  
35  
36  
37  
38  
39  
40  
41  
42  
43  
44  
45  
46  
47  
48  
49  
50  
51  
52  
53  
54  
55  
56  
57  
58

For peer review only



**Table 1.** Demographics and study details for the 47 observational studies

| First author                    | Year | n    | Country of study     | Cancer type   | Age (years) (Mean <sup>a</sup> )                                               | Female (%) | Married or de facto (%) | At least secondary education (%) | First scan (%) | Scan type              | Reason for scan           | Methods                   |
|---------------------------------|------|------|----------------------|---------------|--------------------------------------------------------------------------------|------------|-------------------------|----------------------------------|----------------|------------------------|---------------------------|---------------------------|
| Andolf[15]                      | 1990 | 275  | Sweden               | Ovarian       | NR                                                                             | 100        | NR                      | NR                               | NR             | Abdominal ultrasound   | Screening                 | Cross-sectional survey    |
| Bull <sup>b,c</sup> [16]        | 1991 | 541  | UK                   | Breast        | 50 to 54: 23%<br>55 to 59s 29%<br>60 to 64: 34%<br>65 to 70: 7%<br>Unknown: 7% | 100        | NR                      | NR                               | NR             | Mammogram              | Screening                 | Longitudinal surveys      |
| Peteet[17]                      | 1992 | 79   | USA                  | Any           | NR                                                                             | NR         | NR                      | NR                               | 4              | CT                     | Any (except screening)    | Cross-sectional interview |
| Cockburn <sup>c</sup> [18]      | 1994 | 200  | Australia            | Breast        | NR                                                                             | 100        | NR                      | NR                               | NR             | Mammogram              | Screening                 | Longitudinal surveys      |
| Ellman <sup>c</sup> [19]        | 1995 | 331  | UK                   | Breast        | 50 to 64: 52%<br>65 to 78: 48%                                                 | 100        | NR                      | NR                               | NR             | Mammogram              | Screening or surveillance | Cross-sectional survey    |
| Sutton <sup>c,d</sup> [20]      | 1995 | 306  | UK                   | Breast        | 58                                                                             | 100        | 76                      | 50                               | NR             | Mammogram              | Screening                 | Longitudinal surveys      |
| Bakker[21]                      | 1998 | 315  | Canada               | Breast        | 61                                                                             | 100        | 71                      | 76                               | 50             | Mammogram              | Screening                 | Longitudinal surveys      |
| Gupta[22]                       | 1999 | 167  | Kuwait               | Breast        | Range 14 to 63                                                                 | 100        | NR                      | 82                               | NR             | Mammogram ± ultrasound | Screening or diagnosis    | Cross-sectional survey    |
| Hafslund[23]                    | 2000 | 170  | Norway               | Breast        | NR                                                                             | 100        | NR                      | NR                               | NR             | Mammogram              | Diagnosis                 | Longitudinal surveys      |
| Meystre-Agostoni[24]            | 2001 | 887  | Switzerland          | Breast        | 50 to 54: 36%<br>55 to 59: 22%<br>60 to 64: 20%<br>65 to 69: 22%               | 100        | 77                      | 62                               | 27             | Mammogram              | Screening                 | Longitudinal surveys      |
| Drossaert[25]                   | 2002 | 2657 | Netherlands          | Breast        | 58                                                                             | 100        | 78                      | 32                               | NR             | Mammogram              | Screening                 | Longitudinal surveys      |
| Sandin <sup>c,d</sup> [26]      | 2002 | 598  | Spain                | Breast        | 51                                                                             | 100        | 77                      | 41                               | NR             | Mammogram              | Screening                 | Longitudinal surveys      |
| Brunton[27]                     | 2005 | 584  | New Zealand          | Breast        | 50 to 54: 38%<br>55 to 59: 35%<br>60 to 64: 27%                                | 100        | NR                      | 74                               | <20%           | Mammogram              | Screening                 | Cross-sectional survey    |
| Geurts[28]                      | 2006 | 106  | Netherlands          | Head and neck | 56                                                                             | 36         | NR                      | 29                               | NR             | Chest X-ray            | Surveillance              | Cross-sectional survey    |
| Tyndel <sup>c</sup> [29]        | 2007 | 1174 | UK                   | Breast        | 43                                                                             | 100        | 83                      | 33                               | 87             | Mammogram              | Screening                 | Longitudinal surveys      |
| Bunge <sup>b</sup> [30]         | 2008 | 324  | Netherlands, Belgium | Lung          | 60                                                                             | 49         | NR                      | NR                               | NR             | CT                     | Screening                 | Longitudinal surveys      |
| Brown Sofair <sup>b</sup> [31]  | 2008 | 47   | USA                  | Breast        | 50                                                                             | 100        | 34                      | 80                               | NR             | Mammogram              | Screening                 | Longitudinal surveys      |
| van den Bergh <sup>b</sup> [32] | 2008 | 324  | Netherlands, Belgium | Lung          | 60                                                                             | 49         | 64                      | 82                               | 66             | CT                     | Screening                 | Longitudinal surveys      |
| Westerterp <sup>b</sup> [33]    | 2008 | 82   | Netherlands          | Oesophageal   | 64                                                                             | 18         | NR                      | NR                               | NR             | CT + PET               | Diagnosis & staging       | Cross-sectional survey    |
| Bastiaannet[34]                 | 2009 | 59   | Netherlands          | Melanoma      | Median: 59                                                                     | 44         | 69                      | 66                               | NR             | CT, PET ± Chest X-ray  | Staging                   | Cross-sectional survey    |
| Vierikko <sup>b</sup> [35]      | 2009 | 601  | Finland              | Lung          | 65                                                                             | 0          | 36                      | NR                               | NR             | CT                     | Screening                 | Longitudinal surveys      |

|    |                            |      |      |                 |                           |            |     |    |    |     |                              |                                    |                           |
|----|----------------------------|------|------|-----------------|---------------------------|------------|-----|----|----|-----|------------------------------|------------------------------------|---------------------------|
| 1  |                            |      |      |                 |                           |            |     |    |    |     |                              |                                    |                           |
| 2  |                            |      |      |                 |                           |            |     |    |    |     |                              |                                    |                           |
| 3  |                            |      |      |                 |                           |            |     |    |    |     |                              |                                    |                           |
| 4  | Bolukbas[36]               | 2010 | 93   | Turkey          | Breast                    | 48         | 100 | 97 | 10 | 45  | Mammogram                    | Screening or diagnosis             | Cross-sectional survey    |
| 5  | Thompson[37]               | 2010 | 70   | USA             | Lymphoma                  | Median: 47 | 64  | 53 | 97 | NR  | CT                           | Surveillance                       | Cross-sectional interview |
| 6  |                            |      |      |                 |                           |            |     |    |    |     |                              |                                    |                           |
| 7  | Hutton <sup>b</sup> [38]   | 2011 | 527  | UK              | Breast                    | Median: 40 | 100 | 79 | NR | 75  | Mammogram ± MRI              | Screening                          | Longitudinal surveys      |
| 8  |                            |      |      |                 |                           |            |     |    |    |     |                              |                                    |                           |
| 9  | Pifarre[39]                | 2011 | 200  | Spain           | Any                       | 52         | 51  | NR | NR | 67  | PET/CT                       | Any (except screening)             | Cross-sectional interview |
| 10 | Steinemann[40]             | 2011 | 227  | USA             | Breast                    | NR         | 100 | NR | NR | NR  | Mammogram                    | Screening or diagnosis             | Cross-sectional survey    |
| 11 |                            |      |      |                 |                           |            |     |    |    |     |                              |                                    |                           |
| 12 | Yu[41]                     | 2011 | 398  | Brazil          | Any                       | 54         | 79  | 56 | 57 | 27  | Any                          | Any (except screening)             | Cross-sectional survey    |
| 13 |                            |      |      |                 |                           |            |     |    |    |     |                              |                                    |                           |
| 14 | Bredart <sup>b</sup> [42]  | 2012 | 637  | France          | Breast                    | 50         | 100 | NR | 87 | NR  | Mammogram ± ultrasound ± MRI | Screening or surveillance          | Longitudinal surveys      |
| 15 |                            |      |      |                 |                           |            |     |    |    |     |                              |                                    |                           |
| 16 | Hafslund <sup>c</sup> [43] | 2012 | 4249 | Norway          | Breast                    | 58         | 100 | NR | 52 | NR  | Mammogram                    | Screening                          | Cross-sectional survey    |
| 17 | Adams <sup>c</sup> [44]    | 2014 | 36   | Netherlands     | Lymphoma                  | 50         | 42  | NR | NR | NR  | CT & MRI                     | Staging                            | Cross-sectional survey    |
| 18 | Baena-Canada[45]           | 2014 | 434  | Spain           | Breast                    | 54         | 100 | 72 | 43 | 18  | Mammogram                    | Screening                          | Cross-sectional survey    |
| 19 | Andersson[46]              | 2015 | 169  | Sweden          | Any                       | 64         | 47  | 62 | 62 | 100 | PET/CT                       | Any (except screening)             | Cross-sectional survey    |
| 20 |                            |      |      |                 |                           |            |     |    |    |     |                              |                                    |                           |
| 21 | Elboga[47]                 | 2015 | 144  | Turkey          | Any                       | 63         | 46  | 83 | 52 | NR  | PET/CT                       | Any (except screening)             | Cross-sectional survey    |
| 22 |                            |      |      |                 |                           |            |     |    |    |     |                              |                                    |                           |
| 23 | Hobbs[48]                  | 2015 | 49   | Australia       | Breast                    | 55         | 100 | 79 | NR | 75  | Mammogram ± MRI              | Diagnosis                          | Longitudinal surveys      |
| 24 | Baum[49]                   | 2016 | 103  | USA             | Lung                      | Median: 67 | 61  | 73 | 53 | NR  | CT, PET ± MRI                | Monitoring                         | Cross-sectional survey    |
| 25 | Abreu[50]                  | 2017 | 232  | Portugal        | Any                       | 61         | 51  | NR | 73 | 71  | PET/CT                       | Any (except screening)             | Longitudinal surveys      |
| 26 |                            |      |      |                 |                           |            |     |    |    |     |                              |                                    |                           |
| 27 | Grilo[51]                  | 2017 | 81   | Spain, Portugal | Any                       | 55         | 53  | NR | 41 | 47  | PET/CT                       | Any (except screening)             | Longitudinal surveys      |
| 28 | Evans[52]                  | 2018 | 115  | UK              | Colorectal or Lung        | 66         | 33  | NR | NR | NR  | Whole body MRI, PET + CT     | Staging                            | Longitudinal surveys      |
| 29 |                            |      |      |                 |                           |            |     |    |    |     |                              |                                    |                           |
| 30 | Goense[53]                 | 2018 | 27   | Netherlands     | Oesophageal               | 64         | 15  | NR | NR | NR  | MRI + PET/CT                 | Staging & monitoring               | Cross-sectional survey    |
| 31 | Hall[54]                   | 2018 | 169  | USA             | Lung                      | 64         | 51  | 58 | 96 | NR  | Low dose CT                  | Screening                          | Cross-sectional survey    |
| 32 | Derry[55]                  | 2019 | 94   | USA             | Any                       | 61         | 72  | NR | 69 | 0   | Any                          | Monitoring                         | Longitudinal interview    |
| 33 | Soriano[56]                | 2019 | 57   | USA             | Breast                    | 58         | 100 | 93 | NR | 0   | Mammogram                    | Surveillance                       | Longitudinal survey       |
| 34 | Taghizadeh[57]             | 2019 | 1237 | Canada          | Lung                      | 63         | 56  | NR | 85 | NR  | CT                           | Screening                          | Longitudinal interview    |
| 35 | Bancroft[58]               | 2020 | 88   | UK, Ireland     | Breast                    | 38         | 61  | 50 | 83 | NR  | MRI                          | Screening                          | Longitudinal survey       |
| 36 |                            |      |      |                 |                           |            |     |    |    |     |                              |                                    |                           |
| 37 | Grilo[59]                  | 2020 | 94   | Portugal        | Any                       | 61         | 54  | NR | 99 | 77  | PET + bone scan              | Staging, monitoring & surveillance | Longitudinal survey       |
| 38 |                            |      |      |                 |                           |            |     |    |    |     |                              |                                    |                           |
| 39 | Morreale[60]               | 2020 | 87   | USA             | Gastrointestinal and Lung | 62         | 55  | NR | 92 | NR  | CT or MRI                    | Monitoring                         | Longitudinal interview    |
| 40 |                            |      |      |                 |                           |            |     |    |    |     |                              |                                    |                           |
| 41 | Paiella[61]                | 2020 | 54   | Italy           | Pancreatic                | 50         | 61  | NR | NR | NR  | MRI – MRCP                   | Screening                          | Cross-sectional interview |
| 42 |                            |      |      |                 |                           |            |     |    |    |     |                              |                                    |                           |
| 43 |                            |      |      |                 |                           |            |     |    |    |     |                              |                                    |                           |
| 44 |                            |      |      |                 |                           |            |     |    |    |     |                              |                                    |                           |
| 45 |                            |      |      |                 |                           |            |     |    |    |     |                              |                                    |                           |
| 46 |                            |      |      |                 |                           |            |     |    |    |     |                              |                                    |                           |
| 47 |                            |      |      |                 |                           |            |     |    |    |     |                              |                                    |                           |

1  
2  
3 UK United Kingdom, USA United States of America, NR not reported, CT computed tomography, PET positron emission tomography, MRI magnetic resonance imaging, MRCP Magnetic resonance  
4 cholangiopancreatography

5 All percentages were rounded to the nearest whole number

6 <sup>a</sup>Unless otherwise stated

7 <sup>b</sup>Demographic data is based on participants who completed the first survey

8 <sup>c</sup>These studies collected data from other groups who were not included in this review as they did not meet eligibility criteria. This included people having invasive procedures such as fine needle  
9 aspirate or open surgical biopsy[16, 33], people with abnormal screening results[18, 26, 29] and people who did not have a scan[18-20, 43]

10 <sup>d</sup>Demographics based on the entire population even if not all participants were eligible for this review.

11 <sup>e</sup>Four paediatric participants were included in this study.  
12  
13  
14  
15  
16  
17  
18  
19  
20  
21  
22  
23  
24  
25  
26  
27  
28  
29  
30  
31  
32  
33  
34  
35  
36  
37  
38  
39  
40  
41  
42  
43

For peer review only

1  
2  
3 Twenty-one studies were conducted in people having scans for screening[15, 16, 18, 20, 21, 24-27, 29-  
4 32, 35, 38, 43, 45, 54, 57, 58, 61]. In the remaining studies, reasons for scanning included diagnosis[23,  
5 48], staging[34, 44, 52], monitoring[49, 55, 60], surveillance to detect recurrence[28, 37, 56] or a  
6 combination of reasons in people with known or suspected cancers (17 studies[17, 39, 41, 46, 47, 50, 51,  
7 53, 59]). Five studies permitted scans for both screening and non-screening reasons (namely,  
8 diagnosis[22, 36, 40] or surveillance[19, 42])  
9

10  
11 The mean age of participants, reported by 33 studies, was 56.9 years (range 38 to 66 years)[20, 21, 25,  
12 26, 28-33, 35, 36, 39, 41-48, 50-61]. The majority of participants were women (87%)[15, 16, 18-61].  
13 When studies involving scans for breast cancer were excluded, there were similar proportions of men  
14 and women (women 49%, men 51%)[15, 27, 28, 30, 32-35, 37, 39, 41, 44, 46, 47, 49-55, 57, 59-61].  
15 There was variation in the reporting and proportion of participants who were married (22 studies, range  
16 34% to 97%[20, 21, 24-26, 29, 31, 32, 34-38, 41, 45-49, 54, 56, 58]), who received at least secondary  
17 education (29 studies, range 10% to 99%[20-22, 24-29, 31, 32, 34, 36, 37, 41-43, 45-47, 49-51, 54, 55,  
18 57-60]) and who were attending their first scan (18 studies, range 0% to 100%[17, 21, 24, 27, 29, 32, 36,  
19 38, 39, 41, 45, 46, 48, 50, 51, 55, 56, 59]).  
20  
21  
22  
23  
24

#### 25 Intervention studies

26  
27 There were ten intervention studies (**Table 2**) involving 1,854 people[62-71]. This included people having  
28 scans for breast cancer (6 studies,  $n=1,449$  people[62-65, 69, 70]) and lung cancer (1 study,  $n=16$   
29 people[68]). Scans included mammogram (5 studies[62-64, 69, 70]), positron emission tomography  
30 (PET) with computed tomography (CT; 3 studies[66, 67, 71]), magnetic resonance imaging (MRI)[65],  
31 CT[68] and ultrasound[70] (1 study each). Four studies involved scans for screening[63, 64, 68, 69], one  
32 for diagnosis[65], three for any reason in people with known or suspected cancers[66, 67, 71], and two  
33 where scans for screening, surveillance and/or diagnosis were permitted[62, 70].  
34  
35

36 The mean age of participants was reported by five studies and ranged from 47 to 65 years[63, 65, 68, 69,  
37 71]. The majority were women (94%[62-66, 68-71]). There was variation in the reporting and proportion  
38 of participants who were married (2 studies, 73% and 75%[64, 65]), received at least secondary  
39 education (6 studies, range 28 to 100%[62-65, 68, 69]), and participants attending their first scan (5  
40 studies, range 4% to 54%[62-64, 66, 71]).  
41  
42

43 Eight studies allocated participants to an intervention or control group[63-69, 71], one study compared  
44 two interventions[62] and one study delivered the intervention to all participants[70]. Two interventions  
45 were multifaceted[64, 65]. Types of interventions included: relaxation, distraction, and/or meditation (6  
46 studies[62, 63, 66, 69-71]); education (4 studies[62, 64, 65, 68]); emotional or psychosocial support (2  
47 studies[64, 65]); or, adjustments to routine logistics of the scan (1 study[67]).  
48  
49  
50  
51  
52  
53  
54  
55  
56  
57  
58

**Table 2.** Demographics and study details for the 10 intervention studies to reduce scanxiety

| First author        | Year | n   | Country of study | Cancer type | Age (years) (Mean <sup>a</sup> )                                   | Female (%) | Married or de facto (%) | At least secondary education (%) | First scan (%) | Scan type              | Reason for scan                      | Allocation                  | Intervention and control groups                                           |
|---------------------|------|-----|------------------|-------------|--------------------------------------------------------------------|------------|-------------------------|----------------------------------|----------------|------------------------|--------------------------------------|-----------------------------|---------------------------------------------------------------------------|
| Mainiero[62]        | 2001 | 613 | USA              | Breast      | < 40: 8%<br>50 to 50: 39%<br>50 to 60: 28%<br>>70: 9%              | 100        | NR                      | 95                               | 7              | Mammogram              | Screening or surveillance            | Consecutive <sup>b</sup>    | Educational or entertaining video in waiting room                         |
| Domar[63]           | 2005 | 143 | USA              | Breast      | 52                                                                 | 100        | NR                      | 81                               | 8              | Mammogram              | Screening                            | Randomised                  | Relaxation, music or blank audiotape in waiting room and during scan      |
| Fernandez-Feito[64] | 2005 | 436 | Spain            | Breast      | 50 to 54: 24%<br>55 to 59: 30%<br>60 to 64: 23%<br>65 to 69: 22%   | 100        | 73                      | 28                               | 4              | Mammogram              | Screening                            | Randomised                  | Pre-scan nursing intervention or usual care                               |
| Caruso[65]          | 2006 | 44  | Italy            | Breast      | 47                                                                 | 100        | 75                      | 89                               | NR             | MRI                    | Diagnosis                            | Randomised                  | Pre-scan informative-emotive psychological support or routine information |
| Vogel[66]           | 2012 | 101 | Netherlands      | Any         | Median: 58                                                         | 51         | NR                      | NR                               | 41             | PET/CT                 | Any (except screening)               | Randomised                  | Audiovisual installation or usual care during FDG uptake                  |
| Acuff[67]           | 2014 | 180 | USA              | Any         | NR                                                                 | NR         | NR                      | NR                               | NR             | PET/CT                 | Any (except screening)               | Unclear                     | Hand-held communication device or usual care during scan                  |
| Raz[68]             | 2014 | 16  | USA              | Lung        | 65                                                                 | 75         | NR                      | 100                              | NR             | CT                     | Screening                            | Sequential <sup>c</sup>     | Pre-scan multimedia education or usual care                               |
| Zavotsky[69]        | 2014 | 100 | USA              | Breast      | 54                                                                 | 100        | NR                      | 98                               | NR             | Mammogram              | Screening                            | Non-randomised <sup>d</sup> | Music or no music during scan                                             |
| Ashton[70]          | 2019 | 113 | USA              | Breast      | 18 to 39: 3.6%<br>40 to 59: 51.8%<br>60 to 79: 39.3%<br>> 80: 5.4% | 100        | NR                      | NR                               | NR             | Mammogram ± ultrasound | Screening, surveillance or diagnosis | NA <sup>e</sup>             | Shoulder & neck massage ± hand massage                                    |
| Lorca[71]           | 2019 | 108 | Spain            | Any         | 59                                                                 | 57         | NR                      | NR                               | 54             | PET/CT                 | Any (except screening)               | Randomised                  | Mindfulness meditation or usual care during FDG uptake                    |

USA United States of America, NR not reported, MRI magnetic resonance imaging, PET positron emission tomography, CT computed tomography, FDG fluorodeoxyglucose

All percentages were rounded to the nearest whole number

<sup>a</sup>Unless otherwise stated

<sup>b</sup>Each intervention was administered during one half of the study period

<sup>c</sup>Participants were enrolled into the control arm first, followed by the intervention arm

<sup>d</sup>Participants attending on Mondays, Wednesdays and Fridays were allocated to the intervention arm, and participants attending on Tuesdays and Thursdays were allocated to the control arm

<sup>e</sup>All participants received the intervention

## Scanxiety measurement

Anxiety measurements varied across the studies, with different measurement tools, variants of the same tool, and different range and thresholds applied to tools.

### Observational studies

The 47 observational studies (**Table 3**) used a total of 81 measures of anxiety, with 30 studies using one measure only[15-19, 21, 22, 25-28, 30, 33, 34, 36, 39, 40, 43, 44, 46, 48-51, 53, 55-57, 59, 61], and 17 studies using at least two measures[20, 23, 24, 29, 31, 32, 35, 37, 38, 41, 42, 45, 47, 52, 54, 58, 60].

The most common measures used were: purpose-designed Likert scales (17 studies); the State-Trait Anxiety Inventory (STAI) (14 studies); the anxiety subscale of the Hospital Anxiety and Depression Scale (HADS) (9 studies); the Impact of Event Scale (IES) (6 studies); the Psychological Consequences Questionnaire (PCQ) (3 studies), the Cancer Worry Scale (3 studies), and; the Perceived Stress Scale (2 studies). There were 17 measures used by one study only[15, 20, 22, 26, 31, 32, 35, 52, 54, 56, 58, 60].

Likert scales were varied, with a numerical lower range limit of 0 or 1, and an upper range limit between 3 and 12[17, 20, 24, 25, 33, 40, 44, 46, 48, 50, 52, 53]. Seven studies used a descriptive range[21, 25, 27, 28, 33, 34, 55]. Two studies used both a numerical and a descriptive range[25, 33].

The STAI comprises State and Trait Anxiety subscales with a possible subscale range of 20 to 80. It has no validated anxiety threshold and is usually calculated as a sum of 4-point response options[72]. Included studies used and reported the STAI as a total score[37, 39], using one or both subscales[20, 23, 36, 37, 41, 42, 47, 51, 57, 59], or as a variant (e.g. STAI-6[32, 38, 58]). There were different ranges: none reported[47, 57]; no reported lower limit[41]; no reported upper limit[36]; 0 to 60[39, 51], or; based on a mean of individual item scores[20]. Some studies pre-specified an anxiety threshold of 39[57], 40[37, 41], 46[42], calculated based on the relationship between the anxiety and trait subscales[39], or based on investigator-determined categories[36]. One study used a different method to calculate scores (ie subtracting the points of reversed statements from direct statements, which were valued at 1, 2, 3 and 20, and then added to a constant of 50[36]).

The HADS Anxiety subscale has a range of 0 to 21 and a validated anxiety threshold of 11[73]. One study reported a range of 0 to 14[38], one study reported anxiety categories rather than a threshold[60], two studies reported an anxiety threshold of 8[41, 43] and one study reported an anxiety threshold of 10 (though there was overlap the 'tendency to anxiety' and 'anxiety' categories, classified as scores of 8 to 10 and 10 or more, respectively)[47].

The IES was used in its original form[30, 32, 38, 42, 58] or as a variant (IES-6[49]), and was reported as a total score[30, 32, 38, 49] or as Intrusion and Avoidance subscale scores[42, 58]. The two studies using subscale scores reported threshold levels of 20 or 21[42] and 8.5[58]. When using the PCQ, researchers used either the Emotional subscale[18] or the Negative Consequences subscale[24, 29]. The Cancer Worry Scale and the Perceived Stress Scale were used in original[45, 61] or variant[29, 54, 58] forms. The Symptom Checklist-90-Revised score could not be interpreted because the authors did not report a range[31], and a raw score or a transformed score could have been used[74].

**Table 3.** Prevalence and severity of scanxiety

| Author               | Year     | Measurement                                              | Range (Anxiety threshold) | Timing of scanxiety assessment                                    | Prevalence (%)                           | Severity (Mean <sup>a</sup> )         | Pre- & post-scan comparison                               |
|----------------------|----------|----------------------------------------------------------|---------------------------|-------------------------------------------------------------------|------------------------------------------|---------------------------------------|-----------------------------------------------------------|
| Andolf[15]           | 1990     | Visual analogue scale                                    | 0-100 (NA)                | Post-scan: 1-3 years                                              | 81                                       | Median 3.5                            | NA                                                        |
| Bull[16]             | 1991     | HADS: Anxiety subscale                                   | 0-21 (≥11) <sup>b</sup>   | Pre-scan: specific timing NR                                      | 4.9                                      | 4.97                                  | Less severe post-scan scanxiety, p<0.001                  |
|                      |          |                                                          |                           | Post-scan: post-result, specific timing NR                        | 4                                        | 4.43                                  |                                                           |
| Peteet[17]           | 1992     | 10-point Likert scale                                    | 1-10 (NA)                 | Post-scan: specific timing NR                                     | NR                                       | First scan 5.5, Recent scan 3.5       | NA                                                        |
| Cockburn[18]         | 1994     | PCQ: Emotional subscale                                  | 0-15 (NA)                 | Pre-scan: day of scan                                             | NR                                       | <2                                    | No difference                                             |
|                      |          |                                                          |                           | Post-scan: pre-results, 1-week post-result & at 8 months          | NR                                       | <2                                    |                                                           |
| Ellman[19]           | 1995     | HADS: Anxiety subscale                                   | 0-21 (≥11)                | Pre-scan: day of scan                                             | 6                                        | NR                                    | NA                                                        |
| Sutton[20]           | 1995     | STAI: State Anxiety subscale                             | 1-4# (NA)                 | Pre-scan: at invitation to screening, specific timing NR          | NR                                       | Between 1.65 and 1.95                 | No significant differences scanxiety at any time point    |
|                      |          |                                                          |                           | Peri-scan: day of scan                                            | NR                                       |                                       |                                                           |
|                      |          |                                                          |                           | Post-scan: 9 months                                               | NR                                       |                                       |                                                           |
|                      |          | STAI: Trait Anxiety subscale                             | 1-4# (NA)                 | Pre-scan: at invitation to screening, specific timing NR          | NR                                       | Between 1.65 and 1.95                 | No significant differences in scanxiety at any time point |
|                      |          |                                                          |                           | Peri-scan: day of scan                                            | NR                                       |                                       |                                                           |
|                      |          |                                                          |                           | Post-scan: 9 months                                               | NR                                       |                                       |                                                           |
|                      |          | GHQ: Anxiety subscale                                    | 0-3 (NA)                  | Pre-scan: at invitation to screening, specific timing NR          | NR                                       | <1                                    | Less severe post-scan scanxiety, p<0.001                  |
|                      |          |                                                          |                           | Post-scan: 9 months                                               | NR                                       |                                       |                                                           |
| 3-point Likert scale | 1-3 (NA) | Pre-scan: at invitation to screening, specific timing NR | NR                        | <2                                                                | Less severe post-scan scanxiety, p<0.001 |                                       |                                                           |
|                      |          | Post-scan: 9 months                                      | NR                        |                                                                   |                                          |                                       |                                                           |
| Bakker[21]           | 1998     | 5-point Likert scale                                     | Descriptive range (NA)    | Post-scan: immediate & at 3 weeks                                 | 39-40                                    | Somewhat, very or extremely: 9 to 15% | NA                                                        |
| Gupta[22]            | 1999     | HSCL-25                                                  | 0-3 (NA)                  | Post-scan: specific timing NR                                     | 40                                       | Moderate to severe: 25%               | NA                                                        |
| Hafslund[23]         | 2000     | STAI: State Anxiety subscale                             | 20-80 (NA)                | Pre-scan: day of scan                                             | NR                                       | 35.5                                  | No statistical comparison reported                        |
|                      |          |                                                          |                           | Post-scan: day of scan                                            | NR                                       | 32.1                                  |                                                           |
|                      |          | STAI: Trait Anxiety subscale                             | 20-80 (NA)                | Pre-scan: day of scan                                             | NR                                       | 35.9                                  | No statistical comparison reported                        |
|                      |          |                                                          |                           | Post-scan: day of scan                                            | NR                                       | NR                                    |                                                           |
| Meystre-Agustoni[24] | 2001     | PCQ: Negative consequences subscale                      | 0-36 (NA)                 | Pre-scan: day of scan                                             | NR                                       | <1                                    | No statistical comparison reported                        |
|                      |          |                                                          |                           | Post-scan: pre- result, 2 weeks post-result & 8 weeks post-result | NR                                       | <2                                    |                                                           |
|                      |          | 6-point Likert scale                                     | 0-5 (NA)                  | Pre-scan: immediate                                               | 26                                       | <1                                    |                                                           |
|                      |          |                                                          |                           | Post-scan: pre-result, 2 weeks post-result & 8 weeks post-result  | NR                                       | <1                                    |                                                           |
| Drossaert[25]        | 2002     | Composite 7-item score of 4-point Likert scales          | 1-4 (NA)                  | Baseline: 8 weeks post-first scan                                 | NR                                       | 1.6                                   | No statistical comparison reported                        |
|                      |          |                                                          |                           | Pre-scan: 6 weeks (second & third scans)                          | NR                                       | 1.6 to 1.7                            |                                                           |

|                         |          |                                     |                                   |                                                        |               |                                    |                                                                                    |
|-------------------------|----------|-------------------------------------|-----------------------------------|--------------------------------------------------------|---------------|------------------------------------|------------------------------------------------------------------------------------|
|                         |          |                                     |                                   | Post-scan: 6 weeks (second & third scans)              | NR            | 1.5                                |                                                                                    |
|                         |          |                                     | Descriptive range (NA)            | Baseline: 8 weeks post-first scan                      | NR            | Moderate to severe: 10%            | NA                                                                                 |
| Sandin[26]              | 2002     | HSC-90-R: Anxiety subscale          | 0-4 (NA)                          | Pre-scan: day of scan                                  | NR            | 0.41                               | No statistical comparison reported                                                 |
|                         |          |                                     |                                   | Post-scan: 2 weeks                                     | NR            | 0.28                               |                                                                                    |
| Brunton[27]             | 2005     | 4-point Likert scale, 3 items       | Descriptive range (NA)            | Post-scan: within 4 years                              | 56-77         | Quite or very: 11 to 28%           | NA                                                                                 |
| Geurts[28]              | 2006     | 4-point Likert scale                | 1-4 (NA)                          | Peri-scan: specific timing NR                          | 61            | Moderate to severe: 21%            | NA                                                                                 |
| Tyndel[29]              | 2007     | PCQ: Negative consequences subscale | 0-36 (NA)                         | Pre-scan: 1 month                                      | NR            | 5.1                                | Less severe post-scan scanxiety, p=0.000                                           |
|                         |          |                                     |                                   | Post-scan: 1-month post- result & 6-months post-result | NR            | 3.8 to 4.2                         |                                                                                    |
|                         |          | Cancer Worry Scale - Revised        | 6-24 (NA)                         | Pre-scan: 1 month                                      | NR            | 11.0                               | Less severe post-scan scanxiety, p=0.000                                           |
|                         |          |                                     |                                   | Post-scan: 1-month post- result & 6-months post-result | NR            | 10.1 to 10.6                       |                                                                                    |
| Bunge[30]               | 2008     | IES in low affective risk people    | 0-75 (NA)                         | Pre-scan: 1 day                                        | NR            | 5.6                                | Less severe post-scan scanxiety in both low and high affective risk groups, p<0.05 |
|                         |          |                                     |                                   | Post-scan: 6 months                                    | NR            | 4.3                                |                                                                                    |
|                         |          | IES in high affective risk people   | 0-75 (NA)                         | Pre-scan: 1 day                                        | NR            | 14.7                               |                                                                                    |
|                         |          |                                     |                                   | Post-scan: 6 months                                    | NR            | 10.3                               |                                                                                    |
| Brown Sofair[31]        | 2008     | Penn State Worry Questionnaire      | 16-80 (60)                        | Pre-scan: within 1 month                               | NR            | 50.18                              | No statistical comparison reported                                                 |
|                         |          |                                     |                                   | Post-scan: day of scan (post-result)                   | NR            | NR                                 |                                                                                    |
|                         |          | SCL-90-R: Anxiety subscale          | NR (NA)                           | Pre-scan: within 1 month                               | NR            | 48.75                              | No difference                                                                      |
|                         |          |                                     |                                   | Post-scan: day of scan (post-result)                   | NR            | 42.07                              |                                                                                    |
| van den Bergh[32]       | 2008     | STAI-6                              | 20-80 (NA)                        | Pre-scan: 1 day                                        | NR            | 34.1                               | Less severe post-scan scanxiety, p<0.01                                            |
|                         |          |                                     |                                   | Post-scan: within 1 week & at 6 months                 | NR            | 32.7 to 34.3                       |                                                                                    |
| Westerterp[33]          | 2008     | 5-point Likert scale                | 1-5 (NA)                          | Post-scan (after both scans): 2 weeks                  | NR            | CT 1.2, PET 1.4                    | NA                                                                                 |
|                         |          |                                     |                                   | Post-scan (after both scans): 2 weeks                  | CT 13, PET 23 | Moderate to severe: CT 4%, PET 10% |                                                                                    |
|                         |          | Health anxiety inventory            | 0-24 (NA)                         | Pre-scan: specific timing NR                           | NR            | 6.7                                | Less severe post-scan scanxiety, p<0.001                                           |
|                         |          |                                     |                                   | Post-scan: 1 year                                      | NR            | 5.8                                |                                                                                    |
| Worry about lung cancer | 0-8 (NA) | Pre-scan: specific timing NR        | NR                                | 3.0                                                    | No difference |                                    |                                                                                    |
|                         |          | Post-scan: 1 year                   | NR                                | 3.1                                                    |               |                                    |                                                                                    |
| Bolukbas[36]            | 2010     | STAI: State Anxiety subscale        | 0-NR (20-39 mild, 40-59 moderate, | Peri-scan: specific timing NR                          | NR            | 46.2                               | NA                                                                                 |



|                  |      |                                        |                                                         |                                                      |                      |                                          |                                                                          |
|------------------|------|----------------------------------------|---------------------------------------------------------|------------------------------------------------------|----------------------|------------------------------------------|--------------------------------------------------------------------------|
|                  |      |                                        | 60-79 severe, ≥ 80 help needed)#                        |                                                      |                      |                                          |                                                                          |
| Thompson[37]     | 2010 | STAI                                   | 40-160 (NA)                                             | Post-scan: specific timing NR                        | 37                   | 65.8                                     | NA                                                                       |
|                  |      | STAI: State Anxiety subscale           | 20-80 (≥40)#                                            | Post-scan: specific timing NR                        | NR                   | 30.4                                     | NA                                                                       |
|                  |      | STAI: Trait Anxiety subscale           | 20-80 (≥40)#                                            | Post-scan: specific timing NR                        | NR                   | 35.4                                     | NA                                                                       |
| Hutton[38]       | 2011 | HADS: Anxiety subscale                 | 0-14 (≥11)#                                             | Baseline: 4 weeks pre-first scan                     | 20                   | 6.9                                      | No difference                                                            |
|                  |      |                                        |                                                         | Pre-scan: day of each scan (for 5 scans)             | MRI 17, Mammogram 20 | MRI 5.2 to 6.5, Mammogram 5.0 to 6.5     |                                                                          |
|                  |      |                                        |                                                         | Post-scan: 6 weeks (for 5 scans)                     | 10 to 13             | 5.1 to 5.9                               |                                                                          |
|                  |      | STAI-6                                 | 20-80 (NA)                                              | Pre-scan: day of scan (for 5 scans)                  | NR                   | MRI 10.8 to 12.1, Mammogram 10.1 to 11.3 | Less severe post-scan scanxiety for MRI (p<0.0005) & mammogram (p=0.002) |
|                  |      |                                        |                                                         | Post-scan: day of scan (for 5 scans)                 | NR                   | MRI 9.6 to 10.7, Mammogram 9.7 to 10.5   |                                                                          |
|                  |      | IES                                    | 0-75 (NA)                                               | Post-scan: 6 weeks (for 5 scans)                     | NR                   | MRI 17.8 to 19.3, Mammogram 17.2 to 18.6 | NA                                                                       |
| Pifarre[39]      | 2011 | STAI                                   | 0-60 for each subscale (state more than 10 than trait)# | Pre-scan: day of scan                                | 68                   | NR                                       | NA                                                                       |
| Steinemann[40]   | 2011 | 7-point Likert scale                   | 1-7 (NA)                                                | Pre-scan: day of scan                                | NR                   | 4.1                                      | NA                                                                       |
| Yu[41]           | 2011 | HADS: Anxiety subscale                 | 0-21 (≥8)#                                              | Pre-scan: day of scan                                | 38                   | NR                                       | NA                                                                       |
|                  |      | STAI: State Anxiety subscale           | NR-80 (≥40)#                                            | Pre-scan: day of scan                                | 46                   | 39.4                                     | NA                                                                       |
|                  |      | STAI: Trait Anxiety subscale           | NR-80 (≥40)#                                            | Pre-scan: day of scan                                | 46                   | 39.9                                     | NA                                                                       |
|                  |      | Dichotomous reporting <sup>c</sup>     | Yes/No (NA)                                             | Pre-scan: day of scan                                | 41                   | NR                                       | NA                                                                       |
| Bredart[42]      | 2012 | STAI: State Anxiety subscale           | 20-80 (≥46)#                                            | Pre-scan: 1 week                                     | NR                   | MRI 42.1, Mammogram 41.1                 | No statistical comparison reported                                       |
|                  |      |                                        |                                                         | Post-scan: day of scan & between 15 days to 3 months | NR                   | MRI 34.9, 40.8, Mammogram 34.3, 38.8     |                                                                          |
|                  |      | IES: Intrusion subscale                | 0-35 (≥20)#                                             | Pre-scan: 1 week                                     | NR                   | MRI 8.9, Mammogram 8.4                   | No statistical comparison reported                                       |
|                  |      |                                        |                                                         | Post-scan: day of scan & between 15 days to 3 months | NR                   | MRI 8.5, Mammogram 7.7                   |                                                                          |
|                  |      | IES: Avoidance subscale                | 0-40 (≥21)#                                             | Pre-scan: 1 week                                     | NR                   | MRI 12.1, Mammogram 9.8                  | No statistical comparison reported                                       |
|                  |      |                                        |                                                         | Post-scan: day of scan & between 15 days to 3 months | NR                   | MRI 11.8, Mammogram 8.9                  |                                                                          |
| Hafslund[43]     | 2012 | HADS: Anxiety subscale                 | 0-21 (≥8)#                                              | Pre-scan: within 2 weeks                             | 15                   | 4.1                                      | NA                                                                       |
| Adams[44]        | 2014 | 4-point Likert scale                   | 1-4 (NA)                                                | Post-scan: day of scan (after each scan)             | NR                   | MRI 1.5, CT 1.8                          | NA                                                                       |
| Baena-Canada[45] | 2014 | HADS: Anxiety subscale                 | 0-21 (≥11)                                              | Post-scan: specific timing NR                        | 4                    | 1.86                                     | NA                                                                       |
|                  |      | Cancer Worry Scale                     | 6-24 (NA)                                               | Post-scan: specific timing NR                        | NR                   | 9.4                                      | NA                                                                       |
| Andersson[46]    | 2015 | Sum of 3 items on 5-point Likert scale | 0-12 (NA)                                               | Post-scan: within four weeks                         | NR                   | 4                                        | NA                                                                       |
| Elboga[47]       | 2015 | HADS: Anxiety subscale                 | 0-21 (≥10)                                              | Pre-scan: day of scan                                | NR                   | 9.2                                      | NA                                                                       |

|                      |           |                                     |                        |                                                          |                                           |                                                  |                                                                           |
|----------------------|-----------|-------------------------------------|------------------------|----------------------------------------------------------|-------------------------------------------|--------------------------------------------------|---------------------------------------------------------------------------|
|                      |           | STAI: State Anxiety subscale        | NR (NA)                | Pre-scan: day of scan                                    | NR                                        | 40.4                                             | NA                                                                        |
|                      |           | STAI: Trait Anxiety subscale        | NR (NA)                | Pre-scan: day of scan                                    | NR                                        | 46.6                                             | NA                                                                        |
| Hobbs[48]            | 2015      | 5-point Likert scale                | 1-5 (NA)               | Post-scan (after both scans), specific timing NR         | Mammogram 17, MRI 44                      | NR                                               | NA                                                                        |
| Baum[49]             | 2016      | IES-6                               | 0-24 (NA)              | Post-scan: specific timing NR                            | 83                                        | 6.4                                              | NA                                                                        |
| Abreu[50]            | 2017      | 10-point Likert scale               | 1-10 (NA)              | Pre-scan: day of scan                                    | NR                                        | 6.4                                              | Less severe post-scan scanxiety, p=0.000                                  |
|                      |           |                                     |                        | Post-scan: day of scan                                   | NR                                        | 5.7                                              |                                                                           |
| Grilo[51]            | 2017      | STAI: State Anxiety subscale        | 0-60 (NA)              | Pre-scan: day of scan                                    | NR                                        | 31.1                                             | More severe post-scan scanxiety, p=0.000                                  |
|                      |           |                                     |                        | Post-scan: day of scan                                   | NR                                        | 33.0                                             |                                                                           |
| Evans[52]            | 2018      | GHQ-12                              | 0-12 (≥4)              | Peri-scans: specific timing NR                           | 42                                        | NR                                               | NA                                                                        |
|                      |           | 7-point Likert scale                | 1-7 (NA)               | Post-scan: 1 month                                       | NR                                        | MRI 2.5, CT or PET/CT 2.2                        | NA                                                                        |
| Goense[53]           | 2018      | 5-point Likert scale                | 1-5 (NA)               | Post-scan (after both scans): day of scan                | NR                                        | MRI 1.0, PET 1.0                                 | NA                                                                        |
| Hall[54]             | 2018      | Generalized Anxiety Disorder 2-item | 0-6 (≥3)               | Peri-scan: specific timing NR                            | 26                                        | 1.62                                             | NA                                                                        |
|                      |           | Perceived Stress Scale 4            | 0-16 (NA)              | Peri-scan: specific timing NR                            | NR                                        | 5.14                                             | NA                                                                        |
| Derry[55]            | 2019      | 4-point Likert scale                | Descriptive range (NA) | Peri-scan: pre-result                                    | NR                                        | 'A great deal' or 'completely': 23%              | NA                                                                        |
| Soriano[56]          | 2019      | PROMIS Anxiety Short Form           | 1-5 (NA)               | Pre-scan: two weeks                                      | NR                                        | 1.55                                             | NA                                                                        |
| Taghizadeh[57]       | 2019      | STAI: State Anxiety subscale        | NR (39)                | Baseline                                                 | NR                                        | 30.9                                             | More severe post-scan scanxiety, p<0.001                                  |
|                      |           |                                     |                        | Post-scan: one-month post-result & at 12 months          | NR                                        | 33.1, 31.7                                       |                                                                           |
| Bancroft[58]         | 2020      | HADS: Anxiety subscale              | 0-21 (11)              | Baseline                                                 | Carriers <sup>d</sup> : 14<br>Controls: 7 | Carriers: 6.2<br>Controls: 4.9                   | No difference in prevalence<br>Less severe post-scan in carriers (p=0.04) |
|                      |           |                                     |                        | Post-scan: pre-results, at 12 weeks, 26 weeks & 52 weeks | Carriers: 5 to 14<br>Controls: 2 to 7     | Carriers: 5.3 to 5.9<br>Controls: 4.1 to 4.6     |                                                                           |
|                      |           | Cancer Worry Scale – Revised        | 8-32 (NA)              | Baseline                                                 | NR                                        | Carriers: 14.4<br>Controls: 12.2                 | No difference                                                             |
|                      |           |                                     |                        | Post-scan: at 12 weeks, 26 weeks & 52 weeks              | NR                                        | Carriers: 13.6 to 14.7<br>Controls: 11.9 to 12.1 |                                                                           |
|                      |           | IES-cancer: Intrusion subscale      | 0-35 (8.5)             | Post-scan: pre-results, at 12 weeks, 26 weeks & 52 weeks | Carriers: 35 to 58<br>Controls: 5 to 13   | Carriers: 8.3 to 11.4<br>Controls: 1.7 to 3.0    | NA                                                                        |
|                      |           | IES-cancer: Avoidance subscale      | 0-40 (8.5)             | Post-scan: pre-results, at 12 weeks, 26 weeks & 52 weeks | Carriers: 55 to 64<br>Controls: 12 to 37  | Carriers: 9.9 to 13.3<br>Controls: 2.6 to 7.0    | NA                                                                        |
|                      |           | IES-MRI: Intrusion subscale         | 0-35 (8.5)             | Post-scan: at 12 weeks, 26 weeks & 52 weeks              | Carriers: 4 to 7<br>Controls: 0 to 3      | Carriers: 1.2 to 3.1<br>Controls: 0.1 to 0.5     | NA                                                                        |
|                      |           | IES-MRI: Avoidance subscale         | 0-40 (8.5)             | Post-scan: at 12 weeks, 26 weeks & 52 weeks              | Carriers: 14<br>Controls: 8               | Carriers: 1.8<br>Controls: 2.8                   | NA                                                                        |
|                      |           | STAI-6                              | 6-24 (NA)              | Pre-scan: day of scan                                    | NR                                        | Carriers: 7.2<br>Controls: 7.3                   | NA                                                                        |
| Health Questionnaire | 0-14 (NA) | Baseline                            | NR                     | Carriers: 7.0<br>Controls: 6.8                           | No difference                             |                                                  |                                                                           |

|              |      |                              |                                                        |                                                          |    |                                               |                                                                                |
|--------------|------|------------------------------|--------------------------------------------------------|----------------------------------------------------------|----|-----------------------------------------------|--------------------------------------------------------------------------------|
|              |      |                              |                                                        | Post-scan: pre-results, at 12 weeks, 26 weeks & 52 weeks | NR | Carriers: 7.1 to 8.1<br>Controls: 6.9, to 7.7 |                                                                                |
| Grilo[59]    | 2020 | STAI: State Anxiety subscale | 20-80 (NA)                                             | Pre-scan: day of scan                                    | NR | Bone scan: 51.75<br>PET/CT: 44.76             | Less severe post-scan scanxiety for both: Bone scan. p=0.02<br>PET/CT, p<0.001 |
|              |      |                              |                                                        | Post-scan: day of scan                                   | NR | Bone scan: 36.70<br>PET/CT: 38.82             |                                                                                |
| Morreale[60] | 2020 | Distress thermometer         | 0-10 (4)                                               | Peri-scan: day of scan                                   | NR | 3.73                                          | No statistical comparison                                                      |
|              |      |                              |                                                        | Post-scan: one-week post-result                          | NR | 3.91                                          |                                                                                |
|              |      | HADS: Anxiety subscale       | 0-21 (0-7 none, 8-10 mild, 11-14 moderate, 15-21 high) | Peri-scan: day of scan                                   | NR | 6.12                                          | No statistical comparison                                                      |
|              |      |                              |                                                        | Post-scan: one-week post-result                          | NR | 5.32                                          |                                                                                |
| Paiella[61]  | 2020 | Perceived Stress Scale       | 0-40 (15-18 moderate, ≥ 19 high)                       | Post-scan: pre-result                                    | NR | 14.8                                          | NA                                                                             |

NA not applicable, NR not reported, HADS Hospital Anxiety and Depression Scale, PCQ Psychological Consequences Questionnaire, STAI State-Trait Anxiety Inventory, GHQ General Health Questionnaire, HSCL Hopkins Symptom Checklist, IES Impact of Event Scale, SCL-90-R Symptom Checklist-90-Revised, HSCL-90-R Hopkins Symptom Checklist 90-Revised, PROMIS Patient-Reported Outcomes Measurement Information System, CT computed tomography, PET positron emission tomography, MRI magnetic resonance imaging  
All percentages were rounded to the nearest whole number

<sup>a</sup>Unless otherwise described

<sup>b</sup>This study did not specify an anxiety threshold; however, the Anxiety subscale of the Hospital Anxiety and Depression Scale has validated thresholds. These thresholds were included in this table

<sup>c</sup>Dichotomous reporting assumed given description of question (self-perception of anxiety) and results "40.5% of the patients considered themselves to be anxious"[41]

<sup>d</sup>This study included participants who were *TP53* mutation carriers, and population controls

### Intervention studies

The ten intervention studies (**Table 4**) used 19 measures of anxiety, with five studies using one measure only[62, 66, 67, 69, 70], and five studies at least two[63-65, 68, 71]. The measures included subscales of the STAI (7 studies), Likert scales (5 studies), a variant of the Psychological Consequences Questionnaire (1 study[68]) and the Crown Crisp Experimental Index (1 study[65]).

Likert scales were varied, with a lower range limit of 0 or 1, and an upper range limit between 5 and 10[62, 63, 69-71]. The STAI was used and reported using one or both subscales[63-65, 67, 68, 71], or as a variant (8-item STAI[66]). There was variation from the usual STAI parameters, with studies using a different range (i.e. not reported[63, 65], 0 to 60[64], or 18 to 32[66]) or pre-specified anxiety thresholds of 40[68] or 16[66].

### Scanxiety outcomes

Prevalence and severity of scanxiety for each study are provided in **Table 3**. Summary statistics for prevalence and severity were not calculated due to heterogeneity in the type and timing of measurement between the studies.

#### Prevalence of scanxiety

Twenty-four of the 47 studies reported the prevalence of scanxiety. The prevalence of scanxiety ranged between 0% and 64% across the 16 measures with pre-specified anxiety thresholds[16, 19, 31, 38, 41, 43, 45, 52, 54, 58], though eight of these measures came from only two studies[41, 58]. The prevalence of scanxiety ranged between 13% and 83% using the 14 measures without pre-specified anxiety thresholds[15, 21, 22, 24, 27, 28, 32-34, 37, 39, 41, 48, 49].

There were insufficient numbers to compare the prevalence of scanxiety using measures with pre-specified anxiety thresholds of people having scans for screening (11 measures[16, 31, 38, 43, 45, 54, 58]), reasons other than screening (four measures[41, 52]) and for screening or non-screening reasons (1 measure[19]). When no threshold was reported, the prevalence of scanxiety had a similar range (screening 23% to 81%, five measures[15, 21, 24, 27, 32]; reasons other than screening 14% to 83%, eight measures[28, 33, 34, 37, 39, 41, 48, 49]; either screening or reasons other than screening (40%, one measure[22]).

#### Severity of scanxiety

Severity of scanxiety was reported in 44 of 47 observational studies. Mean severity scores appeared low in almost all measures which quantitatively measured scanxiety (54/62, 87%).

**Table 4.** Effect of interventions to reducing scanxiety

| First author                 | Year      | Intervention                                                                                                                                                                                                           | Scanxiety measurement                  | Range (Anxiety threshold) | Timing of scanxiety assessment                                                    | Impact of intervention on scanxiety                                         | P-value |                                         |                                             |             |
|------------------------------|-----------|------------------------------------------------------------------------------------------------------------------------------------------------------------------------------------------------------------------------|----------------------------------------|---------------------------|-----------------------------------------------------------------------------------|-----------------------------------------------------------------------------|---------|-----------------------------------------|---------------------------------------------|-------------|
| Mainiero[62]                 | 2001      | Arm A: an educational video about breast cancer and mammography<br>Arm B: an entertaining movie (from the 1940s to 1960s)                                                                                              | 6-point Likert score                   | 0-5 (NA)                  | Pre-scan: immediate<br>Post-scan: immediate                                       | No difference                                                               | NR      |                                         |                                             |             |
| Domar[63]                    | 2005      | Arm A: relaxation audiotape, or;<br>Arm B: music audiotape, or;<br>Arm C: control (blank audiotape)                                                                                                                    | STAI: State Anxiety subscale           | NR (NA)                   | Pre-scan: immediate                                                               | No difference<br>Arm A v Arm B v Arm C: 34.8 v 33.6 v 33.2                  | 0.18    |                                         |                                             |             |
|                              |           |                                                                                                                                                                                                                        |                                        |                           | Post-scan: immediate                                                              | No difference<br>Arm A v Arm B v Arm C: 30.4 v 30.9 v 33.2                  | 0.78    |                                         |                                             |             |
|                              |           |                                                                                                                                                                                                                        | STAI: Trait Anxiety subscale           | NR (NA)                   | Pre-scan: immediate                                                               | No difference<br>Arm A v Arm B v Arm C: 32.6 v 32.7 v 32.5                  | 0.99    |                                         |                                             |             |
|                              |           |                                                                                                                                                                                                                        | 11-point Likert scale                  | 1-10 (NA)                 | Post-scan                                                                         | No difference<br>Arm A v Arm B v Arm C: 2.6 v 3.2 v 2.8                     | 0.43    |                                         |                                             |             |
|                              |           |                                                                                                                                                                                                                        |                                        |                           | Post-scan: immediate                                                              | NR                                                                          | NR      |                                         |                                             |             |
| Fernandez-Feito[64]          | 2005      | Arm A: A protocolised nursing intervention (information and emotional support) and usual care, or;<br>Arm B: Usual care alone                                                                                          | STAI: State Anxiety subscale           | 0-60 (NA)                 | Pre-scan: immediate (post-intervention)                                           | Less severe                                                                 | <0.001  |                                         |                                             |             |
|                              |           |                                                                                                                                                                                                                        |                                        |                           |                                                                                   | Less severe if fear of cancer present                                       | 0.002   |                                         |                                             |             |
|                              |           |                                                                                                                                                                                                                        |                                        |                           |                                                                                   | Less severe if no fear of cancer present                                    | 0.003   |                                         |                                             |             |
|                              |           |                                                                                                                                                                                                                        |                                        |                           |                                                                                   | No difference if fear of cancer outcome present                             | 0.09    |                                         |                                             |             |
|                              |           |                                                                                                                                                                                                                        | Less severe if no fear of scan outcome | <0.001                    |                                                                                   |                                                                             |         |                                         |                                             |             |
| STAI: Trait Anxiety subscale | 0-60 (NA) | Pre-scan: immediate (post-intervention)                                                                                                                                                                                | No difference                          | 0.34                      |                                                                                   |                                                                             |         |                                         |                                             |             |
| Caruso[65]                   | 2006      | Arm A: routine information and 45 minutes of informative-emotive psychological support with a psychologist, or;<br>Arm B: routine information                                                                          | Crown Crisp Experimental Index         | NR (0-96)                 | Pre-scan: immediate (post-intervention)                                           | Less severe<br>Arm A v Arm B: 39.4 v 42.3                                   | 0.03    |                                         |                                             |             |
|                              |           |                                                                                                                                                                                                                        |                                        |                           |                                                                                   | STAI: State Anxiety subscale                                                | NR (NA) | Pre-scan: immediate (post-intervention) | No difference<br>Arm A v Arm B: 57.7 v 58.6 | 0.77        |
|                              |           |                                                                                                                                                                                                                        |                                        |                           |                                                                                   |                                                                             |         |                                         | Post-scan: immediate                        | Less severe |
| STAI: Trait Anxiety subscale | NR (NA)   | Pre-scan: immediate (post-intervention)                                                                                                                                                                                | NR                                     | NR                        |                                                                                   |                                                                             |         |                                         |                                             |             |
| Vogel[66]                    | 2012      | Arm A: Uptake room with an audio-visual installation involving a video of nature scenes on a 119cm television, dynamic lighting & ambient electronic music<br>Arm B: Uptake room without the audio-visual installation | 8-item STAI                            | 18-32 (≥16)               | Pre-scan: immediately before & immediately after fluorodeoxyglucose uptake period | Less severe<br>Arm A v Arm B: reduction by 2.39 v 1.02                      | 0.04    |                                         |                                             |             |
| Acuff[67]                    | 2014      | Arm A: Receive a hand-held device to contact imaging staff during the scan<br>Arm B: No device                                                                                                                         | STAI: State Anxiety subscale           | 20-80 (NA)                | During scan: immediately before completion of the scan                            | Less severe<br>Arm A v Arm B: 22.87 v 26.45                                 | 0.014   |                                         |                                             |             |
|                              |           |                                                                                                                                                                                                                        |                                        |                           |                                                                                   | Less severe if previous PET/CT<br>Arm A v Arm B: 20.78 v 24.64              | 0.023   |                                         |                                             |             |
|                              |           |                                                                                                                                                                                                                        |                                        |                           |                                                                                   | No difference if first time PET/CT<br>Arm A v Arm B: 23.09 v 27.25, p=0.249 | 0.249   |                                         |                                             |             |

|              |      |                                                                                                                                       |                                               |             |                                                                                    |                                                               |              |
|--------------|------|---------------------------------------------------------------------------------------------------------------------------------------|-----------------------------------------------|-------------|------------------------------------------------------------------------------------|---------------------------------------------------------------|--------------|
| Raz[68]      | 2014 | Arm A: multimedia education session and usual care, or;<br>Arm B: Usual care                                                          | STAI: State Anxiety subscale                  | 20-80 (≥40) | Pre-scan: within 2 weeks<br>Post-scan: immediate, at 1 week & 3-7 months post-scan | No difference at any time point                               | NR           |
|              |      |                                                                                                                                       | STAI: Trait Anxiety subscale                  | 20-80 (≥40) |                                                                                    | No difference at any time point                               | NR           |
|              |      |                                                                                                                                       | PCQ: Lung Cancer adaptation, Anxiety subscale | 0-18 (NR)   |                                                                                    | No difference at any time point                               | 0.11 to 0.76 |
| Zavotsky[69] | 2014 | Arm A: music of their choice played via dock during the scan<br>Arm B: no music                                                       | 11-point Likert scale                         | 0-10 (NA)   | Post-scan: immediate                                                               | No difference<br>Arm A v Arm B: 2.36 v 2.98                   | 0.21         |
| Ashton[70]   | 2019 | All participants: 10-minute shoulder & neck massage and/or hand massage before, during or after imaging, or between two imaging tests | 11-point Likert scale                         | 0-10 (NA)   | Post-intervention (pre- or post-scan)                                              | 81% had a reduction in anxiety following massage <sup>a</sup> | <0.01        |
| Lorca[71]    | 2019 | Arm A: mindfulness meditation<br>Arm B: routine care                                                                                  | STAI: State Anxiety subscale                  | NR (NA)     | Post-scan: immediate                                                               | Less severe<br>Arm A v Arm B: 10.47 v 29.07                   | 0.000        |
|              |      |                                                                                                                                       | STAI: Trait Anxiety subscale                  | NR (NA)     |                                                                                    | No difference                                                 | NS           |
|              |      |                                                                                                                                       | 11-item Likert scale                          | 0-10 (NA)   |                                                                                    | Less severe<br>Arm A v Arm B, 1.07 v 5.70                     | 0.000        |

NR not reported, STAI State-Trait Anxiety Inventory, PCQ Psychological Consequences Questionnaire

<sup>a</sup>Mean scores for overall study population not provided

For peer review only

1  
2  
3  
4  
5  
6  
7  
8  
9  
10  
11  
12  
13  
14  
15  
16  
17  
18  
19  
20  
21  
22  
23  
24  
25  
26  
27  
28  
29  
30  
31  
32  
33  
34  
35  
36  
37  
38  
39  
40  
41  
42  
43  
44  
45  
46  
47

The mean severity scores were below pre-specified anxiety thresholds on 17 of the 19 measures where a threshold was reported[16, 31, 37, 38, 41-43, 45, 47, 54, 57, 58]. The two exceptions were observed in a study comparing people with *TP53* mutations ('carriers') to controls, with all participants undergoing screening scans. In carriers, mean scores were maximally 11.4 (IES Intrusion subscale, threshold 8.5), and 13.3 (IES Avoidance subscale, threshold 8.5). Mean severity scores for controls were below the thresholds[58].

Of the 43 measures without a pre-specified threshold, the majority had mean scores that were less than half the total scores[15, 18, 20, 23-26, 29, 30, 32, 33, 35, 37, 38, 44-46, 49, 52-54, 56, 58, 60, 61]. There were six exceptions, which reported maximal mean severity scores of: 5.5 out of 10 (Likert scale)[17]; 6.4 out of 10 (Likert scale)[50]; 4.1 out of 7 (Likert scale)[40], 33 out of 60 (STAI State Anxiety subscale)[51], 8.1 out of 14 (Health Questionnaire)[58], and; 51.75 out of 80 (STAI)[59]. Four of these scores occurred in studies where scans were performed for reasons other than screening[17, 50, 51, 59], one allowed scans for diagnosis or screening[40], and one allowed scans for screening only[58].

Eight measures used a descriptive range of severity, with more severe levels of scanxiety in 4% to 28% of participants[21, 22, 25, 27, 28, 33, 34, 55].

Four measures could not be interpreted because they failed to report a range and anxiety threshold[31, 36, 47].

### Scanxiety before and after a scan

Of the 20 studies that reported a pre- and post-scan scanxiety measurement, 14 studies reported a statistical comparison[16, 18, 20, 29-32, 35, 38, 50, 51, 57-59] and six did not[23-26, 42, 60](Table 3). There was variation in the timing of scanxiety measurement before a scan from four weeks before the scan until immediately before the scan, and after a scan from immediately after the scan until one year after the scan. Five studies reported a post-scan reduction in scanxiety severity compared to pre-scan levels[16, 29, 30, 32, 50, 59]. Two studies reported an increase in post-scan scanxiety severity[51, 57], and two studies no difference in pre- and post-scan scanxiety severity[18, 31].

Four studies reported mixed findings on the change in scanxiety severity across different measures (Table 5).

**Table 5.** Studies with discrepant results on pre- and post-scan scanxiety severity using different measures

| First author | Measurement tool                                                       |                                                              |
|--------------|------------------------------------------------------------------------|--------------------------------------------------------------|
|              | Post-scan reduction in scanxiety                                       | No difference in pre- or post-scan scanxiety                 |
| Sutton[20]   | General Health Questionnaire: Anxiety subscale<br>3-point Likert scale | STAI: State Anxiety subscale<br>STAI: Trait Anxiety subscale |
| Vierikko[35] | Health Anxiety Inventory                                               | Worry about lung cancer                                      |
| Hutton[38]   | 6-item STAI                                                            | HADS: Anxiety subscale                                       |
| Bancroft[58] | HADS: Anxiety subscale                                                 | Cancer Worry Scale – Revised<br>Health Questionnaire         |

STAI: State Trait Anxiety Inventory, HADS: Hospital Anxiety and Depression Scale

Although Bancroft *et al.*[58] reported a reduction in scanxiety severity using HADS (anxiety subscale), there was no difference in scanxiety prevalence.

## Contributing factors to scanxiety

Multiple comparisons were made between scanxiety and possible contributing factors across the included studies (Table 6).

**Table 6.** Contributing factors to scanxiety

| Variable               | Comparison                                                | Effect on scanxiety         | Studies | n      | P-value                                                                               |
|------------------------|-----------------------------------------------------------|-----------------------------|---------|--------|---------------------------------------------------------------------------------------|
| Age                    | Younger v older                                           | More prevalent              | 1       | 398    | 0.008[41]                                                                             |
|                        |                                                           | No difference in prevalence | 2       | 338    | NS[28, 50]                                                                            |
|                        |                                                           | More severe                 | 5       | 1883   | 0.005[45], <0.01[20], <0.01 (for screening)[70], 0.01[24], NR[63]                     |
|                        |                                                           | No difference in severity   | 11      | 6804   | NS[22, 27, 36, 37, 42, 43, 49, 51, 59, 62], NS (for surveillance)[70]                 |
| Gender                 | Men v women                                               | More prevalent              | 1       | 200    | <0.001[39]                                                                            |
|                        |                                                           | Less prevalent              | 1       | 298    | 0.021[41]                                                                             |
|                        |                                                           | No difference in prevalence | 1       | 106    | NS[28]                                                                                |
|                        |                                                           | More severe                 | 1       | 232    | 0.033 (post-scan)[50]                                                                 |
|                        |                                                           | Less severe                 | 2       | 1381   | 0.000[47], <0.05[57]                                                                  |
|                        |                                                           | No difference in severity   | 5       | 580    | NS[37, 49, 51, 59], NS (pre-scan)[50]                                                 |
| Ethnicity              | White v other races                                       | More severe                 | 1       | 143    | NR[63]                                                                                |
|                        | Maori & Pacific Islanders v New Zealand European or Asian | More severe                 | 1       | 584    | <0.001[27]                                                                            |
|                        | Any                                                       | No difference in severity   | 5       | 1454   | NS[22, 24, 37, 40, 49]                                                                |
| Education              | Lower v higher                                            | More prevalent              | 1       | 398    | <0.001[41]                                                                            |
|                        |                                                           | No difference in prevalence | 2       | 338    | NS[28, 50]                                                                            |
|                        |                                                           | More severe                 | 8       | 7400   | 0.003[62], 0.007[36], <0.01[22], ≤0.01[42], 0.012[24], 0.018[27], 0.04[43], <0.05[23] |
|                        |                                                           | No difference in severity   | 6       | 591    | NS[37, 49, 51, 59, 63, 69]                                                            |
| Employment             | Unemployed v employed                                     | More prevalent              | 1       | 398    | 0.046[41]                                                                             |
|                        |                                                           | More severe                 | 3       | 5056   | 0.01[43], 0.05[23], ≤0.05[42]                                                         |
|                        |                                                           | No difference in severity   | 2       | 654    | NS[27, 37]                                                                            |
| Income                 | Higher v lower                                            | No difference in severity   | 3       | 757    | NS[27, 37, 49]                                                                        |
| Marital status         | Married or de facto v single                              | More severe                 | 1       | 637    | ≤0.01 (using IES - Intrusion subscale)[42]                                            |
|                        |                                                           | No difference in severity   | 5       | 1790   | NS[24, 36, 37, 49], NS (using STAI - State anxiety subscale)[42]                      |
| Children               | Children v no children                                    | No difference in severity   | 3       | 5206   | NS[24, 37, 43]                                                                        |
| Smoking status         | Current v non-smoking <sup>a</sup>                        | More severe                 | 3       | 4562   | <0.001[43, 54], 0.031[47]                                                             |
|                        |                                                           | No difference in severity   | 2       | 330    | NS[40, 49]                                                                            |
| Reason for scan        | Diagnostic v screening                                    | More severe                 | 3       | 1104   | 0.007[41], 0.047[36], NR[62]                                                          |
|                        | Staging or surveillance v monitoring                      | More severe                 | 1       | 200    | <0.001[39]                                                                            |
|                        | Lower v higher referral clarity                           | More severe                 | 1       | 169    | 0.048[54]                                                                             |
| Type of scan           | MRI v mammogram                                           | More severe                 | 1       | 49     | 0.009[48]                                                                             |
|                        |                                                           | Less severe                 | 1       | 637    | NR[42]                                                                                |
|                        | CT v MRI                                                  | More severe                 | 1       | 36     | 0.007[44]                                                                             |
|                        |                                                           | Less severe                 | 1       | 115    | NR[52]                                                                                |
|                        | PET v CT                                                  | More severe                 | 1       | 82     | 0.01[33]                                                                              |
|                        | Nuclear medicine scan v non-nuclear medicine scan         | More severe                 | 1       | 398    | 0.004[41]                                                                             |
|                        | MRI v PET/CT                                              | No difference in severity   | 2       | 142    | NS[52, 53]                                                                            |
| CT v PET v chest X-ray | No difference in severity                                 | 1                           | 59      | NS[34] |                                                                                       |



|                          |                                              |                             |   |      |                                                                                                                                                                       |
|--------------------------|----------------------------------------------|-----------------------------|---|------|-----------------------------------------------------------------------------------------------------------------------------------------------------------------------|
|                          | Bone scan v PET scan                         | More severe                 | 1 | 94   | <0.001 (post-scan)[59]                                                                                                                                                |
|                          |                                              | No difference in severity   | 1 | 94   | NS (pre-scan)[59]                                                                                                                                                     |
| Scan-naïve               | First v subsequent scans                     | More prevalent              | 1 | 398  | 0.001[41]                                                                                                                                                             |
|                          |                                              | No difference in prevalence | 1 | 200  | NS[39]                                                                                                                                                                |
|                          |                                              | More severe                 | 5 | 3796 | <0.0005[38], <0.01[25], <0.02[19], <0.05[67], NR[66]                                                                                                                  |
|                          |                                              | Less severe                 | 1 | 93   | 0.038[36]                                                                                                                                                             |
|                          |                                              | No difference in severity   | 6 | 2491 | NS[24, 27, 50, 51, 59, 62]                                                                                                                                            |
| Pain                     | Pain v no pain during scan                   | More severe                 | 6 | 4291 | <0.0001[25], <0.001[27], 0.001[62], <0.01[23, 69] <0.05[22]                                                                                                           |
| Risk of cancer           | Past history v no past history of cancer     | More severe                 | 2 | 864  | ≤0.001[42], <0.05[40]                                                                                                                                                 |
|                          |                                              | Less severe                 | 1 | 434  | 0.013[45]                                                                                                                                                             |
|                          |                                              | No difference in severity   | 3 | 1206 | NS[15, 24, 58]                                                                                                                                                        |
|                          | Family history v no family history of cancer | More severe                 | 1 | 584  | 0.002[27]                                                                                                                                                             |
|                          |                                              | No difference in severity   | 3 | 1255 | NS[15, 24, 36]                                                                                                                                                        |
|                          | Mutation carrier v not a carrier             | More severe                 | 1 | 88   | <0.05 (three comparisons, using IES cancer – Intrusion and Avoidance subscales, and post-scan Health Questionnaire)[58]                                               |
|                          |                                              | No difference               | 1 | 88   | NS (five comparisons, using HADS- Anxiety subscale, Cancer Worry Scale – Revised, IES MRI – Intrusion and Avoidance subscales, and pre-scan Health Questionnaire)[58] |
|                          | Higher, not otherwise specified v lower      | More severe                 | 1 | 70   | <0.05[37]                                                                                                                                                             |
| Perceived risk of cancer | Higher v lower                               | More severe                 | 3 | 1545 | <0.001[27], ≤0.001[42], <0.01[30]                                                                                                                                     |

NS not significant, NR not reported, IES Impact of Event Scale, STAI State Trait Anxiety Inventory, HADS Hospital Anxiety and Depression Scale, MRI Magnetic Resonance Imaging

\*One study compared current smokers v former smokers[54], and one study compared current and former smokers v never smokers[49]

In summary, higher scanxiety severity was associated with people with:

- Lower education (compared to higher education, eight of 14 studies[22-24, 27, 36, 37, 42, 43, 49, 51, 59, 62, 63, 69]);
- A history of smoking (compared to non-smoking, three of five studies[40, 43, 47, 49, 54]);
- Higher pain levels during the scan (compared to no pain, all six studies[22, 23, 25, 27, 62, 69]);
- Higher perceived risk of cancer (compared to lower perceived risk of cancer, all three studies[27, 30, 42]), and;
- Diagnostic scans (compared to screening scans, all three studies[36, 41, 62])

The prevalence or severity of scanxiety was not consistently affected by age (13 of 19 comparisons[20, 22, 24, 27, 28, 36, 37, 41-43, 45, 49-51, 59, 62, 63, 70]), gender (six of 11 comparisons[28, 37, 39, 41, 47, 49-51, 57, 59]), ethnicity (five of seven comparisons[22, 24, 27, 37, 40, 49, 63]), income (all three comparisons[27, 37, 49]), marital status (five of six comparisons[24, 36, 37, 42, 49]) or having children (all three comparisons[24, 37, 43]).

Inconclusive results occurred in the following comparisons:

- Employment (unemployed compared to employed, four of six comparisons[23, 27, 37, 41-43])
- Scan-naivety (first scan compared to subsequent scans, six of 13 comparisons[19, 24, 25, 27, 36, 38, 39, 41, 50, 51, 62, 66, 67])

- Risk of cancer (higher compared to lower risk of cancer, seven of 19 comparisons[15, 24, 27, 36, 37, 40, 42, 45, 58])

Although nine studies reported differences in scanxiety between different imaging modalities, the number of comparisons between specific scans were insufficient to draw conclusions[33, 34, 41, 42, 44, 48, 52, 53, 59].

### Interventions that reduce scanxiety

Five of the 10 intervention studies showed a reduction in scanxiety compared to controls[64-67, 71]. Four studies reported no difference in scanxiety between the intervention arms[62, 63, 68, 69]. The study where all participants received the same intervention showed a reduction in anxiety[70]. Details of these results are listed in **Table 4**.

Both multi-faceted interventions studies incorporating education and emotional or psychological support showed a reduction in scanxiety[64, 65].

Of the six studies with relaxation, distraction and/or meditation components, three studies showed a reduction in scanxiety[66, 70, 71], while three studies did not[62, 63, 69].

Interventions with only educational components did not show a reduction in scanxiety[62, 68].

A reduction in scanxiety severity was also observed when a hand-held device was available to communicate with radiology staff. This reduction was observed in the subgroup of participants who had had a previous scan, but not in participants having their first scan[67].

## DISCUSSION

This is the first systematic scoping review aimed at quantifying the phenomenon of scanxiety in people having cancer-related scans. Scanxiety is a common and important clinical problem, as supported by the large number of studies identified by our search. There is a wide range of reported scanxiety prevalence (0 to 83%), and scanxiety is generally not severe. Severity of scanxiety may be lower after a scan and is higher in people who have a lower education, currently smoke, experience pain during a scan, have higher perceived risk of cancer, and who are having diagnostic (rather than screening) scans. Interventions are more likely to reduce scanxiety if they involve active participation (eg psychological and emotional support, meditation or a hand-held communication device) rather than passive participation (listening to music or education only).

Firm conclusions about prevalence and severity could not be drawn due to considerable methodological heterogeneity of the included studies, especially in relation to scanxiety measurement tools. None were designed and validated for scanxiety, and some tools and their thresholds were not designed and/or validated for anxiety. This review did use purpose-designed definitions of prevalence and severity to allow some comparison between studies; however, the lack of a universal definition or specific measurement tool for scanxiety limits confidence in the interpretation of the results and interstudy comparisons. This highlights the need for a universally accepted measure to quantify scanxiety and evaluate scanxiety interventions in the future. A recent literature review by Al-Dibouni[75] provided a

narrative overview of scanxiety in people having scans for any reason, and also recognised the lack of a specific measurement tool for scanxiety and variable scanxiety prevalence among studies[75].

Given the STAI and Likert scales were the most common tools used, we propose that future studies use the state anxiety subscale of the STAI, with a range of 20-80 and no specific anxiety threshold[72] (or variants, such as the STAI-6[76]), and/or the distress thermometer, with a range of 0-10 and a clinically significant threshold of  $\geq 4$ [77], to measure scanxiety. These tools can be combined with other validated anxiety measures, such as the HADS, to further refine the relationship between tools. Using existing measures rather than developing a scanxiety specific tool allows scanxiety assessment to occur immediately and broadly in clinical research.

Strengths of this scoping review include the rigorous methodology using a published framework[12, 13], two independent researchers for study selection and data extraction, and the implementation of a comprehensive search strategy and broad inclusion criteria to achieve an exhaustive review of the available literature. Limitations include the use of purpose-designed definitions of prevalence and severity and the limited generalisability of the results due to heterogeneity in cancer type, reason for scan and imaging modality between the studies, and because the search strategy was restricted to English language databases. Finally, scanxiety in people who were recalled after an abnormal screening result were excluded from this review due to confounding and feasibility. These populations may be at higher risk of scanxiety, and further research may provide further insight about the scanxiety experience in this population.

Additional research implications of our review include the need for research into high-risk populations for scanxiety, including people with advanced cancer. This population was included in only three studies [49, 55, 60]; however, people with cancer have higher rates of anxiety compared to the general population[78]. As they may be more likely to develop scanxiety, experience more severe scanxiety, or have higher post-scan scanxiety while waiting for scan results, longitudinal assessment of scanxiety is required. Further research into effective and feasible interventions is also required, though these will face implementation challenges due to variations in health systems and available resources.

## CONCLUSIONS

Prevalence and severity of scanxiety varied widely, although heterogeneity in scanxiety measurement interpretation. A uniform approach to evaluating scanxiety will improve understanding of the phenomenon and help guide the development of interventions to high-risk populations.

## FOOTNOTES

**Contributions:** KTB, PB, BK, HD and CB contributed to the concept and design of this review. KTB developed and implemented the search strategy. KTB and RL independently screened and reviewed titles, abstracts and full-text articles for inclusion. KTB and RL independently extracted data from the included studies. PB, BK, HD and CB contributed content expertise to ensure clinically relevant interpretation of the data. KTB drafted the initial manuscript, and RL, PB, BK, HD and CB reviewed and approved the manuscript prior to submission.

**Competing interests:** None declared

**Funding:** This research received no specific grant from any funding agency in the public, commercial or not-for-profit sectors

**Data availability:** All data relevant to the study are included in the article or uploaded as supplementary information. Data are available upon reasonable request. The additional data are the data extraction forms for each study.

## REFERENCES

1. Feiler B. Scanxiety. Fear of a postcancer ritual. *Time* 2011;177(24):56
2. Brandzel S, Erosenberg D, Johnson D, et al. Women's experiences and preferences regarding breast imaging after completing breast cancer treatment. *Patient Prefer Adherence* 2017;11:199-204.doi:10.2147/PPA.S122244
3. Evans R, Taylor S, Janes S, et al. Patient experience and perceived acceptability of whole-body magnetic resonance imaging for staging colorectal and lung cancer compared with current staging scans: a qualitative study. *BMJ Open* 2017;7(9):e016391.doi:10.1136/bmjopen-2017-016391
4. Mathers SA, McKenzie GA, Robertson EM. A necessary evil: The experiences of men with prostate cancer undergoing imaging procedures. *Radiography* 2011;17(4):284-91.doi:10.1016/j.radi.2011.06.005
5. Strand T, Tornqvist E, Rask M, et al. The experience of patients with neoplasm metastasis in the spine during a magnetic resonance imaging examination. *J Radiol Nurs* 2014;33(4):191-8.doi:10.1016/j.jradnu.2014.09.001
6. Truesdale-Kennedy M, Taggart L, McIlpatrick S. Breast cancer knowledge among women with intellectual disabilities and their experiences of receiving breast mammography. *J Adv Nurs* 2011;67(6):1294-304.doi:10.1111/j.1365-2648.2010.05595.x
7. Memorial Sloan Kettering. Coping with "Scanxiety" during and after Cancer Treatment 2013. <https://www.mskcc.org/blog/coping-scanxiety-during-and-after-treatment/> (accessed May 2020).
8. Dana-Farber Cancer Institute. Scan Anxiety (or 'Scanxiety'): 5 Approaches to Coping 2019. <https://blog.dana-farber.org/insight/2019/02/5-tips-for-reducing-scanxiety/> (accessed May 2020).
9. Barter K. Scans + Anxiety = Scanxiety 2019. <https://pinkhope.org.au/scans-anxiety-scanxiety/> (accessed May 2020).
10. brainstrust. Scanxiety. <https://brainstrust.org.uk/brain-tumour-support/quality-of-life/living-well-with-a-brain-tumour/scanxiety/> (accessed May 2020).
11. Fight Colorectal Cancer. Waiting for Test Results: 5 Tips to Minimize Scanxiety 2019. <https://fightcolorectalcancer.org/blog/scanxiety/> (accessed May 2020).
12. Arksey H, O'Malley L. Scoping studies: towards a methodological framework. *Int J Soc Res Methodol* 2005;8(1):19-32.doi:10.1080/1364557032000119616
13. Levac D, Colquhoun H, O'Brien KK. Scoping studies: advancing the methodology. *Implement Sci* 2010;5:69.doi:10.1186/1748-5908-5-69
14. Tricco AC, Lillie E, Zarin W, et al. PRISMA Extension for Scoping Reviews (PRISMA-ScR): Checklist and Explanation. *Ann Intern Med* 2018;169(7):467-73.doi:10.7326/M18-0850
15. Andolf E, Jorgensen C, Uddenberg N, et al. Psychological effects of ultrasound screening for ovarian carcinoma. *J Psychosom Obstet Gynaecol* 1990;11(2):155-62.doi:10.3109/01674829009084412
16. Bull AR, Campbell MJ. Assessment of the psychological impact of a breast screening programme. *Br J Radiol* 1991;64(762):510-5.doi:10.1259/0007-1285-64-762-510

17. Peteet JR, Stomper PC, Ross DM, et al. Emotional support for patients with cancer who are undergoing CT: semistructured interviews of patients at a cancer institute. *Radiology* 1992;182(1):99-102.doi:10.1148/radiology.182.1.1727318
18. Cockburn J, Staples M, Hurley SF, et al. Psychological consequences of screening mammography. *J Med Screen* 1994;1(1):7-12.doi:10.1177/096914139400100104
19. Ellman R, Thomas BA. Is psychological wellbeing impaired in long-term survivors of breast cancer? *J Med Screen* 1995;2(1):5-9.doi:10.1177/096914139500200103
20. Sutton S, Saidi G, Bickler G, et al. Does routine screening for breast cancer raise anxiety? Results from a three wave prospective study in England. *J Epidemiol Community Health* 1995;49(4):413-8.doi:10.1136/jech.49.4.413
21. Bakker DA, Lightfoot NE, Steggle S, et al. The experience and satisfaction of women attending breast cancer screening. *Oncol Nurs Forum* 1998;25(1):115-21
22. Gupta R, Nayak MB, Khoursheed M, et al. Emotional distress in women presenting for breast imaging. *Ann Saudi Med* 1999;19(6):511-4.doi:10.5144/0256-4947.1999.511
23. Hafslund B. Mammography and the experience of pain and anxiety. *Radiography* 2000;6(4):269-72.doi:10.1053/radi.2000.0281
24. Meystre-Agustoni G, Paccaud F, Jeannin A, et al. Anxiety in a cohort of Swiss women participating in a mammographic screening programme. *J Med Screen* 2001;8(4):213-9.doi:10.1136/jms.8.4.213
25. Drossaert CH, Boer H, Seydel ER. Monitoring women's experiences during three rounds of breast cancer screening: results from a longitudinal study. *J Med Screen* 2002;9(4):168-75.doi:10.1136/jms.9.4.168
26. Sandin B, Chorot P, Valiente RM, et al. Adverse psychological effects in women attending a second-stage breast cancer screening. *J Psychosom Res* 2002;52(5):303-9.doi:10.1016/s0022-3999(01)00227-6
27. Brunton M, Jordan C, Campbell I. Anxiety before, during, and after participation in a population-based screening mammography programme in Waikato Province, New Zealand. *N Z Med J* 2005;118(1209):U1299
28. Geurts TW, Ackerstaff AH, Van Zandwijk N, et al. The psychological impact of annual chest X-ray follow-up in head and neck cancer. *Acta Otolaryngol* 2006;126(12):1315-20.doi:10.1080/00016480600868414
29. Tyndel S, Austoker J, Henderson BJ, et al. What is the psychological impact of mammographic screening on younger women with a family history of breast cancer? Findings from a prospective cohort study by the PIMMS Management Group. *J Clin Oncol* 2007;25(25):3823-30.doi:10.1200/JCO.2007.11.0437
30. Bunge EM, van den Bergh KA, Essink-Bot ML, et al. High affective risk perception is associated with more lung cancer-specific distress in CT screening for lung cancer. *Lung Cancer* 2008;62(3):385-90.doi:10.1016/j.lungcan.2008.03.029
31. Brown Sofair J, Lehlbach M. The role of anxiety in a mammography screening program. *Psychosomatics* 2008;49(1):49-55.doi:10.1176/appi.psy.49.1.49
32. van den Bergh KA, Essink-Bot ML, Bunge EM, et al. Impact of computed tomography screening for lung cancer on participants in a randomized controlled trial (NELSON trial). *Cancer* 2008;113(2):396-404.doi:dx.doi.org/10.1002/cncr.23590
33. Westerterp M, van Westreenen HL, Deutekom M, et al. Patients' perception of diagnostic tests in the preoperative assessment of esophageal cancer. *Patient Prefer Adherence* 2008;2:157-62
34. Bastiaannet E, Hoekstra-Weebers JE, Francken AB, et al. Perception of burden experienced during diagnostic tests by melanoma patients with lymph node metastases. *Melanoma Res* 2009;19(1):36-41.doi:10.1097/CMR.0b013e32831993b7

- 1  
2  
3 35. Vierikko T, Kivisto S, Jarvenpaa R, et al. Psychological impact of computed tomography screening  
4 for lung cancer and occupational pulmonary disease among asbestos-exposed workers. *Eur J Cancer*  
5 *Prev* 2009;18(3):203-6.doi:10.1097/cej.0b013e328329d800
- 6 36. Bolukbas N, Erbil N, Kahraman AN. Determination of the anxiety level of women who present for  
7 mammography. *Asian Pac J Cancer Prev* 2010;11(2):495-8
- 8 37. Thompson CA, Charlson ME, Schenkein E, et al. Surveillance CT scans are a source of anxiety and  
9 fear of recurrence in long-term lymphoma survivors. *Ann Oncol* 2010;21(11):2262-  
10 6.doi:10.1093/annonc/mdq215
- 11 38. Hutton J, Walker LG, Gilbert FJ, et al. Psychological impact and acceptability of magnetic  
12 resonance imaging and X-ray mammography: the MARIBS Study. *Br J Cancer* 2011;104(4):578-  
13 86.doi:10.1038/bjc.2011.1
- 14 39. Pifarre P, Simo M, Gispert JD, et al. [Diagnostic imaging studies: do they create anxiety?]. *Rev*  
15 *Esp Med Nucl* 2011;30(6):346-50.doi:dx.doi.org/10.1016/j.remn.2011.03.003
- 16 40. Steinemann SK, Chun MB, Huynh DH, et al. Breast cancer worry among women awaiting  
17 mammography: is it unfounded? Does prior counseling help? *Hawaii Med J* 2011;70(7):149-50
- 18 41. Yu LS, Chojniak R, Borba MA, et al. Prevalence of anxiety in patients awaiting diagnostic  
19 procedures in an oncology center in Brazil. *Psychooncology* 2011;20(11):1242-5.doi:10.1002/pon.1842
- 20 42. Bredart A, Kop JL, Fall M, et al. Anxiety and specific distress in women at intermediate and high  
21 risk of breast cancer before and after surveillance by magnetic resonance imaging and mammography  
22 versus standard mammography. *Psychooncology* 2012;21(11):1185-94.doi:10.1002/pon.2025
- 23 43. Hafslund B, Espehaug B, Nortvedt MW. Health-related quality of life, anxiety and depression  
24 related to mammography screening in Norway. *J Clin Nurs* 2012;21(21-22):3223-34.doi:10.1111/j.1365-  
25 2702.2012.04244.x
- 26 44. Adams HJ, Kwee TC, Vermoolen MA, et al. Whole-body MRI vs. CT for staging lymphoma: patient  
27 experience. *Eur J Radiol* 2014;83(1):163-6.doi:10.1016/j.ejrad.2013.10.008
- 28 45. Baena-Canada JM, Rosado-Varela P, Exposito-Alvarez I, et al. Women's perceptions of breast  
29 cancer screening. Spanish screening programme survey. *Breast* 2014;23(6):883-  
30 8.doi:10.1016/j.breast.2014.09.010
- 31 46. Andersson C, Johansson B, Wassberg C, et al. Patient experience of an 18F-FDG-PET/CT  
32 examination: Need for improvements in patient care. *J Radiol Nurs* 2015;34(2):100-  
33 8.doi:10.1016/j.jradnu.2014.11.008
- 34 47. Elboga U, Elboga G, Can C, et al. Assessment of procedure related anxiety and depression in  
35 oncologic patients before F-18 FDG PET-CT imaging. *J Psychiatry* 2015;18 (1) (no  
36 pagination)(215).doi:10.4172/Psychiatry.1000215
- 37 48. Hobbs MM, Taylor DB, Buzynski S, et al. Contrast-enhanced spectral mammography (CESM) and  
38 contrast enhanced MRI (CEMRI): Patient preferences and tolerance. *J Med Imaging Radiat Oncol*  
39 2015;59(3):300-5.doi:10.1111/1754-9485.12296
- 40 49. Bauml JM, Troxel A, Epperson CN, et al. Scan-associated distress in lung cancer: Quantifying the  
41 impact of "scanxiety". *Lung Cancer* 2016;100:110-3.doi:10.1016/j.lungcan.2016.08.002
- 42 50. Abreu C, Grilo A, Lucena F, et al. Oncological Patient Anxiety in Imaging Studies: the PET/CT  
43 Example. *J Cancer Educ* 2017;32(4):820-6.doi:10.1007/s13187-016-1069-3
- 44 51. Grilo A, Vieira L, Carolino E, et al. Anxiety in Cancer Patients during (18)F-FDG PET/CT Low Dose:  
45 A Comparison of Anxiety Levels before and after Imaging Studies. *Nurs Res Pract*  
46 2017;2017:3057495.doi:10.1155/2017/3057495
- 47 52. Evans RE, Taylor SA, Beare S, et al. Perceived patient burden and acceptability of whole body  
48 MRI for staging lung and colorectal cancer; comparison with standard staging investigations. *Br J Radiol*  
49 2018;91(1086):20170731.doi:10.1259/bjr.20170731
- 50  
51  
52  
53  
54  
55  
56  
57  
58

- 1  
2  
3 53. Goense L, Borggreve AS, Heethuis SE, et al. Patient perspectives on repeated MRI and PET/CT  
4 examinations during neoadjuvant treatment of esophageal cancer. *Br J Radiol*  
5 2018;91(1086):20170710.doi:10.1259/bjr.20170710  
6  
7 54. Hall DL, Lennes IT, Carr A, et al. Lung Cancer Screening Uncertainty among Patients Undergoing  
8 LDCT. *Am J Health Behav* 2018;42(1):69-76.doi:10.5993/AJHB.42.1.7  
9  
10 55. Derry HM, Maciejewski PK, Epstein AS, et al. Associations between Anxiety, Poor Prognosis, and  
11 Accurate Understanding of Scan Results among Advanced Cancer Patients. *J Palliat Med* 2019;22(8):961-  
12 5.doi:10.1089/jpm.2018.0624  
13  
14 56. Soriano EC, Perndorfer C, Siegel SD, et al. Threat sensitivity and fear of cancer recurrence: a daily  
15 diary study of reactivity and recovery as patients and spouses face the first mammogram post-diagnosis.  
16 *J Psychosoc Oncol* 2019;37(2):131-44.doi:10.1080/07347332.2018.1535532  
17  
18 57. Taghizadeh N, Tremblay A, Cressman S, et al. Health-related quality of life and anxiety in the  
19 PAN-CAN lung cancer screening cohort. *BMJ Open* 2019;9(1):e024719.doi:10.1136/bmjopen-2018-  
20 024719  
21  
22 58. Bancroft EK, Saya S, Brown E, et al. Psychosocial effects of whole-body MRI screening in adult  
23 high-risk pathogenic TP53 mutation carriers: a case-controlled study (SIGNIFY). *J Med Genet*  
24 2020;57(4):226-36.doi:10.1136/jmedgenet-2019-106407  
25  
26 59. Grilo AM, Vieira L, Carolino E, et al. Cancer Patient Experience in a Nuclear Medicine  
27 Department: Comparison between Bone Scintigraphy and (18)F-FDG PET/CT. *J Nucl Med Technol*  
28 2020.doi:10.2967/jnmt.119.239285  
29  
30 60. Morreale MK, Moore TF, Kim S, et al. Preferences for notification of imaging results in patients  
31 with metastatic cancer. *Patient Educ Couns* 2020;103(2):392-7.doi:10.1016/j.pec.2019.08.032  
32  
33 61. Paiella S, Marinelli V, Secchettin E, et al. The emotional impact of surveillance programs for  
34 pancreatic cancer on high-risk individuals: A prospective analysis. *Psychooncology* 2020;29(6):1004-  
35 11.doi:10.1002/pon.5370  
36  
37 62. Mainiero MB, Schepps B, Clements NC, et al. Mammography-related anxiety: effect of  
38 preprocedural patient education. *Womens Health Issues* 2001;11(2):110-5.doi:10.1016/s1049-  
39 3867(00)00071-2  
40  
41 63. Domar AD, Eyvazzadeh A, Allen S, et al. Relaxation techniques for reducing pain and anxiety  
42 during screening mammography. *AJR Am J Roentgenol* 2005;184(2):445-  
43 7.doi:10.2214/ajr.184.2.01840445  
44  
45 64. Fernandez-Feito A, Lana A, Baldonado-Cernuda R, et al. A brief nursing intervention reduces  
46 anxiety before breast cancer screening mammography. *Psicothema* 2015;27(2):128-  
47 33.doi:10.7334/psicothema2014.203  
48  
49 65. Caruso A, Bongiorno L, Vallini L, et al. Breast cancer and distress resulting from Magnetic  
50 Resonance Imaging (MRI): the impact of a psychological intervention of emotional and informative  
51 support. *J Exp Clin Cancer Res* 2006;25(4):499-505  
52  
53 66. Vogel WV, Valdes Olmos RA, Tijs TJ, et al. Intervention to lower anxiety of 18F-FDG PET/CT  
54 patients by use of audiovisual imagery during the uptake phase before imaging. *J Nucl Med Technol*  
55 2012;40(2):92-8.doi:10.2967/jnmt.111.097964  
56  
57 67. Acuff SN, Bradley YC, Barlow P, et al. Reduction of patient anxiety in PET/CT imaging by  
58 improving communication between patient and technologist. *J Nucl Med Technol* 2014;42(3):211-  
59 7.doi:10.2967/jnmt.114.139915  
60  
61 68. Raz DJ, Nelson RA, Kim JY, et al. Pilot study of a video intervention to reduce anxiety and  
62 promote preparedness for lung cancer screening. *Cancer Treat Res Commun* 2018;16:1-  
63 8.doi:10.1016/j.ctarc.2018.04.004  
64  
65 69. Zavotsky KE, Banavage A, James P, et al. The effects of music on pain and anxiety during  
66 screening mammography. *Clin J Oncol Nurs* 2014;18(3):E45-9.doi:10.1188/14.CJON.E45-E49  
67  
68  
69  
70

- 1  
2  
3 70. Ashton JC, Bousquet D, Fevrier E, et al. Massage therapy in the breast imaging department:  
4 repurposing an ancient anxiety reducing method. *Clin Imaging* 2020;67:49-  
5 54.doi:10.1016/j.clinimag.2020.05.029  
6  
7 71. Lorca AM, Lorca MM, Criado JJ, et al. Using mindfulness to reduce anxiety during pet/ct studies.  
8 *Mindfulness* 2019;10:1163-8.doi:10.1007/s12671-018-1065-2  
9  
10 72. Spielberger CD, Gorsuch RL, Lushene R, et al. Manual for the State-Trait Anxiety Inventory. Palo  
11 Alto, CA: Consulting Psychologists Press 1983.  
12  
13 73. Zigmond AS, Snaith RP. The Hospital Anxiety and Depression Scale. *Acta Psychiatr Scand*  
14 1983;67(6):361-70.doi:10.1111/j.1600-0447.1983.tb09716.x  
15  
16 74. Rush Jr AJ, First MB, Blacker D. Handbook of Psychiatric Measures: Symptom Checklist-90-  
17 Revised (SCL-90-R); Brief Symptom Inventory (BSI). 2nd ed. Arlington, VA: American Psychiatric  
18 Publishing, Inc. 2008.  
19  
20 75. Al-Dibouni Z. Scanxiety. Improving the patient's experience. Part 1. *Imaging & Therapy Practice*  
21 2019:21-5  
22  
23 76. Marteau T, Bekker H. The development of a six-item short-form of the state scale of the  
24 Spielberger State-Trait Anxiety Inventory (STAI). *Br J Clin Psychol* 1992;31(3):301-6.doi:10.1111/j.2044-  
25 8260.1992.tb00997.x  
26  
27 77. Ownby K. Use of the Distress Thermometer in Clinical Practice. *J Adv Pract Oncol*  
28 2019;10(2).doi:10.6004/jadpro.2019.10.2.7  
29  
30 78. Pitman A, Suleman S, Hyde N, et al. Depression and anxiety in patients with cancer. *BMJ*  
31 2018;361:k1415.doi:10.1136/bmj.k1415  
32  
33  
34  
35  
36  
37  
38  
39  
40  
41  
42  
43  
44  
45  
46  
47  
48  
49  
50  
51  
52  
53  
54  
55  
56  
57  
58

## FIGURE CAPTIONS

31 **Figure 1.** Search strategy used for Ovid MEDLINE (1946 onwards)  
32

33 **Figure 2.** Study search and selection flow diagram  
34  
35  
36  
37  
38  
39  
40  
41  
42  
43  
44  
45  
46  
47  
48  
49  
50  
51  
52  
53  
54  
55  
56  
57  
58



**Figure 1.** Search strategy used for Ovid MEDLINE (1946 onwards)

| # | Search                | #  | Search                  | #  | Search                 | #  | Search           |
|---|-----------------------|----|-------------------------|----|------------------------|----|------------------|
| 1 | Exp Neoplasms/        | 10 | Exp Diagnostic Imaging/ | 15 | exp Anxiety/           | 22 | or/1-9           |
| 2 | Exp Medical oncology/ | 11 | imaging.ti,ab           | 16 | exp Anxiety Disorders/ | 23 | or/10-14         |
| 3 | neoplasm*.ti,ab       | 12 | scan.ti,ab              | 17 | exp Fear/              | 24 | or/15-21         |
| 4 | cancer*.ti,ab         | 13 | tomography.ti,ab        | 18 | anxi*.ti,ab            | 25 | 22 and 23 and 24 |
| 5 | neoplasm*.ti,ab       | 14 | ultraso*.ti,ab          | 19 | fear.ti,ab             |    |                  |
| 6 | malignan*.ti,ab       |    |                         | 20 | worr*.ti,ab            |    |                  |
| 7 | tum??r*.ti,ab         |    |                         | 21 | distress*.ti,ab        |    |                  |
| 8 | oncolog*.ti,ab        |    |                         |    |                        |    |                  |
| 9 | carcinoma*.ti,ab      |    |                         |    |                        |    |                  |

For peer review only

**Figure 2.** Study search and selection flow diagram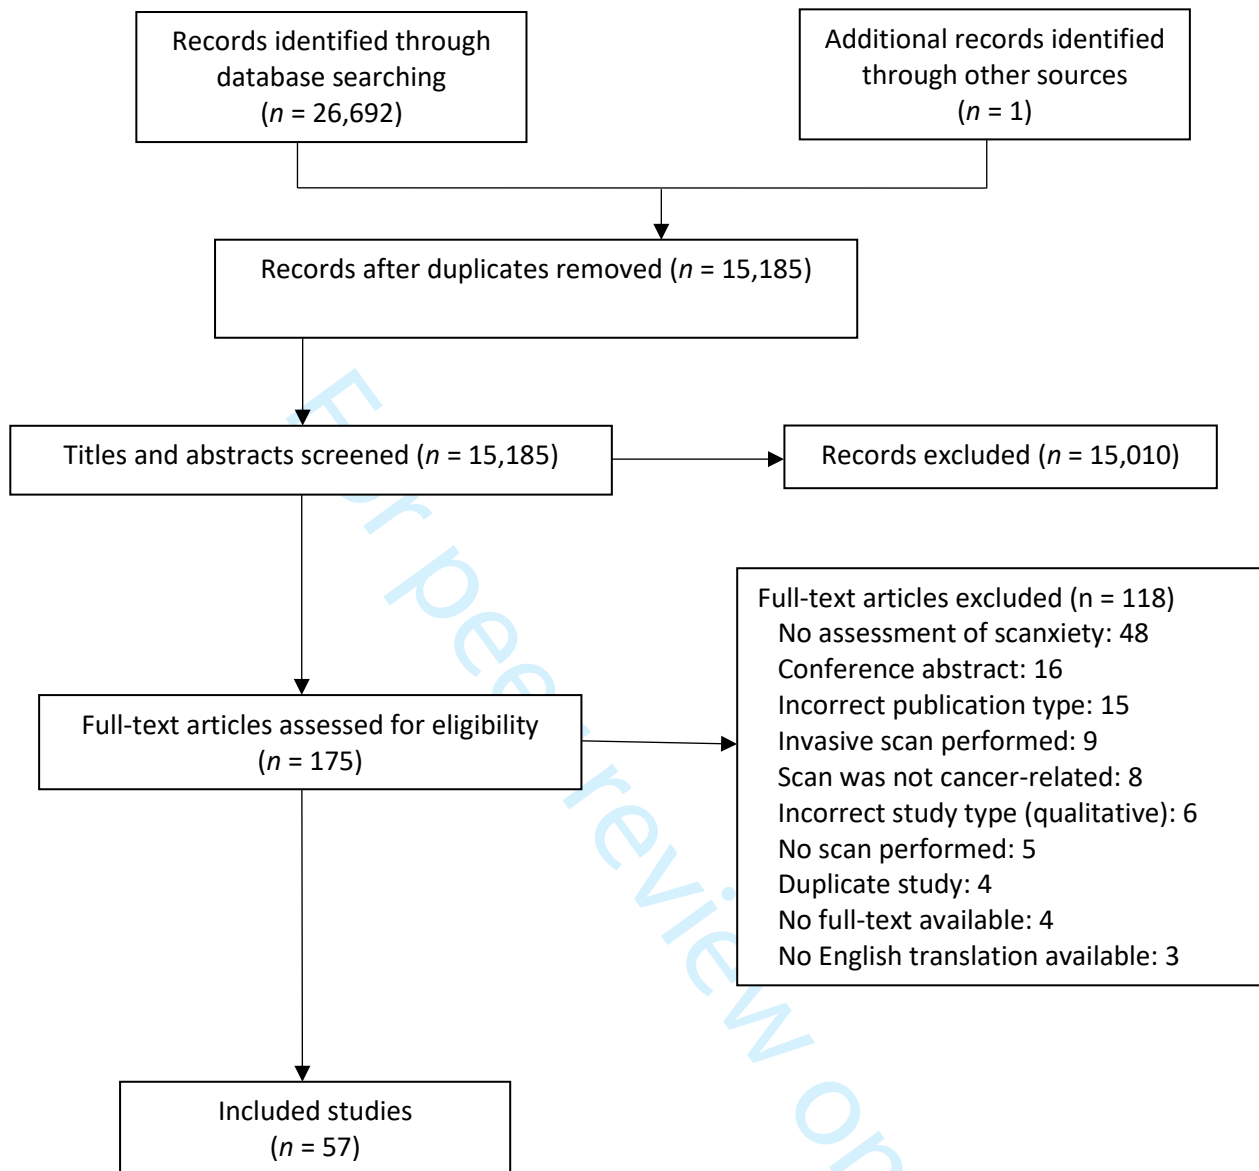

1  
2  
3 **Supplementary File 1. Protocol**

4 **Scanxiety: A scoping review about scan-associated anxiety**

5  
6 Protocol

7  
8 Version 1.0, 10/04/2019  
9

10  
11 **Authors**

12 Dr Kim Tam Bui

13 Dr Roger Liang

14 Dr Haryana Dhillon

15 Dr Belinda Kiely

16 Dr Prunella Blinman  
17  
18  
19  
20  
21  
22

23 **Correspondence**

24 Dr Kim Tam Bui

25 Email: [tam.bui@health.nsw.gov.au](mailto:tam.bui@health.nsw.gov.au)

26 Concord Cancer Centre

27 Concord Repatriation General Hospital

28 1A Hospital Road

29 Concord NSW 2137  
30  
31  
32  
33  
34  
35  
36  
37  
38  
39  
40  
41  
42  
43  
44  
45  
46  
47  
48  
49  
50  
51  
52  
53  
54  
55  
56  
57  
58  
59  
60

## Introduction

Radiological scans are necessary to diagnose and stage cancers, to monitor for cancer recurrence or progression or to investigate new cancer- or treatment-related problems. Imaging modalities include plain X-rays, computed tomography (CT) scans, positron-emission tomography (PET) scans, magnetic resonance imaging (MRI), ultrasound and nuclear medicine bone scans.

Distress before, during or after a scan has been dubbed “scanxiety” by a patient writing for the Time Magazine in 2011[1]. This is a common clinical problem that is widely discussed on social media and patient forms, but there is a paucity in the literature about this topic. This systematic scoping study aims to increase the understanding about scanxiety.

## Objectives

The objectives of this study are to:

- determine the incidence and severity of scanxiety in adults who have scans for cancer-related reasons;
- compare tools that measure scanxiety;
- identify contributing and exacerbating determinants of scanxiety;
- identify strategies or interventions that reduce scanxiety; and,
- explore the experiences of scanxiety for patients and other stakeholders

## Methods

This protocol is based on the six-step methodological framework developed by Arskey & O’Malley[2] and modified by Levac *et al.*[3], and guided by the Preferred Reporting Items for Systematic review and Meta-Analysis Protocols extension for Scoping Reviews (PRISMA-ScR) checklist[4].

## ***Inclusion and exclusion criteria***

Publications will be included if they were original full-text research articles that addressed scanxiety in adults over 18 years of age who had a scan for a cancer-related reason. Outcome measures have to include at least one of the following: the incidence of scanxiety; severity of scanxiety; contributing or exacerbating factors of scanxiety; intervention to improve scanxiety, or; experiences of patients with scanxiety. All types of non-interventional imaging modalities are acceptable. Any type or stage of cancer is acceptable, including populations undergoing cancer screening. No date or language restriction will be applied to electronic database searching.

Interventional imaging will be excluded. Review articles, editorials, letters and protocols will be excluded.

### ***Search protocol***

A systematic review of the following electronic databases will be conducted by one author (KTB): Ovid MEDLINE, Ovid EMBASE, Ovid PsycINFO, Ovid Cochrane, Scopus, ESCBO CINAHL and PubMed. The search strategy will combine the subject headings and keywords of cancer (neoplasm\* or cancer\* or malignan\* or tum??r\* or oncolog\* or carcinoma\*), imaging (diagnostic imaging or imaging or scan\* or tomography or ultraso\* or radionucl\*) and anxiety (anxi\* or fear\* or worr\* or distress\*). Hand searching of reference lists of included articles will be undertaken.

All references will be imported into Endnote V9. After removal of duplicates, two authors (KTB and RL) will independently review and screen publication titles and abstracts for eligibility. Of the articles deemed potentially eligible, the full text of the article will be evaluated for final inclusion. Discrepancies will be decided by discussion between the two authors (KTB and RL), and will be escalated to all authors if a consensus cannot be reached.

### ***Data extraction and analysis***

Standardised data collection forms will be developed. Relevant data will be independently extracted from by two authors (KTB and RL) into an electronic data extraction form (Table 1).

Table 1. Included data items on the electronic data extraction form

|                     |                                                                                                                       |
|---------------------|-----------------------------------------------------------------------------------------------------------------------|
| Publication details | Study name/Title of article<br>Study authors<br>Date of publication (year)<br>Country the study was held              |
| Study details       | Study aims<br>Population including age, gender, type of cancer<br>Study design<br>Measurement tool used for scanxiety |
| Results/outcomes    | Sample size<br>Demographics – gender, age<br>Cancer factors – type of cancers included<br>Incidence of scanxiety      |

|  |                                                              |
|--|--------------------------------------------------------------|
|  | Severity of scanxiety                                        |
|  | Contributing and exacerbating determinants of scanxiety      |
|  | Experiences of scanxiety for patients and other stakeholders |
|  | If intervention: efficacy                                    |

Data will be analysed depending on the population who underwent imaging (eg for screening, for early cancer or for advanced cancer) and the type of study (eg observational or intervention). Quantitative findings will be synthesised using summary statistics including the mean and range.

### **Consultation**

Health care professionals with clinical experience in oncology and psychology will be consulted for content expertise and to discuss preliminary findings.

### **References**

1. Feiler B. Scanxiety. Fear of a postcancer ritual. *Time*. 2011;177(24):56.
2. Arksey H, O'Malley L. Scoping studies: towards a methodological framework. *International Journal of Social Research Methodology*. 2005;8(1):19-32.
3. Levac D, Colquhoun H, O'Brien KK. Scoping studies: advancing the methodology. *Implement Sci*. 2010;5:69.
4. Tricco AC, Lillie E, Zarin W, O'Brien KK, Colquhoun H, Levac D, et al. PRISMA Extension for Scoping Reviews (PRISMA-ScR): Checklist and Explanation. *Ann Intern Med*. 2018;169(7):467-73.

1  
2  
3  
4  
5  
6  
7  
8  
9  
10  
11  
12  
13  
14  
15  
16  
17  
18  
19  
20  
21  
22  
23  
24  
25  
26  
27  
28  
29  
30  
31  
32  
33  
34  
35  
36  
37  
38  
39  
40  
41  
42  
43  
44  
45  
46  
47  
48  
49  
50  
51  
52  
53  
54  
55  
56  
57  
58  
59  
60

For peer review only

**Supplementary File 3. Protocol amendments****Scanxiety: A scoping review about scan-associated anxiety**

The original protocol dated 10/04/2019 was amended as per the following statements:

- 1) The objective 'to explore the experiences of scanxiety for patients and other stakeholders' was abandoned due to feasibility of conducting qualitative and quantitative data analysis with the volume of literature identified
- 2) Inclusion criteria were updated to reflect changes in Amendment 1: experiences of patients with scanxiety were not included; only studies that quantitatively assessed prevalence and severity of scanxiety or met one of the other objectives were included
- 3) As per recommendations on scoping review methodology, exclusion criteria were updated *post hoc* and were expanded to also exclude studies involving follow-up scans for a positive screening result, because the psychological experiences of asymptomatic persons facing a potential new cancer diagnosis may lead to higher anxiety than is attribute to scanxiety itself.
- 4) Exclusion criteria were also updated to reflect changes in Amendment 1, where studies that only qualitatively assessed scanxiety were excluded



## Research checklist

**Scanxiety: A scoping review about scan-associated anxiety**

## Preferred Reporting Items for Systematic reviews and Meta-Analyses extension for Scoping Reviews (PRISMA-ScR) Checklist

| SECTION                          | ITEM | PRISMA-ScR CHECKLIST ITEM                                                                                                                                                                                                                                                                                  | REPORTED ON PAGE # |
|----------------------------------|------|------------------------------------------------------------------------------------------------------------------------------------------------------------------------------------------------------------------------------------------------------------------------------------------------------------|--------------------|
| <b>TITLE</b>                     |      |                                                                                                                                                                                                                                                                                                            |                    |
| Title                            | 1    | Identify the report as a scoping review.                                                                                                                                                                                                                                                                   | 1                  |
| <b>ABSTRACT</b>                  |      |                                                                                                                                                                                                                                                                                                            |                    |
| Structured summary               | 2    | Provide a structured summary that includes (as applicable): background, objectives, eligibility criteria, sources of evidence, charting methods, results, and conclusions that relate to the review questions and objectives.                                                                              | 2                  |
| <b>INTRODUCTION</b>              |      |                                                                                                                                                                                                                                                                                                            |                    |
| Rationale                        | 3    | Describe the rationale for the review in the context of what is already known. Explain why the review questions/objectives lend themselves to a scoping review approach.                                                                                                                                   | 3                  |
| Objectives                       | 4    | Provide an explicit statement of the questions and objectives being addressed with reference to their key elements (e.g., population or participants, concepts, and context) or other relevant key elements used to conceptualize the review questions and/or objectives.                                  | 3                  |
| <b>METHODS</b>                   |      |                                                                                                                                                                                                                                                                                                            |                    |
| Protocol and registration        | 5    | Indicate whether a review protocol exists; state if and where it can be accessed (e.g., a Web address); and if available, provide registration information, including the registration number.                                                                                                             | 3                  |
| Eligibility criteria             | 6    | Specify characteristics of the sources of evidence used as eligibility criteria (e.g., years considered, language, and publication status), and provide a rationale.                                                                                                                                       | 3-4                |
| Information sources              | 7    | Describe all information sources in the search (e.g., databases with dates of coverage and contact with authors to identify additional sources), as well as the date the most recent search was executed.                                                                                                  | 3                  |
| Search                           | 8    | Present the full electronic search strategy for at least 1 database, including any limits used, such that it could be repeated.                                                                                                                                                                            | Figure 1           |
| Selection of sources of evidence | 9    | State the process for selecting sources of evidence (i.e., screening and eligibility) included in the scoping review.                                                                                                                                                                                      | 4                  |
| Data charting process            | 10   | Describe the methods of charting data from the included sources of evidence (e.g., calibrated forms or forms that have been tested by the team before their use, and whether data charting was done independently or in duplicate) and any processes for obtaining and confirming data from investigators. | 4                  |
| Data items                       | 11   | List and define all variables for which data were sought and any assumptions and simplifications made.                                                                                                                                                                                                     | 4                  |

| SECTION                                              | ITEM | PRISMA-ScR CHECKLIST ITEM                                                                                                                                                                             | REPORTED ON PAGE #                   |
|------------------------------------------------------|------|-------------------------------------------------------------------------------------------------------------------------------------------------------------------------------------------------------|--------------------------------------|
| Critical appraisal of individual sources of evidence | 12   | If done, provide a rationale for conducting a critical appraisal of included sources of evidence; describe the methods used and how this information was used in any data synthesis (if appropriate). | N/A                                  |
| Synthesis of results                                 | 13   | Describe the methods of handling and summarizing the data that were charted.                                                                                                                          | 4                                    |
| <b>RESULTS</b>                                       |      |                                                                                                                                                                                                       |                                      |
| Selection of sources of evidence                     | 14   | Give numbers of sources of evidence screened, assessed for eligibility, and included in the review, with reasons for exclusions at each stage, ideally using a flow diagram.                          | Figure 2                             |
| Characteristics of sources of evidence               | 15   | For each source of evidence, present characteristics for which data were charted and provide the citations.                                                                                           | 5-10, including Tables 1 and 2       |
| Critical appraisal within sources of evidence        | 16   | If done, present data on critical appraisal of included sources of evidence (see item 12).                                                                                                            | N/A                                  |
| Results of individual sources of evidence            | 17   | For each included source of evidence, present the relevant data that were charted that relate to the review questions and objectives.                                                                 | 11-18, including Tables 3,4, 5 and 6 |
| Synthesis of results                                 | 18   | Summarize and/or present the charting results as they relate to the review questions and objectives.                                                                                                  | 11-18                                |
| <b>DISCUSSION</b>                                    |      |                                                                                                                                                                                                       |                                      |
| Summary of evidence                                  | 19   | Summarize the main results (including an overview of concepts, themes, and types of evidence available), link to the review questions and objectives, and consider the relevance to key groups.       | 18-19                                |
| Limitations                                          | 20   | Discuss the limitations of the scoping review process.                                                                                                                                                | 19                                   |
| Conclusions                                          | 21   | Provide a general interpretation of the results with respect to the review questions and objectives, as well as potential implications and/or next steps.                                             | 19                                   |
| <b>FUNDING</b>                                       |      |                                                                                                                                                                                                       |                                      |
| Funding                                              | 22   | Describe sources of funding for the included sources of evidence, as well as sources of funding for the scoping review. Describe the role of the funders of the scoping review.                       | 20                                   |

# BMJ Open

## Scanxiety: A scoping review about scan-associated anxiety

|                                 |                                                                                                                                                                                                                                                                                                                                                                                                                                                                                                                                                         |
|---------------------------------|---------------------------------------------------------------------------------------------------------------------------------------------------------------------------------------------------------------------------------------------------------------------------------------------------------------------------------------------------------------------------------------------------------------------------------------------------------------------------------------------------------------------------------------------------------|
| Journal:                        | <i>BMJ Open</i>                                                                                                                                                                                                                                                                                                                                                                                                                                                                                                                                         |
| Manuscript ID                   | bmjopen-2020-043215.R2                                                                                                                                                                                                                                                                                                                                                                                                                                                                                                                                  |
| Article Type:                   | Original research                                                                                                                                                                                                                                                                                                                                                                                                                                                                                                                                       |
| Date Submitted by the Author:   | 09-Mar-2021                                                                                                                                                                                                                                                                                                                                                                                                                                                                                                                                             |
| Complete List of Authors:       | Bui, Kim Tam; Concord Repatriation General Hospital, Medical Oncology; The University of Sydney Sydney Medical School<br>Liang, Roger; Concord Repatriation General Hospital, Medical Oncology<br>Kiely, Belinda; Concord Repatriation General Hospital, Medical Oncology; The University of Sydney Sydney Medical School<br>Brown, Chris; NHMRC Clinical Trials Centre<br>Dhillon, Haryana; The University of Sydney, Psycho-Oncology Cooperative Research Group; CEMPED<br>Blinman, Prunella; Concord Repatriation General Hospital, Medical Oncology |
| <b>Primary Subject Heading</b>: | Oncology                                                                                                                                                                                                                                                                                                                                                                                                                                                                                                                                                |
| Secondary Subject Heading:      | Radiology and imaging                                                                                                                                                                                                                                                                                                                                                                                                                                                                                                                                   |
| Keywords:                       | Adult oncology < ONCOLOGY, Diagnostic radiology < RADIOLOGY & IMAGING, Anxiety disorders < PSYCHIATRY                                                                                                                                                                                                                                                                                                                                                                                                                                                   |
|                                 |                                                                                                                                                                                                                                                                                                                                                                                                                                                                                                                                                         |

SCHOLARONE™  
Manuscripts

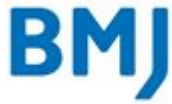

I, the Submitting Author has the right to grant and does grant on behalf of all authors of the Work (as defined in the below author licence), an exclusive licence and/or a non-exclusive licence for contributions from authors who are: i) UK Crown employees; ii) where BMJ has agreed a CC-BY licence shall apply, and/or iii) in accordance with the terms applicable for US Federal Government officers or employees acting as part of their official duties; on a worldwide, perpetual, irrevocable, royalty-free basis to BMJ Publishing Group Ltd ("BMJ") its licensees and where the relevant Journal is co-owned by BMJ to the co-owners of the Journal, to publish the Work in this journal and any other BMJ products and to exploit all rights, as set out in our [licence](#).

The Submitting Author accepts and understands that any supply made under these terms is made by BMJ to the Submitting Author unless you are acting as an employee on behalf of your employer or a postgraduate student of an affiliated institution which is paying any applicable article publishing charge ("APC") for Open Access articles. Where the Submitting Author wishes to make the Work available on an Open Access basis (and intends to pay the relevant APC), the terms of reuse of such Open Access shall be governed by a Creative Commons licence – details of these licences and which [Creative Commons](#) licence will apply to this Work are set out in our licence referred to above.

Other than as permitted in any relevant BMJ Author's Self Archiving Policies, I confirm this Work has not been accepted for publication elsewhere, is not being considered for publication elsewhere and does not duplicate material already published. I confirm all authors consent to publication of this Work and authorise the granting of this licence.

**Title**

Scanxiety: A scoping review about scan-associated anxiety

**Authors:**

Kim Tam Bui<sup>1,2</sup>, Roger Liang<sup>1</sup>, Belinda E Kiely<sup>1,2,3</sup>, Chris Brown<sup>3</sup>, Haryana M Dhillon<sup>4,5</sup> & Prunella Blinman<sup>1,2</sup>

**Affiliations:**

<sup>1</sup>Medical Oncology, Concord Cancer Centre, Concord, NSW, Australia

<sup>2</sup>Sydney Medical School, University of Sydney, Camperdown, NSW, Australia

<sup>3</sup>NHMRC Clinical Trials Centre, University of Sydney, Camperdown, NSW, Australia

<sup>4</sup>Psycho-Oncology Cooperative Research Group, School of Psychology, University of Sydney, Camperdown, NSW, Australia

<sup>5</sup>Centre for Medical Psychology & Evidence-based Decision-making, University of Sydney, Camperdown NSW, Australia

**Corresponding author:**

Prunella Blinman

Postal address: Medical Oncology

Concord Cancer Centre

1A Hospital Road

Concord NSW 2137

Email: [prunella.blinman@health.nsw.gov.au](mailto:prunella.blinman@health.nsw.gov.au)

ORCID ID: 0000-0002-0712-372X

**Word count: 4042**

Keywords: scanxiety, imaging, scans, cancer, anxiety

**Presentations**

Bui, K.T., Liang, R., Kiely, B.E., Brown, C., Dhillon, H.M. & Blinman, P. What is scanxiety? A systematic scoping review [Poster]. Proceedings of the 2020 MOGA Abstract and Poster Program for Medical Oncology Advanced Trainees and Young Oncologists, 2020 August 14-21; Asia Pac J Clin Oncol, 16(2), 30-31.

## Abstract

**Objectives:** To identify the available literature on the prevalence, severity and contributing factors of scan-associated anxiety ('scanxiety'), and interventions to reduce it.

**Design:** Systematic scoping review.

**Data sources:** Ovid MEDLINE, Ovid EMBASE, Ovid PsycINFO, Ovid Cochrane Central Register of Controlled Trials, Scopus, EBSCO CINAHL and PubMed up to July 2020.

**Study selection:** Eligible studies recruited people having a cancer-related non-invasive scan (including screening) and contained a quantitative assessment of scanxiety.

**Data extraction:** Demographics and scanxiety outcomes were recorded for each study and the data summarised by descriptive statistics.

**Results:** Of 26,693 citations, 57 studies were eligible for inclusion across a range of scan types (mammogram 26/57, 46%; positron-emission tomography 14/57, 25%; computed tomography 14/57, 25%) and designs (observation 47/57, 82%; intervention 10/57, 18%). Eighty-one measurement tools were used to quantify the prevalence and/or severity of scanxiety, including purpose-designed Likert scales (17/81, 21%); the State Trait Anxiety Inventory (14/81, 17%) and the Hospital Anxiety and Depression Scale (9/81, 11%). Scanxiety prevalence ranged from 0% to 83%. Mean severity scores appeared low in almost all measures which quantitatively measured scanxiety (54/62, 87%). Moderate to severe scanxiety occurred in 4% to 28% of people in studies using descriptive measures. Nine of 20 studies assessing scanxiety pre- and post-scan reported a significant post-scan reduction in scanxiety. Lower education, smoking, higher levels of pain, higher perceived risk of cancer and diagnostic scans (v screening scans) consistently correlated with higher scanxiety severity, but not age, gender, ethnicity or marital status. Interventions included relaxation, distraction, education and psychological support. Six of the 10 interventions showed a reduction in scanxiety.

**Conclusions:** Prevalence and severity of scanxiety varied widely likely due to heterogeneous methods of measurement. A uniform approach to evaluating scanxiety will improve understanding of the phenomenon and help guide interventions.

## Strengths and limitations of this study

- This is the first scoping review on scanxiety
- A comprehensive search strategy and broad inclusion criteria have resulted in an extensive summary of all available literature
- Summary statistics for prevalence and severity of scanxiety were not possible due to heterogeneity in the type and timing of measurement tools between the studies.

## INTRODUCTION

Anxiety may increase when people have scans to screen for, diagnose, or stage cancer, or to monitor cancer for recurrence or progression. Scan-associated anxiety, or the distress before, during or after a scan, was first dubbed 'scanxiety' by a patient writing for the Time Magazine in 2011[1].

Qualitative research on the experience of having a scan has shown some people experience dread in the weeks before a scan[2], perceive scans as dehumanising, unpleasant or causing claustrophobia[2-5], and find scans trigger fear of the unknown and fear of cancer recurrence[2, 3, 6]. Scanxiety is recognised as a common clinical concern on social media and public forums, and is acknowledged by international cancer institutions[7, 8] and cancer-specific support networks[9-11]. Despite this, scanxiety is not uniformly recognised or measured in published studies. We conducted a systematic scoping review to identify the available literature on scanxiety in people having cancer-related scans.

## METHODS

We conducted a systematic scoping review based on the six-step methodological framework developed by Arskey & O'Malley[12] and modified by Levac *et al.*[13], and guided by the Preferred Reporting Items for Systematic review and Meta-Analysis protocols extension for Scoping Reviews (PRISMA-ScR) checklist[14]. The study protocol and amendments are available (**Supplementary File 1 & 2**).

### Step 1: Research question

Our aim was to increase the understanding of scanxiety by: determining the prevalence and severity of scanxiety; identifying contributing factors to scanxiety; identifying interventions to reduce scanxiety in people having cancer-related scans; and, exploring patient experiences with scanxiety.

### Step 2: Search strategy

Published studies were identified from seven electronic databases: Ovid MEDLINE (1946 onwards), Ovid EMBASE (1947 onwards), Ovid PsycINFO (1806 onwards), Ovid Cochrane Central Register of Controlled Trials (1991 onwards), Scopus (any year), EBSCO CINAHL (any year) and PubMed (any year). The search strategy combined the subject headings and keywords of cancer, imaging and anxiety. An example is provided in **Figure 1**. Reference lists of included articles were hand-searched for additional studies. All references were imported into Endnote V9.

The initial search was conducted on April 11, 2019, and updated on July 3, 2020.

### Step 3: Study selection

Inclusion criteria were full-text original research studies that recruited adults ( $\geq 18$  years old) who had a non-invasive scan for a cancer-related reason, and which quantitatively assessed the prevalence or severity of scanxiety, reported a statistical comparison between pre- and post-scan scanxiety, reported a

1  
2  
3 statistical comparison between scanxiety and possible contributing factors, or evaluated the impact of  
4 an intervention on scanxiety.  
5

6 Cancer-related reasons included screening (detection of cancer in asymptomatic person), diagnosis  
7 (detection of cancer in symptomatic person), staging (determining extent of cancer in person with  
8 confirmed or suspected cancer), surveillance (detection of recurrence in person with cancer treated with  
9 curative intent) or monitoring (detection of progression in person with cancer treated with non-curative  
10 intent).  
11

12  
13 The measurement of scanxiety was defined as any measure of anxiety, distress or worry occurring  
14 around the time of a scan. This included any period before, during or after a scan where the scan was  
15 used as a reference point for the measurement of scanxiety. All non-invasive imaging modalities were  
16 accepted. No date restrictions were applied. Foreign language material was included if an English  
17 translation was available.  
18

19  
20 After initial review of citations and based on increasing familiarity with the literature, and in line with  
21 recommendations on scoping review methodology[12], exclusion criteria were developed *post hoc*.  
22 Exclusion criteria were: studies involving invasive scans (eg transvaginal ultrasound, ultrasound with fine  
23 needle aspirate, or endoscopic ultrasound) due to differences in scan preparation and risk of adverse  
24 events; and, studies of scans performed to investigate a positive initial screening result because the  
25 psychological experiences of asymptomatic persons facing a potential new cancer diagnosis may lead to  
26 higher anxiety than is attributable to scanxiety. Due to feasibility of conducting quantitative and  
27 qualitative analysis with the volume of literature identified, studies reporting only a qualitative  
28 assessment of scanxiety were also excluded, and the objective to explore patient experiences was  
29 abandoned.  
30  
31

32  
33 After removal of duplicate citations, two authors (KTB, RL) independently reviewed and screened  
34 publication titles and abstracts based on the eligibility criteria. Of the studies deemed potentially  
35 eligible, full texts were evaluated for final inclusion. Discrepancies were resolved by discussion between  
36 the two authors (KTB, RL) and were escalated to all authors if a consensus could not be reached.  
37  
38  
39

#### 40 **Step 4: Charting the data**

41  
42 Relevant data were independently extracted by two authors (KTB, RL) into an electronic data extraction  
43 form in Microsoft Excel, which included study demographics and methodology, scanxiety measurement  
44 tools, and the outcome measures of prevalence and severity of scanxiety, contributing factors to  
45 scanxiety, and interventions to reduce scanxiety.  
46  
47  
48

#### 49 **Step 5: Collating, summarizing and reporting the results**

50  
51 Study data was tabulated to assist with a descriptive numerical summary of the range of cancer types,  
52 imaging modalities, study methodology and scanxiety measurement tools. Associations between  
53 scanxiety and potential contributing factors were tabulated if three or more studies reported a  
54 statistical comparison.  
55  
56  
57  
58



1  
2  
3 The prevalence of scanxiety was identified in two ways:  
4

- 5 • The percentage of people who scored above the pre-specified clinically important anxiety  
6 threshold, if reported; or,
- 7 • The percentage of people who scored any degree of anxiety, if no pre-specified threshold was  
8 reported.  
9

10 Severity of scanxiety was defined in three ways:

- 11 • Any mean score of the anxiety measure above the pre-specified clinically important anxiety  
12 threshold, if reported;
- 13 • Any mean score of the anxiety measure that was at least half the total score, if an anxiety  
14 threshold was not reported; or
- 15 • At least 'moderate' anxiety (or its equivalent) on a descriptive range.  
16  
17  
18

19 The definitions of prevalence and severity were purposive-designed to allow descriptive comparisons  
20 between the studies as we anticipated heterogeneity in scanxiety measurement would preclude  
21 meaningful summary statistics.  
22

23 The components of intervention studies and their effect on scanxiety were summarised and reported  
24 descriptively.  
25  
26  
27

## 28 **Step 6: Consultation**

29  
30 Medical oncologists (PB, BK), a behavioural scientist (HD) and a statistician (CB) were consulted for  
31 content expertise to develop the study objectives and to improve clarity on clinically relevant  
32 interpretations of the data.  
33  
34  
35

## 36 **Patient and public involvement**

37  
38 This research did not directly involve patients and public. Our research was initiated by repeated  
39 observations of scanxiety in oncology patients.  
40  
41  
42

## 43 **RESULTS**

44  
45 The study search identified 26,693 citations. The selection process is outlined in **Figure 2**. After removal  
46 of duplicates, abstract and title screening, and full-text review, 57 eligible studies involving 21,352  
47 people were included.  
48  
49  
50

## 51 **Demographics and study details**

52  
53 Observational studies  
54  
55  
56  
57  
58

1  
2  
3 There were 47 observational studies (**Table 1**) involving 19,498 people[15-61]. Participants most  
4 commonly had scans for breast cancer (22 studies,  $n=14,338$  women[16, 18-27, 29, 31, 36, 38, 40, 42,  
5 43, 45, 48, 56, 58]), the most common scans were mammograms (21 studies[16, 18-27, 29, 31, 36, 38,  
6 40, 42, 43, 45, 48, 56]), and most studies used self-report surveys to assess scanxiety (40 studies[15, 16,  
7 18-36, 38, 40-54, 56, 58, 59]).  
8  
9  
10  
11  
12  
13  
14  
15  
16  
17  
18  
19  
20  
21  
22  
23  
24  
25  
26  
27  
28  
29  
30  
31  
32  
33  
34  
35  
36  
37  
38  
39  
40  
41  
42  
43  
44  
45  
46  
47  
48  
49  
50  
51  
52  
53  
54  
55  
56  
57  
58

For peer review only

**Table 1.** Demographics and study details for the 47 observational studies

| First author                    | Year | n    | Country of study     | Cancer type   | Age (years) (Mean <sup>a</sup> )                                               | Female (%) | Married or de facto (%) | At least secondary education (%) | First scan (%) | Scan type              | Reason for scan           | Methods                   |
|---------------------------------|------|------|----------------------|---------------|--------------------------------------------------------------------------------|------------|-------------------------|----------------------------------|----------------|------------------------|---------------------------|---------------------------|
| Andolf[15]                      | 1990 | 275  | Sweden               | Ovarian       | NR                                                                             | 100        | NR                      | NR                               | NR             | Abdominal ultrasound   | Screening                 | Cross-sectional survey    |
| Bull <sup>b,c</sup> [16]        | 1991 | 541  | UK                   | Breast        | 50 to 54: 23%<br>55 to 59s 29%<br>60 to 64: 34%<br>65 to 70: 7%<br>Unknown: 7% | 100        | NR                      | NR                               | NR             | Mammogram              | Screening                 | Longitudinal surveys      |
| Peteet[17]                      | 1992 | 79   | USA                  | Any           | NR                                                                             | NR         | NR                      | NR                               | 4              | CT                     | Any (except screening)    | Cross-sectional interview |
| Cockburn <sup>c</sup> [18]      | 1994 | 200  | Australia            | Breast        | NR                                                                             | 100        | NR                      | NR                               | NR             | Mammogram              | Screening                 | Longitudinal surveys      |
| Ellman <sup>c</sup> [19]        | 1995 | 331  | UK                   | Breast        | 50 to 64: 52%<br>65 to 78: 48%                                                 | 100        | NR                      | NR                               | NR             | Mammogram              | Screening or surveillance | Cross-sectional survey    |
| Sutton <sup>c,d</sup> [20]      | 1995 | 306  | UK                   | Breast        | 58                                                                             | 100        | 76                      | 50                               | NR             | Mammogram              | Screening                 | Longitudinal surveys      |
| Bakker[21]                      | 1998 | 315  | Canada               | Breast        | 61                                                                             | 100        | 71                      | 76                               | 50             | Mammogram              | Screening                 | Longitudinal surveys      |
| Gupta[22]                       | 1999 | 167  | Kuwait               | Breast        | Range 14 to 63                                                                 | 100        | NR                      | 82                               | NR             | Mammogram ± ultrasound | Screening or diagnosis    | Cross-sectional survey    |
| Hafslund[23]                    | 2000 | 170  | Norway               | Breast        | NR                                                                             | 100        | NR                      | NR                               | NR             | Mammogram              | Diagnosis                 | Longitudinal surveys      |
| Meystre-Agustoni[24]            | 2001 | 887  | Switzerland          | Breast        | 50 to 54: 36%<br>55 to 59: 22%<br>60 to 64: 20%<br>65 to 69: 22%               | 100        | 77                      | 62                               | 27             | Mammogram              | Screening                 | Longitudinal surveys      |
| Drossaert[25]                   | 2002 | 2657 | Netherlands          | Breast        | 58                                                                             | 100        | 78                      | 32                               | NR             | Mammogram              | Screening                 | Longitudinal surveys      |
| Sandin <sup>c,d</sup> [26]      | 2002 | 598  | Spain                | Breast        | 51                                                                             | 100        | 77                      | 41                               | NR             | Mammogram              | Screening                 | Longitudinal surveys      |
| Brunton[27]                     | 2005 | 584  | New Zealand          | Breast        | 50 to 54: 38%<br>55 to 59: 35%<br>60 to 64: 27%                                | 100        | NR                      | 74                               | <20%           | Mammogram              | Screening                 | Cross-sectional survey    |
| Geurts[28]                      | 2006 | 106  | Netherlands          | Head and neck | 56                                                                             | 36         | NR                      | 29                               | NR             | Chest X-ray            | Surveillance              | Cross-sectional survey    |
| Tyndel <sup>c</sup> [29]        | 2007 | 1174 | UK                   | Breast        | 43                                                                             | 100        | 83                      | 33                               | 87             | Mammogram              | Screening                 | Longitudinal surveys      |
| Bunge <sup>b</sup> [30]         | 2008 | 324  | Netherlands, Belgium | Lung          | 60                                                                             | 49         | NR                      | NR                               | NR             | CT                     | Screening                 | Longitudinal surveys      |
| Brown Sofair <sup>b</sup> [31]  | 2008 | 47   | USA                  | Breast        | 50                                                                             | 100        | 34                      | 80                               | NR             | Mammogram              | Screening                 | Longitudinal surveys      |
| van den Bergh <sup>b</sup> [32] | 2008 | 324  | Netherlands, Belgium | Lung          | 60                                                                             | 49         | 64                      | 82                               | 66             | CT                     | Screening                 | Longitudinal surveys      |
| Westerterp <sup>b</sup> [33]    | 2008 | 82   | Netherlands          | Oesophageal   | 64                                                                             | 18         | NR                      | NR                               | NR             | CT + PET               | Diagnosis & staging       | Cross-sectional survey    |
| Bastiaannet[34]                 | 2009 | 59   | Netherlands          | Melanoma      | Median: 59                                                                     | 44         | 69                      | 66                               | NR             | CT, PET ± Chest X-ray  | Staging                   | Cross-sectional survey    |
| Vierikko <sup>b</sup> [35]      | 2009 | 601  | Finland              | Lung          | 65                                                                             | 0          | 36                      | NR                               | NR             | CT                     | Screening                 | Longitudinal surveys      |

|    |                            |      |      |                 |                           |            |     |    |    |     |                              |                                    |                           |
|----|----------------------------|------|------|-----------------|---------------------------|------------|-----|----|----|-----|------------------------------|------------------------------------|---------------------------|
| 1  |                            |      |      |                 |                           |            |     |    |    |     |                              |                                    |                           |
| 2  |                            |      |      |                 |                           |            |     |    |    |     |                              |                                    |                           |
| 3  |                            |      |      |                 |                           |            |     |    |    |     |                              |                                    |                           |
| 4  | Bolukbas[36]               | 2010 | 93   | Turkey          | Breast                    | 48         | 100 | 97 | 10 | 45  | Mammogram                    | Screening or diagnosis             | Cross-sectional survey    |
| 5  | Thompson[37]               | 2010 | 70   | USA             | Lymphoma                  | Median: 47 | 64  | 53 | 97 | NR  | CT                           | Surveillance                       | Cross-sectional interview |
| 6  |                            |      |      |                 |                           |            |     |    |    |     |                              |                                    |                           |
| 7  | Hutton <sup>b</sup> [38]   | 2011 | 527  | UK              | Breast                    | Median: 40 | 100 | 79 | NR | 75  | Mammogram ± MRI              | Screening                          | Longitudinal surveys      |
| 8  |                            |      |      |                 |                           |            |     |    |    |     |                              |                                    |                           |
| 9  | Pifarre[39]                | 2011 | 200  | Spain           | Any                       | 52         | 51  | NR | NR | 67  | PET/CT                       | Any (except screening)             | Cross-sectional interview |
| 10 |                            |      |      |                 |                           |            |     |    |    |     |                              |                                    |                           |
| 11 | Steinemann[40]             | 2011 | 227  | USA             | Breast                    | NR         | 100 | NR | NR | NR  | Mammogram                    | Screening or diagnosis             | Cross-sectional survey    |
| 12 | Yu[41]                     | 2011 | 398  | Brazil          | Any                       | 54         | 79  | 56 | 57 | 27  | Any                          | Any (except screening)             | Cross-sectional survey    |
| 13 |                            |      |      |                 |                           |            |     |    |    |     |                              |                                    |                           |
| 14 | Bredart <sup>b</sup> [42]  | 2012 | 637  | France          | Breast                    | 50         | 100 | NR | 87 | NR  | Mammogram ± ultrasound ± MRI | Screening or surveillance          | Longitudinal surveys      |
| 15 |                            |      |      |                 |                           |            |     |    |    |     |                              |                                    |                           |
| 16 | Hafslund <sup>c</sup> [43] | 2012 | 4249 | Norway          | Breast                    | 58         | 100 | NR | 52 | NR  | Mammogram                    | Screening                          | Cross-sectional survey    |
| 17 | Adams <sup>c</sup> [44]    | 2014 | 36   | Netherlands     | Lymphoma                  | 50         | 42  | NR | NR | NR  | CT & MRI                     | Staging                            | Cross-sectional survey    |
| 18 | Baena-Canada[45]           | 2014 | 434  | Spain           | Breast                    | 54         | 100 | 72 | 43 | 18  | Mammogram                    | Screening                          | Cross-sectional survey    |
| 19 | Andersson[46]              | 2015 | 169  | Sweden          | Any                       | 64         | 47  | 62 | 62 | 100 | PET/CT                       | Any (except screening)             | Cross-sectional survey    |
| 20 |                            |      |      |                 |                           |            |     |    |    |     |                              |                                    |                           |
| 21 | Elboga[47]                 | 2015 | 144  | Turkey          | Any                       | 63         | 46  | 83 | 52 | NR  | PET/CT                       | Any (except screening)             | Cross-sectional survey    |
| 22 |                            |      |      |                 |                           |            |     |    |    |     |                              |                                    |                           |
| 23 | Hobbs[48]                  | 2015 | 49   | Australia       | Breast                    | 55         | 100 | 79 | NR | 75  | Mammogram ± MRI              | Diagnosis                          | Longitudinal surveys      |
| 24 | Baum[49]                   | 2016 | 103  | USA             | Lung                      | Median: 67 | 61  | 73 | 53 | NR  | CT, PET ± MRI                | Monitoring                         | Cross-sectional survey    |
| 25 | Abreu[50]                  | 2017 | 232  | Portugal        | Any                       | 61         | 51  | NR | 73 | 71  | PET/CT                       | Any (except screening)             | Longitudinal surveys      |
| 26 |                            |      |      |                 |                           |            |     |    |    |     |                              |                                    |                           |
| 27 | Grilo[51]                  | 2017 | 81   | Spain, Portugal | Any                       | 55         | 53  | NR | 41 | 47  | PET/CT                       | Any (except screening)             | Longitudinal surveys      |
| 28 | Evans[52]                  | 2018 | 115  | UK              | Colorectal or Lung        | 66         | 33  | NR | NR | NR  | Whole body MRI, PET + CT     | Staging                            | Longitudinal surveys      |
| 29 |                            |      |      |                 |                           |            |     |    |    |     |                              |                                    |                           |
| 30 | Goense[53]                 | 2018 | 27   | Netherlands     | Oesophageal               | 64         | 15  | NR | NR | NR  | MRI + PET/CT                 | Staging & monitoring               | Cross-sectional survey    |
| 31 | Hall[54]                   | 2018 | 169  | USA             | Lung                      | 64         | 51  | 58 | 96 | NR  | Low dose CT                  | Screening                          | Cross-sectional survey    |
| 32 | Derry[55]                  | 2019 | 94   | USA             | Any                       | 61         | 72  | NR | 69 | 0   | Any                          | Monitoring                         | Longitudinal interview    |
| 33 | Soriano[56]                | 2019 | 57   | USA             | Breast                    | 58         | 100 | 93 | NR | 0   | Mammogram                    | Surveillance                       | Longitudinal survey       |
| 34 | Taghizadeh[57]             | 2019 | 1237 | Canada          | Lung                      | 63         | 56  | NR | 85 | NR  | CT                           | Screening                          | Longitudinal interview    |
| 35 | Bancroft[58]               | 2020 | 88   | UK, Ireland     | Breast                    | 38         | 61  | 50 | 83 | NR  | MRI                          | Screening                          | Longitudinal survey       |
| 36 |                            |      |      |                 |                           |            |     |    |    |     |                              |                                    |                           |
| 37 | Grilo[59]                  | 2020 | 94   | Portugal        | Any                       | 61         | 54  | NR | 99 | 77  | PET + bone scan              | Staging, monitoring & surveillance | Longitudinal survey       |
| 38 |                            |      |      |                 |                           |            |     |    |    |     |                              |                                    |                           |
| 39 | Morreale[60]               | 2020 | 87   | USA             | Gastrointestinal and Lung | 62         | 55  | NR | 92 | NR  | CT or MRI                    | Monitoring                         | Longitudinal interview    |
| 40 |                            |      |      |                 |                           |            |     |    |    |     |                              |                                    |                           |
| 41 | Paiella[61]                | 2020 | 54   | Italy           | Pancreatic                | 50         | 61  | NR | NR | NR  | MRI – MRCP                   | Screening                          | Cross-sectional interview |
| 42 |                            |      |      |                 |                           |            |     |    |    |     |                              |                                    |                           |
| 43 |                            |      |      |                 |                           |            |     |    |    |     |                              |                                    |                           |
| 44 |                            |      |      |                 |                           |            |     |    |    |     |                              |                                    |                           |
| 45 |                            |      |      |                 |                           |            |     |    |    |     |                              |                                    |                           |
| 46 |                            |      |      |                 |                           |            |     |    |    |     |                              |                                    |                           |
| 47 |                            |      |      |                 |                           |            |     |    |    |     |                              |                                    |                           |

1  
2  
3 UK United Kingdom, USA United States of America, NR not reported, CT computed tomography, PET positron emission tomography, MRI magnetic resonance imaging, MRCP Magnetic resonance  
4 cholangiopancreatography

5 All percentages were rounded to the nearest whole number

6 <sup>a</sup>Unless otherwise stated

7 <sup>b</sup>Demographic data is based on participants who completed the first survey

8 <sup>c</sup>These studies collected data from other groups who were not included in this review as they did not meet eligibility criteria. This included people having invasive procedures such as fine needle  
9 aspirate or open surgical biopsy[16, 33], people with abnormal screening results[18, 26, 29] and people who did not have a scan[18-20, 43]

10 <sup>d</sup>Demographics based on the entire population even if not all participants were eligible for this review.

11 <sup>e</sup>Four paediatric participants were included in this study.  
12  
13  
14  
15  
16  
17  
18  
19  
20  
21  
22  
23  
24  
25  
26  
27  
28  
29  
30  
31  
32  
33  
34  
35  
36  
37  
38  
39  
40  
41  
42  
43

For peer review only

1  
2  
3 Twenty-one studies were conducted in people having scans for screening[15, 16, 18, 20, 21, 24-27, 29-  
4 32, 35, 38, 43, 45, 54, 57, 58, 61]. In the remaining studies, reasons for scanning included diagnosis[23,  
5 48], staging[34, 44, 52], monitoring[49, 55, 60], surveillance to detect recurrence[28, 37, 56] or a  
6 combination of reasons in people with known or suspected cancers (17 studies[17, 39, 41, 46, 47, 50, 51,  
7 53, 59]). Five studies permitted scans for both screening and non-screening reasons (namely,  
8 diagnosis[22, 36, 40] or surveillance[19, 42])  
9

10  
11 The mean age of participants, reported by 33 studies, was 56.9 years (range 38 to 66 years)[20, 21, 25,  
12 26, 28-33, 35, 36, 39, 41-48, 50-61]. The majority of participants were women (87%)[15, 16, 18-61].  
13 When studies involving scans for breast cancer were excluded, there were similar proportions of men  
14 and women (women 49%, men 51%)[15, 27, 28, 30, 32-35, 37, 39, 41, 44, 46, 47, 49-55, 57, 59-61].  
15 There was variation in the reporting and proportion of participants who were married (22 studies, range  
16 34% to 97%[20, 21, 24-26, 29, 31, 32, 34-38, 41, 45-49, 54, 56, 58]), who received at least secondary  
17 education (29 studies, range 10% to 99%[20-22, 24-29, 31, 32, 34, 36, 37, 41-43, 45-47, 49-51, 54, 55,  
18 57-60]) and who were attending their first scan (18 studies, range 0% to 100%[17, 21, 24, 27, 29, 32, 36,  
19 38, 39, 41, 45, 46, 48, 50, 51, 55, 56, 59]).  
20  
21  
22  
23  
24

#### 25 Intervention studies

26  
27 There were ten intervention studies (**Table 2**) involving 1,854 people[62-71]. This included people having  
28 scans for breast cancer (6 studies,  $n=1,449$  people[62-65, 69, 70]) and lung cancer (1 study,  $n=16$   
29 people[68]). Scans included mammogram (5 studies[62-64, 69, 70]), positron emission tomography  
30 (PET) with computed tomography (CT; 3 studies[66, 67, 71]), magnetic resonance imaging (MRI)[65],  
31 CT[68] and ultrasound[70] (1 study each). Four studies involved scans for screening[63, 64, 68, 69], one  
32 for diagnosis[65], three for any reason in people with known or suspected cancers[66, 67, 71], and two  
33 where scans for screening, surveillance and/or diagnosis were permitted[62, 70].  
34  
35

36 The mean age of participants was reported by five studies and ranged from 47 to 65 years[63, 65, 68, 69,  
37 71]. The majority were women (94%[62-66, 68-71]). There was variation in the reporting and proportion  
38 of participants who were married (2 studies, 73% and 75%[64, 65]), received at least secondary  
39 education (6 studies, range 28 to 100%[62-65, 68, 69]), and participants attending their first scan (5  
40 studies, range 4% to 54%[62-64, 66, 71]).  
41  
42

43 Eight studies allocated participants to an intervention or control group[63-69, 71], one study compared  
44 two interventions[62] and one study delivered the intervention to all participants[70]. Two interventions  
45 were multifaceted[64, 65]. Types of interventions included: relaxation, distraction, and/or meditation (6  
46 studies[62, 63, 66, 69-71]); education (4 studies[62, 64, 65, 68]); emotional or psychosocial support (2  
47 studies[64, 65]); or, adjustments to routine logistics of the scan (1 study[67]).  
48  
49  
50  
51  
52  
53  
54  
55  
56  
57  
58

**Table 2.** Demographics and study details for the 10 intervention studies to reduce scanxiety

| First author        | Year | n   | Country of study | Cancer type | Age (years) (Mean <sup>a</sup> )                                   | Female (%) | Married or de facto (%) | At least secondary education (%) | First scan (%) | Scan type              | Reason for scan                      | Allocation                  | Intervention and control groups                                           |
|---------------------|------|-----|------------------|-------------|--------------------------------------------------------------------|------------|-------------------------|----------------------------------|----------------|------------------------|--------------------------------------|-----------------------------|---------------------------------------------------------------------------|
| Mainiero[62]        | 2001 | 613 | USA              | Breast      | < 40: 8%<br>50 to 50: 39%<br>50 to 60: 28%<br>>70: 9%              | 100        | NR                      | 95                               | 7              | Mammogram              | Screening or surveillance            | Consecutive <sup>b</sup>    | Educational or entertaining video in waiting room                         |
| Domar[63]           | 2005 | 143 | USA              | Breast      | 52                                                                 | 100        | NR                      | 81                               | 8              | Mammogram              | Screening                            | Randomised                  | Relaxation, music or blank audiotape in waiting room and during scan      |
| Fernandez-Feito[64] | 2005 | 436 | Spain            | Breast      | 50 to 54: 24%<br>55 to 59: 30%<br>60 to 64: 23%<br>65 to 69: 22%   | 100        | 73                      | 28                               | 4              | Mammogram              | Screening                            | Randomised                  | Pre-scan nursing intervention or usual care                               |
| Caruso[65]          | 2006 | 44  | Italy            | Breast      | 47                                                                 | 100        | 75                      | 89                               | NR             | MRI                    | Diagnosis                            | Randomised                  | Pre-scan informative-emotive psychological support or routine information |
| Vogel[66]           | 2012 | 101 | Netherlands      | Any         | Median: 58                                                         | 51         | NR                      | NR                               | 41             | PET/CT                 | Any (except screening)               | Randomised                  | Audiovisual installation or usual care during FDG uptake                  |
| Acuff[67]           | 2014 | 180 | USA              | Any         | NR                                                                 | NR         | NR                      | NR                               | NR             | PET/CT                 | Any (except screening)               | Unclear                     | Hand-held communication device or usual care during scan                  |
| Raz[68]             | 2014 | 16  | USA              | Lung        | 65                                                                 | 75         | NR                      | 100                              | NR             | CT                     | Screening                            | Sequential <sup>c</sup>     | Pre-scan multimedia education or usual care                               |
| Zavotsky[69]        | 2014 | 100 | USA              | Breast      | 54                                                                 | 100        | NR                      | 98                               | NR             | Mammogram              | Screening                            | Non-randomised <sup>d</sup> | Music or no music during scan                                             |
| Ashton[70]          | 2019 | 113 | USA              | Breast      | 18 to 39: 3.6%<br>40 to 59: 51.8%<br>60 to 79: 39.3%<br>> 80: 5.4% | 100        | NR                      | NR                               | NR             | Mammogram ± ultrasound | Screening, surveillance or diagnosis | NA <sup>e</sup>             | Shoulder & neck massage ± hand massage                                    |
| Lorca[71]           | 2019 | 108 | Spain            | Any         | 59                                                                 | 57         | NR                      | NR                               | 54             | PET/CT                 | Any (except screening)               | Randomised                  | Mindfulness meditation or usual care during FDG uptake                    |

USA United States of America, NR not reported, MRI magnetic resonance imaging, PET positron emission tomography, CT computed tomography, FDG fluorodeoxyglucose

All percentages were rounded to the nearest whole number

<sup>a</sup>Unless otherwise stated

<sup>b</sup>Each intervention was administered during one half of the study period

<sup>c</sup>Participants were enrolled into the control arm first, followed by the intervention arm

<sup>d</sup>Participants attending on Mondays, Wednesdays and Fridays were allocated to the intervention arm, and participants attending on Tuesdays and Thursdays were allocated to the control arm

<sup>e</sup>All participants received the intervention

## Scanxiety measurement

Anxiety measurements varied across the studies, with different measurement tools, variants of the same tool, and different range and thresholds applied to tools.

### Observational studies

The 47 observational studies (**Table 3**) used a total of 81 measures of anxiety, with 30 studies using one measure only[15-19, 21, 22, 25-28, 30, 33, 34, 36, 39, 40, 43, 44, 46, 48-51, 53, 55-57, 59, 61], and 17 studies using at least two measures[20, 23, 24, 29, 31, 32, 35, 37, 38, 41, 42, 45, 47, 52, 54, 58, 60].

The most common measures used were: purpose-designed Likert scales (17 studies); the State-Trait Anxiety Inventory (STAI) (14 studies); the anxiety subscale of the Hospital Anxiety and Depression Scale (HADS) (9 studies); the Impact of Event Scale (IES) (6 studies); the Psychological Consequences Questionnaire (PCQ) (3 studies), the Cancer Worry Scale (3 studies), and; the Perceived Stress Scale (2 studies). There were 17 measures used by one study only[15, 20, 22, 26, 31, 32, 35, 52, 54, 56, 58, 60].

Likert scales were varied, with a numerical lower range limit of 0 or 1, and an upper range limit between 3 and 12[17, 20, 24, 25, 33, 40, 44, 46, 48, 50, 52, 53]. Seven studies used a descriptive range[21, 25, 27, 28, 33, 34, 55]. Two studies used both a numerical and a descriptive range[25, 33].

The STAI comprises State and Trait Anxiety subscales with a possible subscale range of 20 to 80. It has no validated anxiety threshold and is usually calculated as a sum of 4-point response options[72]. Included studies used and reported the STAI as a total score[37, 39], using one or both subscales[20, 23, 36, 37, 41, 42, 47, 51, 57, 59], or as a variant (e.g. STAI-6[32, 38, 58]). There were different ranges: none reported[47, 57]; no reported lower limit[41]; no reported upper limit[36]; 0 to 60[39, 51], or; based on a mean of individual item scores[20]. Some studies pre-specified an anxiety threshold of 39[57], 40[37, 41], 46[42], calculated based on the relationship between the anxiety and trait subscales[39], or based on investigator-determined categories[36]. One study used a different method to calculate scores (ie subtracting the points of reversed statements from direct statements, which were valued at 1, 2, 3 and 20, and then added to a constant of 50[36]).

The HADS Anxiety subscale has a range of 0 to 21 and a validated anxiety threshold of 11[73]. One study reported a range of 0 to 14[38], one study reported anxiety categories rather than a threshold[60], two studies reported an anxiety threshold of 8[41, 43] and one study reported an anxiety threshold of 10 (though there was overlap the 'tendency to anxiety' and 'anxiety' categories, classified as scores of 8 to 10 and 10 or more, respectively)[47].

The IES was used in its original form[30, 32, 38, 42, 58] or as a variant (IES-6[49]), and was reported as a total score[30, 32, 38, 49] or as Intrusion and Avoidance subscale scores[42, 58]. The two studies using subscale scores reported threshold levels of 20 or 21[42] and 8.5[58]. When using the PCQ, researchers used either the Emotional subscale[18] or the Negative Consequences subscale[24, 29]. The Cancer Worry Scale and the Perceived Stress Scale were used in original[45, 61] or variant[29, 54, 58] forms. The Symptom Checklist-90-Revised score could not be interpreted because the authors did not report a range[31], and a raw score or a transformed score could have been used[74].



**Table 3.** Prevalence and severity of scanxiety

| Author               | Year     | Measurement of scanxiety                                 |                                                 |                                                                   | Results of scanxiety measurement         |                                       |                                                           |
|----------------------|----------|----------------------------------------------------------|-------------------------------------------------|-------------------------------------------------------------------|------------------------------------------|---------------------------------------|-----------------------------------------------------------|
|                      |          | Name of tool                                             | Range of tool (Anxiety threshold <sup>a</sup> ) | Timing of assessment                                              | Prevalence (%)                           | Severity (Mean <sup>b</sup> )         | Pre- & post-scan comparison                               |
| Andolf[15]           | 1990     | Visual analogue scale                                    | 0-100 (NA)                                      | Post-scan: 1-3 years                                              | 81                                       | Median 3.5                            | NA                                                        |
| Bull[16]             | 1991     | HADS: Anxiety subscale                                   | 0-21 (≥11) <sup>c</sup>                         | Pre-scan: specific timing NR                                      | 4.9                                      | 4.97                                  | Less severe post-scan scanxiety, p<0.001                  |
|                      |          |                                                          |                                                 | Post-scan: post-result, specific timing NR                        | 4                                        | 4.43                                  |                                                           |
| Peteet[17]           | 1992     | 10-point Likert scale                                    | 1-10 (NA)                                       | Post-scan: specific timing NR                                     | NR                                       | First scan 5.5, Recent scan 3.5       | NA                                                        |
| Cockburn[18]         | 1994     | PCQ: Emotional subscale                                  | 0-15 (NA)                                       | Pre-scan: day of scan                                             | NR                                       | <2                                    | No difference                                             |
|                      |          |                                                          |                                                 | Post-scan: pre-results, 1-week post-result & at 8 months          | NR                                       | <2                                    |                                                           |
| Ellman[19]           | 1995     | HADS: Anxiety subscale                                   | 0-21 (≥11)                                      | Pre-scan: day of scan                                             | 6                                        | NR                                    | NA                                                        |
| Sutton[20]           | 1995     | STAI: State Anxiety subscale                             | 1-4 (NA)                                        | Pre-scan: at invitation to screening, specific timing NR          | NR                                       | Between 1.65 and 1.95                 | No significant differences scanxiety at any time point    |
|                      |          |                                                          |                                                 | Peri-scan: day of scan                                            | NR                                       |                                       |                                                           |
|                      |          |                                                          |                                                 | Post-scan: 9 months                                               | NR                                       |                                       |                                                           |
|                      |          | STAI: Trait Anxiety subscale                             | 1-4 (NA)                                        | Pre-scan: at invitation to screening, specific timing NR          | NR                                       | Between 1.65 and 1.95                 | No significant differences in scanxiety at any time point |
|                      |          |                                                          |                                                 | Peri-scan: day of scan                                            | NR                                       |                                       |                                                           |
|                      |          |                                                          |                                                 | Post-scan: 9 months                                               | NR                                       |                                       |                                                           |
|                      |          | GHQ: Anxiety subscale                                    | 0-3 (NA)                                        | Pre-scan: at invitation to screening, specific timing NR          | NR                                       | <1                                    | Less severe post-scan scanxiety, p<0.001                  |
|                      |          |                                                          |                                                 | Post-scan: 9 months                                               | NR                                       |                                       |                                                           |
| 3-point Likert scale | 1-3 (NA) | Pre-scan: at invitation to screening, specific timing NR | NR                                              | <2                                                                | Less severe post-scan scanxiety, p<0.001 |                                       |                                                           |
|                      |          | Post-scan: 9 months                                      | NR                                              |                                                                   |                                          |                                       |                                                           |
| Bakker[21]           | 1998     | 5-point Likert scale                                     | Descriptive range (NA)                          | Post-scan: immediate & at 3 weeks                                 | 39-40                                    | Somewhat, very or extremely: 9 to 15% | NA                                                        |
| Gupta[22]            | 1999     | HSLC-25                                                  | 0-3 (NA)                                        | Post-scan: specific timing NR                                     | 40                                       | Moderate to severe: 25%               | NA                                                        |
| Hafslund[23]         | 2000     | STAI: State Anxiety subscale                             | 20-80 (NA)                                      | Pre-scan: day of scan                                             | NR                                       | 35.5                                  | No statistical comparison reported                        |
|                      |          |                                                          |                                                 | Post-scan: day of scan                                            | NR                                       | 32.1                                  |                                                           |
|                      |          | STAI: Trait Anxiety subscale                             | 20-80 (NA)                                      | Pre-scan: day of scan                                             | NR                                       | 35.9                                  | No statistical comparison reported                        |
|                      |          |                                                          |                                                 | Post-scan: day of scan                                            | NR                                       | NR                                    |                                                           |
| Meystre-Agostoni[24] | 2001     | PCQ: Negative consequences subscale                      | 0-36 (NA)                                       | Pre-scan: day of scan                                             | NR                                       | <1                                    | No statistical comparison reported                        |
|                      |          |                                                          |                                                 | Post-scan: pre- result, 2 weeks post-result & 8 weeks post-result | NR                                       | <2                                    |                                                           |
|                      |          | 6-point Likert scale                                     | 0-5 (NA)                                        | Pre-scan: immediate                                               | 26                                       | <1                                    |                                                           |
|                      |          |                                                          |                                                 | Post-scan: pre-result, 2 weeks post-result & 8 weeks post-result  | NR                                       | <1                                    |                                                           |

|                   |      |                                                 |                        |                                                        |                               |                                                     |                                                                                    |
|-------------------|------|-------------------------------------------------|------------------------|--------------------------------------------------------|-------------------------------|-----------------------------------------------------|------------------------------------------------------------------------------------|
| Drossaert[25]     | 2002 | Composite 7-item score of 4-point Likert scales | 1-4 (NA)               | Baseline: 8 weeks post-first scan                      | NR                            | 1.6                                                 | No statistical comparison reported                                                 |
|                   |      |                                                 |                        | Pre-scan: 6 weeks (second & third scans)               | NR                            | 1.6 to 1.7                                          |                                                                                    |
|                   |      |                                                 |                        | Post-scan: 6 weeks (second & third scans)              | NR                            | 1.5                                                 |                                                                                    |
|                   |      |                                                 | Descriptive range (NA) | Baseline: 8 weeks post-first scan                      | NR                            | Moderate to severe: 10%                             | NA                                                                                 |
| Sandin[26]        | 2002 | HSCL-90-R: Anxiety subscale                     | 0-4 (NA)               | Pre-scan: day of scan                                  | NR                            | 0.41                                                | No statistical comparison reported                                                 |
|                   |      |                                                 |                        | Post-scan: 2 weeks                                     | NR                            | 0.28                                                |                                                                                    |
| Brunton[27]       | 2005 | 4-point Likert scale, 3 items                   | Descriptive range (NA) | Post-scan: within 4 years                              | 56-77                         | Quite or very: 11 to 28%                            | NA                                                                                 |
| Geurts[28]        | 2006 | 4-point Likert scale                            | 1-4 (NA)               | Peri-scan: specific timing NR                          | 61                            | Moderate to severe: 21%                             | NA                                                                                 |
| Tyndel[29]        | 2007 | PCQ: Negative consequences subscale             | 0-36 (NA)              | Pre-scan: 1 month                                      | NR                            | 5.1                                                 | Less severe post-scan scanxiety, p=0.000                                           |
|                   |      |                                                 |                        | Post-scan: 1-month post- result & 6-months post-result | NR                            | 3.8 to 4.2                                          |                                                                                    |
|                   |      | Cancer Worry Scale - Revised                    | 6-24 (NA)              | Pre-scan: 1 month                                      | NR                            | 11.0                                                | Less severe post-scan scanxiety, p=0.000                                           |
|                   |      |                                                 |                        | Post-scan: 1-month post- result & 6-months post-result | NR                            | 10.1 to 10.6                                        |                                                                                    |
| Bunge[30]         | 2008 | IES in low affective risk people                | 0-75 (NA)              | Pre-scan: 1 day                                        | NR                            | 5.6                                                 | Less severe post-scan scanxiety in both low and high affective risk groups, p<0.05 |
|                   |      |                                                 |                        | Post-scan: 6 months                                    | NR                            | 4.3                                                 |                                                                                    |
|                   |      | IES in high affective risk people               | 0-75 (NA)              | Pre-scan: 1 day                                        | NR                            | 14.7                                                |                                                                                    |
|                   |      |                                                 |                        | Post-scan: 6 months                                    | NR                            | 10.3                                                |                                                                                    |
| Brown Sofair[31]  | 2008 | Penn State Worry Questionnaire                  | 16-80 (60)             | Pre-scan: within 1 month                               | NR                            | 50.18                                               | No statistical comparison reported                                                 |
|                   |      |                                                 |                        | Post-scan: day of scan (post-result)                   | NR                            | NR                                                  |                                                                                    |
|                   |      | SCL-90-R: Anxiety subscale                      | NR (NA)                | Pre-scan: within 1 month                               | NR                            | 48.75                                               | No difference                                                                      |
|                   |      |                                                 |                        | Post-scan: day of scan (post-result)                   | NR                            | 42.07                                               |                                                                                    |
|                   |      | Individualized Questionnaire: Anxiety response  | 1-3 (2)                | Pre-scan: within 1 month                               | 35                            | NR                                                  | No statistical comparison reported                                                 |
|                   |      |                                                 |                        | Post-scan: day of scan (post-result)                   | 24                            | NR                                                  |                                                                                    |
| van den Bergh[32] | 2008 | STAI-6                                          | 20-80 (NA)             | Pre-scan: 1 day                                        | NR                            | 34.1                                                | Less severe post-scan scanxiety, p<0.01                                            |
|                   |      |                                                 |                        | Post-scan: within 1 week & at 6 months                 | NR                            | 32.7 to 34.3                                        |                                                                                    |
|                   |      | IES                                             | 0-75 (NA)              | Pre-scan: 1 day                                        | NR                            | 6.9                                                 | Less severe post-scan scanxiety, p<0.01                                            |
|                   |      |                                                 |                        | Post-scan: within 1 week & at 6 months                 | NR                            | 5.1 to 5.6                                          |                                                                                    |
|                   |      | EuroQol questionnaire: Anxiety subscale         | 1-3 (NA)               | Pre-scan: 1 day                                        | 23                            | NR                                                  | No statistical comparison reported                                                 |
|                   |      |                                                 |                        | Post-scan: 6 months                                    | NR                            | NR                                                  |                                                                                    |
| Westerterp[33]    | 2008 | 5-point Likert scale                            | 1-5 (NA)               | Post-scan (after both scans): 2 weeks                  | NR                            | CT 1.2, PET 1.4                                     | NA                                                                                 |
|                   |      |                                                 | Descriptive range (NA) | Post-scan (after both scans): 2 weeks                  | CT 13, PET 23                 | Moderate to severe: CT 4%, PET 10%                  | NA                                                                                 |
| Bastiaannet[34]   | 2009 | 5-point Likert scale                            | 1-5 (NA)               | Post-scan: 2-6 weeks after lymph node dissection       | Chest x-ray 20, CT 31, PET 36 | Moderate to severe: Chest X-ray 13%, CT 5%, PET: 9% | NA                                                                                 |
| Vierikko[35]      | 2009 | Health anxiety inventory                        | 0-24 (NA)              | Pre-scan: specific timing NR                           | NR                            | 6.7                                                 | Less severe post-scan scanxiety, p<0.001                                           |
|                   |      |                                                 |                        | Post-scan: 1 year                                      | NR                            | 5.8                                                 |                                                                                    |
|                   |      | Worry about lung cancer                         | 0-8 (NA)               | Pre-scan: specific timing NR                           | NR                            | 3.0                                                 | No difference                                                                      |

|                  |      |                                    |                                                                   |                                                      |                      |                                          |                                                                          |
|------------------|------|------------------------------------|-------------------------------------------------------------------|------------------------------------------------------|----------------------|------------------------------------------|--------------------------------------------------------------------------|
|                  |      |                                    |                                                                   | Post-scan: 1 year                                    | NR                   | 3.1                                      |                                                                          |
| Bolukbas[36]     | 2010 | STAI: State Anxiety subscale       | 0-NR (20-39 mild, 40-59 moderate, 60-79 severe, ≥ 80 help needed) | Peri-scan: specific timing NR                        | NR                   | 46.2                                     | NA                                                                       |
| Thompson[37]     | 2010 | STAI                               | 40-160 (NA)                                                       | Post-scan: specific timing NR                        | 37                   | 65.8                                     | NA                                                                       |
|                  |      | STAI: State Anxiety subscale       | 20-80 (≥40)                                                       | Post-scan: specific timing NR                        | NR                   | 30.4                                     | NA                                                                       |
|                  |      | STAI: Trait Anxiety subscale       | 20-80 (≥40)                                                       | Post-scan: specific timing NR                        | NR                   | 35.4                                     | NA                                                                       |
| Hutton[38]       | 2011 | HADS: Anxiety subscale             | 0-14 (≥11)                                                        | Baseline: 4 weeks pre-first scan                     | 20                   | 6.9                                      | No difference                                                            |
|                  |      |                                    |                                                                   | Pre-scan: day of each scan (for 5 scans)             | MRI 17, Mammogram 20 | MRI 5.2 to 6.5, Mammogram 5.0 to 6.5     |                                                                          |
|                  |      |                                    |                                                                   | Post-scan: 6 weeks (for 5 scans)                     | 10 to 13             | 5.1 to 5.9                               |                                                                          |
|                  |      | STAI-6                             | 20-80 (NA)                                                        | Pre-scan: day of scan (for 5 scans)                  | NR                   | MRI 10.8 to 12.1, Mammogram 10.1 to 11.3 | Less severe post-scan scanxiety for MRI (p<0.0005) & mammogram (p=0.002) |
|                  |      |                                    |                                                                   | Post-scan: day of scan (for 5 scans)                 | NR                   | MRI 9.6 to 10.7, Mammogram 9.7 to 10.5   |                                                                          |
|                  |      | IES                                | 0-75 (NA)                                                         | Post-scan: 6 weeks (for 5 scans)                     | NR                   | MRI 17.8 to 19.3, Mammogram 17.2 to 18.6 | NA                                                                       |
| Pifarre[39]      | 2011 | STAI                               | 0-60 for each subscale (state more than 10 than trait)            | Pre-scan: day of scan                                | 68                   | NR                                       | NA                                                                       |
| Steinemann[40]   | 2011 | 7-point Likert scale               | 1-7 (NA)                                                          | Pre-scan: day of scan                                | NR                   | 4.1                                      | NA                                                                       |
| Yu[41]           | 2011 | HADS: Anxiety subscale             | 0-21 (≥8)                                                         | Pre-scan: day of scan                                | 38                   | NR                                       | NA                                                                       |
|                  |      | STAI: State Anxiety subscale       | NR-80 (≥40)                                                       | Pre-scan: day of scan                                | 46                   | 39.4                                     | NA                                                                       |
|                  |      | STAI: Trait Anxiety subscale       | NR-80 (≥40)                                                       | Pre-scan: day of scan                                | 46                   | 39.9                                     | NA                                                                       |
|                  |      | Dichotomous reporting <sup>d</sup> | Yes/No (NA)                                                       | Pre-scan: day of scan                                | 41                   | NR                                       | NA                                                                       |
| Bredart[42]      | 2012 | STAI: State Anxiety subscale       | 20-80 (≥46)                                                       | Pre-scan: 1 week                                     | NR                   | MRI 42.1, Mammogram 41.1                 | No statistical comparison reported                                       |
|                  |      |                                    |                                                                   | Post-scan: day of scan & between 15 days to 3 months | NR                   | MRI 34.9, 40.8, Mammogram 34.3, 38.8     |                                                                          |
|                  |      | IES: Intrusion subscale            | 0-35 (≥20)                                                        | Pre-scan: 1 week                                     | NR                   | MRI 8.9, Mammogram 8.4                   | No statistical comparison reported                                       |
|                  |      |                                    |                                                                   | Post-scan: day of scan & between 15 days to 3 months | NR                   | MRI 8.5, Mammogram 7.7                   |                                                                          |
|                  |      | IES: Avoidance subscale            | 0-40 (≥21)                                                        | Pre-scan: 1 week                                     | NR                   | MRI 12.1, Mammogram 9.8                  | No statistical comparison reported                                       |
|                  |      |                                    |                                                                   | Post-scan: day of scan & between 15 days to 3 months | NR                   | MRI 11.8, Mammogram 8.9                  |                                                                          |
| Hafslund[43]     | 2012 | HADS: Anxiety subscale             | 0-21 (≥8)                                                         | Pre-scan: within 2 weeks                             | 15                   | 4.1                                      | NA                                                                       |
| Adams[44]        | 2014 | 4-point Likert scale               | 1-4 (NA)                                                          | Post-scan: day of scan (after each scan)             | NR                   | MRI 1.5, CT 1.8                          | NA                                                                       |
| Baena-Canada[45] | 2014 | HADS: Anxiety subscale             | 0-21 (≥11)                                                        | Post-scan: specific timing NR                        | 4                    | 1.86                                     | NA                                                                       |
|                  |      | Cancer Worry Scale                 | 6-24 (NA)                                                         | Post-scan: specific timing NR                        | NR                   | 9.4                                      | NA                                                                       |

|                |           |                                        |                        |                                                          |                                           |                                                  |                                                                           |
|----------------|-----------|----------------------------------------|------------------------|----------------------------------------------------------|-------------------------------------------|--------------------------------------------------|---------------------------------------------------------------------------|
| Andersson[46]  | 2015      | Sum of 3 items on 5-point Likert scale | 0-12 (NA)              | Post-scan: within four weeks                             | NR                                        | 4                                                | NA                                                                        |
| Elboga[47]     | 2015      | HADS: Anxiety subscale                 | 0-21 (≥10)             | Pre-scan: day of scan                                    | NR                                        | 9.2                                              | NA                                                                        |
|                |           | STAI: State Anxiety subscale           | NR (NA)                | Pre-scan: day of scan                                    | NR                                        | 40.4                                             | NA                                                                        |
|                |           | STAI: Trait Anxiety subscale           | NR (NA)                | Pre-scan: day of scan                                    | NR                                        | 46.6                                             | NA                                                                        |
| Hobbs[48]      | 2015      | 5-point Likert scale                   | 1-5 (NA)               | Post-scan (after both scans), specific timing NR         | Mammogram 17, MRI 44                      | NR                                               | NA                                                                        |
| Baum[49]       | 2016      | IES-6                                  | 0-24 (NA)              | Post-scan: specific timing NR                            | 83                                        | 6.4                                              | NA                                                                        |
| Abreu[50]      | 2017      | 10-point Likert scale                  | 1-10 (NA)              | Pre-scan: day of scan                                    | NR                                        | 6.4                                              | Less severe post-scan scanxiety, p=0.000                                  |
|                |           |                                        |                        | Post-scan: day of scan                                   | NR                                        | 5.7                                              |                                                                           |
| Grilo[51]      | 2017      | STAI: State Anxiety subscale           | 0-60 (NA)              | Pre-scan: day of scan                                    | NR                                        | 31.1                                             | More severe post-scan scanxiety, p=0.000                                  |
|                |           |                                        |                        | Post-scan: day of scan                                   | NR                                        | 33.0                                             |                                                                           |
| Evans[52]      | 2018      | GHQ-12                                 | 0-12 (≥4)              | Peri-scans: specific timing NR                           | 42                                        | NR                                               | NA                                                                        |
|                |           | 7-point Likert scale                   | 1-7 (NA)               | Post-scan: 1 month                                       | NR                                        | MRI 2.5, CT or PET/CT 2.2                        | NA                                                                        |
| Goense[53]     | 2018      | 5-point Likert scale                   | 1-5 (NA)               | Post-scan (after both scans): day of scan                | NR                                        | MRI 1.0, PET 1.0                                 | NA                                                                        |
| Hall[54]       | 2018      | Generalized Anxiety Disorder 2-item    | 0-6 (≥3)               | Peri-scan: specific timing NR                            | 26                                        | 1.62                                             | NA                                                                        |
|                |           | Perceived Stress Scale 4               | 0-16 (NA)              | Peri-scan: specific timing NR                            | NR                                        | 5.14                                             | NA                                                                        |
| Derry[55]      | 2019      | 4-point Likert scale                   | Descriptive range (NA) | Peri-scan: pre-result                                    | NR                                        | 'A great deal' or 'completely': 23%              | NA                                                                        |
| Soriano[56]    | 2019      | PROMIS Anxiety Short Form              | 1-5 (NA)               | Pre-scan: two weeks                                      | NR                                        | 1.55                                             | NA                                                                        |
| Taghizadeh[57] | 2019      | STAI: State Anxiety subscale           | NR (39)                | Baseline                                                 | NR                                        | 30.9                                             | More severe post-scan scanxiety, p<0.001                                  |
|                |           |                                        |                        | Post-scan: one-month post-result & at 12 months          | NR                                        | 33.1, 31.7                                       |                                                                           |
| Bancroft[58]   | 2020      | HADS: Anxiety subscale                 | 0-21 (11)              | Baseline                                                 | Carriers <sup>a</sup> : 14<br>Controls: 7 | Carriers: 6.2<br>Controls: 4.9                   | No difference in prevalence<br>Less severe post-scan in carriers (p=0.04) |
|                |           |                                        |                        | Post-scan: pre-results, at 12 weeks, 26 weeks & 52 weeks | Carriers: 5 to 14<br>Controls: 2 to 7     | Carriers: 5.3 to 5.9<br>Controls: 4.1 to 4.6     |                                                                           |
|                |           | Cancer Worry Scale – Revised           | 8-32 (NA)              | Baseline                                                 | NR                                        | Carriers: 14.4<br>Controls: 12.2                 | No difference                                                             |
|                |           |                                        |                        | Post-scan: at 12 weeks, 26 weeks & 52 weeks              | NR                                        | Carriers: 13.6 to 14.7<br>Controls: 11.9 to 12.1 |                                                                           |
|                |           | IES-cancer: Intrusion subscale         | 0-35 (8.5)             | Post-scan: pre-results, at 12 weeks, 26 weeks & 52 weeks | Carriers: 35 to 58<br>Controls: 5 to 13   | Carriers: 8.3 to 11.4<br>Controls: 1.7 to 3.0    | NA                                                                        |
|                |           | IES-cancer: Avoidance subscale         | 0-40 (8.5)             | Post-scan: pre-results, at 12 weeks, 26 weeks & 52 weeks | Carriers: 55 to 64<br>Controls: 12 to 37  | Carriers: 9.9 to 13.3<br>Controls: 2.6 to 7.0    | NA                                                                        |
|                |           | IES-MRI: Intrusion subscale            | 0-35 (8.5)             | Post-scan: at 12 weeks, 26 weeks & 52 weeks              | Carriers: 4 to 7<br>Controls: 0 to 3      | Carriers: 1.2 to 3.1<br>Controls: 0.1 to 0.5     | NA                                                                        |
|                |           | IES-MRI: Avoidance subscale            | 0-40 (8.5)             | Post-scan: at 12 weeks, 26 weeks & 52 weeks              | Carriers: 14<br>Controls: 8               | Carriers: 1.8<br>Controls: 2.8                   | NA                                                                        |
| STAI-6         | 6-24 (NA) | Pre-scan: day of scan                  | NR                     | Carriers: 7.2<br>Controls: 7.3                           | NA                                        |                                                  |                                                                           |

|              |      |                              |                                                        |                                                          |    |                                               |                                                                                |
|--------------|------|------------------------------|--------------------------------------------------------|----------------------------------------------------------|----|-----------------------------------------------|--------------------------------------------------------------------------------|
|              |      | Health Questionnaire         | 0-14 (NA)                                              | Baseline                                                 | NR | Carriers: 7.0<br>Controls: 6.8                | No difference                                                                  |
|              |      |                              |                                                        | Post-scan: pre-results, at 12 weeks, 26 weeks & 52 weeks | NR | Carriers: 7.1 to 8.1<br>Controls: 6.9, to 7.7 |                                                                                |
| Grilo[59]    | 2020 | STAI: State Anxiety subscale | 20-80 (NA)                                             | Pre-scan: day of scan                                    | NR | Bone scan: 51.75<br>PET/CT: 44.76             | Less severe post-scan scanxiety for both: Bone scan. p=0.02<br>PET/CT, p<0.001 |
|              |      |                              |                                                        | Post-scan: day of scan                                   | NR | Bone scan: 36.70<br>PET/CT: 38.82             |                                                                                |
| Morreale[60] | 2020 | Distress thermometer         | 0-10 (4)                                               | Peri-scan: day of scan                                   | NR | 3.73                                          | No statistical comparison                                                      |
|              |      |                              |                                                        | Post-scan: one-week post-result                          | NR | 3.91                                          |                                                                                |
|              |      | HADS: Anxiety subscale       | 0-21 (0-7 none, 8-10 mild, 11-14 moderate, 15-21 high) | Peri-scan: day of scan                                   | NR | 6.12                                          | No statistical comparison                                                      |
|              |      |                              |                                                        | Post-scan: one-week post-result                          | NR | 5.32                                          |                                                                                |
| Paiella[61]  | 2020 | Perceived Stress Scale       | 0-40 (15-18 moderate, ≥ 19 high)                       | Post-scan: pre-result                                    | NR | 14.8                                          | NA                                                                             |

NA not applicable, NR not reported, HADS Hospital Anxiety and Depression Scale, PCQ Psychological Consequences Questionnaire, STAI State-Trait Anxiety Inventory, GHQ General Health Questionnaire, HSCL Hopkins Symptom Checklist, IES Impact of Event Scale, SCL-90-R Symptom Checklist-90-Revised, HSCL-90-R Hopkins Symptom Checklist 90-Revised, PROMIS Patient-Reported Outcomes Measurement Information System, CT computed tomography, PET positron emission tomography, MRI magnetic resonance imaging

All percentages were rounded to the nearest whole number

<sup>a</sup>NA is listed as the anxiety threshold when the study did not state a pre-specified threshold. In these cases, the definition of scanxiety prevalence was the percentage of people who reported any degree of anxiety, and the definition of scanxiety severity was at least half the total instrument score

<sup>b</sup>Unless otherwise described

<sup>c</sup>This study did not specify an anxiety threshold; however, the Anxiety subscale of the Hospital Anxiety and Depression Scale has validated thresholds. These thresholds were included in this table

<sup>d</sup>Dichotomous reporting assumed given description of question (self-perception of anxiety) and results “40.5% of the patients considered themselves to be anxious”[41]

<sup>e</sup>This study included participants who were *TP53* mutation carriers, and population controls

### Intervention studies

The ten intervention studies (**Table 4**) used 19 measures of anxiety, with five studies using one measure only[62, 66, 67, 69, 70], and five studies at least two[63-65, 68, 71]. The measures included subscales of the STAI (7 studies), Likert scales (5 studies), a variant of the Psychological Consequences Questionnaire (1 study[68]) and the Crown Crisp Experimental Index (1 study[65]).

Likert scales were varied, with a lower range limit of 0 or 1, and an upper range limit between 5 and 10[62, 63, 69-71]. The STAI was used and reported using one or both subscales[63-65, 67, 68, 71], or as a variant (8-item STAI[66]). There was variation from the usual STAI parameters, with studies using a different range (i.e. not reported[63, 65], 0 to 60[64], or 18 to 32[66]) or pre-specified anxiety thresholds of 40[68] or 16[66].

### Scanxiety outcomes

Prevalence and severity of scanxiety for each study are provided in **Table 3**. Summary statistics for prevalence and severity were not calculated due to heterogeneity in the type and timing of measurement between the studies.

#### Prevalence of scanxiety

Twenty-four of the 47 studies reported the prevalence of scanxiety. The prevalence of scanxiety ranged between 0% and 64% across the 16 measures with pre-specified anxiety thresholds[16, 19, 31, 38, 41, 43, 45, 52, 54, 58], though eight of these measures came from only two studies[41, 58]. The prevalence of scanxiety ranged between 13% and 83% using the 14 measures without pre-specified anxiety thresholds[15, 21, 22, 24, 27, 28, 32-34, 37, 39, 41, 48, 49].

There were insufficient numbers to compare the prevalence of scanxiety using measures with pre-specified anxiety thresholds of people having scans for screening (11 measures[16, 31, 38, 43, 45, 54, 58]), reasons other than screening (four measures[41, 52]) and for screening or non-screening reasons (1 measure[19]). When no threshold was reported, the prevalence of scanxiety had a similar range (screening 23% to 81%, five measures[15, 21, 24, 27, 32]; reasons other than screening 14% to 83%, eight measures[28, 33, 34, 37, 39, 41, 48, 49]; either screening or reasons other than screening (40%, one measure[22]).

#### Severity of scanxiety

Severity of scanxiety was reported in 44 of 47 observational studies. Mean severity scores appeared low in almost all measures which quantitatively measured scanxiety (54/62, 87%).

**Table 4.** Effect of interventions to reducing scanxiety

| First author                 | Year      | Intervention                                                                                                                                                                                                           | Measurement of scanxiety       |                                   |                                                                                   | Impact of intervention on scanxiety                            |                                         |                                             |       |
|------------------------------|-----------|------------------------------------------------------------------------------------------------------------------------------------------------------------------------------------------------------------------------|--------------------------------|-----------------------------------|-----------------------------------------------------------------------------------|----------------------------------------------------------------|-----------------------------------------|---------------------------------------------|-------|
|                              |           |                                                                                                                                                                                                                        | Name of tool                   | Range of tool (Anxiety threshold) | Timing of assessment                                                              | Description of results                                         | P-value                                 |                                             |       |
| Mainiero[62]                 | 2001      | Arm A: an educational video about breast cancer and mammography<br>Arm B: an entertaining movie (from the 1940s to 1960s)                                                                                              | 6-point Likert score           | 0-5 (NA)                          | Pre-scan: immediate<br>Post-scan: immediate                                       | No difference                                                  | NR                                      |                                             |       |
| Domar[63]                    | 2005      | Arm A: relaxation audiotape, or;<br>Arm B: music audiotape, or;<br>Arm C: control (blank audiotape)                                                                                                                    | STAI: State Anxiety subscale   | NR (NA)                           | Pre-scan: immediate                                                               | No difference<br>Arm A v Arm B v Arm C: 34.8 v 33.6 v 33.2     | 0.18                                    |                                             |       |
|                              |           |                                                                                                                                                                                                                        |                                |                                   | Post-scan: immediate                                                              | No difference<br>Arm A v Arm B v Arm C: 30.4 v 30.9 v 33.2     | 0.78                                    |                                             |       |
|                              |           |                                                                                                                                                                                                                        | STAI: Trait Anxiety subscale   | NR (NA)                           | Pre-scan: immediate                                                               | No difference<br>Arm A v Arm B v Arm C: 32.6 v 32.7 v 32.5     | 0.99                                    |                                             |       |
|                              |           |                                                                                                                                                                                                                        | 11-point Likert scale          | 1-10 (NA)                         | Post-scan                                                                         | No difference<br>Arm A v Arm B v Arm C: 2.6 v 3.2 v 2.8        | 0.43                                    |                                             |       |
|                              |           |                                                                                                                                                                                                                        | Post-scan: immediate           | NR                                | NR                                                                                |                                                                |                                         |                                             |       |
| Fernandez-Feito[64]          | 2005      | Arm A: A protocolised nursing intervention (information and emotional support) and usual care, or;<br>Arm B: Usual care alone                                                                                          | STAI: State Anxiety subscale   | 0-60 (NA)                         | Pre-scan: immediate (post-intervention)                                           | Less severe                                                    | <0.001                                  |                                             |       |
|                              |           |                                                                                                                                                                                                                        |                                |                                   |                                                                                   | Less severe if fear of cancer present                          | 0.002                                   |                                             |       |
|                              |           |                                                                                                                                                                                                                        |                                |                                   |                                                                                   | Less severe if no fear of cancer present                       | 0.003                                   |                                             |       |
|                              |           |                                                                                                                                                                                                                        |                                |                                   |                                                                                   | No difference if fear of cancer outcome present                | 0.09                                    |                                             |       |
|                              |           |                                                                                                                                                                                                                        |                                |                                   |                                                                                   | Less severe if no fear of scan outcome                         | <0.001                                  |                                             |       |
| STAI: Trait Anxiety subscale | 0-60 (NA) | Pre-scan: immediate (post-intervention)                                                                                                                                                                                | No difference                  | 0.34                              |                                                                                   |                                                                |                                         |                                             |       |
| Caruso[65]                   | 2006      | Arm A: routine information and 45 minutes of informative-emotive psychological support with a psychologist, or;<br>Arm B: routine information                                                                          | Crown Crisp Experimental Index | NR (0-96)                         | Pre-scan: immediate (post-intervention)                                           | Less severe<br>Arm A v Arm B: 39.4 v 42.3                      | 0.03                                    |                                             |       |
|                              |           |                                                                                                                                                                                                                        |                                |                                   | STAI: State Anxiety subscale                                                      | NR (NA)                                                        | Pre-scan: immediate (post-intervention) | No difference<br>Arm A v Arm B: 57.7 v 58.6 | 0.77  |
|                              |           |                                                                                                                                                                                                                        |                                |                                   | STAI: Trait Anxiety subscale                                                      | NR (NA)                                                        | Post-scan: immediate                    | Less severe                                 | 0.048 |
| Vogel[66]                    | 2012      | Arm A: Uptake room with an audio-visual installation involving a video of nature scenes on a 119cm television, dynamic lighting & ambient electronic music<br>Arm B: Uptake room without the audio-visual installation | 8-item STAI                    | 18-32 (≥16)                       | Pre-scan: immediately before & immediately after fluorodeoxyglucose uptake period | Less severe<br>Arm A v Arm B: reduction by 2.39 v 1.02         | 0.04                                    |                                             |       |
|                              |           |                                                                                                                                                                                                                        |                                |                                   |                                                                                   | Pre-scan: immediate (post-intervention)                        | NR                                      | NR                                          |       |
| Acuff[67]                    | 2014      | Arm A: Receive a hand-held device to contact imaging staff during the scan<br>Arm B: No device                                                                                                                         | STAI: State Anxiety subscale   | 20-80 (NA)                        | During scan: immediately before completion of the scan                            | Less severe<br>Arm A v Arm B: 22.87 v 26.45                    | 0.014                                   |                                             |       |
|                              |           |                                                                                                                                                                                                                        |                                |                                   |                                                                                   | Less severe if previous PET/CT<br>Arm A v Arm B: 20.78 v 24.64 | 0.023                                   |                                             |       |

|              |      |                                                                                                                                       |                                               |             |                                                                                    |                                                                             |              |
|--------------|------|---------------------------------------------------------------------------------------------------------------------------------------|-----------------------------------------------|-------------|------------------------------------------------------------------------------------|-----------------------------------------------------------------------------|--------------|
|              |      |                                                                                                                                       |                                               |             |                                                                                    | No difference if first time PET/CT<br>Arm A v Arm B: 23.09 v 27.25, p=0.249 | 0.249        |
| Raz[68]      | 2014 | Arm A: multimedia education session and usual care, or;<br>Arm B: Usual care                                                          | STAI: State Anxiety subscale                  | 20-80 (≥40) | Pre-scan: within 2 weeks<br>Post-scan: immediate, at 1 week & 3-7 months post-scan | No difference at any time point                                             | NR           |
|              |      |                                                                                                                                       | STAI: Trait Anxiety subscale                  | 20-80 (≥40) |                                                                                    | No difference at any time point                                             | NR           |
|              |      |                                                                                                                                       | PCQ: Lung Cancer adaptation, Anxiety subscale | 0-18 (NR)   |                                                                                    | No difference at any time point                                             | 0.11 to 0.76 |
| Zavotsky[69] | 2014 | Arm A: music of their choice played via dock during the scan<br>Arm B: no music                                                       | 11-point Likert scale                         | 0-10 (NA)   | Post-scan: immediate                                                               | No difference<br>Arm A v Arm B: 2.36 v 2.98                                 | 0.21         |
| Ashton[70]   | 2019 | All participants: 10-minute shoulder & neck massage and/or hand massage before, during or after imaging, or between two imaging tests | 11-point Likert scale                         | 0-10 (NA)   | Post-intervention (pre- or post- scan)                                             | 81% had a reduction in anxiety following massage <sup>a</sup>               | <0.01        |
| Lorca[71]    | 2019 | Arm A: mindfulness meditation<br>Arm B: routine care                                                                                  | STAI: State Anxiety subscale                  | NR (NA)     | Post-scan: immediate                                                               | Less severe<br>Arm A v Arm B: 10.47 v 29.07                                 | 0.000        |
|              |      |                                                                                                                                       | STAI: Trait Anxiety subscale                  | NR (NA)     |                                                                                    | No difference                                                               | NS           |
|              |      |                                                                                                                                       | 11-item Likert scale                          | 0-10 (NA)   |                                                                                    | Less severe<br>Arm A v Arm B, 1.07 v 5.70                                   | 0.000        |

NA not applicable, NR not reported, STAI State-Trait Anxiety Inventory, PCQ Psychological Consequences Questionnaire

<sup>a</sup>Mean scores for overall study population not provided

Peer review only

1  
2  
3  
4  
5  
6  
7  
8  
9  
10  
11  
12  
13  
14  
15  
16  
17  
18  
19  
20  
21  
22  
23  
24  
25  
26  
27  
28  
29  
30  
31  
32  
33  
34  
35  
36  
37  
38  
39  
40  
41  
42  
43  
44  
45  
46  
47



The mean severity scores were below pre-specified anxiety thresholds on 17 of the 19 measures where a threshold was reported[16, 31, 37, 38, 41-43, 45, 47, 54, 57, 58]. The two exceptions were observed in a study comparing people with *TP53* mutations ('carriers') to controls, with all participants undergoing screening scans. In carriers, mean scores were maximally 11.4 (IES Intrusion subscale, threshold 8.5), and 13.3 (IES Avoidance subscale, threshold 8.5). Mean severity scores for controls were below the thresholds[58].

Of the 43 measures without a pre-specified threshold, the majority had mean scores that were less than half the total scores[15, 18, 20, 23-26, 29, 30, 32, 33, 35, 37, 38, 44-46, 49, 52-54, 56, 58, 60, 61]. There were six exceptions, which reported maximal mean severity scores of: 5.5 out of 10 (Likert scale)[17]; 6.4 out of 10 (Likert scale)[50]; 4.1 out of 7 (Likert scale)[40], 33 out of 60 (STAI State Anxiety subscale)[51], 8.1 out of 14 (Health Questionnaire)[58], and; 51.75 out of 80 (STAI)[59]. Four of these scores occurred in studies where scans were performed for reasons other than screening[17, 50, 51, 59], one allowed scans for diagnosis or screening[40], and one allowed scans for screening only[58].

Eight measures used a descriptive range of severity, with more severe levels of scanxiety in 4% to 28% of participants[21, 22, 25, 27, 28, 33, 34, 55].

Four measures could not be interpreted because they failed to report a range and anxiety threshold[31, 36, 47].

### Scanxiety before and after a scan

Of the 20 studies that reported a pre- and post-scan scanxiety measurement, 14 studies reported a statistical comparison[16, 18, 20, 29-32, 35, 38, 50, 51, 57-59] and six did not[23-26, 42, 60](**Table 3**). There was variation in the timing of scanxiety measurement before a scan from four weeks before the scan until immediately before the scan, and after a scan from immediately after the scan until one year after the scan. Five studies reported a post-scan reduction in scanxiety severity compared to pre-scan levels[16, 29, 30, 32, 50, 59]. Two studies reported an increase in post-scan scanxiety severity[51, 57], and two studies no difference in pre- and post-scan scanxiety severity[18, 31].

Four studies reported mixed findings on the change in scanxiety severity across different measures (**Table 5**).

**Table 5.** Studies with discrepant results on pre- and post-scan scanxiety severity using different measures

| First author | Measurement tool                                                       |                                                              |
|--------------|------------------------------------------------------------------------|--------------------------------------------------------------|
|              | Post-scan reduction in scanxiety                                       | No difference in pre- or post-scan scanxiety                 |
| Sutton[20]   | General Health Questionnaire: Anxiety subscale<br>3-point Likert scale | STAI: State Anxiety subscale<br>STAI: Trait Anxiety subscale |
| Vierikko[35] | Health Anxiety Inventory                                               | Worry about lung cancer                                      |
| Hutton[38]   | 6-item STAI                                                            | HADS: Anxiety subscale                                       |
| Bancroft[58] | HADS: Anxiety subscale                                                 | Cancer Worry Scale – Revised<br>Health Questionnaire         |

STAI: State Trait Anxiety Inventory, HADS: Hospital Anxiety and Depression Scale

Although Bancroft *et al.*[58] reported a reduction in scanxiety severity using HADS (anxiety subscale), there was no difference in scanxiety prevalence.

### Contributing factors to scanxiety

Multiple comparisons were made between scanxiety and possible contributing factors across the included studies (Table 6).

**Table 6.** Contributing factors to scanxiety

| Variable               | Comparison                                                | Effect on scanxiety         | Studies | n      | P-value <sup>a</sup>                                                                  |
|------------------------|-----------------------------------------------------------|-----------------------------|---------|--------|---------------------------------------------------------------------------------------|
| Age                    | Younger v older                                           | More prevalent              | 1       | 398    | 0.008[41]                                                                             |
|                        |                                                           | No difference in prevalence | 2       | 338    | NS[28, 50]                                                                            |
|                        |                                                           | More severe                 | 5       | 1883   | 0.005[45], <0.01[20], <0.01 (for screening)[70], 0.01[24], NR[63]                     |
|                        |                                                           | No difference in severity   | 11      | 6804   | NS[22, 27, 36, 37, 42, 43, 49, 51, 59, 62], NS (for surveillance)[70]                 |
| Gender                 | Men v women                                               | More prevalent              | 1       | 200    | <0.001[39]                                                                            |
|                        |                                                           | Less prevalent              | 1       | 298    | 0.021[41]                                                                             |
|                        |                                                           | No difference in prevalence | 1       | 106    | NS[28]                                                                                |
|                        |                                                           | More severe                 | 1       | 232    | 0.033 (post-scan)[50]                                                                 |
|                        |                                                           | Less severe                 | 2       | 1381   | 0.000[47], <0.05[57]                                                                  |
|                        |                                                           | No difference in severity   | 5       | 580    | NS[37, 49, 51, 59], NS (pre-scan)[50]                                                 |
| Ethnicity              | White v other races                                       | More severe                 | 1       | 143    | NR[63]                                                                                |
|                        | Maori & Pacific Islanders v New Zealand European or Asian | More severe                 | 1       | 584    | <0.001[27]                                                                            |
|                        | Any                                                       | No difference in severity   | 5       | 1454   | NS[22, 24, 37, 40, 49]                                                                |
| Education              | Lower v higher                                            | More prevalent              | 1       | 398    | <0.001[41]                                                                            |
|                        |                                                           | No difference in prevalence | 2       | 338    | NS[28, 50]                                                                            |
|                        |                                                           | More severe                 | 8       | 7400   | 0.003[62], 0.007[36], <0.01[22], ≤0.01[42], 0.012[24], 0.018[27], 0.04[43], <0.05[23] |
|                        |                                                           | No difference in severity   | 6       | 591    | NS[37, 49, 51, 59, 63, 69]                                                            |
| Employment             | Unemployed v employed                                     | More prevalent              | 1       | 398    | 0.046[41]                                                                             |
|                        |                                                           | More severe                 | 3       | 5056   | 0.01[43], 0.05[23], ≤0.05[42]                                                         |
|                        |                                                           | No difference in severity   | 2       | 654    | NS[27, 37]                                                                            |
| Income                 | Higher v lower                                            | No difference in severity   | 3       | 757    | NS[27, 37, 49]                                                                        |
| Marital status         | Married or de facto v single                              | More severe                 | 1       | 637    | ≤0.01 (using IES - Intrusion subscale)[42]                                            |
|                        |                                                           | No difference in severity   | 5       | 1790   | NS[24, 36, 37, 49], NS (using STAI - State anxiety subscale)[42]                      |
| Children               | Children v no children                                    | No difference in severity   | 3       | 5206   | NS[24, 37, 43]                                                                        |
| Smoking status         | Current v non-smoking <sup>b</sup>                        | More severe                 | 3       | 4562   | <0.001[43, 54], 0.031[47]                                                             |
|                        |                                                           | No difference in severity   | 2       | 330    | NS[40, 49]                                                                            |
| Reason for scan        | Diagnostic v screening                                    | More severe                 | 3       | 1104   | 0.007[41], 0.047[36], NR[62]                                                          |
|                        | Staging or surveillance v monitoring                      | More severe                 | 1       | 200    | <0.001[39]                                                                            |
|                        | Lower v higher referral clarity                           | More severe                 | 1       | 169    | 0.048[54]                                                                             |
| Type of scan           | MRI v mammogram                                           | More severe                 | 1       | 49     | 0.009[48]                                                                             |
|                        |                                                           | Less severe                 | 1       | 637    | NR[42]                                                                                |
|                        | CT v MRI                                                  | More severe                 | 1       | 36     | 0.007[44]                                                                             |
|                        |                                                           | Less severe                 | 1       | 115    | NR[52]                                                                                |
|                        | PET v CT                                                  | More severe                 | 1       | 82     | 0.01[33]                                                                              |
|                        | Nuclear medicine scan v non-nuclear medicine scan         | More severe                 | 1       | 398    | 0.004[41]                                                                             |
|                        | MRI v PET/CT                                              | No difference in severity   | 2       | 142    | NS[52, 53]                                                                            |
| CT v PET v chest X-ray | No difference in severity                                 | 1                           | 59      | NS[34] |                                                                                       |

|                          |                                              |                             |   |      |                                                                                                                                                                       |
|--------------------------|----------------------------------------------|-----------------------------|---|------|-----------------------------------------------------------------------------------------------------------------------------------------------------------------------|
|                          | Bone scan v PET scan                         | More severe                 | 1 | 94   | <0.001 (post-scan)[59]                                                                                                                                                |
|                          |                                              | No difference in severity   | 1 | 94   | NS (pre-scan)[59]                                                                                                                                                     |
| Scan-naïve               | First v subsequent scans                     | More prevalent              | 1 | 398  | 0.001[41]                                                                                                                                                             |
|                          |                                              | No difference in prevalence | 1 | 200  | NS[39]                                                                                                                                                                |
|                          |                                              | More severe                 | 5 | 3796 | <0.0005[38], <0.01[25], <0.02[19], <0.05[67], NR[66]                                                                                                                  |
|                          |                                              | Less severe                 | 1 | 93   | 0.038[36]                                                                                                                                                             |
|                          |                                              | No difference in severity   | 6 | 2491 | NS[24, 27, 50, 51, 59, 62]                                                                                                                                            |
| Pain                     | Pain v no pain during scan                   | More severe                 | 6 | 4291 | <0.0001[25], <0.001[27], 0.001[62], <0.01[23, 69] <0.05[22]                                                                                                           |
| Risk of cancer           | Past history v no past history of cancer     | More severe                 | 2 | 864  | ≤0.001[42], <0.05[40]                                                                                                                                                 |
|                          |                                              | Less severe                 | 1 | 434  | 0.013[45]                                                                                                                                                             |
|                          |                                              | No difference in severity   | 3 | 1206 | NS[15, 24, 58]                                                                                                                                                        |
|                          | Family history v no family history of cancer | More severe                 | 1 | 584  | 0.002[27]                                                                                                                                                             |
|                          |                                              | No difference in severity   | 3 | 1255 | NS[15, 24, 36]                                                                                                                                                        |
|                          | Mutation carrier v not a carrier             | More severe                 | 1 | 88   | <0.05 (three comparisons, using IES cancer – Intrusion and Avoidance subscales, and post-scan Health Questionnaire)[58]                                               |
|                          |                                              | No difference               | 1 | 88   | NS (five comparisons, using HADS- Anxiety subscale, Cancer Worry Scale – Revised, IES MRI – Intrusion and Avoidance subscales, and pre-scan Health Questionnaire)[58] |
|                          | Higher, not otherwise specified v lower      | More severe                 | 1 | 70   | <0.05[37]                                                                                                                                                             |
| Perceived risk of cancer | Higher v lower                               | More severe                 | 3 | 1545 | <0.001[27], ≤0.001[42], <0.01[30]                                                                                                                                     |

NS not significant, NR not reported, IES Impact of Event Scale, STAI State Trait Anxiety Inventory, HADS Hospital Anxiety and Depression Scale, MRI Magnetic Resonance Imaging

<sup>a</sup>The P-values listed in this table were reported by individual studies based on their own datasets. This scoping review has not performed additional analysis or attempted quantitative comparisons between studies.

<sup>b</sup>One study compared current smokers v former smokers[54], and one study compared current and former smokers v never smokers[49]

In summary, higher scanxiety severity was associated with people with:

- Lower education (compared to higher education, eight of 14 studies[22-24, 27, 36, 37, 42, 43, 49, 51, 59, 62, 63, 69]);
- A history of smoking (compared to non-smoking, three of five studies[40, 43, 47, 49, 54]);
- Higher pain levels during the scan (compared to no pain, all six studies[22, 23, 25, 27, 62, 69]);
- Higher perceived risk of cancer (compared to lower perceived risk of cancer, all three studies[27, 30, 42]), and;
- Diagnostic scans (compared to screening scans, all three studies[36, 41, 62])

The prevalence or severity of scanxiety was not consistently affected by age (13 of 19 comparisons[20, 22, 24, 27, 28, 36, 37, 41-43, 45, 49-51, 59, 62, 63, 70]), gender (six of 11 comparisons[28, 37, 39, 41, 47, 49-51, 57, 59]), ethnicity (five of seven comparisons[22, 24, 27, 37, 40, 49, 63]), income (all three comparisons[27, 37, 49]), marital status (five of six comparisons[24, 36, 37, 42, 49]) or having children (all three comparisons[24, 37, 43]).

Inconclusive results occurred in the following comparisons:

- Employment (unemployed compared to employed, four of six comparisons[23, 27, 37, 41-43])

- Scan-naivety (first scan compared to subsequent scans, six of 13 comparisons[19, 24, 25, 27, 36, 38, 39, 41, 50, 51, 62, 66, 67])
- Risk of cancer (higher compared to lower risk of cancer, seven of 19 comparisons[15, 24, 27, 36, 37, 40, 42, 45, 58])

Although nine studies reported differences in scanxiety between different imaging modalities, the number of comparisons between specific scans were insufficient to draw conclusions[33, 34, 41, 42, 44, 48, 52, 53, 59].

### Interventions that reduce scanxiety

Five of the 10 intervention studies showed a reduction in scanxiety compared to controls[64-67, 71]. Four studies reported no difference in scanxiety between the intervention arms[62, 63, 68, 69]. The study where all participants received the same intervention showed a reduction in anxiety[70]. Details of these results are listed in **Table 4**.

Both multi-faceted interventions studies incorporating education and emotional or psychological support showed a reduction in scanxiety[64, 65].

Of the six studies with relaxation, distraction and/or meditation components, three studies showed a reduction in scanxiety[66, 70, 71], while three studies did not[62, 63, 69].

Interventions with only educational components did not show a reduction in scanxiety[62, 68].

A reduction in scanxiety severity was also observed when a hand-held device was available to communicate with radiology staff. This reduction was observed in the subgroup of participants who had had a previous scan, but not in participants having their first scan[67].

## DISCUSSION

This is the first systematic scoping review aimed at quantifying the phenomenon of scanxiety in people having cancer-related scans. Scanxiety is a common and important clinical problem, as supported by the large number of studies identified by our search. There is a wide range of reported scanxiety prevalence (0 to 83%), and scanxiety is generally not severe. Severity of scanxiety may be lower after a scan and is higher in people who have a lower education, currently smoke, experience pain during a scan, have higher perceived risk of cancer, and who are having diagnostic (rather than screening) scans. Interventions may be more likely to reduce scanxiety if they involve active participation (eg psychological and emotional support, meditation or a hand-held communication device) rather than passive participation (listening to music or education only).

Firm conclusions about prevalence and severity could not be drawn due to considerable methodological heterogeneity of the included studies, especially in relation to scanxiety measurement tools. None were designed and validated for scanxiety, and some tools and their thresholds were not designed and/or validated for anxiety. This review did use purpose-designed definitions of prevalence and severity to allow some comparison between studies; however, the lack of a universal definition or specific measurement tool for scanxiety limits confidence in the interpretation of the results and interstudy

1  
2  
3 comparisons. This highlights the need for a universally accepted measure to quantify scanxiety and  
4 evaluate scanxiety interventions in the future. A recent literature review by Al-Dibouni[75] provided a  
5 narrative overview of scanxiety in people having scans for any reason, and also recognised the lack of a  
6 specific measurement tool for scanxiety and variable scanxiety prevalence among studies[75].  
7

8  
9 Given the STAI and Likert scales were the most common tools used, we propose that future studies use  
10 the state anxiety subscale of the STAI, with a range of 20-80 and no specific anxiety threshold[72] (or  
11 variants, such as the STAI-6[76]), and/or the distress thermometer, with a range of 0-10 and a clinically  
12 significant threshold of  $\geq 4$ [77], to measure scanxiety. These tools can be combined with other validated  
13 anxiety measures, such as the HADS, to further refine the relationship between tools. Using existing  
14 measures rather than developing a scanxiety specific tool allows scanxiety assessment to occur  
15 immediately and broadly in clinical research.  
16

17  
18 Strengths of this scoping review include the rigorous methodology using a published framework[12, 13],  
19 two independent researchers for study selection and data extraction, and the implementation of a  
20 comprehensive search strategy and broad inclusion criteria to achieve an exhaustive review of the  
21 available literature. Limitations include the use of purpose-designed definitions of prevalence and  
22 severity and the limited generalisability of the results due to heterogeneity in cancer type, reason for  
23 scan, imaging modality and timing of scanxiety measurement between the studies, and because the  
24 search strategy was restricted to English language databases. Finally, scanxiety in people who were  
25 recalled after an abnormal screening result were excluded from this review due to confounding and  
26 feasibility. These populations may be at higher risk of scanxiety, and further research may provide  
27 further insight about the scanxiety experience in this population.  
28  
29

30  
31 Additional research implications of our review include the need for research into high-risk populations  
32 for scanxiety, including people with advanced cancer. This population was included in only three studies  
33 [49, 55, 60]; however, people with cancer have higher rates of anxiety compared to the general  
34 population[78]. As they may be more likely to develop scanxiety, experience more severe scanxiety, or  
35 have higher post-scan scanxiety while waiting for scan results, longitudinal assessment of scanxiety is  
36 required. Further research into effective and feasible interventions is also required, though these will  
37 face implementation challenges due to variations in health systems and available resources.  
38  
39  
40

## 41 CONCLUSIONS

42  
43 Prevalence and severity of scanxiety varied widely, although heterogeneity in scanxiety measurement  
44 interpretation. A uniform approach to evaluating scanxiety will improve understanding of the  
45 phenomenon and help guide the development of interventions to high-risk populations.  
46  
47  
48

## 49 FOOTNOTES

50  
51 **Contributions:** KTB, PB, BK, HD and CB contributed to the concept and design of this review. KTB  
52 developed and implemented the search strategy. KTB and RL independently screened and reviewed  
53 titles, abstracts and full-text articles for inclusion. KTB and RL independently extracted data from the  
54 included studies. PB, BK, HD and CB contributed content expertise to ensure clinically relevant  
55  
56  
57  
58

1  
2  
3 interpretation of the data. KTB drafted the initial manuscript, and RL, PB, BK, HD and CB reviewed and  
4 approved the manuscript prior to submission.

5  
6 **Ethical approval:** This study was not submitted for ethics approval because it is a review article and does  
7 not directly recruit participants.

8  
9 **Competing interests:** None declared

10  
11 **Funding:** This research received no specific grant from any funding agency in the public, commercial or  
12 not-for-profit sectors

13  
14 **Data availability:** All data relevant to the study are included in the article or uploaded as supplementary  
15 information. Data are available upon reasonable request. The additional data are the data extraction  
16 forms for each study.

## 17 18 19 20 21 REFERENCES

- 22 1. Feiler B. Scanxiety. Fear of a postcancer ritual. *Time* 2011;177(24):56
- 23 2. Brandzel S, Erosenberg D, Johnson D, et al. Women's experiences and preferences regarding  
24 breast imaging after completing breast cancer treatment. *Patient Prefer Adherence* 2017;11:199-  
25 204.doi:10.2147/PPA.S122244
- 26 3. Evans R, Taylor S, Janes S, et al. Patient experience and perceived acceptability of whole-body  
27 magnetic resonance imaging for staging colorectal and lung cancer compared with current staging scans:  
28 a qualitative study. *BMJ Open* 2017;7(9):e016391.doi:10.1136/bmjopen-2017-016391
- 29 4. Mathers SA, McKenzie GA, Robertson EM. A necessary evil: The experiences of men with  
30 prostate cancer undergoing imaging procedures. *Radiography* 2011;17(4):284-  
31 91.doi:10.1016/j.radi.2011.06.005
- 32 5. Strand T, Tornqvist E, Rask M, et al. The experience of patients with neoplasm metastasis in the  
33 spine during a magnetic resonance imaging examination. *J Radiol Nurs* 2014;33(4):191-  
34 8.doi:10.1016/j.jradnu.2014.09.001
- 35 6. Truesdale-Kennedy M, Taggart L, McIlpatrick S. Breast cancer knowledge among women with  
36 intellectual disabilities and their experiences of receiving breast mammography. *J Adv Nurs*  
37 2011;67(6):1294-304.doi:10.1111/j.1365-2648.2010.05595.x
- 38 7. Memorial Sloan Kettering. Coping with "Scanxiety" during and after Cancer Treatment 2013.  
39 <https://www.mskcc.org/blog/coping-scanxiety-during-and-after-treatment/> (accessed May 2020).
- 40 8. Dana-Farber Cancer Institute. Scan Anxiety (or 'Scanxiety'): 5 Approaches to Coping 2019.  
41 <https://blog.dana-farber.org/insight/2019/02/5-tips-for-reducing-scanxiety/> (accessed May 2020).
- 42 9. Barter K. Scans + Anxiety = Scanxiety 2019. <https://pinkhope.org.au/scans-anxiety-scanxiety/>  
43 (accessed May 2020).
- 44 10. brainstrust. Scanxiety. [https://brainstrust.org.uk/brain-tumour-support/quality-of-life/living-  
45 well-with-a-brain-tumour/scanxiety/](https://brainstrust.org.uk/brain-tumour-support/quality-of-life/living-well-with-a-brain-tumour/scanxiety/) (accessed May 2020).
- 46 11. Fight Colorectal Cancer. Waiting for Test Results: 5 Tips to Minimize Scanxiety 2019.  
47 <https://fightcolorectalcancer.org/blog/scanxiety/> (accessed May 2020).
- 48 12. Arksey H, O'Malley L. Scoping studies: towards a methodological framework. *Int J Soc Res  
49 Methodol* 2005;8(1):19-32.doi:10.1080/1364557032000119616
- 50 13. Levac D, Colquhoun H, O'Brien KK. Scoping studies: advancing the methodology. *Implement Sci*  
51 2010;5:69.doi:10.1186/1748-5908-5-69

14. Tricco AC, Lillie E, Zarin W, et al. PRISMA Extension for Scoping Reviews (PRISMA-ScR): Checklist and Explanation. *Ann Intern Med* 2018;169(7):467-73.doi:10.7326/M18-0850
15. Andolf E, Jorgensen C, Uddenberg N, et al. Psychological effects of ultrasound screening for ovarian carcinoma. *J Psychosom Obstet Gynaecol* 1990;11(2):155-62.doi:10.3109/01674829009084412
16. Bull AR, Campbell MJ. Assessment of the psychological impact of a breast screening programme. *Br J Radiol* 1991;64(762):510-5.doi:10.1259/0007-1285-64-762-510
17. Peteet JR, Stomper PC, Ross DM, et al. Emotional support for patients with cancer who are undergoing CT: semistructured interviews of patients at a cancer institute. *Radiology* 1992;182(1):99-102.doi:10.1148/radiology.182.1.1727318
18. Cockburn J, Staples M, Hurley SF, et al. Psychological consequences of screening mammography. *J Med Screen* 1994;1(1):7-12.doi:10.1177/096914139400100104
19. Ellman R, Thomas BA. Is psychological wellbeing impaired in long-term survivors of breast cancer? *J Med Screen* 1995;2(1):5-9.doi:10.1177/096914139500200103
20. Sutton S, Saidi G, Bickler G, et al. Does routine screening for breast cancer raise anxiety? Results from a three wave prospective study in England. *J Epidemiol Community Health* 1995;49(4):413-8.doi:10.1136/jech.49.4.413
21. Bakker DA, Lightfoot NE, Steggles S, et al. The experience and satisfaction of women attending breast cancer screening. *Oncol Nurs Forum* 1998;25(1):115-21
22. Gupta R, Nayak MB, Khoursheed M, et al. Emotional distress in women presenting for breast imaging. *Ann Saudi Med* 1999;19(6):511-4.doi:10.5144/0256-4947.1999.511
23. Hafslund B. Mammography and the experience of pain and anxiety. *Radiography* 2000;6(4):269-72.doi:10.1053/radi.2000.0281
24. Meystre-Agustoni G, Paccaud F, Jeannin A, et al. Anxiety in a cohort of Swiss women participating in a mammographic screening programme. *J Med Screen* 2001;8(4):213-9.doi:10.1136/jms.8.4.213
25. Drossaert CH, Boer H, Seydel ER. Monitoring women's experiences during three rounds of breast cancer screening: results from a longitudinal study. *J Med Screen* 2002;9(4):168-75.doi:10.1136/jms.9.4.168
26. Sandin B, Chorot P, Valiente RM, et al. Adverse psychological effects in women attending a second-stage breast cancer screening. *J Psychosom Res* 2002;52(5):303-9.doi:10.1016/s0022-3999(01)00227-6
27. Brunton M, Jordan C, Campbell I. Anxiety before, during, and after participation in a population-based screening mammography programme in Waikato Province, New Zealand. *N Z Med J* 2005;118(1209):U1299
28. Geurts TW, Ackerstaff AH, Van Zandwijk N, et al. The psychological impact of annual chest X-ray follow-up in head and neck cancer. *Acta Otolaryngol* 2006;126(12):1315-20.doi:10.1080/00016480600868414
29. Tyndel S, Austoker J, Henderson BJ, et al. What is the psychological impact of mammographic screening on younger women with a family history of breast cancer? Findings from a prospective cohort study by the PIMMS Management Group. *J Clin Oncol* 2007;25(25):3823-30.doi:10.1200/JCO.2007.11.0437
30. Bunge EM, van den Bergh KA, Essink-Bot ML, et al. High affective risk perception is associated with more lung cancer-specific distress in CT screening for lung cancer. *Lung Cancer* 2008;62(3):385-90.doi:10.1016/j.lungcan.2008.03.029
31. Brown Sofair J, Lehlbach M. The role of anxiety in a mammography screening program. *Psychosomatics* 2008;49(1):49-55.doi:10.1176/appi.psy.49.1.49

- 1  
2  
3 32. van den Bergh KA, Essink-Bot ML, Bunge EM, et al. Impact of computed tomography screening  
4 for lung cancer on participants in a randomized controlled trial (NELSON trial). *Cancer* 2008;113(2):396-  
5 404.doi:dx.doi.org/10.1002/cncr.23590
- 6 33. Westerterp M, van Westreenen HL, Deutekom M, et al. Patients' perception of diagnostic tests  
7 in the preoperative assessment of esophageal cancer. *Patient Prefer Adherence* 2008;2:157-62
- 8 34. Bastiaannet E, Hoekstra-Weebers JE, Francken AB, et al. Perception of burden experienced  
9 during diagnostic tests by melanoma patients with lymph node metastases. *Melanoma Res*  
10 2009;19(1):36-41.doi:10.1097/CMR.0b013e32831993b7
- 11 35. Vierikko T, Kivisto S, Jarvenpaa R, et al. Psychological impact of computed tomography screening  
12 for lung cancer and occupational pulmonary disease among asbestos-exposed workers. *Eur J Cancer*  
13 *Prev* 2009;18(3):203-6.doi:10.1097/cej.0b013e328329d800
- 14 36. Bolukbas N, Erbil N, Kahraman AN. Determination of the anxiety level of women who present for  
15 mammography. *Asian Pac J Cancer Prev* 2010;11(2):495-8
- 16 37. Thompson CA, Charlson ME, Schenkein E, et al. Surveillance CT scans are a source of anxiety and  
17 fear of recurrence in long-term lymphoma survivors. *Ann Oncol* 2010;21(11):2262-  
18 6.doi:10.1093/annonc/mdq215
- 19 38. Hutton J, Walker LG, Gilbert FJ, et al. Psychological impact and acceptability of magnetic  
20 resonance imaging and X-ray mammography: the MARIBS Study. *Br J Cancer* 2011;104(4):578-  
21 86.doi:10.1038/bjc.2011.1
- 22 39. Pifarre P, Simo M, Gispert JD, et al. [Diagnostic imaging studies: do they create anxiety?]. *Rev*  
23 *Esp Med Nucl* 2011;30(6):346-50.doi:dx.doi.org/10.1016/j.remna.2011.03.003
- 24 40. Steinemann SK, Chun MB, Huynh DH, et al. Breast cancer worry among women awaiting  
25 mammography: is it unfounded? Does prior counseling help? *Hawaii Med J* 2011;70(7):149-50
- 26 41. Yu LS, Chojniak R, Borba MA, et al. Prevalence of anxiety in patients awaiting diagnostic  
27 procedures in an oncology center in Brazil. *Psychooncology* 2011;20(11):1242-5.doi:10.1002/pon.1842
- 28 42. Bredart A, Kop JL, Fall M, et al. Anxiety and specific distress in women at intermediate and high  
29 risk of breast cancer before and after surveillance by magnetic resonance imaging and mammography  
30 versus standard mammography. *Psychooncology* 2012;21(11):1185-94.doi:10.1002/pon.2025
- 31 43. Hafslund B, Espehaug B, Nortvedt MW. Health-related quality of life, anxiety and depression  
32 related to mammography screening in Norway. *J Clin Nurs* 2012;21(21-22):3223-34.doi:10.1111/j.1365-  
33 2702.2012.04244.x
- 34 44. Adams HJ, Kwee TC, Vermoolen MA, et al. Whole-body MRI vs. CT for staging lymphoma: patient  
35 experience. *Eur J Radiol* 2014;83(1):163-6.doi:10.1016/j.ejrad.2013.10.008
- 36 45. Baena-Canada JM, Rosado-Varela P, Exposito-Alvarez I, et al. Women's perceptions of breast  
37 cancer screening. Spanish screening programme survey. *Breast* 2014;23(6):883-  
38 8.doi:10.1016/j.breast.2014.09.010
- 39 46. Andersson C, Johansson B, Wassberg C, et al. Patient experience of an 18F-FDG-PET/CT  
40 examination: Need for improvements in patient care. *J Radiol Nurs* 2015;34(2):100-  
41 8.doi:10.1016/j.jradnu.2014.11.008
- 42 47. Elboga U, Elboga G, Can C, et al. Assessment of procedure related anxiety and depression in  
43 oncologic patients before F-18 FDG PET-CT imaging. *J Psychiatry* 2015;18 (1) (no  
44 pagination)(215).doi:10.4172/Psychiatry.1000215
- 45 48. Hobbs MM, Taylor DB, Buzynski S, et al. Contrast-enhanced spectral mammography (CESM) and  
46 contrast enhanced MRI (CEMRI): Patient preferences and tolerance. *J Med Imaging Radiat Oncol*  
47 2015;59(3):300-5.doi:10.1111/1754-9485.12296
- 48 49. Bauml JM, Troxel A, Epperson CN, et al. Scan-associated distress in lung cancer: Quantifying the  
49 impact of "scanxiety". *Lung Cancer* 2016;100:110-3.doi:10.1016/j.lungcan.2016.08.002
- 50  
51  
52  
53  
54  
55  
56  
57  
58



- 1  
2  
3 50. Abreu C, Grilo A, Lucena F, et al. Oncological Patient Anxiety in Imaging Studies: the PET/CT  
4 Example. *J Cancer Educ* 2017;32(4):820-6.doi:10.1007/s13187-016-1069-3
- 5 51. Grilo A, Vieira L, Carolino E, et al. Anxiety in Cancer Patients during (18)F-FDG PET/CT Low Dose:  
6 A Comparison of Anxiety Levels before and after Imaging Studies. *Nurs Res Pract*  
7 2017;2017:3057495.doi:10.1155/2017/3057495
- 8 52. Evans RE, Taylor SA, Beare S, et al. Perceived patient burden and acceptability of whole body  
9 MRI for staging lung and colorectal cancer; comparison with standard staging investigations. *Br J Radiol*  
10 2018;91(1086):20170731.doi:10.1259/bjr.20170731
- 11 53. Goense L, Borggreve AS, Heethuis SE, et al. Patient perspectives on repeated MRI and PET/CT  
12 examinations during neoadjuvant treatment of esophageal cancer. *Br J Radiol*  
13 2018;91(1086):20170710.doi:10.1259/bjr.20170710
- 14 54. Hall DL, Lennes IT, Carr A, et al. Lung Cancer Screening Uncertainty among Patients Undergoing  
15 LDCT. *Am J Health Behav* 2018;42(1):69-76.doi:10.5993/AJHB.42.1.7
- 16 55. Derry HM, Maciejewski PK, Epstein AS, et al. Associations between Anxiety, Poor Prognosis, and  
17 Accurate Understanding of Scan Results among Advanced Cancer Patients. *J Palliat Med* 2019;22(8):961-  
18 5.doi:10.1089/jpm.2018.0624
- 19 56. Soriano EC, Perndorfer C, Siegel SD, et al. Threat sensitivity and fear of cancer recurrence: a daily  
20 diary study of reactivity and recovery as patients and spouses face the first mammogram post-diagnosis.  
21 *J Psychosoc Oncol* 2019;37(2):131-44.doi:10.1080/07347332.2018.1535532
- 22 57. Taghizadeh N, Tremblay A, Cressman S, et al. Health-related quality of life and anxiety in the  
23 PAN-CAN lung cancer screening cohort. *BMJ Open* 2019;9(1):e024719.doi:10.1136/bmjopen-2018-  
24 024719
- 25 58. Bancroft EK, Saya S, Brown E, et al. Psychosocial effects of whole-body MRI screening in adult  
26 high-risk pathogenic TP53 mutation carriers: a case-controlled study (SIGNIFY). *J Med Genet*  
27 2020;57(4):226-36.doi:10.1136/jmedgenet-2019-106407
- 28 59. Grilo AM, Vieira L, Carolino E, et al. Cancer Patient Experience in a Nuclear Medicine  
29 Department: Comparison between Bone Scintigraphy and (18)F-FDG PET/CT. *J Nucl Med Technol*  
30 2020.doi:10.2967/jnmt.119.239285
- 31 60. Morreale MK, Moore TF, Kim S, et al. Preferences for notification of imaging results in patients  
32 with metastatic cancer. *Patient Educ Couns* 2020;103(2):392-7.doi:10.1016/j.pec.2019.08.032
- 33 61. Paiella S, Marinelli V, Secchettin E, et al. The emotional impact of surveillance programs for  
34 pancreatic cancer on high-risk individuals: A prospective analysis. *Psychooncology* 2020;29(6):1004-  
35 11.doi:10.1002/pon.5370
- 36 62. Mainiero MB, Schepps B, Clements NC, et al. Mammography-related anxiety: effect of  
37 preprocedural patient education. *Womens Health Issues* 2001;11(2):110-5.doi:10.1016/s1049-  
38 3867(00)00071-2
- 39 63. Domar AD, Eyvazzadeh A, Allen S, et al. Relaxation techniques for reducing pain and anxiety  
40 during screening mammography. *AJR Am J Roentgenol* 2005;184(2):445-  
41 7.doi:10.2214/ajr.184.2.01840445
- 42 64. Fernandez-Feito A, Lana A, Baldonado-Cernuda R, et al. A brief nursing intervention reduces  
43 anxiety before breast cancer screening mammography. *Psicothema* 2015;27(2):128-  
44 33.doi:10.7334/psicothema2014.203
- 45 65. Caruso A, Bongiorno L, Vallini L, et al. Breast cancer and distress resulting from Magnetic  
46 Resonance Imaging (MRI): the impact of a psychological intervention of emotional and informative  
47 support. *J Exp Clin Cancer Res* 2006;25(4):499-505
- 48 66. Vogel WV, Valdes Olmos RA, Tijs TJ, et al. Intervention to lower anxiety of 18F-FDG PET/CT  
49 patients by use of audiovisual imagery during the uptake phase before imaging. *J Nucl Med Technol*  
50 2012;40(2):92-8.doi:10.2967/jnmt.111.097964
- 51  
52  
53  
54  
55  
56  
57  
58

- 1  
2  
3 67. Acuff SN, Bradley YC, Barlow P, et al. Reduction of patient anxiety in PET/CT imaging by  
4 improving communication between patient and technologist. *J Nucl Med Technol* 2014;42(3):211-  
5 7.doi:10.2967/jnmt.114.139915  
6  
7 68. Raz DJ, Nelson RA, Kim JY, et al. Pilot study of a video intervention to reduce anxiety and  
8 promote preparedness for lung cancer screening. *Cancer Treat Res Commun* 2018;16:1-  
9 8.doi:10.1016/j.ctarc.2018.04.004  
10  
11 69. Zavotsky KE, Banavage A, James P, et al. The effects of music on pain and anxiety during  
12 screening mammography. *Clin J Oncol Nurs* 2014;18(3):E45-9.doi:10.1188/14.CJON.E45-E49  
13  
14 70. Ashton JC, Bousquet D, Fevrier E, et al. Massage therapy in the breast imaging department:  
15 repurposing an ancient anxiety reducing method. *Clin Imaging* 2020;67:49-  
16 54.doi:10.1016/j.clinimag.2020.05.029  
17  
18 71. Lorca AM, Lorca MM, Criado JJ, et al. Using mindfulness to reduce anxiety during pet/ct studies.  
19 *Mindfulness* 2019;10:1163-8.doi:10.1007/s12671-018-1065-2  
20  
21 72. Spielberger CD, Gorsuch RL, Lushene R, et al. Manual for the State-Trait Anxiety Inventory. Palo  
22 Alto, CA: Consulting Psychologists Press 1983.  
23  
24 73. Zigmond AS, Snaith RP. The Hospital Anxiety and Depression Scale. *Acta Psychiatr Scand*  
25 1983;67(6):361-70.doi:10.1111/j.1600-0447.1983.tb09716.x  
26  
27 74. Rush Jr AJ, First MB, Blacker D. Handbook of Psychiatric Measures: Symptom Checklist-90-  
28 Revised (SCL-90-R); Brief Symptom Inventory (BSI). 2nd ed. Arlington, VA: American Psychiatric  
29 Publishing, Inc. 2008.  
30  
31 75. Al-Dibouni Z. Scanxiety. Improving the patient's experience. Part 1. *Imaging & Therapy Practice*  
32 2019;21-5  
33  
34 76. Marteau T, Bekker H. The development of a six-item short-form of the state scale of the  
35 Spielberger State-Trait Anxiety Inventory (STAI). *Br J Clin Psychol* 1992;31(3):301-6.doi:10.1111/j.2044-  
36 8260.1992.tb00997.x  
37  
38 77. Ownby K. Use of the Distress Thermometer in Clinical Practice. *J Adv Pract Oncol*  
39 2019;10(2).doi:10.6004/jadpro.2019.10.2.7  
40  
41 78. Pitman A, Suleman S, Hyde N, et al. Depression and anxiety in patients with cancer. *BMJ*  
42 2018;361:k1415.doi:10.1136/bmj.k1415  
43  
44  
45  
46  
47  
48  
49  
50  
51  
52  
53  
54  
55  
56  
57  
58

## FIGURE CAPTIONS

40 **Figure 1.** Search strategy used for Ovid MEDLINE (1946 onwards)

42 **Figure 2.** Study search and selection flow diagram

**Figure 1.** Search strategy used for Ovid MEDLINE (1946 onwards)

| # | Search                | #  | Search                  | #  | Search                 | #  | Search           |
|---|-----------------------|----|-------------------------|----|------------------------|----|------------------|
| 1 | Exp Neoplasms/        | 10 | Exp Diagnostic Imaging/ | 15 | exp Anxiety/           | 22 | or/1-9           |
| 2 | Exp Medical oncology/ | 11 | imaging.ti,ab           | 16 | exp Anxiety Disorders/ | 23 | or/10-14         |
| 3 | neoplasm*.ti,ab       | 12 | scan.ti,ab              | 17 | exp Fear/              | 24 | or/15-21         |
| 4 | cancer*.ti,ab         | 13 | tomography.ti,ab        | 18 | anxi*.ti,ab            | 25 | 22 and 23 and 24 |
| 5 | neoplasm*.ti,ab       | 14 | ultraso*.ti,ab          | 19 | fear.ti,ab             |    |                  |
| 6 | malignan*.ti,ab       |    |                         | 20 | worr*.ti,ab            |    |                  |
| 7 | tum??r*.ti,ab         |    |                         | 21 | distress*.ti,ab        |    |                  |
| 8 | oncolog*.ti,ab        |    |                         |    |                        |    |                  |
| 9 | carcinoma*.ti,ab      |    |                         |    |                        |    |                  |

For peer review only

**Figure 2.** Study search and selection flow diagram

1  
2  
3 **Supplementary File 1. Protocol**

4 **Scanxiety: A scoping review about scan-associated anxiety**

5  
6 Protocol

7  
8 Version 1.0, 10/04/2019  
9  
10

11 **Authors**

12 Dr Kim Tam Bui

13 Dr Roger Liang

14 Dr Haryana Dhillon

15 Dr Belinda Kiely

16 Dr Prunella Blinman  
17  
18  
19  
20  
21  
22

23 **Correspondence**

24 Dr Kim Tam Bui

25 Email: [tam.bui@health.nsw.gov.au](mailto:tam.bui@health.nsw.gov.au)

26 Concord Cancer Centre

27 Concord Repatriation General Hospital

28 1A Hospital Road

29 Concord NSW 2137  
30  
31  
32  
33  
34  
35  
36  
37  
38  
39  
40  
41  
42  
43  
44  
45  
46  
47  
48  
49  
50  
51  
52  
53  
54  
55  
56  
57  
58  
59  
60

## Introduction

Radiological scans are necessary to diagnose and stage cancers, to monitor for cancer recurrence or progression or to investigate new cancer- or treatment-related problems. Imaging modalities include plain X-rays, computed tomography (CT) scans, positron-emission tomography (PET) scans, magnetic resonance imaging (MRI), ultrasound and nuclear medicine bone scans.

Distress before, during or after a scan has been dubbed “scanxiety” by a patient writing for the Time Magazine in 2011[1]. This is a common clinical problem that is widely discussed on social media and patient forms, but there is a paucity in the literature about this topic. This systematic scoping study aims to increase the understanding about scanxiety.

## Objectives

The objectives of this study are to:

- determine the incidence and severity of scanxiety in adults who have scans for cancer-related reasons;
- compare tools that measure scanxiety;
- identify contributing and exacerbating determinants of scanxiety;
- identify strategies or interventions that reduce scanxiety; and,
- explore the experiences of scanxiety for patients and other stakeholders

## Methods

This protocol is based on the six-step methodological framework developed by Arskey & O’Malley[2] and modified by Levac *et al.*[3], and guided by the Preferred Reporting Items for Systematic review and Meta-Analysis Protocols extension for Scoping Reviews (PRISMA-ScR) checklist[4].

## ***Inclusion and exclusion criteria***

Publications will be included if they were original full-text research articles that addressed scanxiety in adults over 18 years of age who had a scan for a cancer-related reason. Outcome measures have to include at least one of the following: the incidence of scanxiety; severity of scanxiety; contributing or exacerbating factors of scanxiety; intervention to improve scanxiety, or; experiences of patients with scanxiety. All types of non-interventional imaging modalities are acceptable. Any type or stage of cancer is acceptable, including populations undergoing cancer screening. No date or language restriction will be applied to electronic database searching.

Interventional imaging will be excluded. Review articles, editorials, letters and protocols will be excluded.

### ***Search protocol***

A systematic review of the following electronic databases will be conducted by one author (KTB): Ovid MEDLINE, Ovid EMBASE, Ovid PsycINFO, Ovid Cochrane, Scopus, ESCBO CINAHL and PubMed. The search strategy will combine the subject headings and keywords of cancer (neoplasm\* or cancer\* or malignan\* or tum??r\* or oncolog\* or carcinoma\*), imaging (diagnostic imaging or imaging or scan\* or tomography or ultraso\* or radionucl\*) and anxiety (anxi\* or fear\* or worr\* or distress\*). Hand searching of reference lists of included articles will be undertaken.

All references will be imported into Endnote V9. After removal of duplicates, two authors (KTB and RL) will independently review and screen publication titles and abstracts for eligibility. Of the articles deemed potentially eligible, the full text of the article will be evaluated for final inclusion. Discrepancies will be decided by discussion between the two authors (KTB and RL), and will be escalated to all authors if a consensus cannot be reached.

### ***Data extraction and analysis***

Standardised data collection forms will be developed. Relevant data will be independently extracted from by two authors (KTB and RL) into an electronic data extraction form (Table 1).

Table 1. Included data items on the electronic data extraction form

|                     |                                                                                                                       |
|---------------------|-----------------------------------------------------------------------------------------------------------------------|
| Publication details | Study name/Title of article<br>Study authors<br>Date of publication (year)<br>Country the study was held              |
| Study details       | Study aims<br>Population including age, gender, type of cancer<br>Study design<br>Measurement tool used for scanxiety |
| Results/outcomes    | Sample size<br>Demographics – gender, age<br>Cancer factors – type of cancers included<br>Incidence of scanxiety      |

|  |                                                              |
|--|--------------------------------------------------------------|
|  | Severity of scanxiety                                        |
|  | Contributing and exacerbating determinants of scanxiety      |
|  | Experiences of scanxiety for patients and other stakeholders |
|  | If intervention: efficacy                                    |

Data will be analysed depending on the population who underwent imaging (eg for screening, for early cancer or for advanced cancer) and the type of study (eg observational or intervention). Quantitative findings will be synthesised using summary statistics including the mean and range.

### **Consultation**

Health care professionals with clinical experience in oncology and psychology will be consulted for content expertise and to discuss preliminary findings.

### **References**

1. Feiler B. Scanxiety. Fear of a postcancer ritual. *Time*. 2011;177(24):56.
2. Arksey H, O'Malley L. Scoping studies: towards a methodological framework. *International Journal of Social Research Methodology*. 2005;8(1):19-32.
3. Levac D, Colquhoun H, O'Brien KK. Scoping studies: advancing the methodology. *Implement Sci*. 2010;5:69.
4. Tricco AC, Lillie E, Zarin W, O'Brien KK, Colquhoun H, Levac D, et al. PRISMA Extension for Scoping Reviews (PRISMA-ScR): Checklist and Explanation. *Ann Intern Med*. 2018;169(7):467-73.



1  
2  
3  
4  
5  
6  
7  
8  
9  
10  
11  
12  
13  
14  
15  
16  
17  
18  
19  
20  
21  
22  
23  
24  
25  
26  
27  
28  
29  
30  
31  
32  
33  
34  
35  
36  
37  
38  
39  
40  
41  
42  
43  
44  
45  
46  
47  
48  
49  
50  
51  
52  
53  
54  
55  
56  
57  
58  
59  
60

For peer review only

**Supplementary File 2. Protocol amendments****Scanxiety: A scoping review about scan-associated anxiety**

The original protocol dated 10/04/2019 was amended as per the following statements:

- 1) The objective 'to explore the experiences of scanxiety for patients and other stakeholders' was abandoned due to feasibility of conducting qualitative and quantitative data analysis with the volume of literature identified
- 2) Inclusion criteria were updated to reflect changes in Amendment 1: experiences of patients with scanxiety were not included; only studies that quantitatively assessed prevalence and severity of scanxiety or met one of the other objectives were included
- 3) As per recommendations on scoping review methodology, exclusion criteria were updated *post hoc* and were expanded to also exclude studies involving follow-up scans for a positive screening result, because the psychological experiences of asymptomatic persons facing a potential new cancer diagnosis may lead to higher anxiety than is attribute to scanxiety itself.
- 4) Exclusion criteria were also updated to reflect changes in Amendment 1, where studies that only qualitatively assessed scanxiety were excluded

## Research checklist

**Scanxiety: A scoping review about scan-associated anxiety**

## Preferred Reporting Items for Systematic reviews and Meta-Analyses extension for Scoping Reviews (PRISMA-ScR) Checklist

| SECTION                          | ITEM | PRISMA-ScR CHECKLIST ITEM                                                                                                                                                                                                                                                                                  | REPORTED ON PAGE # |
|----------------------------------|------|------------------------------------------------------------------------------------------------------------------------------------------------------------------------------------------------------------------------------------------------------------------------------------------------------------|--------------------|
| <b>TITLE</b>                     |      |                                                                                                                                                                                                                                                                                                            |                    |
| Title                            | 1    | Identify the report as a scoping review.                                                                                                                                                                                                                                                                   | 1                  |
| <b>ABSTRACT</b>                  |      |                                                                                                                                                                                                                                                                                                            |                    |
| Structured summary               | 2    | Provide a structured summary that includes (as applicable): background, objectives, eligibility criteria, sources of evidence, charting methods, results, and conclusions that relate to the review questions and objectives.                                                                              | 2                  |
| <b>INTRODUCTION</b>              |      |                                                                                                                                                                                                                                                                                                            |                    |
| Rationale                        | 3    | Describe the rationale for the review in the context of what is already known. Explain why the review questions/objectives lend themselves to a scoping review approach.                                                                                                                                   | 3                  |
| Objectives                       | 4    | Provide an explicit statement of the questions and objectives being addressed with reference to their key elements (e.g., population or participants, concepts, and context) or other relevant key elements used to conceptualize the review questions and/or objectives.                                  | 3                  |
| <b>METHODS</b>                   |      |                                                                                                                                                                                                                                                                                                            |                    |
| Protocol and registration        | 5    | Indicate whether a review protocol exists; state if and where it can be accessed (e.g., a Web address); and if available, provide registration information, including the registration number.                                                                                                             | 3                  |
| Eligibility criteria             | 6    | Specify characteristics of the sources of evidence used as eligibility criteria (e.g., years considered, language, and publication status), and provide a rationale.                                                                                                                                       | 3-4                |
| Information sources              | 7    | Describe all information sources in the search (e.g., databases with dates of coverage and contact with authors to identify additional sources), as well as the date the most recent search was executed.                                                                                                  | 3                  |
| Search                           | 8    | Present the full electronic search strategy for at least 1 database, including any limits used, such that it could be repeated.                                                                                                                                                                            | Figure 1           |
| Selection of sources of evidence | 9    | State the process for selecting sources of evidence (i.e., screening and eligibility) included in the scoping review.                                                                                                                                                                                      | 4                  |
| Data charting process            | 10   | Describe the methods of charting data from the included sources of evidence (e.g., calibrated forms or forms that have been tested by the team before their use, and whether data charting was done independently or in duplicate) and any processes for obtaining and confirming data from investigators. | 4                  |
| Data items                       | 11   | List and define all variables for which data were sought and any assumptions and simplifications made.                                                                                                                                                                                                     | 4                  |

| SECTION                                              | ITEM | PRISMA-ScR CHECKLIST ITEM                                                                                                                                                                             | REPORTED ON PAGE #                   |
|------------------------------------------------------|------|-------------------------------------------------------------------------------------------------------------------------------------------------------------------------------------------------------|--------------------------------------|
| Critical appraisal of individual sources of evidence | 12   | If done, provide a rationale for conducting a critical appraisal of included sources of evidence; describe the methods used and how this information was used in any data synthesis (if appropriate). | N/A                                  |
| Synthesis of results                                 | 13   | Describe the methods of handling and summarizing the data that were charted.                                                                                                                          | 4                                    |
| <b>RESULTS</b>                                       |      |                                                                                                                                                                                                       |                                      |
| Selection of sources of evidence                     | 14   | Give numbers of sources of evidence screened, assessed for eligibility, and included in the review, with reasons for exclusions at each stage, ideally using a flow diagram.                          | Figure 2                             |
| Characteristics of sources of evidence               | 15   | For each source of evidence, present characteristics for which data were charted and provide the citations.                                                                                           | 5-10, including Tables 1 and 2       |
| Critical appraisal within sources of evidence        | 16   | If done, present data on critical appraisal of included sources of evidence (see item 12).                                                                                                            | N/A                                  |
| Results of individual sources of evidence            | 17   | For each included source of evidence, present the relevant data that were charted that relate to the review questions and objectives.                                                                 | 11-18, including Tables 3,4, 5 and 6 |
| Synthesis of results                                 | 18   | Summarize and/or present the charting results as they relate to the review questions and objectives.                                                                                                  | 11-18                                |
| <b>DISCUSSION</b>                                    |      |                                                                                                                                                                                                       |                                      |
| Summary of evidence                                  | 19   | Summarize the main results (including an overview of concepts, themes, and types of evidence available), link to the review questions and objectives, and consider the relevance to key groups.       | 18-19                                |
| Limitations                                          | 20   | Discuss the limitations of the scoping review process.                                                                                                                                                | 19                                   |
| Conclusions                                          | 21   | Provide a general interpretation of the results with respect to the review questions and objectives, as well as potential implications and/or next steps.                                             | 19                                   |
| <b>FUNDING</b>                                       |      |                                                                                                                                                                                                       |                                      |
| Funding                                              | 22   | Describe sources of funding for the included sources of evidence, as well as sources of funding for the scoping review. Describe the role of the funders of the scoping review.                       | 20                                   |

# BMJ Open

## Scanxiety: A scoping review about scan-associated anxiety

|                                 |                                                                                                                                                                                                                                                                                                                                                                                                                                                                                                                                                         |
|---------------------------------|---------------------------------------------------------------------------------------------------------------------------------------------------------------------------------------------------------------------------------------------------------------------------------------------------------------------------------------------------------------------------------------------------------------------------------------------------------------------------------------------------------------------------------------------------------|
| Journal:                        | <i>BMJ Open</i>                                                                                                                                                                                                                                                                                                                                                                                                                                                                                                                                         |
| Manuscript ID                   | bmjopen-2020-043215.R3                                                                                                                                                                                                                                                                                                                                                                                                                                                                                                                                  |
| Article Type:                   | Original research                                                                                                                                                                                                                                                                                                                                                                                                                                                                                                                                       |
| Date Submitted by the Author:   | 19-Apr-2021                                                                                                                                                                                                                                                                                                                                                                                                                                                                                                                                             |
| Complete List of Authors:       | Bui, Kim Tam; Concord Repatriation General Hospital, Medical Oncology; The University of Sydney Sydney Medical School<br>Liang, Roger; Concord Repatriation General Hospital, Medical Oncology<br>Kiely, Belinda; Concord Repatriation General Hospital, Medical Oncology; The University of Sydney Sydney Medical School<br>Brown, Chris; NHMRC Clinical Trials Centre<br>Dhillon, Haryana; The University of Sydney, Psycho-Oncology Cooperative Research Group; CEMPED<br>Blinman, Prunella; Concord Repatriation General Hospital, Medical Oncology |
| <b>Primary Subject Heading</b>: | Oncology                                                                                                                                                                                                                                                                                                                                                                                                                                                                                                                                                |
| Secondary Subject Heading:      | Radiology and imaging                                                                                                                                                                                                                                                                                                                                                                                                                                                                                                                                   |
| Keywords:                       | Adult oncology < ONCOLOGY, Diagnostic radiology < RADIOLOGY & IMAGING, Anxiety disorders < PSYCHIATRY                                                                                                                                                                                                                                                                                                                                                                                                                                                   |
|                                 |                                                                                                                                                                                                                                                                                                                                                                                                                                                                                                                                                         |

SCHOLARONE™  
Manuscripts



I, the Submitting Author has the right to grant and does grant on behalf of all authors of the Work (as defined in the below author licence), an exclusive licence and/or a non-exclusive licence for contributions from authors who are: i) UK Crown employees; ii) where BMJ has agreed a CC-BY licence shall apply, and/or iii) in accordance with the terms applicable for US Federal Government officers or employees acting as part of their official duties; on a worldwide, perpetual, irrevocable, royalty-free basis to BMJ Publishing Group Ltd ("BMJ") its licensees and where the relevant Journal is co-owned by BMJ to the co-owners of the Journal, to publish the Work in this journal and any other BMJ products and to exploit all rights, as set out in our [licence](#).

The Submitting Author accepts and understands that any supply made under these terms is made by BMJ to the Submitting Author unless you are acting as an employee on behalf of your employer or a postgraduate student of an affiliated institution which is paying any applicable article publishing charge ("APC") for Open Access articles. Where the Submitting Author wishes to make the Work available on an Open Access basis (and intends to pay the relevant APC), the terms of reuse of such Open Access shall be governed by a Creative Commons licence – details of these licences and which [Creative Commons](#) licence will apply to this Work are set out in our licence referred to above.

Other than as permitted in any relevant BMJ Author's Self Archiving Policies, I confirm this Work has not been accepted for publication elsewhere, is not being considered for publication elsewhere and does not duplicate material already published. I confirm all authors consent to publication of this Work and authorise the granting of this licence.

**Title**

Scanxiety: A scoping review about scan-associated anxiety

**Authors:**

Kim Tam Bui<sup>1,2</sup>, Roger Liang<sup>1</sup>, Belinda E Kiely<sup>1,2,3</sup>, Chris Brown<sup>3</sup>, Haryana M Dhillon<sup>4,5</sup> & Prunella Blinman<sup>1,2</sup>

**Affiliations:**

<sup>1</sup>Medical Oncology, Concord Cancer Centre, Concord, NSW, Australia

<sup>2</sup>Sydney Medical School, University of Sydney, Camperdown, NSW, Australia

<sup>3</sup>NHMRC Clinical Trials Centre, University of Sydney, Camperdown, NSW, Australia

<sup>4</sup>Psycho-Oncology Cooperative Research Group, School of Psychology, University of Sydney, Camperdown, NSW, Australia

<sup>5</sup>Centre for Medical Psychology & Evidence-based Decision-making, University of Sydney, Camperdown NSW, Australia

**Corresponding author:**

Prunella Blinman

Postal address: Medical Oncology

Concord Cancer Centre

1A Hospital Road

Concord NSW 2137

Email: prunella.blinman@health.nsw.gov.au

ORCID ID: 0000-0002-0712-372X

**Word count: 4042**

Keywords: scanxiety, imaging, scans, cancer, anxiety

**Presentations**

Bui, K.T., Liang, R., Kiely, B.E., Brown, C., Dhillon, H.M. & Blinman, P. What is scanxiety? A systematic scoping review [Poster]. Proceedings of the 2020 MOGA Abstract and Poster Program for Medical Oncology Advanced Trainees and Young Oncologists, 2020 August 14-21; Asia Pac J Clin Oncol, 16(2), 30-31.

## Abstract

**Objectives:** To identify available literature on prevalence, severity and contributing factors of scan-associated anxiety ('scanxiety'), and interventions to reduce it.

**Design:** Systematic scoping review.

**Data sources:** Ovid MEDLINE, Ovid EMBASE, Ovid PsycINFO, Ovid Cochrane Central Register of Controlled Trials, Scopus, EBSCO CINAHL and PubMed up to July 2020.

**Study selection:** Eligible studies recruited people having cancer-related non-invasive scans (including screening) and contained a quantitative assessment of scanxiety.

**Data extraction:** Demographics and scanxiety outcomes were recorded and data summarised by descriptive statistics.

**Results:** Of 26,693 citations, 57 studies were included across a range of scan types (mammogram 26/57, 46%; positron-emission tomography 14/57, 25%; computed tomography 14/57, 25%) and designs (observation 47/57, 82%; intervention 10/57, 18%). Eighty-one measurement tools were used to quantify prevalence and/or severity of scanxiety, including purpose-designed Likert scales (17/81, 21%); the State Trait Anxiety Inventory (14/81, 17%) and the Hospital Anxiety and Depression Scale (9/81, 11%). Scanxiety prevalence ranged from 0% to 64% (above pre-specified thresholds) or 13% to 83% ('any' anxiety, if no threshold). Mean severity scores appeared low in almost all measures which quantitatively measured scanxiety (54/62, 87%), regardless of whether anxiety thresholds were pre-specified. Moderate to severe scanxiety occurred in 4% to 28% of people in studies using descriptive measures. Nine of 20 studies assessing scanxiety pre- and post-scan reported significant post-scan reduction in scanxiety. Lower education, smoking, higher levels of pain, higher perceived risk of cancer and diagnostic scans (v screening scans) consistently correlated with higher scanxiety severity, but not age, gender, ethnicity or marital status. Interventions included relaxation, distraction, education and psychological support. Six of 10 interventions showed a reduction in scanxiety.

**Conclusions:** Prevalence and severity of scanxiety varied widely likely due to heterogeneous methods of measurement. A uniform approach to evaluating scanxiety will improve understanding of the phenomenon and help guide interventions.

### Strengths and limitations of this study

- This is the first scoping review on scanxiety
- A comprehensive search strategy and broad inclusion criteria have resulted in an extensive summary of all available literature
- Summary statistics for prevalence and severity of scanxiety were not possible due to heterogeneity in the type and timing of measurement tools between the studies.



## INTRODUCTION

Anxiety may increase when people have scans to screen for, diagnose, or stage cancer, or to monitor cancer for recurrence or progression. Scan-associated anxiety, or the distress before, during or after a scan, was first dubbed 'scanxiety' by a patient writing for the Time Magazine in 2011[1].

Qualitative research on the experience of having a scan has shown some people experience dread in the weeks before a scan[2], perceive scans as dehumanising, unpleasant or causing claustrophobia[2-5], and find scans trigger fear of the unknown and fear of cancer recurrence[2, 3, 6]. Scanxiety is recognised as a common clinical concern on social media and public forums, and is acknowledged by international cancer institutions[7, 8] and cancer-specific support networks[9-11]. Despite this, scanxiety is not uniformly recognised or measured in published studies. We conducted a systematic scoping review to identify the available literature on scanxiety in people having cancer-related scans.

## METHODS

We conducted a systematic scoping review based on the six-step methodological framework developed by Arskey & O'Malley[12] and modified by Levac *et al.*[13], and guided by the Preferred Reporting Items for Systematic review and Meta-Analysis protocols extension for Scoping Reviews (PRISMA-ScR) checklist[14]. The study protocol and amendments are available (**Supplementary File 1 & 2**).

### Step 1: Research question

Our aim was to increase the understanding of scanxiety by: determining the prevalence and severity of scanxiety; identifying contributing factors to scanxiety; identifying interventions to reduce scanxiety in people having cancer-related scans; and, exploring patient experiences with scanxiety.

### Step 2: Search strategy

Published studies were identified from seven electronic databases: Ovid MEDLINE (1946 onwards), Ovid EMBASE (1947 onwards), Ovid PsycINFO (1806 onwards), Ovid Cochrane Central Register of Controlled Trials (1991 onwards), Scopus (any year), EBSCO CINAHL (any year) and PubMed (any year). The search strategy combined the subject headings and keywords of cancer, imaging and anxiety. An example is provided in **Figure 1**. Reference lists of included articles were hand-searched for additional studies. All references were imported into Endnote V9.

The initial search was conducted on April 11, 2019, and updated on July 3, 2020.

### Step 3: Study selection

Inclusion criteria were full-text original research studies that recruited adults ( $\geq 18$  years old) who had a non-invasive scan for a cancer-related reason, and which quantitatively assessed the prevalence or severity of scanxiety, reported a statistical comparison between pre- and post-scan scanxiety, reported a

1  
2  
3 statistical comparison between scanxiety and possible contributing factors, or evaluated the impact of  
4 an intervention on scanxiety.  
5

6 Cancer-related reasons included screening (detection of cancer in asymptomatic person), diagnosis  
7 (detection of cancer in symptomatic person), staging (determining extent of cancer in person with  
8 confirmed or suspected cancer), surveillance (detection of recurrence in person with cancer treated with  
9 curative intent) or monitoring (detection of progression in person with cancer treated with non-curative  
10 intent).  
11

12  
13 The measurement of scanxiety was defined as any measure of anxiety, distress or worry occurring  
14 around the time of a scan. This included any period before, during or after a scan where the scan was  
15 used as a reference point for the measurement of scanxiety. All non-invasive imaging modalities were  
16 accepted. No date restrictions were applied. Foreign language material was included if an English  
17 translation was available.  
18

19  
20 After initial review of citations and based on increasing familiarity with the literature, and in line with  
21 recommendations on scoping review methodology[12], exclusion criteria were developed *post hoc*.  
22 Exclusion criteria were: studies involving invasive scans (eg transvaginal ultrasound, ultrasound with fine  
23 needle aspirate, or endoscopic ultrasound) due to differences in scan preparation and risk of adverse  
24 events; and, studies of scans performed to investigate a positive initial screening result because the  
25 psychological experiences of asymptomatic persons facing a potential new cancer diagnosis may lead to  
26 higher anxiety than is attributable to scanxiety. Due to feasibility of conducting quantitative and  
27 qualitative analysis with the volume of literature identified, studies reporting only a qualitative  
28 assessment of scanxiety were also excluded, and the objective to explore patient experiences was  
29 abandoned.  
30  
31

32  
33 After removal of duplicate citations, two authors (KTB, RL) independently reviewed and screened  
34 publication titles and abstracts based on the eligibility criteria. Of the studies deemed potentially  
35 eligible, full texts were evaluated for final inclusion. Discrepancies were resolved by discussion between  
36 the two authors (KTB, RL) and were escalated to all authors if a consensus could not be reached.  
37  
38  
39

#### 40 **Step 4: Charting the data**

41  
42 Relevant data were independently extracted by two authors (KTB, RL) into an electronic data extraction  
43 form in Microsoft Excel, which included study demographics and methodology, scanxiety measurement  
44 tools, and the outcome measures of prevalence and severity of scanxiety, contributing factors to  
45 scanxiety, and interventions to reduce scanxiety.  
46  
47  
48

#### 49 **Step 5: Collating, summarizing and reporting the results**

50  
51 Study data was tabulated to assist with a descriptive numerical summary of the range of cancer types,  
52 imaging modalities, study methodology and scanxiety measurement tools. Associations between  
53 scanxiety and potential contributing factors were tabulated if three or more studies reported a  
54 statistical comparison.  
55  
56  
57  
58

1  
2  
3 The prevalence of scanxiety was identified in two ways:  
4

- 5 • The percentage of people who scored above the pre-specified clinically important anxiety  
6 threshold, if reported; or,
- 7 • The percentage of people who scored any degree of anxiety, if no pre-specified threshold was  
8 reported.  
9

10 Severity of scanxiety was defined in three ways:

- 11 • Any mean score of the anxiety measure above the pre-specified clinically important anxiety  
12 threshold, if reported;
- 13 • Any mean score of the anxiety measure that was at least half the total score, if an anxiety  
14 threshold was not reported; or
- 15 • At least 'moderate' anxiety (or its equivalent) on a descriptive range.  
16  
17  
18

19 The definitions of prevalence and severity were purposely designed to allow descriptive comparisons  
20 between the studies as we anticipated heterogeneity in scanxiety measurement would preclude  
21 meaningful summary statistics.  
22

23 The components of intervention studies and their effect on scanxiety were summarised and reported  
24 descriptively.  
25  
26  
27

## 28 **Step 6: Consultation**

29  
30 Medical oncologists (PB, BK), a behavioural scientist (HD) and a statistician (CB) were consulted for  
31 content expertise to develop the study objectives and to improve clarity on clinically relevant  
32 interpretations of the data.  
33  
34  
35

## 36 **Patient and public involvement**

37  
38 This research did not directly involve patients and public. Our research was initiated by repeated  
39 observations of scanxiety in oncology patients.  
40  
41  
42

## 43 **RESULTS**

44  
45 The study search identified 26,693 citations. The selection process is outlined in **Figure 2**. After removal  
46 of duplicates, abstract and title screening, and full-text review, 57 eligible studies involving 21,352  
47 people were included.  
48  
49  
50

## 51 **Demographics and study details**

52  
53 Observational studies  
54  
55  
56  
57  
58

1  
2  
3 There were 47 observational studies (**Table 1**) involving 19,498 people[15-61]. Participants most  
4 commonly had scans for breast cancer (22 studies,  $n=14,338$  women[16, 18-27, 29, 31, 36, 38, 40, 42,  
5 43, 45, 48, 56, 58]), the most common scans were mammograms (21 studies[16, 18-27, 29, 31, 36, 38,  
6 40, 42, 43, 45, 48, 56]), and most studies used self-report surveys to assess scanxiety (40 studies[15, 16,  
7 18-36, 38, 40-54, 56, 58, 59]).  
8  
9  
10  
11  
12  
13  
14  
15  
16  
17  
18  
19  
20  
21  
22  
23  
24  
25  
26  
27  
28  
29  
30  
31  
32  
33  
34  
35  
36  
37  
38  
39  
40  
41  
42  
43  
44  
45  
46  
47  
48  
49  
50  
51  
52  
53  
54  
55  
56  
57  
58

For peer review only

**Table 1.** Demographics and study details for the 47 observational studies

| First author                    | Year | n    | Country of study     | Cancer type   | Age (years) (Mean <sup>a</sup> )                                               | Female (%) | Married or de facto (%) | At least secondary education (%) | First scan (%) | Scan type              | Reason for scan           | Methods                   |
|---------------------------------|------|------|----------------------|---------------|--------------------------------------------------------------------------------|------------|-------------------------|----------------------------------|----------------|------------------------|---------------------------|---------------------------|
| Andolf[15]                      | 1990 | 275  | Sweden               | Ovarian       | NR                                                                             | 100        | NR                      | NR                               | NR             | Abdominal ultrasound   | Screening                 | Cross-sectional survey    |
| Bull <sup>b,c</sup> [16]        | 1991 | 541  | UK                   | Breast        | 50 to 54: 23%<br>55 to 59s 29%<br>60 to 64: 34%<br>65 to 70: 7%<br>Unknown: 7% | 100        | NR                      | NR                               | NR             | Mammogram              | Screening                 | Longitudinal surveys      |
| Peteet[17]                      | 1992 | 79   | USA                  | Any           | NR                                                                             | NR         | NR                      | NR                               | 4              | CT                     | Any (except screening)    | Cross-sectional interview |
| Cockburn <sup>c</sup> [18]      | 1994 | 200  | Australia            | Breast        | NR                                                                             | 100        | NR                      | NR                               | NR             | Mammogram              | Screening                 | Longitudinal surveys      |
| Ellman <sup>c</sup> [19]        | 1995 | 331  | UK                   | Breast        | 50 to 64: 52%<br>65 to 78: 48%                                                 | 100        | NR                      | NR                               | NR             | Mammogram              | Screening or surveillance | Cross-sectional survey    |
| Sutton <sup>c,d</sup> [20]      | 1995 | 306  | UK                   | Breast        | 58                                                                             | 100        | 76                      | 50                               | NR             | Mammogram              | Screening                 | Longitudinal surveys      |
| Bakker[21]                      | 1998 | 315  | Canada               | Breast        | 61                                                                             | 100        | 71                      | 76                               | 50             | Mammogram              | Screening                 | Longitudinal surveys      |
| Gupta[22]                       | 1999 | 167  | Kuwait               | Breast        | Range 14 to 63                                                                 | 100        | NR                      | 82                               | NR             | Mammogram ± ultrasound | Screening or diagnosis    | Cross-sectional survey    |
| Hafslund[23]                    | 2000 | 170  | Norway               | Breast        | NR                                                                             | 100        | NR                      | NR                               | NR             | Mammogram              | Diagnosis                 | Longitudinal surveys      |
| Meystre-Agustoni[24]            | 2001 | 887  | Switzerland          | Breast        | 50 to 54: 36%<br>55 to 59: 22%<br>60 to 64: 20%<br>65 to 69: 22%               | 100        | 77                      | 62                               | 27             | Mammogram              | Screening                 | Longitudinal surveys      |
| Drossaert[25]                   | 2002 | 2657 | Netherlands          | Breast        | 58                                                                             | 100        | 78                      | 32                               | NR             | Mammogram              | Screening                 | Longitudinal surveys      |
| Sandin <sup>c,d</sup> [26]      | 2002 | 598  | Spain                | Breast        | 51                                                                             | 100        | 77                      | 41                               | NR             | Mammogram              | Screening                 | Longitudinal surveys      |
| Brunton[27]                     | 2005 | 584  | New Zealand          | Breast        | 50 to 54: 38%<br>55 to 59: 35%<br>60 to 64: 27%                                | 100        | NR                      | 74                               | <20%           | Mammogram              | Screening                 | Cross-sectional survey    |
| Geurts[28]                      | 2006 | 106  | Netherlands          | Head and neck | 56                                                                             | 36         | NR                      | 29                               | NR             | Chest X-ray            | Surveillance              | Cross-sectional survey    |
| Tyndel <sup>c</sup> [29]        | 2007 | 1174 | UK                   | Breast        | 43                                                                             | 100        | 83                      | 33                               | 87             | Mammogram              | Screening                 | Longitudinal surveys      |
| Bunge <sup>b</sup> [30]         | 2008 | 324  | Netherlands, Belgium | Lung          | 60                                                                             | 49         | NR                      | NR                               | NR             | CT                     | Screening                 | Longitudinal surveys      |
| Brown Sofair <sup>b</sup> [31]  | 2008 | 47   | USA                  | Breast        | 50                                                                             | 100        | 34                      | 80                               | NR             | Mammogram              | Screening                 | Longitudinal surveys      |
| van den Bergh <sup>b</sup> [32] | 2008 | 324  | Netherlands, Belgium | Lung          | 60                                                                             | 49         | 64                      | 82                               | 66             | CT                     | Screening                 | Longitudinal surveys      |
| Westerterp <sup>b</sup> [33]    | 2008 | 82   | Netherlands          | Oesophageal   | 64                                                                             | 18         | NR                      | NR                               | NR             | CT + PET               | Diagnosis & staging       | Cross-sectional survey    |
| Bastiaannet[34]                 | 2009 | 59   | Netherlands          | Melanoma      | Median: 59                                                                     | 44         | 69                      | 66                               | NR             | CT, PET ± Chest X-ray  | Staging                   | Cross-sectional survey    |
| Vierikko <sup>b</sup> [35]      | 2009 | 601  | Finland              | Lung          | 65                                                                             | 0          | 36                      | NR                               | NR             | CT                     | Screening                 | Longitudinal surveys      |

|    |                            |      |      |                 |                           |            |     |    |    |     |                              |                                    |                           |
|----|----------------------------|------|------|-----------------|---------------------------|------------|-----|----|----|-----|------------------------------|------------------------------------|---------------------------|
| 1  |                            |      |      |                 |                           |            |     |    |    |     |                              |                                    |                           |
| 2  |                            |      |      |                 |                           |            |     |    |    |     |                              |                                    |                           |
| 3  |                            |      |      |                 |                           |            |     |    |    |     |                              |                                    |                           |
| 4  | Bolukbas[36]               | 2010 | 93   | Turkey          | Breast                    | 48         | 100 | 97 | 10 | 45  | Mammogram                    | Screening or diagnosis             | Cross-sectional survey    |
| 5  | Thompson[37]               | 2010 | 70   | USA             | Lymphoma                  | Median: 47 | 64  | 53 | 97 | NR  | CT                           | Surveillance                       | Cross-sectional interview |
| 6  |                            |      |      |                 |                           |            |     |    |    |     |                              |                                    |                           |
| 7  | Hutton <sup>b</sup> [38]   | 2011 | 527  | UK              | Breast                    | Median: 40 | 100 | 79 | NR | 75  | Mammogram ± MRI              | Screening                          | Longitudinal surveys      |
| 8  |                            |      |      |                 |                           |            |     |    |    |     |                              |                                    |                           |
| 9  | Pifarre[39]                | 2011 | 200  | Spain           | Any                       | 52         | 51  | NR | NR | 67  | PET/CT                       | Any (except screening)             | Cross-sectional interview |
| 10 | Steinemann[40]             | 2011 | 227  | USA             | Breast                    | NR         | 100 | NR | NR | NR  | Mammogram                    | Screening or diagnosis             | Cross-sectional survey    |
| 11 |                            |      |      |                 |                           |            |     |    |    |     |                              |                                    |                           |
| 12 | Yu[41]                     | 2011 | 398  | Brazil          | Any                       | 54         | 79  | 56 | 57 | 27  | Any                          | Any (except screening)             | Cross-sectional survey    |
| 13 |                            |      |      |                 |                           |            |     |    |    |     |                              |                                    |                           |
| 14 | Bredart <sup>b</sup> [42]  | 2012 | 637  | France          | Breast                    | 50         | 100 | NR | 87 | NR  | Mammogram ± ultrasound ± MRI | Screening or surveillance          | Longitudinal surveys      |
| 15 |                            |      |      |                 |                           |            |     |    |    |     |                              |                                    |                           |
| 16 | Hafslund <sup>c</sup> [43] | 2012 | 4249 | Norway          | Breast                    | 58         | 100 | NR | 52 | NR  | Mammogram                    | Screening                          | Cross-sectional survey    |
| 17 | Adams <sup>c</sup> [44]    | 2014 | 36   | Netherlands     | Lymphoma                  | 50         | 42  | NR | NR | NR  | CT & MRI                     | Staging                            | Cross-sectional survey    |
| 18 | Baena-Canada[45]           | 2014 | 434  | Spain           | Breast                    | 54         | 100 | 72 | 43 | 18  | Mammogram                    | Screening                          | Cross-sectional survey    |
| 19 | Andersson[46]              | 2015 | 169  | Sweden          | Any                       | 64         | 47  | 62 | 62 | 100 | PET/CT                       | Any (except screening)             | Cross-sectional survey    |
| 20 |                            |      |      |                 |                           |            |     |    |    |     |                              |                                    |                           |
| 21 | Elboga[47]                 | 2015 | 144  | Turkey          | Any                       | 63         | 46  | 83 | 52 | NR  | PET/CT                       | Any (except screening)             | Cross-sectional survey    |
| 22 |                            |      |      |                 |                           |            |     |    |    |     |                              |                                    |                           |
| 23 | Hobbs[48]                  | 2015 | 49   | Australia       | Breast                    | 55         | 100 | 79 | NR | 75  | Mammogram ± MRI              | Diagnosis                          | Longitudinal surveys      |
| 24 | Baum[49]                   | 2016 | 103  | USA             | Lung                      | Median: 67 | 61  | 73 | 53 | NR  | CT, PET ± MRI                | Monitoring                         | Cross-sectional survey    |
| 25 | Abreu[50]                  | 2017 | 232  | Portugal        | Any                       | 61         | 51  | NR | 73 | 71  | PET/CT                       | Any (except screening)             | Longitudinal surveys      |
| 26 |                            |      |      |                 |                           |            |     |    |    |     |                              |                                    |                           |
| 27 | Grilo[51]                  | 2017 | 81   | Spain, Portugal | Any                       | 55         | 53  | NR | 41 | 47  | PET/CT                       | Any (except screening)             | Longitudinal surveys      |
| 28 | Evans[52]                  | 2018 | 115  | UK              | Colorectal or Lung        | 66         | 33  | NR | NR | NR  | Whole body MRI, PET + CT     | Staging                            | Longitudinal surveys      |
| 29 |                            |      |      |                 |                           |            |     |    |    |     |                              |                                    |                           |
| 30 | Goense[53]                 | 2018 | 27   | Netherlands     | Oesophageal               | 64         | 15  | NR | NR | NR  | MRI + PET/CT                 | Staging & monitoring               | Cross-sectional survey    |
| 31 | Hall[54]                   | 2018 | 169  | USA             | Lung                      | 64         | 51  | 58 | 96 | NR  | Low dose CT                  | Screening                          | Cross-sectional survey    |
| 32 | Derry[55]                  | 2019 | 94   | USA             | Any                       | 61         | 72  | NR | 69 | 0   | Any                          | Monitoring                         | Longitudinal interview    |
| 33 | Soriano[56]                | 2019 | 57   | USA             | Breast                    | 58         | 100 | 93 | NR | 0   | Mammogram                    | Surveillance                       | Longitudinal survey       |
| 34 | Taghizadeh[57]             | 2019 | 1237 | Canada          | Lung                      | 63         | 56  | NR | 85 | NR  | CT                           | Screening                          | Longitudinal interview    |
| 35 | Bancroft[58]               | 2020 | 88   | UK, Ireland     | Breast                    | 38         | 61  | 50 | 83 | NR  | MRI                          | Screening                          | Longitudinal survey       |
| 36 |                            |      |      |                 |                           |            |     |    |    |     |                              |                                    |                           |
| 37 | Grilo[59]                  | 2020 | 94   | Portugal        | Any                       | 61         | 54  | NR | 99 | 77  | PET + bone scan              | Staging, monitoring & surveillance | Longitudinal survey       |
| 38 |                            |      |      |                 |                           |            |     |    |    |     |                              |                                    |                           |
| 39 | Morreale[60]               | 2020 | 87   | USA             | Gastrointestinal and Lung | 62         | 55  | NR | 92 | NR  | CT or MRI                    | Monitoring                         | Longitudinal interview    |
| 40 |                            |      |      |                 |                           |            |     |    |    |     |                              |                                    |                           |
| 41 | Paiella[61]                | 2020 | 54   | Italy           | Pancreatic                | 50         | 61  | NR | NR | NR  | MRI – MRCP                   | Screening                          | Cross-sectional interview |
| 42 |                            |      |      |                 |                           |            |     |    |    |     |                              |                                    |                           |
| 43 |                            |      |      |                 |                           |            |     |    |    |     |                              |                                    |                           |
| 44 |                            |      |      |                 |                           |            |     |    |    |     |                              |                                    |                           |
| 45 |                            |      |      |                 |                           |            |     |    |    |     |                              |                                    |                           |
| 46 |                            |      |      |                 |                           |            |     |    |    |     |                              |                                    |                           |
| 47 |                            |      |      |                 |                           |            |     |    |    |     |                              |                                    |                           |

1  
2  
3 UK United Kingdom, USA United States of America, NR not reported, CT computed tomography, PET positron emission tomography, MRI magnetic resonance imaging, MRCP Magnetic resonance  
4 cholangiopancreatography

5 All percentages were rounded to the nearest whole number

6 <sup>a</sup>Unless otherwise stated

7 <sup>b</sup>Demographic data is based on participants who completed the first survey

8 <sup>c</sup>These studies collected data from other groups who were not included in this review as they did not meet eligibility criteria. This included people having invasive procedures such as fine needle  
9 aspirate or open surgical biopsy[16, 33], people with abnormal screening results[18, 26, 29] and people who did not have a scan[18-20, 43]

10 <sup>d</sup>Demographics based on the entire population even if not all participants were eligible for this review.

11 <sup>e</sup>Four paediatric participants were included in this study.  
12  
13  
14  
15  
16  
17  
18  
19  
20  
21  
22  
23  
24  
25  
26  
27  
28  
29  
30  
31  
32  
33  
34  
35  
36  
37  
38  
39  
40  
41  
42  
43

For peer review only

1  
2  
3 Twenty-one studies were conducted in people having scans for screening[15, 16, 18, 20, 21, 24-27, 29-  
4 32, 35, 38, 43, 45, 54, 57, 58, 61]. In the remaining studies, reasons for scanning included diagnosis[23,  
5 48], staging[34, 44, 52], monitoring[49, 55, 60], surveillance to detect recurrence[28, 37, 56] or a  
6 combination of reasons in people with known or suspected cancers (17 studies[17, 39, 41, 46, 47, 50, 51,  
7 53, 59]). Five studies permitted scans for both screening and non-screening reasons (namely,  
8 diagnosis[22, 36, 40] or surveillance[19, 42])  
9  
10

11 The mean age of participants, reported by 33 studies, was 56.9 years (range 38 to 66 years)[20, 21, 25,  
12 26, 28-33, 35, 36, 39, 41-48, 50-61]. The majority of participants were women (87%)[15, 16, 18-61].  
13 When studies involving scans for breast cancer were excluded, there were similar proportions of men  
14 and women (women 49%, men 51%)[15, 27, 28, 30, 32-35, 37, 39, 41, 44, 46, 47, 49-55, 57, 59-61].  
15 There was variation in the reporting and proportion of participants who were married (22 studies, range  
16 34% to 97%[20, 21, 24-26, 29, 31, 32, 34-38, 41, 45-49, 54, 56, 58]), who received at least secondary  
17 education (29 studies, range 10% to 99%[20-22, 24-29, 31, 32, 34, 36, 37, 41-43, 45-47, 49-51, 54, 55,  
18 57-60]) and who were attending their first scan (18 studies, range 0% to 100%[17, 21, 24, 27, 29, 32, 36,  
19 38, 39, 41, 45, 46, 48, 50, 51, 55, 56, 59]).  
20  
21  
22  
23  
24  
25

#### 26 Intervention studies

27 There were ten intervention studies (**Table 2**) involving 1,854 people[62-71]. This included people having  
28 scans for breast cancer (6 studies,  $n=1,449$  people[62-65, 69, 70]) and lung cancer (1 study,  $n=16$   
29 people[68]). Scans included mammogram (5 studies[62-64, 69, 70]), positron emission tomography  
30 (PET) with computed tomography (CT; 3 studies[66, 67, 71]), magnetic resonance imaging (MRI)[65],  
31 CT[68] and ultrasound[70] (1 study each). Four studies involved scans for screening[63, 64, 68, 69], one  
32 for diagnosis[65], three for any reason in people with known or suspected cancers[66, 67, 71], and two  
33 where scans for screening, surveillance and/or diagnosis were permitted[62, 70].  
34  
35

36 The mean age of participants was reported by five studies and ranged from 47 to 65 years[63, 65, 68, 69,  
37 71]. The majority were women (94%[62-66, 68-71]). There was variation in the reporting and proportion  
38 of participants who were married (2 studies, 73% and 75%[64, 65]), received at least secondary  
39 education (6 studies, range 28 to 100%[62-65, 68, 69]), and participants attending their first scan (5  
40 studies, range 4% to 54%[62-64, 66, 71]).  
41  
42

43 Eight studies allocated participants to an intervention or control group[63-69, 71], one study compared  
44 two interventions[62] and one study delivered the intervention to all participants[70]. Two interventions  
45 were multifaceted[64, 65]. Types of interventions included: relaxation, distraction, and/or meditation (6  
46 studies[62, 63, 66, 69-71]); education (4 studies[62, 64, 65, 68]); emotional or psychosocial support (2  
47 studies[64, 65]); or, adjustments to routine logistics of the scan (1 study[67]).  
48  
49  
50  
51  
52  
53  
54  
55  
56  
57  
58



**Table 2.** Demographics and study details for the 10 intervention studies to reduce scanxiety

| First author        | Year | n   | Country of study | Cancer type | Age (years) (Mean <sup>a</sup> )                                   | Female (%) | Married or de facto (%) | At least secondary education (%) | First scan (%) | Scan type              | Reason for scan                      | Allocation                  | Intervention and control groups                                           |
|---------------------|------|-----|------------------|-------------|--------------------------------------------------------------------|------------|-------------------------|----------------------------------|----------------|------------------------|--------------------------------------|-----------------------------|---------------------------------------------------------------------------|
| Mainiero[62]        | 2001 | 613 | USA              | Breast      | < 40: 8%<br>50 to 50: 39%<br>50 to 60: 28%<br>>70: 9%              | 100        | NR                      | 95                               | 7              | Mammogram              | Screening or surveillance            | Consecutive <sup>b</sup>    | Educational or entertaining video in waiting room                         |
| Domar[63]           | 2005 | 143 | USA              | Breast      | 52                                                                 | 100        | NR                      | 81                               | 8              | Mammogram              | Screening                            | Randomised                  | Relaxation, music or blank audiotape in waiting room and during scan      |
| Fernandez-Feito[64] | 2005 | 436 | Spain            | Breast      | 50 to 54: 24%<br>55 to 59: 30%<br>60 to 64: 23%<br>65 to 69: 22%   | 100        | 73                      | 28                               | 4              | Mammogram              | Screening                            | Randomised                  | Pre-scan nursing intervention or usual care                               |
| Caruso[65]          | 2006 | 44  | Italy            | Breast      | 47                                                                 | 100        | 75                      | 89                               | NR             | MRI                    | Diagnosis                            | Randomised                  | Pre-scan informative-emotive psychological support or routine information |
| Vogel[66]           | 2012 | 101 | Netherlands      | Any         | Median: 58                                                         | 51         | NR                      | NR                               | 41             | PET/CT                 | Any (except screening)               | Randomised                  | Audiovisual installation or usual care during FDG uptake                  |
| Acuff[67]           | 2014 | 180 | USA              | Any         | NR                                                                 | NR         | NR                      | NR                               | NR             | PET/CT                 | Any (except screening)               | Unclear                     | Hand-held communication device or usual care during scan                  |
| Raz[68]             | 2014 | 16  | USA              | Lung        | 65                                                                 | 75         | NR                      | 100                              | NR             | CT                     | Screening                            | Sequential <sup>c</sup>     | Pre-scan multimedia education or usual care                               |
| Zavotsky[69]        | 2014 | 100 | USA              | Breast      | 54                                                                 | 100        | NR                      | 98                               | NR             | Mammogram              | Screening                            | Non-randomised <sup>d</sup> | Music or no music during scan                                             |
| Ashton[70]          | 2019 | 113 | USA              | Breast      | 18 to 39: 3.6%<br>40 to 59: 51.8%<br>60 to 79: 39.3%<br>> 80: 5.4% | 100        | NR                      | NR                               | NR             | Mammogram ± ultrasound | Screening, surveillance or diagnosis | NA <sup>e</sup>             | Shoulder & neck massage ± hand massage                                    |
| Lorca[71]           | 2019 | 108 | Spain            | Any         | 59                                                                 | 57         | NR                      | NR                               | 54             | PET/CT                 | Any (except screening)               | Randomised                  | Mindfulness meditation or usual care during FDG uptake                    |

USA United States of America, NR not reported, MRI magnetic resonance imaging, PET positron emission tomography, CT computed tomography, FDG fluorodeoxyglucose

All percentages were rounded to the nearest whole number

<sup>a</sup>Unless otherwise stated

<sup>b</sup>Each intervention was administered during one half of the study period

<sup>c</sup>Participants were enrolled into the control arm first, followed by the intervention arm

<sup>d</sup>Participants attending on Mondays, Wednesdays and Fridays were allocated to the intervention arm, and participants attending on Tuesdays and Thursdays were allocated to the control arm

<sup>e</sup>All participants received the intervention

## Scanxiety measurement

Anxiety measurements varied across the studies, with different measurement tools, variants of the same tool, and different range and thresholds applied to tools.

### Observational studies

The 47 observational studies (**Table 3**) used a total of 81 measures of anxiety, with 30 studies using one measure only[15-19, 21, 22, 25-28, 30, 33, 34, 36, 39, 40, 43, 44, 46, 48-51, 53, 55-57, 59, 61], and 17 studies using at least two measures[20, 23, 24, 29, 31, 32, 35, 37, 38, 41, 42, 45, 47, 52, 54, 58, 60].

The most common measures used were: purpose-designed Likert scales (17 studies); the State-Trait Anxiety Inventory (STAI) (14 studies); the anxiety subscale of the Hospital Anxiety and Depression Scale (HADS) (9 studies); the Impact of Event Scale (IES) (6 studies); the Psychological Consequences Questionnaire (PCQ) (3 studies), the Cancer Worry Scale (3 studies), and; the Perceived Stress Scale (2 studies). There were 17 measures used by one study only[15, 20, 22, 26, 31, 32, 35, 52, 54, 56, 58, 60].

Likert scales were varied, with a numerical lower range limit of 0 or 1, and an upper range limit between 3 and 12[17, 20, 24, 25, 33, 40, 44, 46, 48, 50, 52, 53]. Seven studies used a descriptive range[21, 25, 27, 28, 33, 34, 55]. Two studies used both a numerical and a descriptive range[25, 33].

The STAI comprises State and Trait Anxiety subscales with a possible subscale range of 20 to 80. It has no validated anxiety threshold and is usually calculated as a sum of 4-point response options[72]. Included studies used and reported the STAI as a total score[37, 39], using one or both subscales[20, 23, 36, 37, 41, 42, 47, 51, 57, 59], or as a variant (e.g. STAI-6[32, 38, 58]). There were different ranges: none reported[47, 57]; no reported lower limit[41]; no reported upper limit[36]; 0 to 60[39, 51], or; based on a mean of individual item scores[20]. Some studies pre-specified an anxiety threshold of 39[57], 40[37, 41], 46[42], calculated based on the relationship between the anxiety and trait subscales[39], or based on investigator-determined categories[36]. One study used a different method to calculate scores (ie subtracting the points of reversed statements from direct statements, which were valued at 1, 2, 3 and 20, and then added to a constant of 50[36]).

The HADS Anxiety subscale has a range of 0 to 21 and a validated anxiety threshold of 11[73]. One study reported a range of 0 to 14[38], one study reported anxiety categories rather than a threshold[60], two studies reported an anxiety threshold of 8[41, 43] and one study reported an anxiety threshold of 10 (though there was overlap the 'tendency to anxiety' and 'anxiety' categories, classified as scores of 8 to 10 and 10 or more, respectively)[47].

The IES was used in its original form[30, 32, 38, 42, 58] or as a variant (IES-6[49]), and was reported as a total score[30, 32, 38, 49] or as Intrusion and Avoidance subscale scores[42, 58]. The two studies using subscale scores reported threshold levels of 20 or 21[42] and 8.5[58]. When using the PCQ, researchers used either the Emotional subscale[18] or the Negative Consequences subscale[24, 29]. The Cancer Worry Scale and the Perceived Stress Scale were used in original[45, 61] or variant[29, 54, 58] forms. The Symptom Checklist-90-Revised score could not be interpreted because the authors did not report a range[31], and a raw score or a transformed score could have been used[74].

**Table 3.** Prevalence and severity of scanxiety

| Author               | Year     | Measurement of scanxiety                                 |                                                 |                                                                   | Results of scanxiety measurement         |                                       |                                                           |
|----------------------|----------|----------------------------------------------------------|-------------------------------------------------|-------------------------------------------------------------------|------------------------------------------|---------------------------------------|-----------------------------------------------------------|
|                      |          | Name of tool                                             | Range of tool (Anxiety threshold <sup>a</sup> ) | Timing of assessment                                              | Prevalence (%)                           | Severity (Mean ±SD <sup>b</sup> )     | Pre- & post-scan comparison                               |
| Andolf[15]           | 1990     | Visual analogue scale                                    | 0-100 (NA)                                      | Post-scan: 1-3 years                                              | 81                                       | Median 3.5 (range 0-100)              | NA                                                        |
| Bull[16]             | 1991     | HADS: Anxiety subscale                                   | 0-21 (≥11) <sup>c</sup>                         | Pre-scan: specific timing NR                                      | 4.9                                      | 4.97 (range 0-20)                     | Less severe post-scan scanxiety, p<0.001                  |
|                      |          |                                                          |                                                 | Post-scan: post-result, specific timing NR                        | 4                                        | 4.43 (range 0-17)                     |                                                           |
| Peteet[17]           | 1992     | 10-point Likert scale                                    | 1-10 (NA)                                       | Post-scan: specific timing NR                                     | NR                                       | First scan 5.5, Recent scan 3.5       | NA                                                        |
| Cockburn[18]         | 1994     | PCQ: Emotional subscale                                  | 0-15 (NA)                                       | Pre-scan: day of scan                                             | NR                                       | <2                                    | No difference                                             |
|                      |          |                                                          |                                                 | Post-scan: pre-results, 1-week post-result & at 8 months          | NR                                       | <2                                    |                                                           |
| Ellman[19]           | 1995     | HADS: Anxiety subscale                                   | 0-21 (≥11)                                      | Pre-scan: day of scan                                             | 6                                        | NR                                    | NA                                                        |
| Sutton[20]           | 1995     | STAI: State Anxiety subscale                             | 1-4 (NA)                                        | Pre-scan: at invitation to screening, specific timing NR          | NR                                       | Between 1.65 and 1.95                 | No significant differences scanxiety at any time point    |
|                      |          |                                                          |                                                 | Peri-scan: day of scan                                            | NR                                       |                                       |                                                           |
|                      |          |                                                          |                                                 | Post-scan: 9 months                                               | NR                                       |                                       |                                                           |
|                      |          | STAI: Trait Anxiety subscale                             | 1-4 (NA)                                        | Pre-scan: at invitation to screening, specific timing NR          | NR                                       | Between 1.65 and 1.95                 | No significant differences in scanxiety at any time point |
|                      |          |                                                          |                                                 | Peri-scan: day of scan                                            | NR                                       |                                       |                                                           |
|                      |          |                                                          |                                                 | Post-scan: 9 months                                               | NR                                       |                                       |                                                           |
|                      |          | GHQ: Anxiety subscale                                    | 0-3 (NA)                                        | Pre-scan: at invitation to screening, specific timing NR          | NR                                       | <1                                    | Less severe post-scan scanxiety, p<0.001                  |
|                      |          |                                                          |                                                 | Post-scan: 9 months                                               | NR                                       | <1                                    |                                                           |
| 3-point Likert scale | 1-3 (NA) | Pre-scan: at invitation to screening, specific timing NR | NR                                              | <2                                                                | Less severe post-scan scanxiety, p<0.001 |                                       |                                                           |
|                      |          | Post-scan: 9 months                                      | NR                                              | <2                                                                |                                          |                                       |                                                           |
| Bakker[21]           | 1998     | 5-point Likert scale                                     | Descriptive range (NA)                          | Post-scan: immediate & at 3 weeks                                 | 39-40                                    | Somewhat, very or extremely: 9 to 15% | NA                                                        |
| Gupta[22]            | 1999     | HSCL-25                                                  | 0-3 (NA)                                        | Post-scan: specific timing NR                                     | 40                                       | Moderate to severe: 25%               | NA                                                        |
| Hafslund[23]         | 2000     | STAI: State Anxiety subscale                             | 20-80 (NA)                                      | Pre-scan: day of scan                                             | NR                                       | 35.5 ±11.0                            | No statistical comparison reported                        |
|                      |          |                                                          |                                                 | Post-scan: day of scan                                            | NR                                       | 32.1 ±10.9                            |                                                           |
|                      |          | STAI: Trait Anxiety subscale                             | 20-80 (NA)                                      | Pre-scan: day of scan                                             | NR                                       | 35.9 ±9.1                             | No statistical comparison reported                        |
|                      |          |                                                          |                                                 | Post-scan: day of scan                                            | NR                                       | NR                                    |                                                           |
| Meystre-Agostoni[24] | 2001     | PCQ: Negative consequences subscale                      | 0-36 (NA)                                       | Pre-scan: day of scan                                             | NR                                       | <1                                    | No statistical comparison reported                        |
|                      |          |                                                          |                                                 | Post-scan: pre- result, 2 weeks post-result & 8 weeks post-result | NR                                       | <2                                    |                                                           |
|                      |          | 6-point Likert scale                                     | 0-5 (NA)                                        | Pre-scan: immediate                                               | 26                                       | <1                                    |                                                           |
|                      |          |                                                          |                                                 | Post-scan: pre-result, 2 weeks post-result & 8 weeks post-result  | NR                                       | <1                                    |                                                           |

|                   |      |                                                 |                        |                                                        |                               |                                                     |                                                                                    |
|-------------------|------|-------------------------------------------------|------------------------|--------------------------------------------------------|-------------------------------|-----------------------------------------------------|------------------------------------------------------------------------------------|
| Drossaert[25]     | 2002 | Composite 7-item score of 4-point Likert scales | 1-4 (NA)               | Baseline: 8 weeks post-first scan                      | NR                            | 1.6                                                 | No statistical comparison reported                                                 |
|                   |      |                                                 |                        | Pre-scan: 6 weeks (second & third scans)               | NR                            | 1.6 to 1.7                                          |                                                                                    |
|                   |      |                                                 |                        | Post-scan: 6 weeks (second & third scans)              | NR                            | 1.5                                                 |                                                                                    |
|                   |      |                                                 | Descriptive range (NA) | Baseline: 8 weeks post-first scan                      | NR                            | Moderate to severe: 10%                             | NA                                                                                 |
| Sandin[26]        | 2002 | HSCL-90-R: Anxiety subscale                     | 0-4 (NA)               | Pre-scan: day of scan                                  | NR                            | 0.41 ±0.33                                          | No statistical comparison reported                                                 |
|                   |      |                                                 |                        | Post-scan: 2 weeks                                     | NR                            | 0.28 ±0.30                                          |                                                                                    |
| Brunton[27]       | 2005 | 4-point Likert scale, 3 items                   | Descriptive range (NA) | Post-scan: within 4 years                              | 56-77                         | Quite or very: 11 to 28%                            | NA                                                                                 |
| Geurts[28]        | 2006 | 4-point Likert scale                            | 1-4 (NA)               | Pre-scan: specific timing NR                           | 61                            | Moderate to severe: 21%                             | NA                                                                                 |
| Tyndel[29]        | 2007 | PCQ: Negative consequences subscale             | 0-36 (NA)              | Pre-scan: 1 month                                      | NR                            | 5.1 ±6.7                                            | Less severe post-scan scanxiety, p=0.000                                           |
|                   |      |                                                 |                        | Post-scan: 1-month post- result & 6-months post-result | NR                            | 3.8 ±6.0 to 4.2 ±6.2                                |                                                                                    |
|                   |      | Cancer Worry Scale - Revised                    | 6-24 (NA)              | Pre-scan: 1 month                                      | NR                            | 11.0 ±2.9                                           | Less severe post-scan scanxiety, p=0.000                                           |
|                   |      |                                                 |                        | Post-scan: 1-month post- result & 6-months post-result | NR                            | 10.1 ±2.5 to 10.6 ±2.6                              |                                                                                    |
| Bunge[30]         | 2008 | IES in low affective risk people                | 0-75 (NA)              | Pre-scan: 1 day                                        | NR                            | 5.6 ±7.9                                            | Less severe post-scan scanxiety in both low and high affective risk groups, p<0.05 |
|                   |      |                                                 |                        | Post-scan: 6 months                                    | NR                            | 4.3 ±7.2                                            |                                                                                    |
|                   |      | IES in high affective risk people               | 0-75 (NA)              | Pre-scan: 1 day                                        | NR                            | 14.7 ±14.4                                          |                                                                                    |
|                   |      |                                                 |                        | Post-scan: 6 months                                    | NR                            | 10.3 ±11.0                                          |                                                                                    |
| Brown Sofair[31]  | 2008 | Penn State Worry Questionnaire                  | 16-80 (60)             | Pre-scan: within 1 month                               | NR                            | 50.18 (range 40-60)                                 | No statistical comparison reported                                                 |
|                   |      |                                                 |                        | Post-scan: day of scan (post-result)                   | NR                            | NR                                                  |                                                                                    |
|                   |      | SCL-90-R: Anxiety subscale                      | NR (NA)                | Pre-scan: within 1 month                               | NR                            | 48.75                                               | No difference                                                                      |
|                   |      |                                                 |                        | Post-scan: day of scan (post-result)                   | NR                            | 42.07                                               |                                                                                    |
|                   |      | Individualized Questionnaire: Anxiety response  | 1-3 (2)                | Pre-scan: within 1 month                               | 35                            | NR                                                  | No statistical comparison reported                                                 |
|                   |      |                                                 |                        | Post-scan: day of scan (post-result)                   | 24                            | NR                                                  |                                                                                    |
| van den Bergh[32] | 2008 | STAI-6                                          | 20-80 (NA)             | Pre-scan: 1 day                                        | NR                            | 34.1 ±7.7                                           | Less severe post-scan scanxiety, p<0.01                                            |
|                   |      |                                                 |                        | Post-scan: within 1 week & at 6 months                 | NR                            | 32.7 ±8.4 to 34.3 ±9.1                              |                                                                                    |
|                   |      | IES                                             | 0-75 (NA)              | Pre-scan: 1 day                                        | NR                            | 6.9 ±9.6                                            | Less severe post-scan scanxiety, p<0.01                                            |
|                   |      |                                                 |                        | Post-scan: within 1 week & at 6 months                 | NR                            | 5.1 ±8.0 to 5.6 ±8.8                                |                                                                                    |
|                   |      | EuroQol questionnaire: Anxiety subscale         | 1-3 (NA)               | Pre-scan: 1 day                                        | 23                            | NR                                                  | No statistical comparison reported                                                 |
|                   |      |                                                 |                        | Post-scan: 6 months                                    | NR                            | NR                                                  |                                                                                    |
| Westerterp[33]    | 2008 | 5-point Likert scale                            | 1-5 (NA)               | Post-scan (after both scans): 2 weeks                  | NR                            | CT 1.2 ±0.6, PET 1.4 ±1.0                           | NA                                                                                 |
|                   |      |                                                 | Descriptive range (NA) | Post-scan (after both scans): 2 weeks                  | CT 13, PET 23                 | Moderate to severe: CT 4%, PET 10%                  | NA                                                                                 |
| Bastiaannet[34]   | 2009 | 5-point Likert scale                            | 1-5 (NA)               | Post-scan: 2-6 weeks after lymph node dissection       | Chest x-ray 20, CT 31, PET 36 | Moderate to severe: Chest X-ray 13%, CT 5%, PET: 9% | NA                                                                                 |
| Vierikko[35]      | 2009 | Health anxiety inventory                        | 0-24 (NA)              | Pre-scan: specific timing NR                           | NR                            | 6.7 ±4.7                                            | Less severe post-                                                                  |

|                |      |                                    |                                                                   |                                                      |                      |                                                              |                                                                          |
|----------------|------|------------------------------------|-------------------------------------------------------------------|------------------------------------------------------|----------------------|--------------------------------------------------------------|--------------------------------------------------------------------------|
|                |      |                                    |                                                                   | Post-scan: 1 year                                    | NR                   | 5.8 ±4.6                                                     | scan scanxiety, p<0.001                                                  |
|                |      | Worry about lung cancer            | 0-8 (NA)                                                          | Pre-scan: specific timing NR                         | NR                   | 3.0 ±2.4                                                     | No difference                                                            |
|                |      |                                    |                                                                   | Post-scan: 1 year                                    | NR                   | 3.1 ±2.3                                                     |                                                                          |
| Bolukbas[36]   | 2010 | STAI: State Anxiety subscale       | 0-NR (20-39 mild, 40-59 moderate, 60-79 severe, ≥ 80 help needed) | Peri-scan: specific timing NR                        | NR                   | 46.2 ±4.9                                                    | NA                                                                       |
| Thompson[37]   | 2010 | STAI                               | 40-160 (NA)                                                       | Post-scan: specific timing NR                        | 37                   | 65.8 ±21.0                                                   | NA                                                                       |
|                |      | STAI: State Anxiety subscale       | 20-80 (≥40)                                                       | Post-scan: specific timing NR                        | NR                   | 30.4 ±10.9                                                   | NA                                                                       |
|                |      | STAI: Trait Anxiety subscale       | 20-80 (≥40)                                                       | Post-scan: specific timing NR                        | NR                   | 35.4 ±11.3                                                   | NA                                                                       |
| Hutton[38]     | 2011 | HADS: Anxiety subscale             | 0-14 (≥11)                                                        | Baseline: 4 weeks pre-first scan                     | 20                   | 6.9 ±4.2                                                     | No difference                                                            |
|                |      |                                    |                                                                   | Pre-scan: day of each scan (for 5 scans)             | MRI 17, Mammogram 20 | MRI 5.2 ±4.0 to 6.5 ±4.2, Mammogram 5.0 ±3.9 to 6.5 ±4.1     |                                                                          |
|                |      |                                    |                                                                   | Post-scan: 6 weeks (for 5 scans)                     | 10 to 13             | 5.1 ±4.2 to 5.9 ±4.1                                         |                                                                          |
|                |      | STAI-6                             | 20-80 (NA)                                                        | Pre-scan: day of scan (for 5 scans)                  | NR                   | MRI 10.8 ±3.8 to 12.1 ±4.0, Mammogram 10.1 ±3.9 to 11.3 ±4.1 | Less severe post-scan scanxiety for MRI (p<0.0005) & mammogram (p=0.002) |
|                |      |                                    |                                                                   | Post-scan: day of scan (for 5 scans)                 | NR                   | MRI 9.6 ±3.2 to 10.7 ±3.8, Mammogram 9.7 ±3.1 to 10.5 ±3.9   |                                                                          |
|                |      | IES                                | 0-75 (NA)                                                         | Post-scan: 6 weeks (for 5 scans)                     | NR                   | MRI 17.8 ±5.8 to 19.3 ±7.0, Mammogram 17.2 ±4.4 to 18.6 ±5.2 | NA                                                                       |
| Pifarre[39]    | 2011 | STAI                               | 0-60 for each subscale (state more than 10 than trait)            | Pre-scan: day of scan                                | 68                   | NR                                                           | NA                                                                       |
| Steinemann[40] | 2011 | 7-point Likert scale               | 1-7 (NA)                                                          | Pre-scan: day of scan                                | NR                   | 4.1                                                          | NA                                                                       |
| Yu[41]         | 2011 | HADS: Anxiety subscale             | 0-21 (≥8)                                                         | Pre-scan: day of scan                                | 38                   | NR                                                           | NA                                                                       |
|                |      | STAI: State Anxiety subscale       | NR-80 (≥40)                                                       | Pre-scan: day of scan                                | 46                   | 39.4 ±12.2                                                   | NA                                                                       |
|                |      | STAI: Trait Anxiety subscale       | NR-80 (≥40)                                                       | Pre-scan: day of scan                                | 46                   | 39.9 ±12.2                                                   | NA                                                                       |
|                |      | Dichotomous reporting <sup>d</sup> | Yes/No (NA)                                                       | Pre-scan: day of scan                                | 41                   | NR                                                           | NA                                                                       |
| Bredart[42]    | 2012 | STAI: State Anxiety subscale       | 20-80 (≥46)                                                       | Pre-scan: 1 week                                     | NR                   | MRI 42.1, Mammogram 41.1                                     | No statistical comparison reported                                       |
|                |      |                                    |                                                                   | Post-scan: day of scan & between 15 days to 3 months | NR                   | MRI 34.9, 40.8, Mammogram 34.3, 38.8                         |                                                                          |
|                |      | IES: Intrusion subscale            | 0-35 (≥20)                                                        | Pre-scan: 1 week                                     | NR                   | MRI 8.9, Mammogram 8.4                                       | No statistical comparison reported                                       |
|                |      |                                    |                                                                   | Post-scan: day of scan & between 15 days to 3 months | NR                   | MRI 8.5, Mammogram 7.7                                       |                                                                          |

|                  |      |                                        |                        |                                                          |                                           |                                                                  |                                                                           |
|------------------|------|----------------------------------------|------------------------|----------------------------------------------------------|-------------------------------------------|------------------------------------------------------------------|---------------------------------------------------------------------------|
|                  |      | IES: Avoidance subscale                | 0-40 (≥21)             | Pre-scan: 1 week                                         | NR                                        | MRI 12.1, Mammogram 9.8                                          | No statistical comparison reported                                        |
|                  |      |                                        |                        | Post-scan: day of scan & between 15 days to 3 months     | NR                                        | MRI 11.8, Mammogram 8.9                                          |                                                                           |
| Hafslund[43]     | 2012 | HADS: Anxiety subscale                 | 0-21 (≥8)              | Pre-scan: within 2 weeks                                 | 15                                        | 4.1 ±3.3                                                         | NA                                                                        |
| Adams[44]        | 2014 | 4-point Likert scale                   | 1-4 (NA)               | Post-scan: day of scan (after each scan)                 | NR                                        | MRI 1.5 ±0.7, CT 1.8 ±0.8                                        | NA                                                                        |
| Baena-Canada[45] | 2014 | HADS: Anxiety subscale                 | 0-21 (≥11)             | Post-scan: specific timing NR                            | 4                                         | 1.86 ±3.26                                                       | NA                                                                        |
|                  |      | Cancer Worry Scale                     | 6-24 (NA)              | Post-scan: specific timing NR                            | NR                                        | 9.4 ±3.0                                                         | NA                                                                        |
| Andersson[46]    | 2015 | Sum of 3 items on 5-point Likert scale | 0-12 (NA)              | Post-scan: within four weeks                             | NR                                        | 4 (range 0-10)                                                   | NA                                                                        |
| Elboga[47]       | 2015 | HADS: Anxiety subscale                 | 0-21 (≥10)             | Pre-scan: day of scan                                    | NR                                        | 9.2 ±3.8                                                         | NA                                                                        |
|                  |      | STAI: State Anxiety subscale           | NR (NA)                | Pre-scan: day of scan                                    | NR                                        | 40.4 ±8.5                                                        | NA                                                                        |
|                  |      | STAI: Trait Anxiety subscale           | NR (NA)                | Pre-scan: day of scan                                    | NR                                        | 46.6 ±7.8                                                        | NA                                                                        |
| Hobbs[48]        | 2015 | 5-point Likert scale                   | 1-5 (NA)               | Post-scan (after both scans), specific timing NR         | Mammogram 17, MRI 44                      | NR                                                               | NA                                                                        |
| Baum[49]         | 2016 | IES-6                                  | 0-24 (NA)              | Post-scan: specific timing NR                            | 83                                        | 6.4 ±5.3                                                         | NA                                                                        |
| Abreu[50]        | 2017 | 10-point Likert scale                  | 1-10 (NA)              | Pre-scan: day of scan                                    | NR                                        | 6.4 ±2.7                                                         | Less severe post-scan scanxiety, p=0.000                                  |
|                  |      |                                        |                        | Post-scan: day of scan                                   | NR                                        | 5.7 ±2.6                                                         |                                                                           |
| Grilo[51]        | 2017 | STAI: State Anxiety subscale           | 0-60 (NA)              | Pre-scan: day of scan                                    | NR                                        | 31.1 ±5.2                                                        | More severe post-scan scanxiety, p=0.000                                  |
|                  |      |                                        |                        | Post-scan: day of scan                                   | NR                                        | 33.9 ±4                                                          |                                                                           |
| Evans[52]        | 2018 | GHQ-12                                 | 0-12 (≥4)              | Peri-scans: specific timing NR                           | 42                                        | NR                                                               | NA                                                                        |
|                  |      | 7-point Likert scale                   | 1-7 (NA)               | Post-scan: 1 month                                       | NR                                        | MRI 2.5 ±1.3, CT or PET/CT 2.2 ±1.2                              | NA                                                                        |
| Goense[53]       | 2018 | 5-point Likert scale                   | 1-5 (NA)               | Post-scan (after both scans): day of scan                | NR                                        | MRI 1.0 ±0.2, PET 1.0 ±0.2                                       | NA                                                                        |
| Hall[54]         | 2018 | Generalized Anxiety Disorder 2-item    | 0-6 (≥3)               | Peri-scan: specific timing NR                            | 26                                        | 1.62 ±1.78                                                       | NA                                                                        |
|                  |      | Perceived Stress Scale 4               | 0-16 (NA)              | Peri-scan: specific timing NR                            | NR                                        | 5.14 ±3.35                                                       | NA                                                                        |
| Derry[55]        | 2019 | 4-point Likert scale                   | Descriptive range (NA) | Peri-scan: pre-result                                    | NR                                        | 'A great deal' or 'completely': 23%                              | NA                                                                        |
| Soriano[56]      | 2019 | PROMIS Anxiety Short Form              | 1-5 (NA)               | Pre-scan: two weeks                                      | NR                                        | 1.55 ±0.64                                                       | NA                                                                        |
| Taghizadeh[57]   | 2019 | STAI: State Anxiety subscale           | NR (39)                | Baseline                                                 | NR                                        | 30.9                                                             | More severe post-scan scanxiety, p<0.001                                  |
|                  |      |                                        |                        | Post-scan: one-month post-result & at 12 months          | NR                                        | 33.1, 31.7                                                       |                                                                           |
| Bancroft[58]     | 2020 | HADS: Anxiety subscale                 | 0-21 (11)              | Baseline                                                 | Carriers <sup>e</sup> : 14<br>Controls: 7 | Carriers: 6.2 ±3.9<br>Controls: 4.9 ±3.3                         | No difference in prevalence<br>Less severe post-scan in carriers (p=0.04) |
|                  |      |                                        |                        | Post-scan: pre-results, at 12 weeks, 26 weeks & 52 weeks | Carriers: 5 to 14<br>Controls: 2 to 7     | Carriers: 5.3 ±3.9 to 5.9 ±4.1<br>Controls: 4.1 ±3.1 to 4.6 ±3.3 |                                                                           |

1  
2  
3  
4  
5  
6  
7  
8  
9  
10  
11  
12  
13  
14  
15  
16  
17  
18  
19  
20  
21  
22  
23  
24  
25  
26  
27  
28  
29  
30  
31  
32  
33  
34  
35  
36  
37  
38  
39  
40  
41  
42  
43  
44  
45  
46  
47

|              |      |                                                          |                                                        |                                                                  |                                          |                                                                      |                                                                             |
|--------------|------|----------------------------------------------------------|--------------------------------------------------------|------------------------------------------------------------------|------------------------------------------|----------------------------------------------------------------------|-----------------------------------------------------------------------------|
|              |      | Cancer Worry Scale – Revised                             | 8-32 (NA)                                              | Baseline                                                         | NR                                       | Carriers: 14.4 ±3.6<br>Controls: 12.2 ±1.7                           | No difference                                                               |
|              |      |                                                          |                                                        | Post-scan: at 12 weeks, 26 weeks & 52 weeks                      | NR                                       | Carriers: 13.6 ±4.4 to 14.7 ±4.2<br>Controls: 11.9 ±1.4 to 12.1 ±1.9 |                                                                             |
|              |      | IES-cancer: Intrusion subscale                           | 0-35 (8.5)                                             | Post-scan: pre-results, at 12 weeks, 26 weeks & 52 weeks         | Carriers: 35 to 58<br>Controls: 5 to 13  | Carriers: 8.3 ±9.1 to 11.4 ±9.1<br>Controls: 1.7 ±3.5 to 3.0 ±4.9    | NA                                                                          |
|              |      | IES-cancer: Avoidance subscale                           | 0-40 (8.5)                                             | Post-scan: pre-results, at 12 weeks, 26 weeks & 52 weeks         | Carriers: 55 to 64<br>Controls: 12 to 37 | Carriers: 9.9 ±9.0 to 13.3 ±10.5<br>Controls: 2.6 ±4.6 to 7.0 ±8.2   | NA                                                                          |
|              |      | IES-MRI: Intrusion subscale                              | 0-35 (8.5)                                             | Post-scan: at 12 weeks, 26 weeks & 52 weeks                      | Carriers: 4 to 7<br>Controls: 0 to 3     | Carriers: 1.2 ±3.2 to 3.1 ±8.8<br>Controls: 0.1 ±0.3 to 0.5 ±1.8     | NA                                                                          |
|              |      | IES-MRI: Avoidance subscale                              | 0-40 (8.5)                                             | Post-scan: at 12 weeks, 26 weeks & 52 weeks                      | Carriers: 14<br>Controls: 8              | Carriers: 1.8 ±3.4 to 4.1 ±9.3<br>Controls: 0.8 ±1.4 to 2.8 ± 1.8    | NA                                                                          |
|              |      | STAI-6                                                   | 6-24 (NA)                                              | Pre-scan: day of scan                                            | NR                                       | Carriers: 7.2 ±3.3<br>Controls: 7.3 ±3.2                             | NA                                                                          |
|              |      | Health Questionnaire                                     | 0-14 (NA)                                              | Baseline                                                         | NR                                       | Carriers: 7.0 ±2.6<br>Controls: 6.8 ±2.2                             | No difference                                                               |
|              |      | Post-scan: pre-results, at 12 weeks, 26 weeks & 52 weeks | NR                                                     | Carriers: 7.1 ±2.5 to 8.1 ±2.8<br>Controls: 6.9 ±2.2 to 7.7 ±2.1 |                                          |                                                                      |                                                                             |
| Grilo[59]    | 2020 | STAI: State Anxiety subscale                             | 20-80 (NA)                                             | Pre-scan: day of scan                                            | NR                                       | Bone scan: 51.75 ±3.77<br>PET/CT: 44.76 ±10.0                        | Less severe post-scan scanxiety for both: Bone scan. p=0.02 PET/CT, p<0.001 |
|              |      |                                                          |                                                        | Post-scan: day of scan                                           | NR                                       | Bone scan: 36.70 ±12.12<br>PET/CT: 38.82 ±11.33                      |                                                                             |
| Morreale[60] | 2020 | Distress thermometer                                     | 0-10 (4)                                               | Peri-scan: day of scan                                           | NR                                       | 3.73 ±2.60                                                           | No statistical comparison                                                   |
|              |      |                                                          |                                                        | Post-scan: one-week post-result                                  | NR                                       | 3.91 ±2.69                                                           |                                                                             |
|              |      | HADS: Anxiety subscale                                   | 0-21 (0-7 none, 8-10 mild, 11-14 moderate, 15-21 high) | Peri-scan: day of scan                                           | NR                                       | 6.12 ±3.98                                                           | No statistical comparison                                                   |
|              |      |                                                          |                                                        | Post-scan: one-week post-result                                  | NR                                       | 5.32 ±4.31                                                           |                                                                             |
| Paiella[61]  | 2020 | Perceived Stress Scale                                   | 0-40 (15-18 moderate, ≥ 19 high)                       | Post-scan: pre-result                                            | NR                                       | 14.8                                                                 | NA                                                                          |

SD standard deviation NA not applicable, NR not reported, HADS Hospital Anxiety and Depression Scale, PCQ Psychological Consequences Questionnaire, STAI State-Trait Anxiety Inventory, GHQ General Health Questionnaire, HSCL Hopkins Symptom Checklist, IES Impact of Event Scale, SCL-90-R Symptom Checklist-90-Revised, HSCL-90-R Hopkins Symptom Checklist 90-Revised, PROMIS Patient-Reported Outcomes Measurement Information System, CT computed tomography, PET positron emission tomography, MRI magnetic resonance imaging  
All percentages were rounded to the nearest whole number

<sup>a</sup>NA is listed as the anxiety threshold when the study did not state a pre-specified threshold. In these cases, the definition of scanxiety prevalence was the percentage of people who reported any degree of anxiety

<sup>b</sup>Mean listed unless otherwise described; standard deviation listed only when available

<sup>c</sup>This study did not specify an anxiety threshold; however, the Anxiety subscale of the Hospital Anxiety and Depression Scale has validated thresholds. These thresholds were included in this table

<sup>d</sup>Dichotomous reporting assumed given description of question (self-perception of anxiety) and results “40.5% of the patients considered themselves to be anxious”[41]

<sup>e</sup>This study included participants who were *TP53* mutation carriers, and population controls

### Intervention studies

The ten intervention studies (**Table 4**) used 19 measures of anxiety, with five studies using one measure only[62, 66, 67, 69, 70], and five studies at least two[63-65, 68, 71]. The measures included subscales of the STAI (7 studies), Likert scales (5 studies), a variant of the Psychological Consequences Questionnaire (1 study[68]) and the Crown Crisp Experimental Index (1 study[65]).

Likert scales were varied, with a lower range limit of 0 or 1, and an upper range limit between 5 and 10[62, 63, 69-71]. The STAI was used and reported using one or both subscales[63-65, 67, 68, 71], or as a variant (8-item STAI[66]). There was variation from the usual STAI parameters, with studies using a different range (i.e. not reported[63, 65], 0 to 60[64], or 18 to 32[66]) or pre-specified anxiety thresholds of 40[68] or 16[66].

### Scanxiety outcomes

Prevalence and severity of scanxiety for each study are provided in **Table 3**. Summary statistics for prevalence and severity were not calculated due to heterogeneity in the type and timing of measurement between the studies.

#### Prevalence of scanxiety

Twenty-four of the 47 studies reported the prevalence of scanxiety. The prevalence of scanxiety above pre-specified anxiety thresholds ranged between 0% and 64% across the 16 measures[16, 19, 31, 38, 41, 43, 45, 52, 54, 58], though eight of these measures came from only two studies[41, 58]. In the 14 measures without a pre-specified anxiety threshold, the prevalence of any degree of scanxiety ranged between 13% and 83% [15, 21, 22, 24, 27, 28, 32-34, 37, 39, 41, 48, 49].

There were insufficient numbers to compare the prevalence of scanxiety using measures with pre-specified anxiety thresholds of people having scans for screening (11 measures[16, 31, 38, 43, 45, 54, 58]), reasons other than screening (four measures[41, 52]) and for screening or non-screening reasons (1 measure[19]). When no threshold was reported, the prevalence of scanxiety had a similar range (screening 23% to 81%, five measures[15, 21, 24, 27, 32]; reasons other than screening 14% to 83%, eight measures[28, 33, 34, 37, 39, 41, 48, 49]; either screening or reasons other than screening (40%, one measure[22]).

#### Severity of scanxiety

Severity of scanxiety was reported in 44 of 47 observational studies. Mean severity scores appeared low in almost all measures which quantitatively measured scanxiety (54/62, 87%).



**Table 4.** Effect of interventions to reducing scanxiety

| First author                 | Year      | Intervention                                                                                                                                                                                                           | Measurement of scanxiety       |                                   |                                                                                   | Impact of intervention on scanxiety                            |                                         |                                             |       |
|------------------------------|-----------|------------------------------------------------------------------------------------------------------------------------------------------------------------------------------------------------------------------------|--------------------------------|-----------------------------------|-----------------------------------------------------------------------------------|----------------------------------------------------------------|-----------------------------------------|---------------------------------------------|-------|
|                              |           |                                                                                                                                                                                                                        | Name of tool                   | Range of tool (Anxiety threshold) | Timing of assessment                                                              | Description of results                                         | P-value                                 |                                             |       |
| Mainiero[62]                 | 2001      | Arm A: an educational video about breast cancer and mammography<br>Arm B: an entertaining movie (from the 1940s to 1960s)                                                                                              | 6-point Likert score           | 0-5 (NA)                          | Pre-scan: immediate<br>Post-scan: immediate                                       | No difference                                                  | NR                                      |                                             |       |
| Domar[63]                    | 2005      | Arm A: relaxation audiotape, or;<br>Arm B: music audiotape, or;<br>Arm C: control (blank audiotape)                                                                                                                    | STAI: State Anxiety subscale   | NR (NA)                           | Pre-scan: immediate                                                               | No difference<br>Arm A v Arm B v Arm C: 34.8 v 33.6 v 33.2     | 0.18                                    |                                             |       |
|                              |           |                                                                                                                                                                                                                        |                                |                                   | Post-scan: immediate                                                              | No difference<br>Arm A v Arm B v Arm C: 30.4 v 30.9 v 33.2     | 0.78                                    |                                             |       |
|                              |           |                                                                                                                                                                                                                        | STAI: Trait Anxiety subscale   | NR (NA)                           | Pre-scan: immediate                                                               | No difference<br>Arm A v Arm B v Arm C: 32.6 v 32.7 v 32.5     | 0.99                                    |                                             |       |
|                              |           |                                                                                                                                                                                                                        | 11-point Likert scale          | 1-10 (NA)                         | Post-scan                                                                         | No difference<br>Arm A v Arm B v Arm C: 2.6 v 3.2 v 2.8        | 0.43                                    |                                             |       |
|                              |           |                                                                                                                                                                                                                        | Post-scan: immediate           | NR                                | NR                                                                                | NR                                                             |                                         |                                             |       |
| Fernandez-Feito[64]          | 2005      | Arm A: A protocolised nursing intervention (information and emotional support) and usual care, or;<br>Arm B: Usual care alone                                                                                          | STAI: State Anxiety subscale   | 0-60 (NA)                         | Pre-scan: immediate (post-intervention)                                           | Less severe                                                    | <0.001                                  |                                             |       |
|                              |           |                                                                                                                                                                                                                        |                                |                                   |                                                                                   | Less severe if fear of cancer present                          | 0.002                                   |                                             |       |
|                              |           |                                                                                                                                                                                                                        |                                |                                   |                                                                                   | Less severe if no fear of cancer present                       | 0.003                                   |                                             |       |
|                              |           |                                                                                                                                                                                                                        |                                |                                   |                                                                                   | No difference if fear of cancer outcome present                | 0.09                                    |                                             |       |
|                              |           |                                                                                                                                                                                                                        |                                |                                   |                                                                                   | Less severe if no fear of scan outcome                         | <0.001                                  |                                             |       |
| STAI: Trait Anxiety subscale | 0-60 (NA) | Pre-scan: immediate (post-intervention)                                                                                                                                                                                | No difference                  | 0.34                              |                                                                                   |                                                                |                                         |                                             |       |
| Caruso[65]                   | 2006      | Arm A: routine information and 45 minutes of informative-emotive psychological support with a psychologist, or;<br>Arm B: routine information                                                                          | Crown Crisp Experimental Index | NR (0-96)                         | Pre-scan: immediate (post-intervention)                                           | Less severe<br>Arm A v Arm B: 39.4 v 42.3                      | 0.03                                    |                                             |       |
|                              |           |                                                                                                                                                                                                                        |                                |                                   | STAI: State Anxiety subscale                                                      | NR (NA)                                                        | Pre-scan: immediate (post-intervention) | No difference<br>Arm A v Arm B: 57.7 v 58.6 | 0.77  |
|                              |           |                                                                                                                                                                                                                        |                                |                                   | STAI: Trait Anxiety subscale                                                      | NR (NA)                                                        | Post-scan: immediate                    | Less severe                                 | 0.048 |
| Vogel[66]                    | 2012      | Arm A: Uptake room with an audio-visual installation involving a video of nature scenes on a 119cm television, dynamic lighting & ambient electronic music<br>Arm B: Uptake room without the audio-visual installation | 8-item STAI                    | 18-32 (≥16)                       | Pre-scan: immediately before & immediately after fluorodeoxyglucose uptake period | Less severe<br>Arm A v Arm B: reduction by 2.39 v 1.02         | 0.04                                    |                                             |       |
|                              |           |                                                                                                                                                                                                                        |                                |                                   |                                                                                   | Pre-scan: immediate (post-intervention)                        | NR                                      | NR                                          |       |
| Acuff[67]                    | 2014      | Arm A: Receive a hand-held device to contact imaging staff during the scan<br>Arm B: No device                                                                                                                         | STAI: State Anxiety subscale   | 20-80 (NA)                        | During scan: immediately before completion of the scan                            | Less severe<br>Arm A v Arm B: 22.87 v 26.45                    | 0.014                                   |                                             |       |
|                              |           |                                                                                                                                                                                                                        |                                |                                   |                                                                                   | Less severe if previous PET/CT<br>Arm A v Arm B: 20.78 v 24.64 | 0.023                                   |                                             |       |

|              |      |                                                                                                                                       |                                               |             |                                                                                    |                                                                             |              |
|--------------|------|---------------------------------------------------------------------------------------------------------------------------------------|-----------------------------------------------|-------------|------------------------------------------------------------------------------------|-----------------------------------------------------------------------------|--------------|
|              |      |                                                                                                                                       |                                               |             |                                                                                    | No difference if first time PET/CT<br>Arm A v Arm B: 23.09 v 27.25, p=0.249 | 0.249        |
| Raz[68]      | 2014 | Arm A: multimedia education session and usual care, or;<br>Arm B: Usual care                                                          | STAI: State Anxiety subscale                  | 20-80 (≥40) | Pre-scan: within 2 weeks<br>Post-scan: immediate, at 1 week & 3-7 months post-scan | No difference at any time point                                             | NR           |
|              |      |                                                                                                                                       | STAI: Trait Anxiety subscale                  | 20-80 (≥40) |                                                                                    | No difference at any time point                                             | NR           |
|              |      |                                                                                                                                       | PCQ: Lung Cancer adaptation, Anxiety subscale | 0-18 (NR)   |                                                                                    | No difference at any time point                                             | 0.11 to 0.76 |
| Zavotsky[69] | 2014 | Arm A: music of their choice played via dock during the scan<br>Arm B: no music                                                       | 11-point Likert scale                         | 0-10 (NA)   | Post-scan: immediate                                                               | No difference<br>Arm A v Arm B: 2.36 v 2.98                                 | 0.21         |
| Ashton[70]   | 2019 | All participants: 10-minute shoulder & neck massage and/or hand massage before, during or after imaging, or between two imaging tests | 11-point Likert scale                         | 0-10 (NA)   | Post-intervention (pre- or post- scan)                                             | 81% had a reduction in anxiety following massage <sup>a</sup>               | <0.01        |
| Lorca[71]    | 2019 | Arm A: mindfulness meditation<br>Arm B: routine care                                                                                  | STAI: State Anxiety subscale                  | NR (NA)     | Post-scan: immediate                                                               | Less severe<br>Arm A v Arm B: 10.47 v 29.07                                 | 0.000        |
|              |      |                                                                                                                                       | STAI: Trait Anxiety subscale                  | NR (NA)     |                                                                                    | No difference                                                               | NS           |
|              |      |                                                                                                                                       | 11-item Likert scale                          | 0-10 (NA)   |                                                                                    | Less severe<br>Arm A v Arm B, 1.07 v 5.70                                   | 0.000        |

NA not applicable, NR not reported, STAI State-Trait Anxiety Inventory, PCQ Psychological Consequences Questionnaire

<sup>a</sup>Mean scores for overall study population not provided

Peer review only

1  
2  
3  
4  
5  
6  
7  
8  
9  
10  
11  
12  
13  
14  
15  
16  
17  
18  
19  
20  
21  
22  
23  
24  
25  
26  
27  
28  
29  
30  
31  
32  
33  
34  
35  
36  
37  
38  
39  
40  
41  
42  
43  
44  
45  
46  
47

The mean severity scores were below pre-specified anxiety thresholds on 17 of the 19 measures where a threshold was reported[16, 31, 37, 38, 41-43, 45, 47, 54, 57, 58]. The two exceptions were observed in a study comparing people with *TP53* mutations ('carriers') to controls, with all participants undergoing screening scans. In carriers, mean scores were maximally 11.4 (IES Intrusion subscale, threshold 8.5), and 13.3 (IES Avoidance subscale, threshold 8.5). Mean severity scores for controls were below the thresholds[58].

Of the 43 measures without a pre-specified threshold, the majority had mean scores that were less than half the total scores[15, 18, 20, 23-26, 29, 30, 32, 33, 35, 37, 38, 44-46, 49, 52-54, 56, 58, 60, 61]. There were six exceptions, which reported maximal mean severity scores of: 5.5 out of 10 (Likert scale)[17]; 6.4 out of 10 (Likert scale)[50]; 4.1 out of 7 (Likert scale)[40], 33 out of 60 (STAI State Anxiety subscale)[51], 8.1 out of 14 (Health Questionnaire)[58], and; 51.75 out of 80 (STAI)[59]. Four of these scores occurred in studies where scans were performed for reasons other than screening[17, 50, 51, 59], one allowed scans for diagnosis or screening[40], and one allowed scans for screening only[58].

Eight measures used a descriptive range of severity, with more severe levels of scanxiety in 4% to 28% of participants[21, 22, 25, 27, 28, 33, 34, 55].

Four measures could not be interpreted because they failed to report a range and anxiety threshold[31, 36, 47].

### Scanxiety before and after a scan

Of the 20 studies that reported a pre- and post-scan scanxiety measurement, 14 studies reported a statistical comparison[16, 18, 20, 29-32, 35, 38, 50, 51, 57-59] and six did not[23-26, 42, 60](**Table 3**). There was variation in the timing of scanxiety measurement before a scan from four weeks before the scan until immediately before the scan, and after a scan from immediately after the scan until one year after the scan. Five studies reported a post-scan reduction in scanxiety severity compared to pre-scan levels[16, 29, 30, 32, 50, 59]. Two studies reported an increase in post-scan scanxiety severity[51, 57], and two studies no difference in pre- and post-scan scanxiety severity[18, 31].

Four studies reported mixed findings on the change in scanxiety severity across different measures (**Table 5**).

**Table 5.** Studies with discrepant results on pre- and post-scan scanxiety severity using different measures

| First author | Measurement tool                                                       |                                                              |
|--------------|------------------------------------------------------------------------|--------------------------------------------------------------|
|              | Post-scan reduction in scanxiety                                       | No difference in pre- or post-scan scanxiety                 |
| Sutton[20]   | General Health Questionnaire: Anxiety subscale<br>3-point Likert scale | STAI: State Anxiety subscale<br>STAI: Trait Anxiety subscale |
| Vierikko[35] | Health Anxiety Inventory                                               | Worry about lung cancer                                      |
| Hutton[38]   | 6-item STAI                                                            | HADS: Anxiety subscale                                       |
| Bancroft[58] | HADS: Anxiety subscale                                                 | Cancer Worry Scale – Revised<br>Health Questionnaire         |

STAI: State Trait Anxiety Inventory, HADS: Hospital Anxiety and Depression Scale

Although Bancroft *et al.*[58] reported a reduction in scanxiety severity using HADS (anxiety subscale), there was no difference in scanxiety prevalence.

## Contributing factors to scanxiety

Multiple comparisons were made between scanxiety and possible contributing factors across the included studies (Table 6).

**Table 6.** Contributing factors to scanxiety

| Variable               | Comparison                                                | Effect on scanxiety         | Studies | <i>n</i> | <i>P</i> -value <sup>a</sup>                                                          |
|------------------------|-----------------------------------------------------------|-----------------------------|---------|----------|---------------------------------------------------------------------------------------|
| Age                    | Younger v older                                           | More prevalent              | 1       | 398      | 0.008[41]                                                                             |
|                        |                                                           | No difference in prevalence | 2       | 338      | NS[28, 50]                                                                            |
|                        |                                                           | More severe                 | 5       | 1883     | 0.005[45], <0.01[20], <0.01 (for screening)[70], 0.01[24], NR[63]                     |
|                        |                                                           | No difference in severity   | 11      | 6804     | NS[22, 27, 36, 37, 42, 43, 49, 51, 59, 62], NS (for surveillance)[70]                 |
| Gender                 | Men v women                                               | More prevalent              | 1       | 200      | <0.001[39]                                                                            |
|                        |                                                           | Less prevalent              | 1       | 298      | 0.021[41]                                                                             |
|                        |                                                           | No difference in prevalence | 1       | 106      | NS[28]                                                                                |
|                        |                                                           | More severe                 | 1       | 232      | 0.033 (post-scan)[50]                                                                 |
|                        |                                                           | Less severe                 | 2       | 1381     | 0.000[47], <0.05[57]                                                                  |
|                        |                                                           | No difference in severity   | 5       | 580      | NS[37, 49, 51, 59], NS (pre-scan)[50]                                                 |
| Ethnicity              | White v other races                                       | More severe                 | 1       | 143      | NR[63]                                                                                |
|                        | Maori & Pacific Islanders v New Zealand European or Asian | More severe                 | 1       | 584      | <0.001[27]                                                                            |
|                        | Any                                                       | No difference in severity   | 5       | 1454     | NS[22, 24, 37, 40, 49]                                                                |
| Education              | Lower v higher                                            | More prevalent              | 1       | 398      | <0.001[41]                                                                            |
|                        |                                                           | No difference in prevalence | 2       | 338      | NS[28, 50]                                                                            |
|                        |                                                           | More severe                 | 8       | 7400     | 0.003[62], 0.007[36], <0.01[22], ≤0.01[42], 0.012[24], 0.018[27], 0.04[43], <0.05[23] |
|                        |                                                           | No difference in severity   | 6       | 591      | NS[37, 49, 51, 59, 63, 69]                                                            |
| Employment             | Unemployed v employed                                     | More prevalent              | 1       | 398      | 0.046[41]                                                                             |
|                        |                                                           | More severe                 | 3       | 5056     | 0.01[43], 0.05[23], ≤0.05[42]                                                         |
|                        |                                                           | No difference in severity   | 2       | 654      | NS[27, 37]                                                                            |
| Income                 | Higher v lower                                            | No difference in severity   | 3       | 757      | NS[27, 37, 49]                                                                        |
| Marital status         | Married or de facto v single                              | More severe                 | 1       | 637      | ≤0.01 (using IES - Intrusion subscale)[42]                                            |
|                        |                                                           | No difference in severity   | 5       | 1790     | NS[24, 36, 37, 49], NS (using STAI - State anxiety subscale)[42]                      |
| Children               | Children v no children                                    | No difference in severity   | 3       | 5206     | NS[24, 37, 43]                                                                        |
| Smoking status         | Current v non-smoking <sup>b</sup>                        | More severe                 | 3       | 4562     | <0.001[43, 54], 0.031[47]                                                             |
|                        |                                                           | No difference in severity   | 2       | 330      | NS[40, 49]                                                                            |
| Reason for scan        | Diagnostic v screening                                    | More severe                 | 3       | 1104     | 0.007[41], 0.047[36], NR[62]                                                          |
|                        | Staging or surveillance v monitoring                      | More severe                 | 1       | 200      | <0.001[39]                                                                            |
|                        | Lower v higher referral clarity                           | More severe                 | 1       | 169      | 0.048[54]                                                                             |
| Type of scan           | MRI v mammogram                                           | More severe                 | 1       | 49       | 0.009[48]                                                                             |
|                        |                                                           | Less severe                 | 1       | 637      | NR[42]                                                                                |
|                        | CT v MRI                                                  | More severe                 | 1       | 36       | 0.007[44]                                                                             |
|                        |                                                           | Less severe                 | 1       | 115      | NR[52]                                                                                |
|                        | PET v CT                                                  | More severe                 | 1       | 82       | 0.01[33]                                                                              |
|                        | Nuclear medicine scan v non-nuclear medicine scan         | More severe                 | 1       | 398      | 0.004[41]                                                                             |
|                        | MRI v PET/CT                                              | No difference in severity   | 2       | 142      | NS[52, 53]                                                                            |
| CT v PET v chest X-ray | No difference in severity                                 | 1                           | 59      | NS[34]   |                                                                                       |

|                                         |                                              |                             |    |           |                                                                                                                                                                       |
|-----------------------------------------|----------------------------------------------|-----------------------------|----|-----------|-----------------------------------------------------------------------------------------------------------------------------------------------------------------------|
|                                         | Bone scan v PET scan                         | More severe                 | 1  | 94        | <0.001 (post-scan)[59]                                                                                                                                                |
|                                         |                                              | No difference in severity   | 1  | 94        | NS (pre-scan)[59]                                                                                                                                                     |
| Scan-naïve                              | First v subsequent scans                     | More prevalent              | 1  | 398       | 0.001[41]                                                                                                                                                             |
|                                         |                                              | No difference in prevalence | 1  | 200       | NS[39]                                                                                                                                                                |
|                                         |                                              | More severe                 | 5  | 3796      | <0.0005[38], <0.01[25], <0.02[19], <0.05[67], NR[66]                                                                                                                  |
|                                         |                                              | Less severe                 | 1  | 93        | 0.038[36]                                                                                                                                                             |
|                                         |                                              | No difference in severity   | 6  | 2491      | NS[24, 27, 50, 51, 59, 62]                                                                                                                                            |
| Pain                                    | Pain v no pain during scan                   | More severe                 | 6  | 4291      | <0.0001[25], <0.001[27], 0.001[62], <0.01[23, 69] <0.05[22]                                                                                                           |
| Risk of cancer                          | Past history v no past history of cancer     | More severe                 | 2  | 864       | ≤0.001[42], <0.05[40]                                                                                                                                                 |
|                                         |                                              | Less severe                 | 1  | 434       | 0.013[45]                                                                                                                                                             |
|                                         |                                              | No difference in severity   | 3  | 1206      | NS[15, 24, 58]                                                                                                                                                        |
|                                         | Family history v no family history of cancer | More severe                 | 1  | 584       | 0.002[27]                                                                                                                                                             |
|                                         |                                              | No difference in severity   | 3  | 1255      | NS[15, 24, 36]                                                                                                                                                        |
|                                         | Mutation carrier v not a carrier             | More severe                 | 1  | 88        | <0.05 (three comparisons, using IES cancer – Intrusion and Avoidance subscales, and post-scan Health Questionnaire)[58]                                               |
|                                         |                                              | No difference               | 1  | 88        | NS (five comparisons, using HADS- Anxiety subscale, Cancer Worry Scale – Revised, IES MRI – Intrusion and Avoidance subscales, and pre-scan Health Questionnaire)[58] |
| Higher, not otherwise specified v lower | More severe                                  | 1                           | 70 | <0.05[37] |                                                                                                                                                                       |
| Perceived risk of cancer                | Higher v lower                               | More severe                 | 3  | 1545      | <0.001[27], ≤0.001[42], <0.01[30]                                                                                                                                     |

NS not significant, NR not reported, IES Impact of Event Scale, STAI State Trait Anxiety Inventory, HADS Hospital Anxiety and Depression Scale, MRI Magnetic Resonance Imaging

<sup>a</sup>The P-values listed in this table were reported by individual studies based on their own datasets. This scoping review has not performed additional analysis or attempted quantitative comparisons between studies.

<sup>b</sup>One study compared current smokers v former smokers[54], and one study compared current and former smokers v never smokers[49]

In summary, higher scanxiety severity was associated with people with:

- Lower education (compared to higher education, eight of 14 studies[22-24, 27, 36, 37, 42, 43, 49, 51, 59, 62, 63, 69]);
- A history of smoking (compared to non-smoking, three of five studies[40, 43, 47, 49, 54]);
- Higher pain levels during the scan (compared to no pain, all six studies[22, 23, 25, 27, 62, 69]);
- Higher perceived risk of cancer (compared to lower perceived risk of cancer, all three studies[27, 30, 42]), and;
- Diagnostic scans (compared to screening scans, all three studies[36, 41, 62])

The prevalence or severity of scanxiety was not consistently affected by age (13 of 19 comparisons[20, 22, 24, 27, 28, 36, 37, 41-43, 45, 49-51, 59, 62, 63, 70]), gender (six of 11 comparisons[28, 37, 39, 41, 47, 49-51, 57, 59]), ethnicity (five of seven comparisons[22, 24, 27, 37, 40, 49, 63]), income (all three comparisons[27, 37, 49]), marital status (five of six comparisons[24, 36, 37, 42, 49]) or having children (all three comparisons[24, 37, 43]).

Inconclusive results occurred in the following comparisons:

- Employment (unemployed compared to employed, four of six comparisons[23, 27, 37, 41-43])

- Scan-naivety (first scan compared to subsequent scans, six of 13 comparisons[19, 24, 25, 27, 36, 38, 39, 41, 50, 51, 62, 66, 67])
- Risk of cancer (higher compared to lower risk of cancer, seven of 19 comparisons[15, 24, 27, 36, 37, 40, 42, 45, 58])

Although nine studies reported differences in scanxiety between different imaging modalities, the number of comparisons between specific scans were insufficient to draw conclusions[33, 34, 41, 42, 44, 48, 52, 53, 59].

### Interventions that reduce scanxiety

Five of the 10 intervention studies showed a reduction in scanxiety compared to controls[64-67, 71]. Four studies reported no difference in scanxiety between the intervention arms[62, 63, 68, 69]. The study where all participants received the same intervention showed a reduction in anxiety[70]. Details of these results are listed in **Table 4**.

Both multi-faceted interventions studies incorporating education and emotional or psychological support showed a reduction in scanxiety[64, 65].

Of the six studies with relaxation, distraction and/or meditation components, three studies showed a reduction in scanxiety[66, 70, 71], while three studies did not[62, 63, 69].

Interventions with only educational components did not show a reduction in scanxiety[62, 68].

A reduction in scanxiety severity was also observed when a hand-held device was available to communicate with radiology staff. This reduction was observed in the subgroup of participants who had had a previous scan, but not in participants having their first scan[67].

## DISCUSSION

This is the first systematic scoping review aimed at quantifying the phenomenon of scanxiety in people having cancer-related scans. Scanxiety is a common and important clinical problem, as supported by the large number of studies identified by our search. There is a wide range of reported scanxiety prevalence (0 to 83%), and scanxiety is generally not severe. Severity of scanxiety may be lower after a scan and is higher in people who have a lower education, currently smoke, experience pain during a scan, have higher perceived risk of cancer, and who are having diagnostic (rather than screening) scans. Interventions may be more likely to reduce scanxiety if they involve active participation (eg psychological and emotional support, meditation or a hand-held communication device) rather than passive participation (listening to music or education only).

Firm conclusions about prevalence and severity could not be drawn due to considerable methodological heterogeneity of the included studies, especially in relation to scanxiety measurement tools. None were designed and validated for scanxiety, and some tools and their thresholds were not designed and/or validated for anxiety. This review did use purpose-designed definitions of prevalence and severity to allow some comparison between studies; however, the lack of a universal definition or specific measurement tool for scanxiety limits confidence in the interpretation of the results and interstudy

1  
2  
3 comparisons. This highlights the need for a universally accepted measure to quantify scanxiety and  
4 evaluate scanxiety interventions in the future. A recent literature review by Al-Dibouni[75] provided a  
5 narrative overview of scanxiety in people having scans for any reason, and also recognised the lack of a  
6 specific measurement tool for scanxiety and variable scanxiety prevalence among studies[75].  
7

8  
9 Given the STAI and Likert scales were the most common tools used, we propose that future studies use  
10 the state anxiety subscale of the STAI, with a range of 20-80 and no specific anxiety threshold[72] (or  
11 variants, such as the STAI-6[76]), and/or the distress thermometer, with a range of 0-10 and a clinically  
12 significant threshold of  $\geq 4$ [77], to measure scanxiety. These tools can be combined with other validated  
13 anxiety measures, such as the HADS, to further refine the relationship between tools. Using existing  
14 measures rather than developing a scanxiety specific tool allows scanxiety assessment to occur  
15 immediately and broadly in clinical research.  
16

17  
18 Strengths of this scoping review include the rigorous methodology using a published framework[12, 13],  
19 two independent researchers for study selection and data extraction, and the implementation of a  
20 comprehensive search strategy and broad inclusion criteria to achieve an exhaustive review of the  
21 available literature. Limitations include the use of purpose-designed definitions of prevalence and  
22 severity and the limited generalisability of the results due to heterogeneity in cancer type, reason for  
23 scan, imaging modality and timing of scanxiety measurement between the studies, and because the  
24 search strategy was restricted to English language databases. Finally, scanxiety in people who were  
25 recalled after an abnormal screening result were excluded from this review due to confounding and  
26 feasibility. These populations may be at higher risk of scanxiety, and further research may provide  
27 further insight about the scanxiety experience in this population.  
28  
29

30  
31 Additional research implications of our review include the need for research into high-risk populations  
32 for scanxiety, including people with advanced cancer. This population was included in only three studies  
33 [49, 55, 60]; however, people with cancer have higher rates of anxiety compared to the general  
34 population[78]. As they may be more likely to develop scanxiety, experience more severe scanxiety, or  
35 have higher post-scan scanxiety while waiting for scan results, longitudinal assessment of scanxiety is  
36 required. Further research into effective and feasible interventions is also required, though these will  
37 face implementation challenges due to variations in health systems and available resources.  
38  
39  
40

## 41 CONCLUSIONS

42  
43 Prevalence and severity of scanxiety varied widely, although heterogeneity in scanxiety measurement  
44 interpretation. A uniform approach to evaluating scanxiety will improve understanding of the  
45 phenomenon and help guide the development of interventions to high-risk populations.  
46  
47  
48

## 49 FOOTNOTES

50  
51 **Contributions:** KTB, PB, BK, HD and CB contributed to the concept and design of this review. KTB  
52 developed and implemented the search strategy. KTB and RL independently screened and reviewed  
53 titles, abstracts and full-text articles for inclusion. KTB and RL independently extracted data from the  
54 included studies. PB, BK, HD and CB contributed content expertise to ensure clinically relevant  
55  
56  
57  
58

1  
2  
3 interpretation of the data. KTB drafted the initial manuscript, and RL, PB, BK, HD and CB reviewed and  
4 approved the manuscript prior to submission.  
5

6 **Ethical approval:** This study was not submitted for ethics approval because it is a review article and does  
7 not directly recruit participants.  
8

9 **Competing interests:** None declared  
10

11 **Funding:** This research received no specific grant from any funding agency in the public, commercial or  
12 not-for-profit sectors  
13

14 **Data availability:** All data relevant to the study are included in the article or uploaded as supplementary  
15 information. Data are available upon reasonable request. The additional data are the data extraction  
16 forms for each study.  
17  
18  
19

## 20 REFERENCES

- 21 1. Feiler B. Scanxiety. Fear of a postcancer ritual. *Time* 2011;177(24):56
- 22 2. Brandzel S, Erosenberg D, Johnson D, et al. Women's experiences and preferences regarding  
23 breast imaging after completing breast cancer treatment. *Patient Prefer Adherence* 2017;11:199-  
24 204.doi:10.2147/PPA.S122244
- 25 3. Evans R, Taylor S, Janes S, et al. Patient experience and perceived acceptability of whole-body  
26 magnetic resonance imaging for staging colorectal and lung cancer compared with current staging scans:  
27 a qualitative study. *BMJ Open* 2017;7(9):e016391.doi:10.1136/bmjopen-2017-016391
- 28 4. Mathers SA, McKenzie GA, Robertson EM. A necessary evil: The experiences of men with  
29 prostate cancer undergoing imaging procedures. *Radiography* 2011;17(4):284-  
30 91.doi:10.1016/j.radi.2011.06.005
- 31 5. Strand T, Tornqvist E, Rask M, et al. The experience of patients with neoplasm metastasis in the  
32 spine during a magnetic resonance imaging examination. *J Radiol Nurs* 2014;33(4):191-  
33 8.doi:10.1016/j.jradnu.2014.09.001
- 34 6. Truesdale-Kennedy M, Taggart L, McIlpatrick S. Breast cancer knowledge among women with  
35 intellectual disabilities and their experiences of receiving breast mammography. *J Adv Nurs*  
36 2011;67(6):1294-304.doi:10.1111/j.1365-2648.2010.05595.x
- 37 7. Memorial Sloan Kettering. Coping with "Scanxiety" during and after Cancer Treatment 2013.  
38 <https://www.mskcc.org/blog/coping-scanxiety-during-and-after-treatment/> (accessed May 2020).
- 39 8. Dana-Farber Cancer Institute. Scan Anxiety (or 'Scanxiety'): 5 Approaches to Coping 2019.  
40 <https://blog.dana-farber.org/insight/2019/02/5-tips-for-reducing-scanxiety/> (accessed May 2020).
- 41 9. Barter K. Scans + Anxiety = Scanxiety 2019. <https://pinkhope.org.au/scans-anxiety-scanxiety/>  
42 (accessed May 2020).
- 43 10. brainstrust. Scanxiety. [https://brainstrust.org.uk/brain-tumour-support/quality-of-life/living-  
44 well-with-a-brain-tumour/scanxiety/](https://brainstrust.org.uk/brain-tumour-support/quality-of-life/living-well-with-a-brain-tumour/scanxiety/) (accessed May 2020).
- 45 11. Fight Colorectal Cancer. Waiting for Test Results: 5 Tips to Minimize Scanxiety 2019.  
46 <https://fightcolorectalcancer.org/blog/scanxiety/> (accessed May 2020).
- 47 12. Arksey H, O'Malley L. Scoping studies: towards a methodological framework. *Int J Soc Res*  
48 *Methodol* 2005;8(1):19-32.doi:10.1080/1364557032000119616
- 49 13. Levac D, Colquhoun H, O'Brien KK. Scoping studies: advancing the methodology. *Implement Sci*  
50 2010;5:69.doi:10.1186/1748-5908-5-69  
51  
52  
53  
54  
55  
56  
57  
58



14. Tricco AC, Lillie E, Zarin W, et al. PRISMA Extension for Scoping Reviews (PRISMA-ScR): Checklist and Explanation. *Ann Intern Med* 2018;169(7):467-73.doi:10.7326/M18-0850
15. Andolf E, Jorgensen C, Uddenberg N, et al. Psychological effects of ultrasound screening for ovarian carcinoma. *J Psychosom Obstet Gynaecol* 1990;11(2):155-62.doi:10.3109/01674829009084412
16. Bull AR, Campbell MJ. Assessment of the psychological impact of a breast screening programme. *Br J Radiol* 1991;64(762):510-5.doi:10.1259/0007-1285-64-762-510
17. Peteet JR, Stomper PC, Ross DM, et al. Emotional support for patients with cancer who are undergoing CT: semistructured interviews of patients at a cancer institute. *Radiology* 1992;182(1):99-102.doi:10.1148/radiology.182.1.1727318
18. Cockburn J, Staples M, Hurley SF, et al. Psychological consequences of screening mammography. *J Med Screen* 1994;1(1):7-12.doi:10.1177/096914139400100104
19. Ellman R, Thomas BA. Is psychological wellbeing impaired in long-term survivors of breast cancer? *J Med Screen* 1995;2(1):5-9.doi:10.1177/096914139500200103
20. Sutton S, Saidi G, Bickler G, et al. Does routine screening for breast cancer raise anxiety? Results from a three wave prospective study in England. *J Epidemiol Community Health* 1995;49(4):413-8.doi:10.1136/jech.49.4.413
21. Bakker DA, Lightfoot NE, Steggles S, et al. The experience and satisfaction of women attending breast cancer screening. *Oncol Nurs Forum* 1998;25(1):115-21
22. Gupta R, Nayak MB, Khoursheed M, et al. Emotional distress in women presenting for breast imaging. *Ann Saudi Med* 1999;19(6):511-4.doi:10.5144/0256-4947.1999.511
23. Hafslund B. Mammography and the experience of pain and anxiety. *Radiography* 2000;6(4):269-72.doi:10.1053/radi.2000.0281
24. Meystre-Agustoni G, Paccaud F, Jeannin A, et al. Anxiety in a cohort of Swiss women participating in a mammographic screening programme. *J Med Screen* 2001;8(4):213-9.doi:10.1136/jms.8.4.213
25. Drossaert CH, Boer H, Seydel ER. Monitoring women's experiences during three rounds of breast cancer screening: results from a longitudinal study. *J Med Screen* 2002;9(4):168-75.doi:10.1136/jms.9.4.168
26. Sandin B, Chorot P, Valiente RM, et al. Adverse psychological effects in women attending a second-stage breast cancer screening. *J Psychosom Res* 2002;52(5):303-9.doi:10.1016/s0022-3999(01)00227-6
27. Brunton M, Jordan C, Campbell I. Anxiety before, during, and after participation in a population-based screening mammography programme in Waikato Province, New Zealand. *N Z Med J* 2005;118(1209):U1299
28. Geurts TW, Ackerstaff AH, Van Zandwijk N, et al. The psychological impact of annual chest X-ray follow-up in head and neck cancer. *Acta Otolaryngol* 2006;126(12):1315-20.doi:10.1080/00016480600868414
29. Tyndel S, Austoker J, Henderson BJ, et al. What is the psychological impact of mammographic screening on younger women with a family history of breast cancer? Findings from a prospective cohort study by the PIMMS Management Group. *J Clin Oncol* 2007;25(25):3823-30.doi:10.1200/JCO.2007.11.0437
30. Bunge EM, van den Bergh KA, Essink-Bot ML, et al. High affective risk perception is associated with more lung cancer-specific distress in CT screening for lung cancer. *Lung Cancer* 2008;62(3):385-90.doi:10.1016/j.lungcan.2008.03.029
31. Brown Sofair J, Lehlbach M. The role of anxiety in a mammography screening program. *Psychosomatics* 2008;49(1):49-55.doi:10.1176/appi.psy.49.1.49

- 1  
2  
3 32. van den Bergh KA, Essink-Bot ML, Bunge EM, et al. Impact of computed tomography screening  
4 for lung cancer on participants in a randomized controlled trial (NELSON trial). *Cancer* 2008;113(2):396-  
5 404.doi:dx.doi.org/10.1002/cncr.23590
- 6 33. Westerterp M, van Westreenen HL, Deutekom M, et al. Patients' perception of diagnostic tests  
7 in the preoperative assessment of esophageal cancer. *Patient Prefer Adherence* 2008;2:157-62
- 8 34. Bastiaannet E, Hoekstra-Weebers JE, Francken AB, et al. Perception of burden experienced  
9 during diagnostic tests by melanoma patients with lymph node metastases. *Melanoma Res*  
10 2009;19(1):36-41.doi:10.1097/CMR.0b013e32831993b7
- 11 35. Vierikko T, Kivisto S, Jarvenpaa R, et al. Psychological impact of computed tomography screening  
12 for lung cancer and occupational pulmonary disease among asbestos-exposed workers. *Eur J Cancer*  
13 *Prev* 2009;18(3):203-6.doi:10.1097/cej.0b013e328329d800
- 14 36. Bolukbas N, Erbil N, Kahraman AN. Determination of the anxiety level of women who present for  
15 mammography. *Asian Pac J Cancer Prev* 2010;11(2):495-8
- 16 37. Thompson CA, Charlson ME, Schenkein E, et al. Surveillance CT scans are a source of anxiety and  
17 fear of recurrence in long-term lymphoma survivors. *Ann Oncol* 2010;21(11):2262-  
18 6.doi:10.1093/annonc/mdq215
- 19 38. Hutton J, Walker LG, Gilbert FJ, et al. Psychological impact and acceptability of magnetic  
20 resonance imaging and X-ray mammography: the MARIBS Study. *Br J Cancer* 2011;104(4):578-  
21 86.doi:10.1038/bjc.2011.1
- 22 39. Pifarre P, Simo M, Gispert JD, et al. [Diagnostic imaging studies: do they create anxiety?]. *Rev*  
23 *Esp Med Nucl* 2011;30(6):346-50.doi:dx.doi.org/10.1016/j.remnu.2011.03.003
- 24 40. Steinemann SK, Chun MB, Huynh DH, et al. Breast cancer worry among women awaiting  
25 mammography: is it unfounded? Does prior counseling help? *Hawaii Med J* 2011;70(7):149-50
- 26 41. Yu LS, Chojniak R, Borba MA, et al. Prevalence of anxiety in patients awaiting diagnostic  
27 procedures in an oncology center in Brazil. *Psychooncology* 2011;20(11):1242-5.doi:10.1002/pon.1842
- 28 42. Bredart A, Kop JL, Fall M, et al. Anxiety and specific distress in women at intermediate and high  
29 risk of breast cancer before and after surveillance by magnetic resonance imaging and mammography  
30 versus standard mammography. *Psychooncology* 2012;21(11):1185-94.doi:10.1002/pon.2025
- 31 43. Hafslund B, Espehaug B, Nortvedt MW. Health-related quality of life, anxiety and depression  
32 related to mammography screening in Norway. *J Clin Nurs* 2012;21(21-22):3223-34.doi:10.1111/j.1365-  
33 2702.2012.04244.x
- 34 44. Adams HJ, Kwee TC, Vermoolen MA, et al. Whole-body MRI vs. CT for staging lymphoma: patient  
35 experience. *Eur J Radiol* 2014;83(1):163-6.doi:10.1016/j.ejrad.2013.10.008
- 36 45. Baena-Canada JM, Rosado-Varela P, Exposito-Alvarez I, et al. Women's perceptions of breast  
37 cancer screening. Spanish screening programme survey. *Breast* 2014;23(6):883-  
38 8.doi:10.1016/j.breast.2014.09.010
- 39 46. Andersson C, Johansson B, Wassberg C, et al. Patient experience of an 18F-FDG-PET/CT  
40 examination: Need for improvements in patient care. *J Radiol Nurs* 2015;34(2):100-  
41 8.doi:10.1016/j.jradnu.2014.11.008
- 42 47. Elboga U, Elboga G, Can C, et al. Assessment of procedure related anxiety and depression in  
43 oncologic patients before F-18 FDG PET-CT imaging. *J Psychiatry* 2015;18 (1) (no  
44 pagination)(215).doi:10.4172/Psychiatry.1000215
- 45 48. Hobbs MM, Taylor DB, Buzynski S, et al. Contrast-enhanced spectral mammography (CESM) and  
46 contrast enhanced MRI (CEMRI): Patient preferences and tolerance. *J Med Imaging Radiat Oncol*  
47 2015;59(3):300-5.doi:10.1111/1754-9485.12296
- 48 49. Bauml JM, Troxel A, Epperson CN, et al. Scan-associated distress in lung cancer: Quantifying the  
49 impact of "scanxiety". *Lung Cancer* 2016;100:110-3.doi:10.1016/j.lungcan.2016.08.002
- 50  
51  
52  
53  
54  
55  
56  
57  
58

- 1  
2  
3 50. Abreu C, Grilo A, Lucena F, et al. Oncological Patient Anxiety in Imaging Studies: the PET/CT  
4 Example. *J Cancer Educ* 2017;32(4):820-6.doi:10.1007/s13187-016-1069-3
- 5 51. Grilo A, Vieira L, Carolino E, et al. Anxiety in Cancer Patients during (18)F-FDG PET/CT Low Dose:  
6 A Comparison of Anxiety Levels before and after Imaging Studies. *Nurs Res Pract*  
7 2017;2017:3057495.doi:10.1155/2017/3057495
- 8 52. Evans RE, Taylor SA, Beare S, et al. Perceived patient burden and acceptability of whole body  
9 MRI for staging lung and colorectal cancer; comparison with standard staging investigations. *Br J Radiol*  
10 2018;91(1086):20170731.doi:10.1259/bjr.20170731
- 11 53. Goense L, Borggreve AS, Heethuis SE, et al. Patient perspectives on repeated MRI and PET/CT  
12 examinations during neoadjuvant treatment of esophageal cancer. *Br J Radiol*  
13 2018;91(1086):20170710.doi:10.1259/bjr.20170710
- 14 54. Hall DL, Lennes IT, Carr A, et al. Lung Cancer Screening Uncertainty among Patients Undergoing  
15 LDCT. *Am J Health Behav* 2018;42(1):69-76.doi:10.5993/AJHB.42.1.7
- 16 55. Derry HM, Maciejewski PK, Epstein AS, et al. Associations between Anxiety, Poor Prognosis, and  
17 Accurate Understanding of Scan Results among Advanced Cancer Patients. *J Palliat Med* 2019;22(8):961-  
18 5.doi:10.1089/jpm.2018.0624
- 19 56. Soriano EC, Perndorfer C, Siegel SD, et al. Threat sensitivity and fear of cancer recurrence: a daily  
20 diary study of reactivity and recovery as patients and spouses face the first mammogram post-diagnosis.  
21 *J Psychosoc Oncol* 2019;37(2):131-44.doi:10.1080/07347332.2018.1535532
- 22 57. Taghizadeh N, Tremblay A, Cressman S, et al. Health-related quality of life and anxiety in the  
23 PAN-CAN lung cancer screening cohort. *BMJ Open* 2019;9(1):e024719.doi:10.1136/bmjopen-2018-  
24 024719
- 25 58. Bancroft EK, Saya S, Brown E, et al. Psychosocial effects of whole-body MRI screening in adult  
26 high-risk pathogenic TP53 mutation carriers: a case-controlled study (SIGNIFY). *J Med Genet*  
27 2020;57(4):226-36.doi:10.1136/jmedgenet-2019-106407
- 28 59. Grilo AM, Vieira L, Carolino E, et al. Cancer Patient Experience in a Nuclear Medicine  
29 Department: Comparison between Bone Scintigraphy and (18)F-FDG PET/CT. *J Nucl Med Technol*  
30 2020.doi:10.2967/jnmt.119.239285
- 31 60. Morreale MK, Moore TF, Kim S, et al. Preferences for notification of imaging results in patients  
32 with metastatic cancer. *Patient Educ Couns* 2020;103(2):392-7.doi:10.1016/j.pec.2019.08.032
- 33 61. Paiella S, Marinelli V, Secchettin E, et al. The emotional impact of surveillance programs for  
34 pancreatic cancer on high-risk individuals: A prospective analysis. *Psychooncology* 2020;29(6):1004-  
35 11.doi:10.1002/pon.5370
- 36 62. Mainiero MB, Schepps B, Clements NC, et al. Mammography-related anxiety: effect of  
37 preprocedural patient education. *Womens Health Issues* 2001;11(2):110-5.doi:10.1016/s1049-  
38 3867(00)00071-2
- 39 63. Domar AD, Eyvazzadeh A, Allen S, et al. Relaxation techniques for reducing pain and anxiety  
40 during screening mammography. *AJR Am J Roentgenol* 2005;184(2):445-  
41 7.doi:10.2214/ajr.184.2.01840445
- 42 64. Fernandez-Feito A, Lana A, Baldonado-Cernuda R, et al. A brief nursing intervention reduces  
43 anxiety before breast cancer screening mammography. *Psicothema* 2015;27(2):128-  
44 33.doi:10.7334/psicothema2014.203
- 45 65. Caruso A, Bongiorno L, Vallini L, et al. Breast cancer and distress resulting from Magnetic  
46 Resonance Imaging (MRI): the impact of a psychological intervention of emotional and informative  
47 support. *J Exp Clin Cancer Res* 2006;25(4):499-505
- 48 66. Vogel WV, Valdes Olmos RA, Tijs TJ, et al. Intervention to lower anxiety of 18F-FDG PET/CT  
49 patients by use of audiovisual imagery during the uptake phase before imaging. *J Nucl Med Technol*  
50 2012;40(2):92-8.doi:10.2967/jnmt.111.097964
- 51  
52  
53  
54  
55  
56  
57  
58

- 1  
2  
3 67. Acuff SN, Bradley YC, Barlow P, et al. Reduction of patient anxiety in PET/CT imaging by  
4 improving communication between patient and technologist. *J Nucl Med Technol* 2014;42(3):211-  
5 7.doi:10.2967/jnmt.114.139915  
6  
7 68. Raz DJ, Nelson RA, Kim JY, et al. Pilot study of a video intervention to reduce anxiety and  
8 promote preparedness for lung cancer screening. *Cancer Treat Res Commun* 2018;16:1-  
9 8.doi:10.1016/j.ctarc.2018.04.004  
10  
11 69. Zavotsky KE, Banavage A, James P, et al. The effects of music on pain and anxiety during  
12 screening mammography. *Clin J Oncol Nurs* 2014;18(3):E45-9.doi:10.1188/14.CJON.E45-E49  
13  
14 70. Ashton JC, Bousquet D, Fevrier E, et al. Massage therapy in the breast imaging department:  
15 repurposing an ancient anxiety reducing method. *Clin Imaging* 2020;67:49-  
16 54.doi:10.1016/j.clinimag.2020.05.029  
17  
18 71. Lorca AM, Lorca MM, Criado JJ, et al. Using mindfulness to reduce anxiety during pet/ct studies.  
19 *Mindfulness* 2019;10:1163-8.doi:10.1007/s12671-018-1065-2  
20  
21 72. Spielberger CD, Gorsuch RL, Lushene R, et al. Manual for the State-Trait Anxiety Inventory. Palo  
22 Alto, CA: Consulting Psychologists Press 1983.  
23  
24 73. Zigmond AS, Snaith RP. The Hospital Anxiety and Depression Scale. *Acta Psychiatr Scand*  
25 1983;67(6):361-70.doi:10.1111/j.1600-0447.1983.tb09716.x  
26  
27 74. Rush Jr AJ, First MB, Blacker D. Handbook of Psychiatric Measures: Symptom Checklist-90-  
28 Revised (SCL-90-R); Brief Symptom Inventory (BSI). 2nd ed. Arlington, VA: American Psychiatric  
29 Publishing, Inc. 2008.  
30  
31 75. Al-Dibouni Z. Scanxiety. Improving the patient's experience. Part 1. *Imaging & Therapy Practice*  
32 2019;21-5  
33  
34 76. Marteau T, Bekker H. The development of a six-item short-form of the state scale of the  
35 Spielberger State-Trait Anxiety Inventory (STAI). *Br J Clin Psychol* 1992;31(3):301-6.doi:10.1111/j.2044-  
36 8260.1992.tb00997.x  
37  
38 77. Ownby K. Use of the Distress Thermometer in Clinical Practice. *J Adv Pract Oncol*  
39 2019;10(2).doi:10.6004/jadpro.2019.10.2.7  
40  
41 78. Pitman A, Suleman S, Hyde N, et al. Depression and anxiety in patients with cancer. *BMJ*  
42 2018;361:k1415.doi:10.1136/bmj.k1415  
43  
44  
45  
46  
47  
48  
49  
50  
51  
52  
53  
54  
55  
56  
57  
58

## FIGURE CAPTIONS

40 **Figure 1.** Search strategy used for Ovid MEDLINE (1946 onwards)

42 **Figure 2.** Study search and selection flow diagram

**Figure 1.** Search strategy used for Ovid MEDLINE (1946 onwards)

| # | Search                | #  | Search                  | #  | Search                 | #  | Search           |
|---|-----------------------|----|-------------------------|----|------------------------|----|------------------|
| 1 | Exp Neoplasms/        | 10 | Exp Diagnostic Imaging/ | 15 | exp Anxiety/           | 22 | or/1-9           |
| 2 | Exp Medical oncology/ | 11 | imaging.ti,ab           | 16 | exp Anxiety Disorders/ | 23 | or/10-14         |
| 3 | neoplasm*.ti,ab       | 12 | scan.ti,ab              | 17 | exp Fear/              | 24 | or/15-21         |
| 4 | cancer*.ti,ab         | 13 | tomography.ti,ab        | 18 | anxi*.ti,ab            | 25 | 22 and 23 and 24 |
| 5 | neoplasm*.ti,ab       | 14 | ultraso*.ti,ab          | 19 | fear.ti,ab             |    |                  |
| 6 | malignan*.ti,ab       |    |                         | 20 | worr*.ti,ab            |    |                  |
| 7 | tum??r*.ti,ab         |    |                         | 21 | distress*.ti,ab        |    |                  |
| 8 | oncolog*.ti,ab        |    |                         |    |                        |    |                  |
| 9 | carcinoma*.ti,ab      |    |                         |    |                        |    |                  |

For peer review only

**Figure 2.** Study search and selection flow diagram

1  
2  
3 **Supplementary File 1. Protocol**

4 **Scanxiety: A scoping review about scan-associated anxiety**

5  
6 Protocol

7  
8 Version 1.0, 10/04/2019  
9

10  
11 **Authors**

12 Dr Kim Tam Bui

13 Dr Roger Liang

14 Dr Haryana Dhillon

15 Dr Belinda Kiely

16 Dr Prunella Blinman  
17  
18  
19  
20  
21  
22

23 **Correspondence**

24 Dr Kim Tam Bui

25 Email: [tam.bui@health.nsw.gov.au](mailto:tam.bui@health.nsw.gov.au)

26 Concord Cancer Centre

27 Concord Repatriation General Hospital

28 1A Hospital Road

29 Concord NSW 2137  
30  
31  
32  
33  
34  
35  
36  
37  
38  
39  
40  
41  
42  
43  
44  
45  
46  
47  
48  
49  
50  
51  
52  
53  
54  
55  
56  
57  
58  
59  
60

## Introduction

Radiological scans are necessary to diagnose and stage cancers, to monitor for cancer recurrence or progression or to investigate new cancer- or treatment-related problems. Imaging modalities include plain X-rays, computed tomography (CT) scans, positron-emission tomography (PET) scans, magnetic resonance imaging (MRI), ultrasound and nuclear medicine bone scans.

Distress before, during or after a scan has been dubbed “scanxiety” by a patient writing for the Time Magazine in 2011[1]. This is a common clinical problem that is widely discussed on social media and patient forms, but there is a paucity in the literature about this topic. This systematic scoping study aims to increase the understanding about scanxiety.

## Objectives

The objectives of this study are to:

- determine the incidence and severity of scanxiety in adults who have scans for cancer-related reasons;
- compare tools that measure scanxiety;
- identify contributing and exacerbating determinants of scanxiety;
- identify strategies or interventions that reduce scanxiety; and,
- explore the experiences of scanxiety for patients and other stakeholders

## Methods

This protocol is based on the six-step methodological framework developed by Arskey & O’Malley[2] and modified by Levac *et al.*[3], and guided by the Preferred Reporting Items for Systematic review and Meta-Analysis Protocols extension for Scoping Reviews (PRISMA-ScR) checklist[4].

## ***Inclusion and exclusion criteria***

Publications will be included if they were original full-text research articles that addressed scanxiety in adults over 18 years of age who had a scan for a cancer-related reason. Outcome measures have to include at least one of the following: the incidence of scanxiety; severity of scanxiety; contributing or exacerbating factors of scanxiety; intervention to improve scanxiety, or; experiences of patients with scanxiety. All types of non-interventional imaging modalities are acceptable. Any type or stage of cancer is acceptable, including populations undergoing cancer screening. No date or language restriction will be applied to electronic database searching.



Interventional imaging will be excluded. Review articles, editorials, letters and protocols will be excluded.

### ***Search protocol***

A systematic review of the following electronic databases will be conducted by one author (KTB): Ovid MEDLINE, Ovid EMBASE, Ovid PsycINFO, Ovid Cochrane, Scopus, ESCBO CINAHL and PubMed. The search strategy will combine the subject headings and keywords of cancer (neoplasm\* or cancer\* or malignan\* or tum??r\* or oncolog\* or carcinoma\*), imaging (diagnostic imaging or imaging or scan\* or tomography or ultraso\* or radionucl\*) and anxiety (anxi\* or fear\* or worr\* or distress\*). Hand searching of reference lists of included articles will be undertaken.

All references will be imported into Endnote V9. After removal of duplicates, two authors (KTB and RL) will independently review and screen publication titles and abstracts for eligibility. Of the articles deemed potentially eligible, the full text of the article will be evaluated for final inclusion. Discrepancies will be decided by discussion between the two authors (KTB and RL), and will be escalated to all authors if a consensus cannot be reached.

### ***Data extraction and analysis***

Standardised data collection forms will be developed. Relevant data will be independently extracted from by two authors (KTB and RL) into an electronic data extraction form (Table 1).

Table 1. Included data items on the electronic data extraction form

|                     |                                                                                                                       |
|---------------------|-----------------------------------------------------------------------------------------------------------------------|
| Publication details | Study name/Title of article<br>Study authors<br>Date of publication (year)<br>Country the study was held              |
| Study details       | Study aims<br>Population including age, gender, type of cancer<br>Study design<br>Measurement tool used for scanxiety |
| Results/outcomes    | Sample size<br>Demographics – gender, age<br>Cancer factors – type of cancers included<br>Incidence of scanxiety      |

|  |                                                              |
|--|--------------------------------------------------------------|
|  | Severity of scanxiety                                        |
|  | Contributing and exacerbating determinants of scanxiety      |
|  | Experiences of scanxiety for patients and other stakeholders |
|  | If intervention: efficacy                                    |

Data will be analysed depending on the population who underwent imaging (eg for screening, for early cancer or for advanced cancer) and the type of study (eg observational or intervention). Quantitative findings will be synthesised using summary statistics including the mean and range.

### **Consultation**

Health care professionals with clinical experience in oncology and psychology will be consulted for content expertise and to discuss preliminary findings.

### **References**

1. Feiler B. Scanxiety. Fear of a postcancer ritual. *Time*. 2011;177(24):56.
2. Arksey H, O'Malley L. Scoping studies: towards a methodological framework. *International Journal of Social Research Methodology*. 2005;8(1):19-32.
3. Levac D, Colquhoun H, O'Brien KK. Scoping studies: advancing the methodology. *Implement Sci*. 2010;5:69.
4. Tricco AC, Lillie E, Zarin W, O'Brien KK, Colquhoun H, Levac D, et al. PRISMA Extension for Scoping Reviews (PRISMA-ScR): Checklist and Explanation. *Ann Intern Med*. 2018;169(7):467-73.

1  
2  
3  
4  
5  
6  
7  
8  
9  
10  
11  
12  
13  
14  
15  
16  
17  
18  
19  
20  
21  
22  
23  
24  
25  
26  
27  
28  
29  
30  
31  
32  
33  
34  
35  
36  
37  
38  
39  
40  
41  
42  
43  
44  
45  
46  
47  
48  
49  
50  
51  
52  
53  
54  
55  
56  
57  
58  
59  
60

For peer review only

**Supplementary File 2. Protocol amendments****Scanxiety: A scoping review about scan-associated anxiety**

The original protocol dated 10/04/2019 was amended as per the following statements:

- 1) The objective 'to explore the experiences of scanxiety for patients and other stakeholders' was abandoned due to feasibility of conducting qualitative and quantitative data analysis with the volume of literature identified
- 2) Inclusion criteria were updated to reflect changes in Amendment 1: experiences of patients with scanxiety were not included; only studies that quantitatively assessed prevalence and severity of scanxiety or met one of the other objectives were included
- 3) As per recommendations on scoping review methodology, exclusion criteria were updated *post hoc* and were expanded to also exclude studies involving follow-up scans for a positive screening result, because the psychological experiences of asymptomatic persons facing a potential new cancer diagnosis may lead to higher anxiety than is attribute to scanxiety itself.
- 4) Exclusion criteria were also updated to reflect changes in Amendment 1, where studies that only qualitatively assessed scanxiety were excluded

## Research checklist

**Scanxiety: A scoping review about scan-associated anxiety**

## Preferred Reporting Items for Systematic reviews and Meta-Analyses extension for Scoping Reviews (PRISMA-ScR) Checklist

| SECTION                          | ITEM | PRISMA-ScR CHECKLIST ITEM                                                                                                                                                                                                                                                                                  | REPORTED ON PAGE # |
|----------------------------------|------|------------------------------------------------------------------------------------------------------------------------------------------------------------------------------------------------------------------------------------------------------------------------------------------------------------|--------------------|
| <b>TITLE</b>                     |      |                                                                                                                                                                                                                                                                                                            |                    |
| Title                            | 1    | Identify the report as a scoping review.                                                                                                                                                                                                                                                                   | 1                  |
| <b>ABSTRACT</b>                  |      |                                                                                                                                                                                                                                                                                                            |                    |
| Structured summary               | 2    | Provide a structured summary that includes (as applicable): background, objectives, eligibility criteria, sources of evidence, charting methods, results, and conclusions that relate to the review questions and objectives.                                                                              | 2                  |
| <b>INTRODUCTION</b>              |      |                                                                                                                                                                                                                                                                                                            |                    |
| Rationale                        | 3    | Describe the rationale for the review in the context of what is already known. Explain why the review questions/objectives lend themselves to a scoping review approach.                                                                                                                                   | 3                  |
| Objectives                       | 4    | Provide an explicit statement of the questions and objectives being addressed with reference to their key elements (e.g., population or participants, concepts, and context) or other relevant key elements used to conceptualize the review questions and/or objectives.                                  | 3                  |
| <b>METHODS</b>                   |      |                                                                                                                                                                                                                                                                                                            |                    |
| Protocol and registration        | 5    | Indicate whether a review protocol exists; state if and where it can be accessed (e.g., a Web address); and if available, provide registration information, including the registration number.                                                                                                             | 3                  |
| Eligibility criteria             | 6    | Specify characteristics of the sources of evidence used as eligibility criteria (e.g., years considered, language, and publication status), and provide a rationale.                                                                                                                                       | 3-4                |
| Information sources              | 7    | Describe all information sources in the search (e.g., databases with dates of coverage and contact with authors to identify additional sources), as well as the date the most recent search was executed.                                                                                                  | 3                  |
| Search                           | 8    | Present the full electronic search strategy for at least 1 database, including any limits used, such that it could be repeated.                                                                                                                                                                            | Figure 1           |
| Selection of sources of evidence | 9    | State the process for selecting sources of evidence (i.e., screening and eligibility) included in the scoping review.                                                                                                                                                                                      | 4                  |
| Data charting process            | 10   | Describe the methods of charting data from the included sources of evidence (e.g., calibrated forms or forms that have been tested by the team before their use, and whether data charting was done independently or in duplicate) and any processes for obtaining and confirming data from investigators. | 4                  |
| Data items                       | 11   | List and define all variables for which data were sought and any assumptions and simplifications made.                                                                                                                                                                                                     | 4                  |

| SECTION                                              | ITEM | PRISMA-ScR CHECKLIST ITEM                                                                                                                                                                             | REPORTED ON PAGE #                   |
|------------------------------------------------------|------|-------------------------------------------------------------------------------------------------------------------------------------------------------------------------------------------------------|--------------------------------------|
| Critical appraisal of individual sources of evidence | 12   | If done, provide a rationale for conducting a critical appraisal of included sources of evidence; describe the methods used and how this information was used in any data synthesis (if appropriate). | N/A                                  |
| Synthesis of results                                 | 13   | Describe the methods of handling and summarizing the data that were charted.                                                                                                                          | 4                                    |
| <b>RESULTS</b>                                       |      |                                                                                                                                                                                                       |                                      |
| Selection of sources of evidence                     | 14   | Give numbers of sources of evidence screened, assessed for eligibility, and included in the review, with reasons for exclusions at each stage, ideally using a flow diagram.                          | Figure 2                             |
| Characteristics of sources of evidence               | 15   | For each source of evidence, present characteristics for which data were charted and provide the citations.                                                                                           | 5-10, including Tables 1 and 2       |
| Critical appraisal within sources of evidence        | 16   | If done, present data on critical appraisal of included sources of evidence (see item 12).                                                                                                            | N/A                                  |
| Results of individual sources of evidence            | 17   | For each included source of evidence, present the relevant data that were charted that relate to the review questions and objectives.                                                                 | 11-18, including Tables 3,4, 5 and 6 |
| Synthesis of results                                 | 18   | Summarize and/or present the charting results as they relate to the review questions and objectives.                                                                                                  | 11-18                                |
| <b>DISCUSSION</b>                                    |      |                                                                                                                                                                                                       |                                      |
| Summary of evidence                                  | 19   | Summarize the main results (including an overview of concepts, themes, and types of evidence available), link to the review questions and objectives, and consider the relevance to key groups.       | 18-19                                |
| Limitations                                          | 20   | Discuss the limitations of the scoping review process.                                                                                                                                                | 19                                   |
| Conclusions                                          | 21   | Provide a general interpretation of the results with respect to the review questions and objectives, as well as potential implications and/or next steps.                                             | 19                                   |
| <b>FUNDING</b>                                       |      |                                                                                                                                                                                                       |                                      |
| Funding                                              | 22   | Describe sources of funding for the included sources of evidence, as well as sources of funding for the scoping review. Describe the role of the funders of the scoping review.                       | 20                                   |
