# Supplementary material for: Scanxiety: a scoping review about scan-associated anxiety
Source: PubMed Central journal article supplement — BMJ Open. 2021 May 26;11(5):e043215. doi: 10.1136/bmjopen-2020-043215 (PMC8160190; doi:10.1136/bmjopen-2020-043215), 2021-05-26
Supplement: bmjopen-2020-043215supp002.pdf [file bmjopen-2020-043215supp002.pdf]

**Supplementary File 2. Protocol amendments****Scanxiety: A scoping review about scan-associated anxiety**

The original protocol dated 10/04/2019 was amended as per the following statements:

- 1) The objective 'to explore the experiences of scanxiety for patients and other stakeholders' was abandoned due to feasibility of conducting qualitative and quantitative data analysis with the volume of literature identified
- 2) Inclusion criteria were updated to reflect changes in Amendment 1: experiences of patients with scanxiety were not included; only studies that quantitatively assessed prevalence and severity of scanxiety or met one of the other objectives were included
- 3) As per recommendations on scoping review methodology, exclusion criteria were updated *post hoc* and were expanded to also exclude studies involving follow-up scans for a positive screening result, because the psychological experiences of asymptomatic persons facing a potential new cancer diagnosis may lead to higher anxiety than is attribute to scanxiety itself.
- 4) Exclusion criteria were also updated to reflect changes in Amendment 1, where studies that only qualitatively assessed scanxiety were excluded
